# Supplementary material for: N-heterocyclic carbene catalyzed [2 + 3] annulation reaction for the synthesis of trifluoroethyl 3,2′-spirooxindole γ-lactam
Source: Royal Society of Chemistry journal article supplement (doi:10.1039/d4ra02252a), 2024-01-01
Supplement: d4ra02252a1.pdf [file d4ra02252a1.pdf]

# N-Heterocyclic Carbene Catalyzed [2+3] Annulation Reaction for the Synthesis of Trifluoroethyl 3,2'-Spirooxindole $\gamma$ -Lactam

Yiru Pu<sup>+,a</sup>, Maolin Wang<sup>+,c</sup>, Wanrong Tian<sup>+,a</sup>, Xian Ge<sup>a</sup>, Dikai Zhu<sup>d</sup>, Chuanqi Wang<sup>a</sup>, Yingjie Zeng<sup>a</sup>, Feiyan Tao<sup>\*,d</sup>, Yun Deng<sup>\*,a</sup> & Jun Lu<sup>\*,a,b</sup>

[a] State Key Laboratory of Southwestern Chinese Medicine Resources, School of Pharmacy, Chengdu University of Traditional Chinese Medicine, Chengdu, 611137, China;

Email: Yun Deng, [dengyun2000@hotmail.com](mailto:dengyun2000@hotmail.com), Jun Lu, [ljaaa111@163.com](mailto:ljaaa111@163.com)

[b] Institute for Advancing Translational Medicine in Bone & Joint Diseases, School of Chinese Medicine, Hong Kong Baptist University, Hong Kong SAR, 999077, China;

[c] Clinical Research Center, The First Affiliated Hospital of Shantou University Medical College, Shantou, Guangdong Province, 515000, China;

[d] Research and Development Centre, China Tobacco Sichuan Industrial Co., Ltd., Chengdu, 610066, China;

Email: Feiyan Tao, [taofeiyan@163.com](mailto:taofeiyan@163.com).

[+] These authors contributed equally.

## CONTENTS:

|                                                                                                                          |     |
|--------------------------------------------------------------------------------------------------------------------------|-----|
| 1. General Information .....                                                                                             | 3   |
| 2. Supplementary Discussion .....                                                                                        | 4   |
| 3. Synthesis and Characterization of <i>N</i> -2,2,2-Trifluoroethylisatinone Imine .....                                 | 5   |
| 4. Synthesis and Characterization of Products (3 <i>S</i> , 3' <i>R</i> )- <b>4</b> and <b>5a</b> .....                  | 11  |
| 5. Gram-Scale Experiment. ....                                                                                           | 28  |
| 6. Synthetic Transformations of (3 <i>S</i> , 3' <i>R</i> )- <b>4l</b> into(3 <i>S</i> , 3' <i>R</i> )- <b>6l</b> . .... | 28  |
| 7. Crystal Data for (3 <i>S</i> , 3' <i>R</i> )- <b>4aa</b> .....                                                        | 29  |
| 8. Computational Details .....                                                                                           | 30  |
| 9. References .....                                                                                                      | 30  |
| 12 NMR Spectra .....                                                                                                     | 82  |
| 13 HPLC Traces .....                                                                                                     | 137 |

## 1. General Information

All the starting materials were obtained from commercial sources (Shanghai Macklin Biochemical Co., Ltd and Chengdu Pukang Biological Technology Co., Ltd) and used without further purification unless otherwise stated. All solvents were dried over activated molecular sieves of appropriate sizes and all reactions were carried out under an argon atmosphere ( $N_2$ ). The progress of the reactions was monitored by thin-layer chromatography (TLC) or liquid chromatography-mass spectrometry (LC-MS), and flash column chromatography was performed using silica gel (200 - 300 mesh).  $^1H$  NMR and  $^{13}C$  NMR spectra were recorded on Bruker-600 MHz or Bruker-700 MHz spectrometer. Chemical shifts ( $\delta$ ) are given in parts per million (ppm), and the residual solvent peaks were used as an internal reference ( $CDCl_3$ :  $\delta$  7.26 ppm  $^1H$ ;  $\delta$  77.2 ppm  $^{13}C$ ;  $d_6$ -DMSO:  $\delta$  2.50 ppm  $^1H$ ;  $\delta$  39.5 ppm  $^{13}C$ ). Enantiomeric excess (ee) values were determined by High Performance Liquid Chromatography (HPLC) analysis using chiral column (CHIRALPAK IB N-5) described below in detail. Specific rotation was measured on a Rudolph Research Analytical at 20 °C using a quartz glass cell (100 mm path length). Accurate mass measurements were performed on the electrospray ionization (ESI) apparatus using Agilent 1260-Bruker tims TOF mass.

## 2. Supplementary Discussion

Table S1. Optimization of conditions<sup>a</sup>

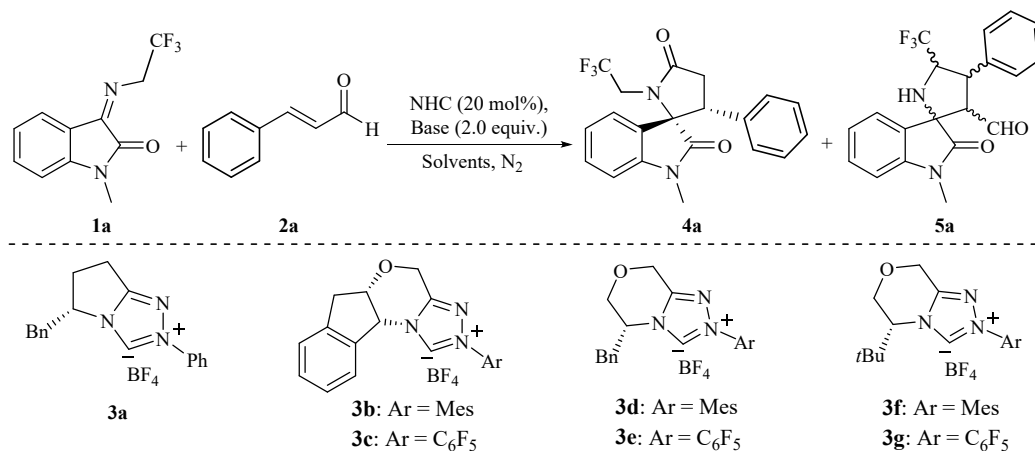

| Entry    | NHC       | Base                           | Solvent            | Temp.<br>(°C) | Yield (%) <sup>b</sup> |           | dr <sup>c</sup> | ee <sup>d</sup> |
|----------|-----------|--------------------------------|--------------------|---------------|------------------------|-----------|-----------------|-----------------|
|          |           |                                |                    |               | <b>4a</b>              | <b>5a</b> |                 |                 |
| <b>1</b> | <b>3f</b> | Et <sub>3</sub> N              | DCE                | 20 °C         | 68                     | 8         | 13:1            | 82              |
| <b>2</b> | <b>3f</b> | Et <sub>3</sub> N              | CH <sub>3</sub> CN | 20 °C         | 49                     | 10        | 10:1            | 62              |
| <b>3</b> | <b>3f</b> | Et <sub>3</sub> N              | CHCl <sub>3</sub>  | 20 °C         | 62                     | 21        | >20:1           | 88              |
| <b>4</b> | <b>3f</b> | DMAP                           | DCM                | 20 °C         | 34                     | 34        | --              | 38              |
| <b>5</b> | <b>3f</b> | <i>t</i> BuOK                  | DCM                | 20 °C         | 38                     | 44        | --              | 36              |
| <b>6</b> | <b>3f</b> | DBU                            | DCM                | 20 °C         | 46                     | 33        | --              | 52              |
| <b>7</b> | <b>3f</b> | K <sub>2</sub> CO <sub>3</sub> | DCM                | 20 °C         | 68                     | 22        | >20:1           | 84              |

<sup>a</sup>Reactions were performed with **1a** (0.10 mmol), **2a** (0.15 mmol), **3f** (20 mol%) and Base (2.0 equiv.) in solvent (1.0 mL) at 20 °C for 24 h under N<sub>2</sub>. <sup>b</sup>Isolated yields. <sup>c</sup>dr values were determined by <sup>1</sup>H NMR analysis of the crude product. <sup>d</sup>ee values were determined by HPLC using a chiral column.

### 3. Synthesis and Characterization of *N*-2,2,2-Trifluoroethylisatinone Imines

General Procedure A:

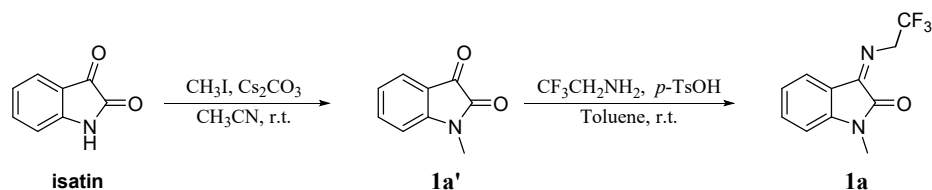

**Step 1:** A mixture of isatin (1.0 g, 6.80 mmol), cesium carbonate (2.4 g, 7.51 mmol), and dry  $\text{CH}_3\text{CN}$  (40.0 mL) was stirred at room temperature for half an hour. The iodomethane (0.9 mL, 1.0 equiv.) was added to the reaction mixture and monitored by TLC until isatin was consumed. The reaction was quenched by pouring the emulsion into 30.0 mL water and extracted with ethyl acetate (60.0 mL  $\times$  3). The organic layer was separated, washed with brine, then the combined organic layers were dried over  $\text{Na}_2\text{SO}_4$ , and concentrated under reduced pressure to afford the product **1a'** (1.1 g, 97% yield) as a red solid. The **1a'** was used for the next step without further purification.

**Step 2:** The crude **1a'** (0.5 g, 3.12 mmol) was dissolved in toluene (15.0 mL), then the 2,2,2-Trifluoroethylamine (0.5 g, 4.70 mmol) and *p*-toluenesulfonic acid hydrate (0.1 g, 0.31 mmol) were added to the reaction mixture. The reaction was monitored by TLC until the reaction was finished. The resulting solution was filtered and concentrated in vacuo, followed by the addition of a saturated aqueous solution of sodium bicarbonate (10.0 mL), then the aqueous layer was extracted with ethyl acetate (20.0 mL  $\times$  3). The combined organic phases were dried over  $\text{Na}_2\text{SO}_4$  and evaporated on a rotary evaporator to give the crude product, which was purified by flash chromatography on silica gel (petroleum ether : ethyl acetate = 4 : 1) to afford desired product **1a** (0.7 g, 91% yield) as a yellow solid.

Compounds **1b-1f** were synthesized according to the above procedure.

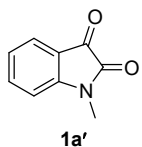

**1-methylindoline-2,3-dione (1a')** was synthesized according to general procedure A (step 1) as a red solid in 98% yield.  $^1\text{H NMR}$  (600 MHz,  $\text{CDCl}_3$ )  $\delta$  7.65 – 7.58 (m, 2H), 7.14 (td,  $J = 7.6, 0.8$  Hz, 1H), 6.90 (d,  $J = 8.1$  Hz, 1H), 3.26 (s, 3H).  $^{13}\text{C NMR}$  (151 MHz,  $\text{CDCl}_3$ )  $\delta$  183.36, 158.25, 151.48, 138.39, 125.33, 123.85, 117.48, 109.91, 26.24.

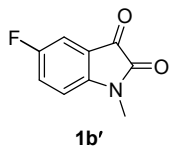

**5-fluoro-1-methylindoline-2,3-dione (1b')** was synthesized according to general procedure A (step 1) as a red solid in 97% yield.  $^1\text{H NMR}$  (600 MHz,  $\text{CDCl}_3$ )  $\delta$  7.38 – 7.29 (m, 2H), 6.89 (dd,  $J = 8.5, 3.6$  Hz, 1H), 3.26 (s, 3H).  $^{13}\text{C NMR}$  (151 MHz,  $\text{CDCl}_3$ )  $\delta$  182.52 (d,  $J = 2.3$  Hz), 159.95, 158.02 (d,  $J = 89.8$  Hz), 147.25 (d,  $J = 2.2$  Hz), 124.43 (d,  $J = 24.2$  Hz), 117.74 (d,  $J = 7.0$  Hz), 112.14 (d,  $J = 24.3$  Hz), 110.83 (d,  $J = 7.2$  Hz), 26.10.

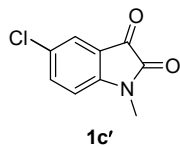

**5-chloro-1-methylindoline-2,3-dione (1c')** was synthesized according to general procedure A (step 1) as a red solid in 99% yield.  $^1\text{H NMR}$  (600 MHz,  $\text{CDCl}_3$ )  $\delta$  7.70 – 7.41 (m, 2H), 6.87 (dd,  $J = 8.3, 0.6$  Hz, 1H), 3.26 (s, 3H).  $^{13}\text{C NMR}$  (151 MHz,  $\text{CDCl}_3$ )  $\delta$  182.34, 157.69, 149.71, 137.77, 129.70, 125.25, 118.25, 111.23, 26.40.

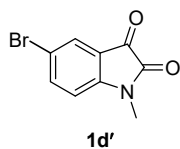

**5-bromo-1-methylindoline-2,3-dione (1d')** was synthesized according to general procedure A (step 1) as a red solid in 99% yield.  $^1\text{H NMR}$  (600 MHz,  $\text{CDCl}_3$ )  $\delta$  7.73 (dd,  $J = 8.3, 2.1$  Hz, 1H), 7.70 (d,  $J = 1.9$  Hz, 1H), 6.83 (d,  $J = 8.3$  Hz, 1H), 3.26 (s, 3H).  $^{13}\text{C NMR}$  (151 MHz,  $\text{CDCl}_3$ )  $\delta$  182.18, 157.50, 150.14, 140.63, 128.07, 118.57, 116.67, 111.66, 26.37.

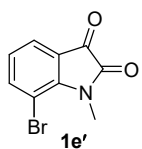

**7-bromo-1-methylindoline-2,3-dione (1e')** was synthesized according to general procedure A (step 1) as a red solid in 95% yield.  $^1\text{H NMR}$  (600 MHz,  $\text{CDCl}_3$ )  $\delta$  7.71 (dd,  $J = 8.1, 1.3$  Hz, 1H), 7.57 (dd,  $J = 7.3, 1.3$  Hz, 1H), 7.00 (dd,  $J = 8.1, 7.2$  Hz, 1H), 3.65 (s, 3H).  $^{13}\text{C NMR}$  (151 MHz,  $\text{CDCl}_3$ )  $\delta$  182.45, 158.57, 148.25, 143.78, 125.12, 124.48, 120.40, 104.32, 29.73.

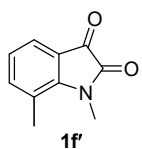

**1,7-dimethylindoline-2,3-dione (1f')** was synthesized according to general procedure A (step 1) as a red solid in 94% yield.  $^1\text{H NMR}$  (600 MHz,  $\text{CDCl}_3$ )  $\delta$  7.45 (d,  $J = 7.3$  Hz,

1H), 7.33 (dt,  $J = 7.7, 0.7$  Hz, 1H), 7.00 (t,  $J = 7.5$  Hz, 1H), 3.52 (s, 3H), 2.57 (s, 3H).  $^{13}\text{C}$  NMR (151 MHz,  $\text{CDCl}_3$ )  $\delta$  183.79, 159.24, 148.99, 142.27, 123.89, 123.40, 121.92, 118.50, 29.73, 18.85.

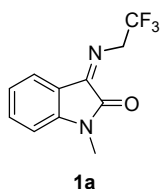

**1-methyl-3-((2,2,2-trifluoroethyl)imino)indolin-2-one (1a)** was synthesized according to general procedure A (step 2) as a yellow solid in 91% yield.  $^1\text{H}$  NMR (700 MHz,  $\text{CDCl}_3$ )  $\delta$  7.70 (dd,  $J = 7.6, 1.3$  Hz, 1H), 7.46 (td,  $J = 7.7, 1.3$  Hz, 1H), 7.11 (td,  $J = 7.5, 0.9$  Hz, 1H), 6.83 (d,  $J = 7.7$  Hz, 1H), 4.83 (q,  $J = 9.7$  Hz, 2H), 3.22 (s, 3H).  $^{13}\text{C}$  NMR (176 MHz,  $\text{CDCl}_3$ )  $\delta$  158.64, 155.74, 146.26, 133.79, 125.03 (q,  $J = 276.0$  Hz), 123.47, 122.98, 120.55, 108.76, 53.51 (q,  $J = 32.3$  Hz), 25.82.

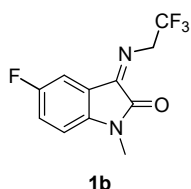

**5-fluoro-1-methyl-3-((2,2,2-trifluoroethyl)imino)indolin-2-one (1b)** was synthesized according to general procedure A (step 2) as a yellow solid in 78% yield.  $^1\text{H}$  NMR (600 MHz,  $\text{CDCl}_3$ )  $\delta$  7.44 (dd,  $J = 7.3, 2.7$  Hz, 1H), 7.18 (td,  $J = 8.7, 2.7$  Hz, 1H), 6.79 (dd,  $J = 8.5, 3.8$  Hz, 1H), 4.83 (q,  $J = 9.7$  Hz, 2H), 3.23 (s, 3H).  $^{13}\text{C}$  NMR (151 MHz,  $\text{CDCl}_3$ )  $\delta$  160.37, 158.61 (d,  $J = 44.1$  Hz), 155.31 (d,  $J = 3.1$  Hz), 142.25 (d,  $J = 2.2$  Hz), 124.86 (q,  $J = 276.3$  Hz), 121.66 (d,  $J = 8.3$  Hz), 120.04 (d,  $J = 24.2$  Hz), 110.65 (d,  $J = 25.3$  Hz), 109.60 (d,  $J = 7.8$  Hz), 53.63 (q,  $J = 32.4$  Hz), 25.98.

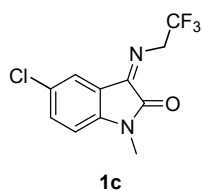

**5-chloro-1-methyl-3-((2,2,2-trifluoroethyl)imino)indolin-2-one (1c)** was synthesized according to general procedure A (step 2) as a yellow solid in 87% yield.  $^1\text{H}$  NMR (600 MHz,  $\text{CDCl}_3$ )  $\delta$  7.68 (d,  $J = 2.1$  Hz, 1H), 7.43 (dd,  $J = 8.3, 2.2$  Hz, 1H), 6.78 (d,  $J = 8.3$  Hz, 1H), 4.82 (q,  $J = 9.6$  Hz, 2H), 3.22 (s, 3H).  $^{13}\text{C}$  NMR (151 MHz,  $\text{CDCl}_3$ )  $\delta$  158.17, 154.88, 144.59, 133.34, 129.23, 124.84 (q,  $J = 276.1$  Hz), 123.20, 121.69, 109.91, 53.67 (q,  $J = 32.6$  Hz), 25.98.

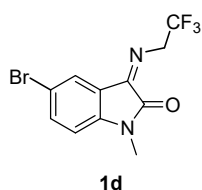

**5-bromo-1-methyl-3-((2,2,2-trifluoroethyl)imino)indolin-2-one (1d)** was synthesized according to general procedure A (step 2) as a yellow solid in 89% yield.  $^1\text{H}$  NMR (600 MHz,  $\text{CDCl}_3$ )  $\delta$  7.83 (d,  $J = 2.0$  Hz, 1H), 7.58 (dd,  $J = 8.3, 2.0$  Hz, 1H), 6.74 (d,  $J = 8.3$  Hz, 1H), 4.82 (q,  $J = 9.6$  Hz, 2H), 3.22 (s, 3H).  $^{13}\text{C}$  NMR (151 MHz,  $\text{CDCl}_3$ )  $\delta$  158.03, 154.74, 145.06, 136.22, 126.00, 124.84 (q,  $J = 276.3$  Hz), 122.01, 116.36,

110.35, 53.68 (q,  $J = 32.7$  Hz), 25.97.

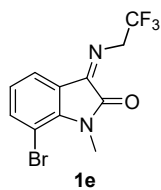

**7-bromo-1-methyl-3-((2,2,2-trifluoroethyl)imino)indolin-2-one (1e)** was synthesized according to general procedure A (step 2) as a yellow solid in 82% yield.

**$^1\text{H NMR}$  (600 MHz,  $\text{CDCl}_3$ )**  $\delta$  7.66 (dd,  $J = 7.3, 1.2$  Hz, 1H), 7.55 (dd,  $J = 8.1, 1.2$  Hz, 1H), 6.96 (dd,  $J = 8.1, 7.4$  Hz, 1H), 4.81 (q,  $J = 9.7$  Hz, 2H), 3.60 (s, 3H).  **$^{13}\text{C NMR}$  (151 MHz,  $\text{CDCl}_3$ )**  $\delta$  158.76, 154.64, 143.28, 139.16, 124.89 (q,  $J = 276.2$  Hz), 124.61, 123.49, 122.04, 103.05, 53.86 (q,  $J = 32.5$  Hz), 29.21.

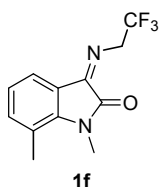

**1,7-dimethyl-3-((2,2,2-trifluoroethyl)imino)indolin-2-one (1f)** was synthesized according to general procedure A (step 2) as a yellow solid in 75% yield.  **$^1\text{H NMR}$  (600 MHz,  $\text{CDCl}_3$ )**  $\delta$  7.56 (d,  $J = 7.4$  Hz, 1H), 7.18 (d,  $J = 7.7$  Hz, 1H), 6.98 (t,  $J = 7.6$  Hz, 1H), 4.81 (q,  $J = 9.8$  Hz, 2H), 3.48 (s, 3H), 2.54 (s, 3H).  **$^{13}\text{C NMR}$  (151 MHz,  $\text{CDCl}_3$ )**  $\delta$  159.30, 155.76, 143.91, 137.57, 125.08 (q,  $J = 276.3$  Hz), 123.40, 121.33, 120.96, 120.51, 53.60 (q,  $J = 32.2$  Hz), 29.13, 18.77.

General Procedure B:

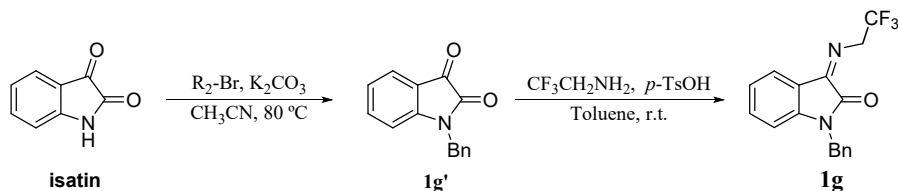

**Step 1:** To a solution of isatin (1.0 g, 6.80 mmol) and  $\text{K}_2\text{CO}_3$  (2.8 g, 20.41 mmol) in  $\text{CH}_3\text{CN}$  (40.0 mL) was added benzyl bromide (1.2 g, 6.80 mmol) at room temperature. Then the mixture was stirred at 80 °C in an oil bath and monitored by TLC until isatin was consumed. The filtrate was concentrated under vacuum to give the residue, which was purified via silica gel column chromatography (petroleum ether : ethyl acetate = 4 : 1) to afford product **1g'** (1.6 g, 98% yield) as a red solid. The product **1g** was synthesized according to the above general procedure A Step 2.

Compounds **1h-1k** were synthesized according to the above procedure.

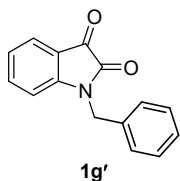

**1-benzylindoline-2,3-dione (1g')** was synthesized according to general procedure B (step 1) as a red solid in 99% yield.  $^1\text{H NMR}$  (600 MHz,  $\text{CDCl}_3$ )  $\delta$  7.61 (dd,  $J = 7.6$ , 1.3 Hz, 1H), 7.48 (td,  $J = 7.8$ , 1.4 Hz, 1H), 7.38 – 7.27 (m, 5H), 7.09 (td,  $J = 7.5$ , 0.8 Hz, 1H), 6.78 (d,  $J = 7.9$  Hz, 1H), 4.93 (s, 2H).  $^{13}\text{C NMR}$  (151 MHz,  $\text{CDCl}_3$ )  $\delta$  183.25, 158.27, 150.72, 138.33, 134.50, 129.05, 128.16, 127.43, 125.41, 123.87, 117.67, 111.01, 44.04.

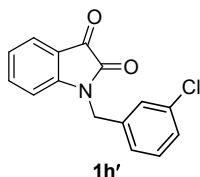

**1-(3-chlorobenzyl)indoline-2,3-dione (1h')** was synthesized according to general procedure B (step 1) as a red solid in 99% yield.  $^1\text{H NMR}$  (600 MHz,  $\text{CDCl}_3$ )  $\delta$  7.63 (ddd,  $J = 7.5$ , 1.3, 0.6 Hz, 1H), 7.52 (td,  $J = 7.8$ , 1.4 Hz, 1H), 7.33 (dt,  $J = 2.4$ , 1.2 Hz, 1H), 7.31 – 7.27 (m, 2H), 7.24 – 7.21 (m, 1H), 7.12 (td,  $J = 7.5$ , 0.8 Hz, 1H), 6.77 (d,  $J = 7.9$  Hz, 1H), 4.91 (s, 2H).  $^{13}\text{C NMR}$  (151 MHz,  $\text{CDCl}_3$ )  $\delta$  182.90, 158.24, 150.36, 138.45, 136.59, 134.99, 130.39, 128.47, 127.48, 125.59, 125.53, 124.11, 117.69, 110.80, 43.49.

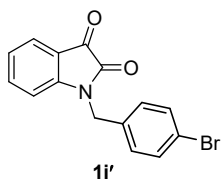

**1-(4-bromobenzyl)indoline-2,3-dione (1i')** was synthesized according to general procedure B (step 1) as a red solid in 96% yield.  $^1\text{H NMR}$  (600 MHz,  $\text{CDCl}_3$ )  $\delta$  7.62 (dd,  $J = 7.4$ , 1.3 Hz, 1H), 7.53 – 7.47 (m, 3H), 7.25 – 7.20 (m, 2H), 7.11 (td,  $J = 7.6$ , 0.8 Hz, 1H), 6.75 (d,  $J = 8.0$  Hz, 1H), 4.88 (s, 2H).  $^{13}\text{C NMR}$  (151 MHz,  $\text{CDCl}_3$ )  $\delta$  182.95, 158.23, 150.36, 138.38, 133.56, 132.22, 129.13, 125.57, 124.08, 122.19, 117.69, 110.81, 43.47.

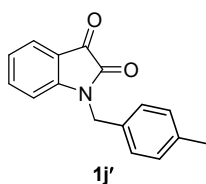

**1-(4-methylbenzyl)indoline-2,3-dione (1j')** was synthesized according to general procedure B (step 1) as a red solid in 98% yield.  $^1\text{H NMR}$  (600 MHz,  $\text{CDCl}_3$ )  $\delta$  7.60 (dd,  $J = 7.5$ , 1.3 Hz, 1H), 7.47 (td,  $J = 7.8$ , 1.4 Hz, 1H), 7.23 (d,  $J = 8.1$  Hz, 1H), 7.15 (d,  $J = 7.9$  Hz, 2H), 7.08 (td,  $J = 7.6$ , 0.9 Hz, 1H), 6.79 (d,  $J = 8.0$  Hz, 1H), 4.89 (s, 2H), 2.32 (s, 3H).  $^{13}\text{C NMR}$  (151 MHz,  $\text{CDCl}_3$ )  $\delta$  183.36, 158.25, 150.79, 138.29, 137.98, 131.44, 129.70, 127.46, 125.37, 123.80, 117.67, 111.05, 43.82, 21.12.

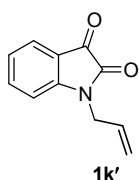

**1-allylindoline-2,3-dione (1k')** was synthesized according to general procedure B (step 1) as a red solid in 90% yield.  $^1\text{H NMR}$  (600 MHz,  $\text{CDCl}_3$ )  $\delta$  7.60 (ddd,  $J = 7.4$ , 1.4, 0.6 Hz, 1H), 7.56 (td,  $J = 7.8$ , 1.4 Hz, 1H), 7.11 (td,  $J = 7.5$ , 0.8 Hz, 1H), 6.89 (d,  $J = 7.9$  Hz,



1H), 5.84 (ddt,  $J = 17.2, 10.5, 5.4$  Hz, 1H), 5.36 – 5.24 (m, 2H), 4.36 (dt,  $J = 5.4, 1.7$  Hz, 2H).  $^{13}\text{C}$  NMR (151 MHz,  $\text{CDCl}_3$ )  $\delta$  183.26, 157.92, 150.83, 138.35, 130.34, 125.39, 123.82, 118.66, 117.57, 110.92, 42.51.

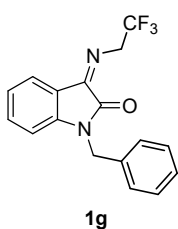

**1-benzyl-3-((2,2,2-trifluoroethyl)imino)indolin-2-one (1g)** was synthesized according to general procedure B (step 2) as a yellow solid in 82% yield.  $^1\text{H}$  NMR (600 MHz,  $\text{CDCl}_3$ )  $\delta$  7.73 (dd,  $J = 7.5, 1.3$  Hz, 1H), 7.38 – 7.28 (m, 6H), 7.09 (td,  $J = 7.6, 0.9$  Hz, 1H), 6.74 (d,  $J = 8.1$  Hz, 1H), 4.97 – 4.75 (m, 4H).  $^{13}\text{C}$  NMR (151 MHz,  $\text{CDCl}_3$ )  $\delta$  158.61, 155.58, 145.49, 134.93, 133.72, 128.99, 128.03, 127.35, 125.02 (q,  $J = 276.3$  Hz), 123.50, 123.12, 120.72, 109.76, 53.64 (q,  $J = 32.5$  Hz), 43.63.

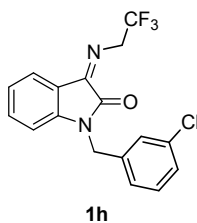

**1-(3-chlorobenzyl)-3-((2,2,2-trifluoroethyl)imino)indolin-2-one (1h)** was synthesized according to general procedure B (step 2) as a yellow solid in 76% yield.  $^1\text{H}$  NMR (600 MHz,  $\text{CDCl}_3$ )  $\delta$  7.74 (dd,  $J = 7.5, 1.3$  Hz, 1H), 7.38 (td,  $J = 7.8, 1.3$  Hz, 1H), 7.31 – 7.26 (m, 3H), 7.19 (td,  $J = 4.6, 1.5$  Hz, 1H), 7.11 (td,  $J = 7.6, 0.9$  Hz, 1H), 6.72 (d,  $J = 7.9$  Hz, 1H), 4.91 – 4.83 (m, 4H).  $^{13}\text{C}$  NMR (151 MHz,  $\text{CDCl}_3$ )  $\delta$  158.53, 155.33, 145.16, 137.00, 134.93, 133.82, 130.30, 128.34, 127.43, 125.47, 124.99 (q,  $J = 276.3$  Hz), 123.73, 123.28, 120.72, 109.57, 53.70 (q,  $J = 32.5$  Hz), 43.09.

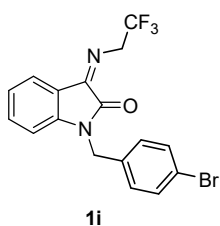

**1-(4-bromobenzyl)-3-((2,2,2-trifluoroethyl)imino)indolin-2-one (1i)** was synthesized according to general procedure B (step 2) as a yellow solid in 80% yield.  $^1\text{H}$  NMR (600 MHz,  $\text{CDCl}_3$ )  $\delta$  7.73 (dd,  $J = 7.5, 1.3$  Hz, 1H), 7.47 (d,  $J = 8.4$  Hz, 2H), 7.36 (td,  $J = 7.8, 1.3$  Hz, 1H), 7.19 (d,  $J = 8.4$  Hz, 2H), 7.11 (td,  $J = 7.6, 0.9$  Hz, 1H), 6.70 (d,  $J = 7.9$  Hz, 1H), 4.90 – 4.83 (m, 4H).  $^{13}\text{C}$  NMR (151 MHz,  $\text{CDCl}_3$ )  $\delta$  158.53, 155.37, 145.15, 133.97, 133.77, 132.14, 129.05, 124.98 (q,  $J = 276.3$  Hz), 123.70, 123.27, 122.04, 120.72, 109.58, 53.68 (q,  $J = 32.3$  Hz), 43.05.

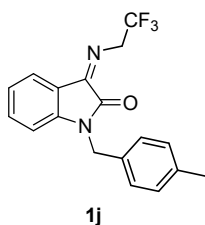

**1-(4-methylbenzyl)-3-((2,2,2-trifluoroethyl)imino)indolin-2-one (1j)** was synthesized according to general procedure B (step 2) as a yellow solid in 78% yield.  $^1\text{H}$  NMR (600 MHz,  $\text{CDCl}_3$ )  $\delta$  7.72 (dd,  $J = 7.5, 1.3$  Hz, 1H), 7.35 (td,  $J = 7.8, 1.3$

Hz, 1H), 7.22 – 7.19 (m, 2H), 7.14 (d,  $J = 7.8$  Hz, 2H), 7.08 (td,  $J = 7.6, 0.9$  Hz, 1H), 6.78 – 6.74 (m, 1H), 4.91 – 4.85 (m, 4H), 2.32 (s, 3H).  $^{13}\text{C}$  NMR (151 MHz,  $\text{CDCl}_3$ )  $\delta$  157.28, 154.34, 144.23, 136.50, 132.37, 130.57, 128.32, 126.05, 123.71 (q,  $J = 276.3$  Hz), 122.11, 121.76, 119.39, 108.46, 52.30 (q,  $J = 32.3$  Hz), 42.08, 19.80.

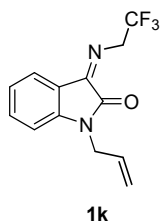

**1k**

**1-allyl-3-((2,2,2-trifluoroethyl)imino)indolin-2-one (1k)** was synthesized according to general procedure B (step 2) as a yellow solid in 75% yield.  $^1\text{H}$  NMR (600 MHz,  $\text{CDCl}_3$ )  $\delta$  7.72 (dd,  $J = 7.5, 1.3$  Hz, 1H), 7.43 (td,  $J = 7.8, 1.3$  Hz, 1H), 7.11 (td,  $J = 7.6, 0.9$  Hz, 1H), 6.84 (d,  $J = 7.9$  Hz, 1H), 5.84 (ddt,  $J = 17.2, 10.6, 5.3$  Hz, 1H), 5.34 – 5.25 (m, 2H), 4.84 (q,  $J = 9.7$  Hz, 2H), 4.34 (dt,  $J = 5.3, 1.7$  Hz, 2H).  $^{13}\text{C}$  NMR (151 MHz,  $\text{CDCl}_3$ )  $\delta$  158.27, 155.60, 145.55, 133.71, 130.63, 125.02 (q,  $J = 276.3$  Hz), 123.43, 123.09, 120.63, 118.28, 109.65, 53.57 (q,  $J = 32.3$  Hz), 42.11.

#### 4. Synthesis and Characterization of Products (3*S*, 3'*R*)-4 and 5a.

General Procedure C :

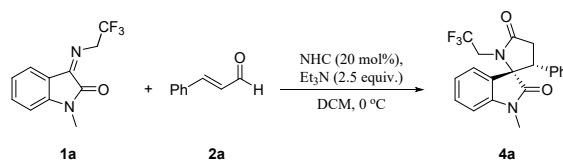

To a flame-dried Schlenk tube was added the co-incubation activation of NHC (16.0 mg, 0.20 mmol) and base (41.7 mg, 2.0 equiv.) in dry DCM for 0.5 h, then the vial was sealed under  $\text{N}_2$ , followed by the addition of **1a** (50.0 mg, 0.10 mmol) and **2a** (40.9 mg, 0.15 mmol), the reaction at 0 °C for 24 h. After the solvent was completely removed, the resulting residue was extracted with ethyl acetate (10.0 mL  $\times$  3), and then combined organic layers were dried over  $\text{Na}_2\text{SO}_4$ , filtered, and concentrated in vacuo. The crude residue was purified via silica gel column chromatography (petroleum ether : ethyl acetate = 4 : 1) to make product **4a** (80% yield, 98% ee) a white solid. Enantiomeric excess (ee %) values were determined by HPLC analysis using the chiral column described below.

Compounds **4b-4ae** were synthesized according to the above procedure.

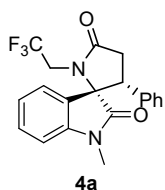

(**3S**, **3'R**)-1-methyl-3'-phenyl-1'-(2,2,2-trifluoroethyl)spiro[indoline-3,2'-pyrrolidine]-2,5'-dione (**4a**) was synthesized according to general procedure C as a

white solid in 80% yield. <sup>1</sup>H NMR (600 MHz, CDCl<sub>3</sub>) δ 7.42 – 7.37 (m, 2H), 7.25 – 7.21 (m, 1H), 7.19 – 7.16 (m, 1H), 7.12 (t, *J* = 7.5 Hz, 2H), 6.85 (d, *J* = 7.4 Hz, 2H),

6.68 – 6.64 (m, 1H), 3.95 (dq, *J* = 15.3, 9.5 Hz, 1H), 3.81 (dd, *J* = 13.2, 7.8 Hz, 1H), 3.61 (dd, *J* = 16.3, 13.2 Hz, 1H), 3.53 (dt, *J* = 17.4, 8.7 Hz, 1H), 2.79 – 2.73 (m, 1H), 2.73 (s, 3H). <sup>13</sup>C NMR (151 MHz, CDCl<sub>3</sub>) δ 175.92, 173.11, 143.71, 134.02, 132.67, 128.63, 128.47, 128.04, 127.47, 126.39, 123.39 (d, *J* = 280.4 Hz), 115.94, 110.40, 73.70, 52.02, 42.64 (q, *J* = 35.6 Hz), 32.99, 25.96. HRMS (ESI) calculated [M+Na]<sup>+</sup> for C<sub>20</sub>H<sub>17</sub>F<sub>3</sub>N<sub>2</sub>O<sub>2</sub>Na: 397.1140, found: 397.1133. [α]<sup>20</sup><sub>D</sub> = +67 (c = 0.1, CHCl<sub>3</sub>). 98% ee as determined by HPLC (CHIRALPAK IB N-5 Column, hexane/ethanol/diethylamine = 80/20/0.1; 1.0 ml/min, wavelength = 254 nm), t<sub>R</sub> (minor) = 7.643 min, t<sub>R</sub> (major) = 9.690 min.

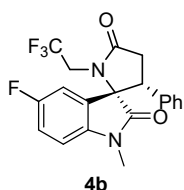

(**3S**, **3'R**)-5-fluoro-1-methyl-3'-phenyl-1'-(2,2,2-trifluoroethyl)spiro[indoline-3,2'-pyrrolidine]-2,5'-dione (**4b**) was synthesized according to general procedure C as a

light yellow solid in 81% yield. <sup>1</sup>H NMR (600 MHz, CDCl<sub>3</sub>) δ 7.25 – 7.07 (m, 5H), 6.91 – 6.83 (m, 2H), 6.60 (dd, *J* = 8.5, 4.0 Hz, 1H), 3.90 (dq, *J* = 15.4, 9.4 Hz,

1H), 3.77 (dd, *J* = 13.1, 7.8 Hz, 1H), 3.65 – 3.54 (m, 2H), 2.76 (ddd, *J* = 16.4, 7.9, 0.7 Hz, 1H), 2.72 (s, 3H). <sup>13</sup>C NMR (151 MHz, CDCl<sub>3</sub>) δ 175.89, 173.21, 159.36 (d, *J* = 243.2 Hz), 140.41 (d, *J* = 2.2 Hz), 132.56, 128.39, 128.24, 127.85, 125.73 (d, *J* = 7.7 Hz), 123.23 (q, *J* = 280.3 Hz), 117.39 (d, *J* = 23.3 Hz), 112.30 (d, *J* = 25.1 Hz), 109.49 (d, *J* = 7.9 Hz), 73.89, 51.74, 42.60 (q, *J* = 35.6 Hz), 32.87, 25.81. HRMS (ESI) calculated [M+Na]<sup>+</sup> for C<sub>20</sub>H<sub>16</sub>F<sub>4</sub>N<sub>2</sub>O<sub>2</sub>Na: 415.1046, found: 415.1040. [α]<sup>20</sup><sub>D</sub> = +78 (c = 0.3, CHCl<sub>3</sub>). 99% ee as determined by HPLC (CHIRALPAK IB N-5 Column, hexane/ethanol/diethylamine = 80/20/0.1; 1.0 ml/min, wavelength = 254 nm), t<sub>R</sub> (minor) = 7.013 min, t<sub>R</sub> (major) = 9.128 min.

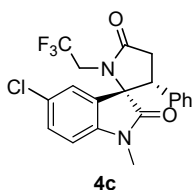

(**3S**, **3'R**)-5-chloro-1-methyl-3'-phenyl-1'-(2,2,2-trifluoroethyl)spiro[indoline-3,2'-pyrrolidine]-2,5'-dione (**4c**) was synthesized according to general procedure C as a

light yellow solid in 67% yield. <sup>1</sup>H NMR (600 MHz, CDCl<sub>3</sub>) δ 7.40 – 7.34 (m, 2H), 7.24 – 7.18 (m, 1H), 7.18 – 7.12 (m, 2H), 6.90 – 6.85 (m, 2H), 6.59 (d, *J* = 8.2

Hz, 1H), 3.99 (dq,  $J = 15.4, 9.5$  Hz, 1H), 3.78 (dd,  $J = 13.1, 7.8$  Hz, 1H), 3.62 – 3.48 (m, 2H), 2.75 (ddd,  $J = 16.4, 7.9, 0.8$  Hz, 1H), 2.70 (s, 3H).  $^{13}\text{C}$  NMR (151 MHz,  $\text{CDCl}_3$ )  $\delta$  175.76, 173.03, 143.01, 132.48, 130.92, 128.69, 128.42, 128.26, 127.84, 125.85, 124.53, 123.19 (q,  $J = 280.3$  Hz), 109.75, 73.59, 51.81, 42.46 (q,  $J = 35.7$  Hz), 32.80, 25.78. HRMS (ESI) calculated  $[\text{M}+\text{Na}]^+$  for  $\text{C}_{20}\text{H}_{16}\text{ClF}_3\text{N}_2\text{O}_2\text{Na}$ : 431.0750, found: 431.0744.  $[\alpha]^{20}_{\text{D}} = +52$  ( $c = 0.1$ ,  $\text{CHCl}_3$ ). 92% ee as determined by HPLC (CHIRALPAK IB N-5 Column, hexane/ethanol/diethylamine = 80/20/0.1; 1.0 ml/min, wavelength = 254 nm),  $t_{\text{R}}$  (minor) = 6.757 min,  $t_{\text{R}}$  (major) = 8.492 min.

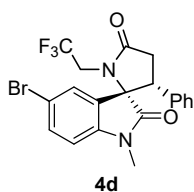

**(3*S*, 3'*R*)-5-bromo-1-methyl-3'-phenyl-1'-(2,2,2-trifluoroethyl)spiro[indoline-3,2'-pyrrolidine]-2,5'-dione (4d)** was synthesized according to general procedure C as a white solid in 75% yield.  $^1\text{H}$  NMR (600 MHz,  $\text{CDCl}_3$ )  $\delta$  7.55 – 7.50 (m, 2H), 7.24 – 7.18 (m, 1H), 7.18 – 7.11 (m, 2H), 6.88 (dd,  $J = 8.2, 1.3$  Hz, 2H), 6.55 (d,  $J =$

8.8 Hz, 1H), 4.01 (dq,  $J = 15.3, 9.5$  Hz, 1H), 3.78 (dd,  $J = 13.1, 7.9$  Hz, 1H), 3.58 (dd,  $J = 16.4, 13.2$  Hz, 1H), 3.52 (dt,  $J = 15.2, 8.7$  Hz, 1H), 2.75 (dd,  $J = 16.3, 7.9$  Hz, 1H), 2.70 (s, 3H).  $^{13}\text{C}$  NMR (151 MHz,  $\text{CDCl}_3$ )  $\delta$  175.72, 172.91, 143.51, 133.82, 132.47, 128.43, 128.26, 127.84, 127.26, 126.19, 123.19 (q,  $J = 280.3$  Hz), 115.74, 110.20, 73.50, 51.82, 42.44 (q,  $J = 35.5$  Hz), 32.79, 25.75. HRMS (ESI) calculated  $[\text{M}+\text{Na}]^+$  for  $\text{C}_{20}\text{H}_{16}\text{BrF}_3\text{N}_2\text{O}_2\text{Na}$ : 475.0245, found: 475.0239.  $[\alpha]^{20}_{\text{D}} = +79$  ( $c = 0.1$ ,  $\text{CHCl}_3$ ). 92% ee as determined by HPLC (CHIRALPAK IB N-5 Column, hexane/ethanol/diethylamine = 80/20/0.1; 1.0 ml/min, wavelength = 254 nm),  $t_{\text{R}}$  (minor) = 7.352 min,  $t_{\text{R}}$  (major) = 9.667 min.

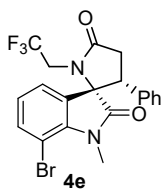

**(3*S*, 3'*R*)-7-bromo-1-methyl-3'-phenyl-1'-(2,2,2-trifluoroethyl)spiro[indoline-3,2'-pyrrolidine]-2,5'-dione (4e)** was synthesized according to general procedure C as a light yellow solid in 68% yield.  $^1\text{H}$  NMR (600 MHz,  $\text{CDCl}_3$ )  $\delta$  7.51 (dd,  $J = 8.1, 1.1$  Hz, 1H), 7.32 (dd,  $J = 7.4, 1.1$  Hz, 1H), 7.26 – 7.22 (m, 1H), 7.18 (t,  $J = 7.6$  Hz, 2H),

7.09 (dd,  $J = 8.2, 7.3$  Hz, 1H), 6.83 (dd,  $J = 7.3, 1.7$  Hz, 2H), 3.94 (dq,  $J = 15.3, 9.4$  Hz, 1H), 3.74 (dd,  $J = 13.1, 7.8$  Hz, 1H), 3.62 – 3.47 (m, 2H), 3.07 (s, 3H), 2.76 (dd,  $J = 16.4, 7.8$  Hz, 1H).  $^{13}\text{C}$  NMR (151 MHz,  $\text{CDCl}_3$ )  $\delta$  175.90, 173.93, 141.86, 136.46, 132.41, 128.54, 128.28, 127.73, 127.37, 124.31, 123.22, 123.21 (q,  $J = 280.9$  Hz), 103.08, 73.28, 52.24, 42.45 (q,  $J = 35.8$  Hz), 32.78, 29.25. HRMS (ESI) calculated  $[\text{M}+\text{Na}]^+$  for  $\text{C}_{20}\text{H}_{16}\text{BrF}_3\text{N}_2\text{O}_2\text{Na}$ : 475.0245, found: 475.0239.  $[\alpha]^{20}_{\text{D}} = +55$  ( $c = 0.2$ ,  $\text{CHCl}_3$ ). 94% ee as determined by HPLC (CHIRALPAK IB N-5 Column, hexane/ethanol/diethylamine

= 80/20/0.1; 1.0 ml/min, wavelength = 254 nm),  $t_R$  (minor) = 7.383 min,  $t_R$  (major) = 9.610 min.

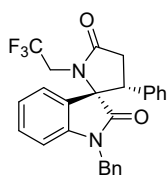

4f

**(3S, 3'R)-1-benzyl-3'-phenyl-1'-(2,2,2-trifluoroethyl)spiro[indoline-3,2'-pyrrolidine]-2,5'-dione (4f)** was synthesized according to general procedure C as a

white solid in 72% yield.  $^1\text{H NMR}$  (600 MHz,  $\text{CDCl}_3$ )  $\delta$  7.41 (dd,  $J = 7.2$  Hz, 1H), 7.31 (t,  $J = 7.4$  Hz, 1H), 7.26 – 7.22 (m, 1H), 7.23 – 7.12 (m, 4H), 7.08 (t,  $J = 7.6$  Hz,

2H), 6.96 (d,  $J = 7.2$  Hz, 2H), 6.45 (d,  $J = 7.8$  Hz, 1H), 6.38 (d,  $J = 7.6$  Hz, 2H), 4.95 (d,  $J = 16.0$  Hz, 1H), 4.17 (d,  $J = 16.0$  Hz, 1H), 4.05 (dq,  $J = 15.3, 9.6$  Hz, 1H), 3.92 (dd,  $J = 13.3, 7.8$  Hz, 1H), 3.71 (dd,  $J = 16.3, 13.3$  Hz, 1H), 3.52 – 3.42 (m, 1H), 2.79 (dd,  $J = 16.3, 7.8$  Hz, 1H).  $^{13}\text{C NMR}$  (151 MHz,  $\text{CDCl}_3$ )  $\delta$  175.93, 173.68, 143.99, 134.49, 133.07, 130.98, 128.64, 128.62, 128.42, 128.34, 127.28, 126.38, 124.26, 123.84, 123.30, 123.27 (q,  $J = 280.5$  Hz), 110.20, 73.22, 51.39, 43.81, 42.24 (q,  $J = 35.7$  Hz), 33.19. **HRMS** (ESI) calculated  $[\text{M}+\text{Na}]^+$  for  $\text{C}_{26}\text{H}_{21}\text{F}_3\text{N}_2\text{O}_2\text{Na}$ : 473.1453, found: 473.1449.  $[\alpha]_D^{20} = +82$  ( $c = 0.2$ ,  $\text{CHCl}_3$ ). 98% ee as determined by HPLC (CHIRALPAK IB N-5 Column, hexane/ethanol/diethylamine = 80/20/0.1; 1.0 ml/min, wavelength = 254 nm),  $t_R$  (minor) = 6.792 min,  $t_R$  (major) = 8.888 min.

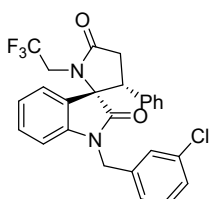

4g

**(3S, 3'R)-1-(3-chlorobenzyl)-3'-phenyl-1'-(2,2,2-trifluoroethyl)spiro[indoline-3,2'-pyrrolidine]-2,5'-dione (4g)** was synthesized according to general procedure

C as a white solid in 68% yield.  $^1\text{H NMR}$  (600 MHz,  $\text{CDCl}_3$ )  $\delta$  7.42 (d,  $J = 7.4$  Hz, 1H), 7.32 – 7.27 (m, 2H), 7.23 (t,  $J = 7.5$  Hz, 1H), 7.19 – 7.11 (m, 3H), 6.98 (t,  $J = 7.8$  Hz, 1H), 6.93 (d,  $J = 7.7$  Hz, 2H), 6.79 (d,  $J = 2.0$  Hz, 1H), 6.47 (d,  $J = 7.8$  Hz,

1H), 6.06 (d,  $J = 7.7$  Hz, 1H), 4.87 (d,  $J = 16.1$  Hz, 1H), 4.16 – 4.05 (m, 2H), 3.91 (dd,  $J = 13.3, 7.8$  Hz, 1H), 3.69 (dd,  $J = 16.3, 13.2$  Hz, 1H), 3.43 (dq,  $J = 16.8, 8.6$  Hz, 1H), 2.78 (dd,  $J = 16.3, 7.8$  Hz, 1H).  $^{13}\text{C NMR}$  (151 MHz,  $\text{CDCl}_3$ )  $\delta$  175.81, 173.80, 143.77, 136.71, 134.42, 132.83, 131.06, 130.05, 128.64, 128.54, 128.20, 127.76, 126.81, 124.58, 124.32, 123.83, 123.52, 123.23 (q,  $J = 280.9$  Hz), 109.98, 73.10, 51.47, 43.42, 42.14 (q,  $J = 36.2$  Hz), 33.12. **HRMS** (ESI) calculated  $[\text{M}+\text{Na}]^+$  for  $\text{C}_{26}\text{H}_{20}\text{ClF}_3\text{N}_2\text{O}_2\text{Na}$ : 507.1063, found: 507.1057.  $[\alpha]_D^{20} = +74$  ( $c = 0.1$ ,  $\text{CHCl}_3$ ). 99% ee as determined by HPLC (CHIRALPAK IB N-5 Column, hexane/ethanol/diethylamine = 80/20/0.1; 1.0 ml/min, wavelength = 254 nm),  $t_R$  (minor) = 7.818 min,  $t_R$  (major) = 10.700 min.

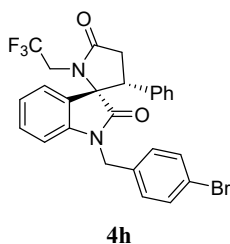

(**3S**, **3'R**)-1-(4-bromobenzyl)-3'-phenyl-1'-(2,2,2-trifluoroethyl)spiro[**indoline-3,2'-pyrrolidine**]-2,5'-dione (**4h**) was synthesized according to general

procedure C as a white solid in 72% yield. <sup>1</sup>H NMR (600 MHz, CDCl<sub>3</sub>) δ 7.42 (dd, *J* = 7.3, 1.3 Hz, 1H), 7.35 – 7.30 (m, 1H), 7.29 – 7.26 (m, 2H), 7.22 (td, *J* =

7.5, 1.1 Hz, 1H), 7.20 – 7.17 (m, 4H), 6.99 – 6.91 (m, 2H), 6.45 – 6.37 (m, 1H),

6.22 (d, *J* = 8.4 Hz, 2H), 4.93 (d, *J* = 16.1 Hz, 1H), 4.15 – 4.05 (m, 2H), 3.92 (dd, *J* = 13.3, 7.8 Hz,

1H), 3.70 (dd, *J* = 16.3, 13.3 Hz, 1H), 3.43 (dq, *J* = 15.3, 8.6 Hz, 1H), 2.79 (dd, *J* = 16.3, 7.8 Hz, 1H).

<sup>13</sup>C NMR (151 MHz, CDCl<sub>3</sub>) δ 175.79, 173.67, 143.67, 133.57, 133.04, 131.76, 131.04, 128.65,

128.43, 128.35, 128.12, 124.34, 123.80, 123.50, 123.24 (q, *J* = 280.9 Hz), 121.22, 110.01, 73.09,

51.43, 43.22, 42.15 (q, *J* = 35.1 Hz), 33.11. HRMS (ESI) calculated [M+Na]<sup>+</sup> for C<sub>26</sub>H<sub>20</sub>BrF<sub>3</sub>N<sub>2</sub>O<sub>2</sub>Na:

551.0558, found: 551.0553. [α]<sub>D</sub><sup>20</sup> = +66 (c = 0.3, CHCl<sub>3</sub>). 97% ee as determined by HPLC

(CHIRALPAK IB N-5 Column, hexane/ethanol/diethylamine = 80/20/0.1; 1.0 ml/min, wavelength =

254 nm), t<sub>R</sub> (minor) = 10.632 min, t<sub>R</sub> (major) = 12.948 min.

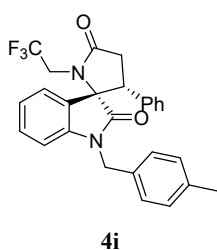

(**3S**, **3'R**)-1-(4-methylbenzyl)-3'-phenyl-1'-(2,2,2-trifluoroethyl)spiro[**indoline-3,2'-pyrrolidine**]-2,5'-dione (**4i**) was synthesized according to general procedure

C as a white solid in 65% yield. <sup>1</sup>H NMR (600 MHz, CDCl<sub>3</sub>) δ 7.40 (dd, *J* = 7.3

Hz, 1H), 7.31 (t, *J* = 7.4 Hz, 1H), 7.24 (td, *J* = 7.7, 1.3 Hz, 1H), 7.19 (t, *J* = 7.7 Hz,

3H), 6.96 (d, *J* = 7.2 Hz, 2H), 6.89 (d, *J* = 7.8 Hz, 2H), 6.45 (d, *J* = 7.5 Hz, 1H),

6.28 (d, *J* = 7.8 Hz, 2H), 4.89 (d, *J* = 15.8 Hz, 1H), 4.14 (d, *J* = 15.8 Hz, 1H), 4.03 (dq, *J* = 15.4, 9.6

Hz, 1H), 3.91 (dd, *J* = 13.2, 7.8 Hz, 1H), 3.71 (dd, *J* = 16.3, 13.3 Hz, 1H), 3.48 (dq, *J* = 15.3, 8.7 Hz,

1H), 2.79 (dd, *J* = 16.3, 7.8 Hz, 1H), 2.27 (s, 3H). <sup>13</sup>C NMR (151 MHz, CDCl<sub>3</sub>) δ 175.96, 173.63,

144.04, 136.96, 133.09, 131.42, 130.95, 129.30, 128.59, 128.40, 128.29, 126.38, 124.21, 123.84,

123.26 (q, *J* = 280.9 Hz), 123.22, 110.25, 73.24, 51.36, 43.60, 42.26 (q, *J* = 36.0 Hz), 33.21, 21.06.

HRMS (ESI) calculated [M+Na]<sup>+</sup> for C<sub>27</sub>H<sub>23</sub>F<sub>3</sub>N<sub>2</sub>O<sub>2</sub>Na: 487.1609, found: 487.1603. [α]<sub>D</sub><sup>20</sup> = +53 (c =

0.1, CHCl<sub>3</sub>). 87% ee as determined by HPLC (CHIRALPAK IB N-5 Column,

hexane/ethanol/diethylamine = 80/20/0.1; 1.0 ml/min, wavelength = 254 nm), t<sub>R</sub> (minor) = 7.547 min,

t<sub>R</sub> (major) = 10.188 min.

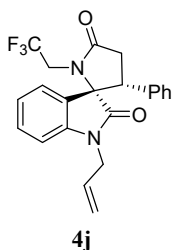

(**3S**, **3'R**)-1-allyl-3'-phenyl-1'-(2,2,2-trifluoroethyl)spiro[**indoline-3,2'-pyrrolidine**]-

**2,5'-dione (4j)** was synthesized according to general procedure C as a white solid in 71% yield.  $^1\text{H}$  NMR (600 MHz,  $\text{CDCl}_3$ )  $\delta$  7.40 (dd,  $J = 7.5, 1.2$  Hz, 1H), 7.36 (td,  $J = 7.8, 1.3$  Hz, 1H), 7.26 – 7.17 (m, 2H), 7.14 (dd,  $J = 8.4, 6.9$  Hz, 2H), 6.87 (dd,  $J = 7.3, 1.7$  Hz, 2H), 6.65 (d,  $J = 7.8$  Hz, 1H), 5.07 (dddd,  $J = 17.2, 10.4, 5.8, 4.7$  Hz, 1H), 4.84 (dd,  $J = 10.4, 1.4$  Hz, 1H), 4.46 (dd,  $J = 17.2, 1.3$  Hz, 1H), 4.20 – 4.08 (m, 1H), 4.00 (dq,  $J = 15.3, 9.5$  Hz, 1H), 3.84 (dd,  $J = 13.2, 7.8$  Hz, 1H), 3.73 – 3.60 (m, 2H), 3.52 (dq,  $J = 15.3, 8.7$  Hz, 1H), 2.75 (dd,  $J = 16.3, 7.8$  Hz, 1H).  $^{13}\text{C}$  NMR (151 MHz,  $\text{CDCl}_3$ )  $\delta$  176.03, 173.11, 143.86, 132.92, 130.83, 130.36, 128.35, 128.24, 128.14, 124.22, 123.87, 123.26 (q,  $J = 280.9$  Hz), 123.18, 117.27, 109.81, 73.46, 51.73, 42.34 (q,  $J = 35.7$  Hz), 42.12, 32.97.  $^{19}\text{F}$  NMR (565 MHz,  $\text{CDCl}_3$ )  $\delta$  -69.18 (t,  $J = 9.3$  Hz). HRMS (ESI) calculated  $[\text{M}+\text{Na}]^+$  for  $\text{C}_{22}\text{H}_{19}\text{F}_3\text{N}_2\text{O}_2\text{Na}$ : 423.1296, found: 423.1290.  $[\alpha]_D^{20} = +42$  ( $c = 0.2$ ,  $\text{CHCl}_3$ ). 93% ee as determined by HPLC (CHIRALPAK IB N-5 Column, hexane/ethanol/diethylamine = 80/20/0.1; 1.0 ml/min, wavelength = 254 nm),  $t_R$  (minor) = 7.042 min,  $t_R$  (major) = 8.073 min.

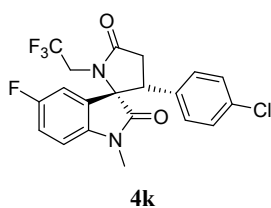

**(3S, 3'R)-3'-(4-chlorophenyl)-5-fluoro-1-methyl-1'-(2,2,2-trifluoroethyl)spiro[indoline-3,2'-pyrrolidine]-2,5'-dione (4k)** was synthesized according to general procedure C as a white solid in 70% yield.  $^1\text{H}$  NMR (600 MHz,  $\text{CDCl}_3$ )  $\delta$  7.19 – 7.09 (m, 4H), 6.86 – 6.80 (m, 2H), 6.65

(dd,  $J = 8.5, 4.0$  Hz, 1H), 3.91 (dq,  $J = 15.4, 9.4$  Hz, 1H), 3.74 (dd,  $J = 13.1, 7.9$  Hz, 1H), 3.62 – 3.48 (m, 2H), 2.78 (s, 4H).  $^{13}\text{C}$  NMR (151 MHz,  $\text{CDCl}_3$ )  $\delta$  175.44, 173.11, 159.40 (d,  $J = 243.8$  Hz), 140.35 (d,  $J = 2.2$  Hz), 134.34, 131.19, 129.27, 128.47, 125.40 (d,  $J = 7.4$  Hz), 123.17 (q,  $J = 280.2$  Hz), 117.62 (d,  $J = 23.6$  Hz), 112.28 (d,  $J = 24.9$  Hz), 109.73 (d,  $J = 8.0$  Hz), 73.55, 51.03, 42.55 (q,  $J = 35.6$  Hz), 32.98, 25.96. HRMS (ESI) calculated  $[\text{M}+\text{Na}]^+$  for  $\text{C}_{20}\text{H}_{15}\text{ClF}_4\text{N}_2\text{O}_2\text{Na}$ : 449.0656, found: 449.0649.  $[\alpha]_D^{20} = +72$  ( $c = 0.2$ ,  $\text{CHCl}_3$ ). 98% ee as determined by HPLC (CHIRALPAK IB N-5 Column, hexane/ethanol/diethylamine = 80/20/0.1; 1.0 ml/min, wavelength = 254 nm),  $t_R$  (minor) = 7.973 min,  $t_R$  (major) = 11.593 min.

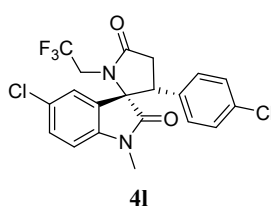

**(3S, 3'R)-5-chloro-3'-(4-chlorophenyl)-1-methyl-1'-(2,2,2-trifluoroethyl)spiro[indoline-3,2'-pyrrolidine]-2,5'-dione (4l)** was synthesized according to general procedure C as a white solid in 73% yield.  $^1\text{H}$  NMR (600 MHz,  $\text{CDCl}_3$ )  $\delta$  7.41 – 7.36 (m, 2H), 7.14 (d,  $J = 8.5$  Hz, 2H), 6.83

(d,  $J = 8.5$  Hz, 2H), 6.64 (d,  $J = 8.2$  Hz, 1H), 4.01 (dq,  $J = 15.3, 9.5$  Hz, 1H), 3.75 (dd,  $J = 13.1, 7.9$  Hz, 1H), 3.57 – 3.45 (m, 2H), 2.77 (s, 3H), 2.77 – 2.72 (m, 1H).  $^{13}\text{C}$  NMR (151 MHz,  $\text{CDCl}_3$ )  $\delta$  175.30, 172.93, 142.95, 134.38, 131.13, 131.12, 129.26, 128.87, 128.49, 125.51, 124.51, 123.14 (q,  $J = 280.9$  Hz), 109.96, 73.26, 51.09, 42.41 (q,  $J = 35.7$  Hz), 32.92, 25.93. HRMS (ESI) calculated  $[\text{M}+\text{Na}]^+$  for  $\text{C}_{20}\text{H}_{15}\text{ClF}_3\text{N}_2\text{O}_2\text{Na}$ : 465.0360, found: 465.0355.  $[\alpha]_D^{20} = +70$  ( $c = 0.1$ ,  $\text{CHCl}_3$ ). 99% ee as determined by HPLC (CHIRALPAK IB N-5 Column, hexane/ethanol/diethylamine = 80/20/0.1; 1.0 ml/min, wavelength = 254 nm),  $t_R$  (minor) = 8.172 min,  $t_R$  (major) = 10.593 min.

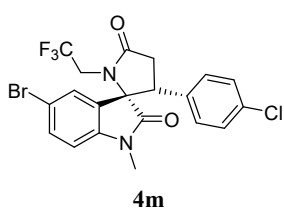

(3S, 3'R)-5-bromo-3'-(4-chlorophenyl)-1-methyl-1'-(2,2,2-trifluoroethyl)spiro[indoline-3,2'-pyrrolidine]-2,5'-dione (**4m**) was

synthesized according to general procedure C as a white solid in 82% yield.

$^1\text{H}$  NMR (600 MHz,  $\text{CDCl}_3$ )  $\delta$  7.54 (dd,  $J = 8.3, 2.0$  Hz, 1H), 7.51 (d,  $J = 2.0$  Hz, 1H), 7.17 – 7.11 (m, 2H), 6.85 – 6.80 (m, 2H), 6.59 (d,  $J = 8.3$  Hz, 1H), 4.02 (dq,  $J = 15.4, 9.5$  Hz, 1H), 3.75 (dd,  $J = 13.1, 7.9$  Hz, 1H), 3.58 – 3.43 (m, 2H), 2.80 – 2.71 (m, 4H).  $^{13}\text{C}$  NMR (151 MHz,  $\text{CDCl}_3$ )  $\delta$  175.26, 172.81, 143.45, 134.39, 134.03, 131.11, 129.26, 128.50, 127.24, 125.86, 123.14 (q,  $J = 280.9$  Hz), 115.91, 110.41, 73.18, 51.11, 42.39 (q,  $J = 35.7$  Hz), 32.90, 25.90. HRMS (ESI) calculated  $[\text{M}+\text{Na}]^+$  for  $\text{C}_{20}\text{H}_{15}\text{BrClF}_3\text{N}_2\text{O}_2\text{Na}$ : 508.9855, found: 508.9849.  $[\alpha]_D^{20} = +56$  ( $c = 0.2$ ,  $\text{CHCl}_3$ ). 90% ee as determined by HPLC (CHIRALPAK IB N-5 Column, hexane/ethanol/diethylamine = 80/20/0.1; 1.0 ml/min, wavelength = 254 nm),  $t_R$  (minor) = 7.722 min,  $t_R$  (major) = 11.015 min.

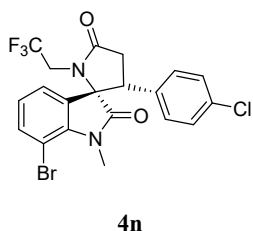

(3S, 3'R)-7-bromo-3'-(4-chlorophenyl)-1-methyl-1'-(2,2,2-trifluoroethyl)spiro[indoline-3,2'-pyrrolidine]-2,5'-dione (**4n**) was

synthesized according to general procedure C as a white solid in 72% yield.  $^1\text{H}$

NMR (600 MHz,  $\text{CDCl}_3$ )  $\delta$  7.53 (dd,  $J = 8.2, 1.1$  Hz, 1H), 7.31 (dd,  $J = 7.3, 1.2$  Hz, 1H), 7.19 – 7.14 (m, 2H), 7.09 (dd,  $J = 8.2, 7.3$  Hz, 1H), 6.79 (d,  $J = 8.5$  Hz, 2H), 3.95 (dq,  $J = 15.4, 9.4$  Hz, 1H), 3.72 (dd,  $J = 13.1, 7.9$  Hz, 1H), 3.56 – 3.45 (m, 2H), 3.15 (s, 3H), 2.75 (dd,  $J = 16.4, 7.9$  Hz, 1H).  $^{13}\text{C}$  NMR (151 MHz,  $\text{CDCl}_3$ )  $\delta$  175.43, 173.84, 141.84, 136.71, 134.45, 131.08, 129.17, 128.53, 127.02, 124.46, 123.20, 123.16 (q,  $J = 279.4$  Hz), 103.28, 72.88, 51.44, 42.39 (q,  $J = 35.6$  Hz), 32.96, 29.39.  $^{19}\text{F}$  NMR (565 MHz,  $\text{CDCl}_3$ )  $\delta$  -69.15 (t,  $J = 9.0$  Hz). HRMS (ESI) calculated  $[\text{M}+\text{Na}]^+$  for  $\text{C}_{20}\text{H}_{15}\text{BrClF}_3\text{N}_2\text{O}_2\text{Na}$ : 508.9855, found: 508.9847.  $[\alpha]_D^{20} = +63$  ( $c = 0.3$ ,  $\text{CHCl}_3$ ). 95% ee as



determined by HPLC (CHIRALPAK IB N-5 Column, hexane/ethanol/diethylamine = 80/20/0.1; 1.0 ml/min, wavelength = 254 nm),  $t_R$  (minor) = 8.315 min,  $t_R$  (major) = 11.838 min.

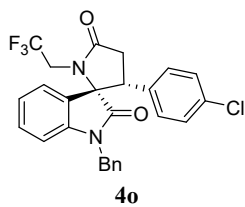

4o

(3S, 3'R)-1-benzyl-3'-(4-chlorophenyl)-1'-(2,2,2-trifluoroethyl)spiro[indoline-3,2'-pyrrolidine]-2,5'-dione (4o) was synthesized according to general procedure C as a white solid in 73% yield.  $^1\text{H NMR}$  (600 MHz,  $\text{CDCl}_3$ )

$\delta$  7.40 (dd,  $J = 6.8$  Hz, 1H), 7.30 – 7.26 (m, 1H), 7.23 – 7.17 (m, 4H), 7.16 – 7.12 (m, 2H), 6.90 – 6.85 (m, 2H), 6.52 (d,  $J = 7.8$  Hz, 1H), 6.48 – 6.41 (m, 2H), 5.01 (d,  $J = 15.9$  Hz, 1H), 4.16 (d,  $J = 15.9$  Hz, 1H), 4.05 (dq,  $J = 15.4, 9.6$  Hz, 1H), 3.88 (dd,  $J = 13.2, 7.8$  Hz, 1H), 3.65 (dd,  $J = 16.3, 13.2$  Hz, 1H), 3.45 (dq,  $J = 15.3, 8.6$  Hz, 1H), 2.78 (dd,  $J = 16.2, 7.8$  Hz, 1H).  $^{13}\text{C NMR}$  (151 MHz,  $\text{CDCl}_3$ )  $\delta$  175.49, 173.51, 144.00, 134.39, 134.37, 131.66, 131.18, 129.76, 128.80, 128.69, 127.56, 126.41, 124.23, 123.53, 123.44, 123.22 (q,  $J = 280.9$  Hz), 110.26, 72.94, 50.68, 43.93, 42.23 (q,  $J = 36.2$  Hz), 33.18. HRMS (ESI) calculated  $[\text{M}+\text{Na}]^+$  for  $\text{C}_{26}\text{H}_{20}\text{ClF}_3\text{N}_2\text{O}_2\text{Na}$ : 507.1063, found: 507.1051.  $[\alpha]_D^{20} = +88$  ( $c = 0.1$ ,  $\text{CHCl}_3$ ). 98% ee as determined by HPLC (CHIRALPAK IB N-5 Column, hexane/ethanol/diethylamine = 80/20/0.1; 1.0 ml/min, wavelength = 254 nm),  $t_R$  (minor) = 9.132 min,  $t_R$  (major) = 11.498 min.

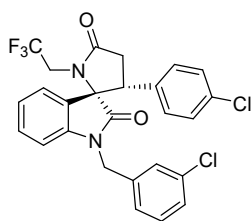

4p

(3S, 3'R)-1-(3-chlorobenzyl)-3'-(4-chlorophenyl)-1'-(2,2,2-trifluoroethyl)spiro[indoline-3,2'-pyrrolidine]-2,5'-dione (4p) was

synthesized according to general procedure C as a white solid in 75% yield.  $^1\text{H NMR}$  (600 MHz,  $\text{CDCl}_3$ )  $\delta$  7.40 (dd,  $J = 7.5, 1.3$  Hz, 1H), 7.32 (td,  $J = 7.8, 1.3$  Hz, 1H), 7.24 (td,  $J = 7.6, 1.0$  Hz, 1H), 7.21 – 7.18 (m, 1H), 7.15 – 7.10 (m, 2H), 7.08 (t,  $J = 7.8$  Hz, 1H), 6.98 (t,  $J = 2.0$  Hz, 1H), 6.88 – 6.81 (m, 2H), 6.54 (dt,  $J = 7.9, 0.7$  Hz, 1H), 6.01 (ddd,  $J = 7.7, 1.8, 0.9$  Hz, 1H), 4.93 – 4.88 (m, 1H), 4.15 (d,  $J = 16.0$  Hz, 1H), 4.09 (dq,  $J = 15.4, 9.6$  Hz, 1H), 3.87 (dd,  $J = 13.2, 7.8$  Hz, 1H), 3.63 (dd,  $J = 16.3, 13.2$  Hz, 1H), 3.42 (dq,  $J = 15.3, 8.6$  Hz, 1H), 2.77 (ddd,  $J = 16.3, 7.8, 0.7$  Hz, 1H).  $^{13}\text{C NMR}$  (151 MHz,  $\text{CDCl}_3$ )  $\delta$  175.39, 173.58, 143.70, 136.54, 134.46, 134.42, 131.52, 131.28, 130.10, 129.63, 128.77, 127.96, 127.13, 124.35, 124.33, 123.67, 123.54, 123.20 (q,  $J = 280.9$  Hz), 110.05, 72.83, 50.75, 43.43, 42.15 (q,  $J = 36.2$  Hz), 33.18. HRMS (ESI) calculated  $[\text{M}+\text{Na}]^+$  for  $\text{C}_{26}\text{H}_{19}\text{Cl}_2\text{F}_3\text{N}_2\text{O}_2\text{Na}$ : 541.0673, found: 541.0668.  $[\alpha]_D^{20} = +60$  ( $c = 0.1$ ,  $\text{CHCl}_3$ ). 94% ee as determined by HPLC (CHIRALPAK IB N-5 Column,

hexane/ethanol/diethylamine = 80/20/0.1; 1.0 ml/min, wavelength = 254 nm),  $t_R$  (minor) = 10.147 min,  $t_R$  (major) = 12.530 min.

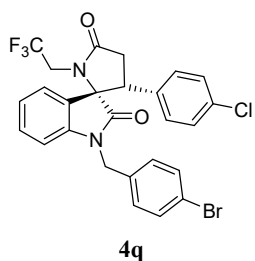

4q

(3*S*, 3'*R*)-1-(4-bromobenzyl)-3'-(4-chlorophenyl)-1'-(2,2,2-trifluoroethyl)spiro[indoline-3,2'-pyrrolidine]-2,5'-dione (4q) was

synthesized according to general procedure C as a white solid in 68% yield.  $^1\text{H}$  NMR (600 MHz,  $\text{CDCl}_3$ )  $\delta$  7.40 (dd,  $J = 7.5$ , 1.3 Hz, 1H), 7.34 – 7.27 (m, 3H),

7.23 (td,  $J = 7.6$ , 1.0 Hz, 1H), 7.18 – 7.12 (m, 2H), 6.89 – 6.83 (m, 2H), 6.48 (d,

$J = 7.8$  Hz, 1H), 6.32 (d,  $J = 8.3$  Hz, 2H), 4.94 (d,  $J = 16.0$  Hz, 1H), 4.10 (dd,  $J = 15.7$ , 10.6 Hz, 2H),

3.87 (dd,  $J = 13.2$ , 7.8 Hz, 1H), 3.64 (dd,  $J = 16.3$ , 13.2 Hz, 1H), 3.41 (dt,  $J = 15.3$ , 8.5 Hz, 1H), 2.78

(dd,  $J = 16.2$ , 7.8 Hz, 1H).  $^{13}\text{C}$  NMR (151 MHz,  $\text{CDCl}_3$ )  $\delta$  175.39, 173.52, 143.69, 134.50, 133.44,

131.86, 131.61, 131.25, 129.74, 128.79, 128.16, 124.32, 123.65, 123.48, 123.20 (q,  $J = 279.4$  Hz),

121.55, 110.06, 72.86, 50.77, 43.35, 42.15 (q,  $J = 35.6$  Hz), 33.06. HRMS (ESI) calculated  $[\text{M}+\text{Na}]^+$

for  $\text{C}_{26}\text{H}_{19}\text{BrClF}_3\text{N}_2\text{O}_2\text{Na}$ : 585.0168, found: 585.0162.  $[\alpha]_D^{20} = +59$  ( $c = 0.1$ ,  $\text{CHCl}_3$ ). 94% ee as

determined by HPLC (CHIRALPAK IB N-5 Column, hexane/ethanol/diethylamine = 80/20/0.1, 1.0 ml/min, wavelength = 254 nm),  $t_R$  (minor) = 11.280 min,  $t_R$  (major) = 13.492 min.

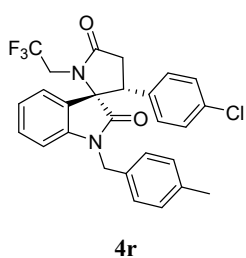

4r

(3*S*, 3'*R*)-3'-(4-chlorophenyl)-1-(4-methylbenzyl)-1'-(2,2,2-trifluoroethyl)spiro[indoline-3,2'-pyrrolidine]-2,5'-dione (4r) was

synthesized according to general procedure C as a white solid in 73% yield.  $^1\text{H}$  NMR (600 MHz,  $\text{CDCl}_3$ )  $\delta$  7.39 (dd,  $J = 7.4$ , 1.3 Hz, 1H), 7.30 – 7.26 (m, 1H),

7.19 (td,  $J = 7.6$ , 1.0 Hz, 1H), 7.15 – 7.08 (m, 2H), 6.99 (d,  $J = 7.8$  Hz, 2H), 6.86

(d,  $J = 8.5$  Hz, 2H), 6.54 (d,  $J = 7.8$  Hz, 1H), 6.37 (d,  $J = 7.9$  Hz, 2H), 4.94 (d,  $J = 15.8$  Hz, 1H), 4.13

(d,  $J = 15.7$  Hz, 1H), 4.02 (dq,  $J = 15.4$ , 9.5 Hz, 1H), 3.87 (dd,  $J = 13.2$ , 7.8 Hz, 1H), 3.64 (dd,  $J =$

16.3, 13.2 Hz, 1H), 3.46 (dq,  $J = 15.3$ , 8.6 Hz, 1H), 2.77 (dd,  $J = 16.3$ , 7.8 Hz, 1H), 2.29 (s, 3H).  $^{13}\text{C}$  NMR (151 MHz,  $\text{CDCl}_3$ )  $\delta$  175.54, 173.45, 144.06, 137.28, 134.40, 131.65, 131.33, 131.17, 129.72,

129.37, 128.75, 126.46, 124.21, 123.54, 123.36, 123.22 (q,  $J = 280.9$  Hz), 110.25, 72.94, 50.65, 43.69,

42.25 (q,  $J = 35.7$  Hz), 33.18, 21.10. HRMS (ESI) calculated  $[\text{M}+\text{Na}]^+$  for

$\text{C}_{27}\text{H}_{22}\text{ClF}_3\text{N}_2\text{O}_2\text{Na}$ : 521.1220, found: 521.1215.  $[\alpha]_D^{20} = +90$  ( $c = 0.5$ ,  $\text{CHCl}_3$ ). 93% ee as determined

by HPLC (CHIRALPAK IB N-5 Column, hexane/ethanol/diethylamine = 80/20/0.1; 1.0 ml/min,

wavelength = 254 nm),  $t_R$  (minor) = 9.320 min,  $t_R$  (major) = 11.143 min.

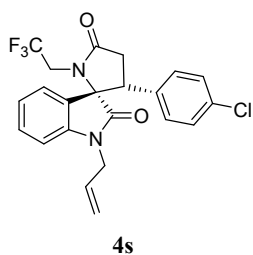

**(3S, 3'R)-1-allyl-3'-(4-chlorophenyl)-1'-(2,2,2-trifluoroethyl)spiro[indoline-3,2'-pyrrolidine]-2,5'-dione (4s)** was synthesized according to general procedure C as a white solid in 60% yield.  $^1\text{H NMR}$  (600 MHz,  $\text{CDCl}_3$ )  $\delta$  7.41 – 7.29 (m, 2H), 7.23 (td,  $J = 7.6, 1.0$  Hz, 1H), 7.15 – 7.08 (m, 2H), 6.80 (d,  $J = 8.5$  Hz, 2H), 6.68 (d,  $J = 7.8$  Hz, 1H), 5.17 (ddt,  $J = 17.2, 10.5, 5.3$  Hz, 1H), 4.93

(dq,  $J = 10.3, 1.4$  Hz, 1H), 4.50 (dq,  $J = 17.1, 1.6$  Hz, 1H), 4.17 (ddt,  $J = 16.4, 5.0, 1.8$  Hz, 1H), 4.00 (dq,  $J = 15.3, 9.5$  Hz, 1H), 3.80 (dd,  $J = 13.2, 7.8$  Hz, 1H), 3.73 (ddt,  $J = 16.4, 5.6, 1.6$  Hz, 1H), 3.57 (dd,  $J = 16.3, 13.2$  Hz, 1H), 3.50 (dq,  $J = 15.3, 8.7$  Hz, 1H), 2.75 (dd,  $J = 16.3, 7.8$  Hz, 1H).  $^{13}\text{C NMR}$  (151 MHz,  $\text{CDCl}_3$ )  $\delta$  175.61, 172.97, 143.79, 134.33, 131.46, 131.04, 130.14, 129.49, 128.50, 124.20, 123.56, 123.34, 123.22 (q,  $J = 280.9$  Hz), 117.39, 109.90, 73.24, 51.12, 42.34 (d,  $J = 35.6$  Hz), 42.13, 32.94. **HRMS** (ESI) calculated  $[\text{M}+\text{Na}]^+$  for  $\text{C}_{22}\text{H}_{18}\text{ClF}_3\text{N}_2\text{O}_2\text{Na}$ : 457.0907, found: 457.0900.  $[\alpha]^{20}_{\text{D}} = +72$  ( $c = 0.4$ ,  $\text{CHCl}_3$ ). 90% ee as determined by HPLC (CHIRALPAK IB N-5 Column, hexane/ethanol/diethylamine = 80/20/0.1; 1.0 ml/min, wavelength = 254 nm),  $t_R$  (minor) = 7.958 min,  $t_R$  (major) = 10.122 min.

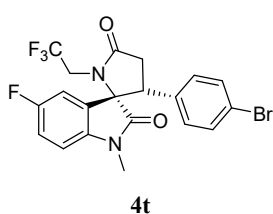

**(3S, 3'R)-3'-(4-bromophenyl)-5-fluoro-1-methyl-1'-(2,2,2-trifluoroethyl)spiro[indoline-3,2'-pyrrolidine]-2,5'-dione (4t)** was synthesized according to general procedure C as a white solid in 69% yield.  $^1\text{H NMR}$  (600 MHz,  $\text{CDCl}_3$ )  $\delta$  7.30 – 7.27 (m, 2H), 7.17 – 7.09 (m, 2H), 6.79 – 6.74 (m, 2H), 6.65 (dd,  $J = 8.5, 4.0$  Hz, 1H), 3.91 (dq,  $J = 15.4, 9.4$  Hz, 1H), 3.73 (dd,  $J = 13.1, 7.9$  Hz, 1H), 3.61 – 3.48 (m, 2H), 2.79 (s, 3H), 2.78 – 2.74 (m, 1H).  $^{13}\text{C NMR}$  (151 MHz,  $\text{CDCl}_3$ )  $\delta$  175.40, 173.09, 159.40 (d,  $J = 244.0$  Hz), 140.34 (d,  $J = 2.2$  Hz), 131.72, 131.43, 129.59, 125.37 (d,  $J = 7.4$  Hz), 123.16 (q,  $J = 280.4$  Hz), 122.51, 117.63 (d,  $J = 23.6$  Hz), 112.27 (d,  $J = 24.9$  Hz), 109.76 (d,  $J = 7.9$  Hz), 73.47, 51.08, 42.54 (q,  $J = 35.8$  Hz), 32.93, 25.98. **HRMS** (ESI) calculated  $[\text{M}+\text{Na}]^+$  for  $\text{C}_{20}\text{H}_{15}\text{BrF}_4\text{N}_2\text{O}_2\text{Na}$ : 493.0151, found: 493.0146.  $[\alpha]^{20}_{\text{D}} = +83$  ( $c = 0.5$ ,  $\text{CHCl}_3$ ). 97% ee as determined by HPLC (CHIRALPAK IB N-5 Column, hexane/ethanol/diethylamine = 80/20/0.1; 1.0 ml/min, wavelength = 254 nm),  $t_R$  (minor) = 7.967 min,  $t_R$  (major) = 11.772 min.

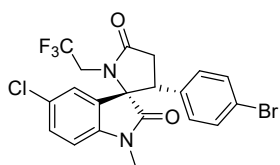

4u

(3S, 3'R)-3'-(4-bromophenyl)-5-chloro-1-methyl-1'-(2,2,2-trifluoroethyl)spiro[indoline-3,2'-pyrrolidine]-2,5'-dione (4u) was synthesized according to general procedure C as a white solid in 78% yield.

<sup>1</sup>H NMR (600 MHz, CDCl<sub>3</sub>) δ 7.42 – 7.36 (m, 2H), 7.31 – 7.28 (m, 2H), 6.77 (d, *J* = 8.5 Hz, 2H), 6.64 (d, *J* = 8.2 Hz, 1H), 4.01 (dq, *J* = 15.4, 9.5 Hz, 1H), 3.74 (dd, *J* = 13.1, 7.9 Hz, 1H), 3.57 – 3.43 (m, 2H), 2.78 (s, 3H), 2.75 (dd, *J* = 16.6, 8.2 Hz, 1H). <sup>13</sup>C NMR (151 MHz, CDCl<sub>3</sub>) δ 175.27, 172.92, 142.95, 131.65, 131.45, 131.15, 129.59, 128.88, 125.49, 124.51, 123.14 (q, *J* = 280.3 Hz), 122.55, 109.99, 73.18, 51.13, 42.40 (q, *J* = 35.7 Hz), 32.87, 25.95. HRMS (ESI) calculated [M+Na]<sup>+</sup> for C<sub>20</sub>H<sub>15</sub>BrClF<sub>3</sub>N<sub>2</sub>O<sub>2</sub>Na: 508.9855, found: 508.9849. [α]<sub>D</sub><sup>20</sup> = +80 (c = 0.4, CHCl<sub>3</sub>). 95% ee as determined by HPLC (CHIRALPAK IB N-5 Column, hexane/ethanol/diethylamine = 80/20/0.1; 1.0 ml/min, wavelength = 254 nm), t<sub>R</sub> (minor) = 7.658 min, t<sub>R</sub> (major) = 10.988 min.

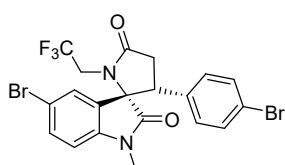

4v

(3S, 3'R)-5-bromo-3'-(4-bromophenyl)-1-methyl-1'-(2,2,2-trifluoroethyl)spiro[indoline-3,2'-pyrrolidine]-2,5'-dione (4v) was synthesized according to general procedure C as a white solid in 79% yield.

<sup>1</sup>H NMR (600 MHz, CDCl<sub>3</sub>) δ 7.54 (dd, *J* = 8.3, 2.0 Hz, 1H), 7.51 (d, *J* = 2.0 Hz, 1H), 7.31 – 7.28 (m, 2H), 6.80 – 6.74 (m, 2H), 6.60 (d, *J* = 8.3 Hz, 1H), 4.02 (dq, *J* = 15.4, 9.5 Hz, 1H), 3.74 (dd, *J* = 13.1, 7.9 Hz, 1H), 3.58 – 3.43 (m, 2H), 2.79 – 2.72 (m, 4H). <sup>13</sup>C NMR (151 MHz, CDCl<sub>3</sub>) δ 175.25, 172.80, 143.44, 134.04, 131.63, 131.46, 129.58, 127.24, 125.83, 123.13 (q, *J* = 280.9 Hz), 122.56, 115.93, 110.44, 73.10, 51.15, 42.39 (q, *J* = 35.6 Hz), 32.85, 25.92. HRMS (ESI) calculated [M+Na]<sup>+</sup> for C<sub>20</sub>H<sub>15</sub>Br<sub>2</sub>F<sub>3</sub>N<sub>2</sub>O<sub>2</sub>Na: 552.9350, found: 552.9342. [α]<sub>D</sub><sup>20</sup> = +58 (c = 0.4, CHCl<sub>3</sub>) 90% ee as determined by HPLC (CHIRALPAK IB N-5 Column, hexane/ethanol/diethylamine = 80/20/0.1; 1.0 ml/min, wavelength = 254 nm), t<sub>R</sub> (minor) = 8.782 min, t<sub>R</sub> (major) = 12.662 min.

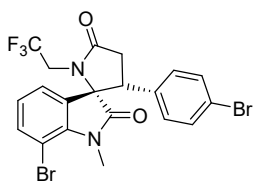

4w

(3S, 3'R)-7-bromo-3'-(4-bromophenyl)-1-methyl-1'-(2,2,2-trifluoroethyl)spiro[indoline-3,2'-pyrrolidine]-2,5'-dione (4w) was synthesized according to general procedure C as a white solid in 68% yield. <sup>1</sup>H

NMR (600 MHz, CDCl<sub>3</sub>) δ 7.53 (dd, *J* = 8.2, 1.2 Hz, 1H), 7.34 – 7.28 (m, 3H), 7.09 (dd, *J* = 8.2, 7.3 Hz, 1H), 6.73 (d, *J* = 8.5 Hz, 2H), 3.94 (dq, *J* = 15.4, 9.4 Hz, 1H), 3.70 (dd, *J* = 13.1, 7.9 Hz, 1H), 3.56 – 3.44 (m, 2H), 3.15 (s, 3H), 2.75 (dd, *J* = 16.3, 7.9 Hz, 1H). <sup>13</sup>C NMR (151

**MHz, CDCl<sub>3</sub>)**  $\delta$  175.41, 173.83, 141.84, 136.72, 131.62, 131.50, 129.50, 127.00, 124.47, 123.21, 123.15 (q,  $J$  = 280.9 Hz), 122.63, 103.31, 72.79, 51.48, 42.39 (q,  $J$  = 35.5 Hz), 32.92, 29.41. **HRMS** (ESI) calculated  $[M+Na]^+$  for C<sub>20</sub>H<sub>15</sub>Br<sub>2</sub>F<sub>3</sub>N<sub>2</sub>O<sub>2</sub>Na: 552.9350, found: 552.9345.  $[\alpha]^{20}_D$  = +61 (c = 0.3, CHCl<sub>3</sub>) 99% ee as determined by HPLC (CHIRALPAK IB N-5 Column, hexane/ethanol/diethylamine = 80/20/0.1; 1.0 ml/min, wavelength = 254 nm),  $t_R$  (major) = 8.377 min,  $t_R$  (minor) = 12.160 min.

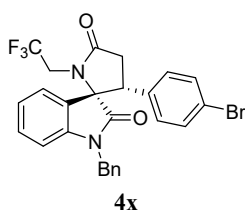

**(3S, 3'R)-1-benzyl-3'-(4-bromophenyl)-1'-(2,2,2-trifluoroethyl)spiro[indoline-3,2'-pyrrolidine]-2,5'-dione (4x)** was

synthesized according to general procedure C as a white solid in 70% yield. **<sup>1</sup>H NMR (600 MHz, CDCl<sub>3</sub>)**  $\delta$  7.40 (dd,  $J$  = 7.3 Hz, 1H), 7.31 – 7.27 (m, 3H), 7.24

– 7.15 (m, 4H), 6.82 (d,  $J$  = 8.5 Hz, 2H), 6.52 (d,  $J$  = 7.9 Hz, 1H), 6.48 – 6.43 (m, 2H), 5.02 (d,  $J$  = 16.0 Hz, 1H), 4.16 (d,  $J$  = 15.9 Hz, 1H), 4.05 (dq,  $J$  = 15.4, 9.6 Hz, 1H), 3.86 (dd,  $J$  = 13.2, 7.8 Hz, 1H), 3.64 (dd,  $J$  = 16.3, 13.2 Hz, 1H), 3.45 (dq,  $J$  = 15.3, 8.6 Hz, 1H), 2.78 (dd,  $J$  = 16.2, 7.8 Hz, 1H). **<sup>13</sup>C NMR (151 MHz, CDCl<sub>3</sub>)**  $\delta$  175.47, 173.52, 144.00, 134.36, 132.20, 131.75, 131.19, 130.09, 128.78, 127.57, 126.41, 124.23, 123.51, 123.44, 123.22 (q,  $J$  = 279.4 Hz), 122.57, 110.29, 72.85, 50.73, 43.96, 42.22 (q,  $J$  = 36.2 Hz), 33.15. **HRMS** (ESI) calculated  $[M+Na]^+$  for C<sub>26</sub>H<sub>20</sub>BrF<sub>3</sub>N<sub>2</sub>O<sub>2</sub>Na: 551.0558, found: 551.0551.  $[\alpha]^{20}_D$  = +55 (c = 0.5, CHCl<sub>3</sub>). 85% ee as determined by HPLC (CHIRALPAK IB N-5 Column, hexane/ethanol/diethylamine = 80/20/0.1; 1.0 ml/min, wavelength = 254 nm),  $t_R$  (minor) = 10.115 min,  $t_R$  (major) = 13.047 min.

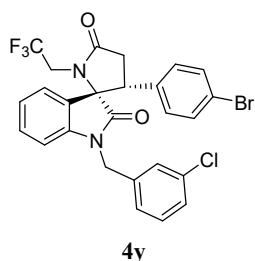

**(3S, 3'R)-3'-(4-bromophenyl)-1-(3-chlorobenzyl)-1'-(2,2,2-trifluoroethyl)spiro[indoline-3,2'-pyrrolidine]-2,5'-dione (4y)** was

synthesized according to general procedure C as a white solid in 66% yield. **<sup>1</sup>H NMR (700 MHz, CDCl<sub>3</sub>)**  $\delta$  7.40 (dd,  $J$  = 7.4, 1.2 Hz, 1H), 7.32 (td,  $J$  = 7.8, 1.3 Hz, 1H), 7.28 (d,  $J$  = 8.5 Hz, 2H), 7.25 – 7.19 (m, 2H), 7.11 (t,  $J$  = 7.9 Hz, 1H),

7.01 (t,  $J$  = 1.9 Hz, 1H), 6.82 – 6.77 (m, 2H), 6.54 (d,  $J$  = 7.9 Hz, 1H), 6.03 – 5.99 (m, 1H), 4.91 (d,  $J$  = 16.0 Hz, 1H), 4.16 (d,  $J$  = 16.0 Hz, 1H), 4.08 (dq,  $J$  = 15.4, 9.6 Hz, 1H), 3.85 (dd,  $J$  = 13.2, 7.8 Hz, 1H), 3.62 (dd,  $J$  = 16.3, 13.2 Hz, 1H), 3.46 – 3.38 (m, 1H), 2.77 (dd,  $J$  = 16.3, 7.8 Hz, 1H). **<sup>13</sup>C NMR (176 MHz, CDCl<sub>3</sub>)**  $\delta$  175.34, 173.59, 143.73, 136.55, 134.47, 132.10, 131.73, 131.30, 130.24, 129.97,

127.97, 127.19, 124.35, 124.33, 123.69, 123.56, 123.22 (q,  $J = 279.8$  Hz), 122.64, 110.07, 72.76, 50.82, 43.47, 42.17 (q,  $J = 35.6$  Hz), 33.16. **HRMS** (ESI) calculated  $[M+Na]^+$  for  $C_{26}H_{19}BrClF_3N_2O_2Na$ : 585.0168, found: 585.0158.  $[\alpha]_D^{20} = +81$  ( $c = 0.5$ ,  $CHCl_3$ ). 96% ee as determined by HPLC (CHIRALPAK IB N-5 Column, hexane/ethanol/diethylamine = 80/20/0.1; 1.0 ml/min, wavelength = 254 nm),  $t_R$  (minor) = 11.190 min,  $t_R$  (major) = 14.158 min.

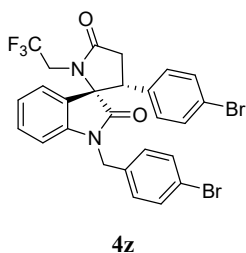

(**3S**, **3'R**)-3'-(4-bromophenyl)-1-(4-methylbenzyl)-1'-(2,2,2-trifluoroethyl)spiro[indoline-3,2'-pyrrolidine]-2,5'-dione (**4z**) was

synthesized according to general procedure C as a white solid in 75% yield. **<sup>1</sup>H NMR (600 MHz, CDCl<sub>3</sub>)**  $\delta$  7.39 (dd,  $J = 7.3, 1.3$  Hz, 1H), 7.31 – 7.26 (m, 3H), 7.20 (td,  $J = 7.6, 1.0$  Hz, 1H), 7.02 (d,  $J = 7.9$  Hz, 2H), 6.81 (d,  $J = 8.5$  Hz, 2H),

6.54 (d,  $J = 7.7$  Hz, 1H), 6.37 (d,  $J = 7.8$  Hz, 2H), 4.96 (d,  $J = 15.8$  Hz, 1H), 4.13 (d,  $J = 15.7$  Hz, 1H), 4.02 (dq,  $J = 15.3, 9.5$  Hz, 1H), 3.86 (dd,  $J = 13.2, 7.8$  Hz, 1H), 3.64 (dd,  $J = 16.3, 13.3$  Hz, 1H), 3.46 (dq,  $J = 15.3, 8.6$  Hz, 1H), 2.77 (dd,  $J = 16.2, 7.8$  Hz, 1H), 2.30 (s, 3H). **<sup>13</sup>C NMR (151 MHz, CDCl<sub>3</sub>)**  $\delta$  175.51, 173.46, 144.06, 137.27, 132.19, 131.71, 131.31, 131.18, 130.06, 129.45, 126.44, 124.21, 123.51, 123.37, 123.22 (q,  $J = 280.5$  Hz), 122.60, 110.28, 72.85, 50.70, 43.71, 42.24 (q,  $J = 35.6$  Hz), 33.16, 21.11. **HRMS** (ESI) calculated  $[M+Na]^+$  for  $C_{27}H_{22}BrF_3N_2O_2Na$ : 565.0714, found: 565.0709.  $[\alpha]_D^{20} = +77$  ( $c = 0.4$ ,  $CHCl_3$ ). 93% ee as determined by HPLC (CHIRALPAK IB N-5 Column, hexane/ethanol/diethylamine = 80/20/0.1, 1.0 ml/min, wavelength = 254 nm),  $t_R$  (minor) = 11.818 min,  $t_R$  (major) = 14.485 min.

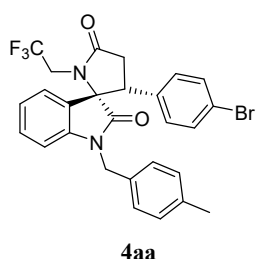

(**3S**, **3'R**)-1-(4-bromobenzyl)-3'-(4-bromophenyl)-1'-(2,2,2-trifluoroethyl)spiro[indoline-3,2'-pyrrolidine]-2,5'-dione (**4aa**) was

synthesized according to general procedure C as a white solid in 67% yield. **<sup>1</sup>H NMR (700 MHz, CDCl<sub>3</sub>)**  $\delta$  7.40 (dd,  $J = 7.4, 1.3$  Hz, 1H), 7.37 – 7.33 (m, 2H), 7.32 – 7.28 (m, 3H), 7.23 (td,  $J = 7.5, 1.0$  Hz, 1H), 6.80 (d,  $J = 8.4$  Hz, 2H),

6.48 (d,  $J = 7.8$  Hz, 1H), 6.32 (d,  $J = 8.2$  Hz, 2H), 4.95 (d,  $J = 16.1$  Hz, 1H), 4.13 – 4.04 (m, 2H), 3.86 (dd,  $J = 13.2, 7.8$  Hz, 1H), 3.63 (dd,  $J = 16.3, 13.2$  Hz, 1H), 3.42 (dq,  $J = 16.7, 8.6$  Hz, 1H), 2.77 (dd,  $J = 16.3, 7.8$  Hz, 1H). **<sup>13</sup>C NMR (176 MHz, CDCl<sub>3</sub>)**  $\delta$  175.35, 173.54, 143.73, 133.45, 132.18, 131.96, 131.77, 131.26, 130.08, 128.15, 124.34, 123.66, 123.50, 123.21 (d,  $J = 281.3$  Hz), 122.68, 121.57,

110.09, 72.80, 50.83, 43.39, 42.18 (q,  $J = 35.8$  Hz), 33.05. **HRMS** (ESI) calculated  $[M+Na]^+$  for  $C_{26}H_{19}Br_2F_3N_2O_2Na$ : 628.9663, found: 628.9652.  $[\alpha]^{20}_D = +63$  ( $c = 0.3$ ,  $CHCl_3$ ) 94% ee as determined by HPLC (CHIRALPAK IB N-5 Column, hexane/ethanol/diethylamine = 80/20/0.1; 1.0 ml/min, wavelength = 254 nm),  $t_R$  (minor) = 10.040 min,  $t_R$  (major) = 12.255 min.

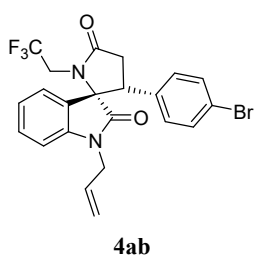

**(3S, 3'R)-1-allyl-3'-(4-bromophenyl)-1'-(2,2,2-trifluoroethyl)spiro[indoline-3,2'-pyrrolidine]-2,5'-dione (4ab)** was synthesized according to general procedure C as a white solid in 65% yield.  **$^1H$  NMR (600 MHz,  $CDCl_3$ )**  $\delta$  7.38 (ddd,  $J = 9.1, 7.6, 1.3$  Hz, 2H), 7.29 – 7.25 (m, 2H), 7.23 (td,  $J = 7.5, 0.9$  Hz, 1H), 6.74 (d,  $J = 8.5$  Hz, 2H), 6.68 (dd,  $J = 7.7, 1.1$  Hz, 1H), 5.16 (ddt,  $J = 17.2,$

10.4, 5.3 Hz, 1H), 4.94 (dd,  $J = 10.4, 1.4$  Hz, 1H), 4.49 (dd,  $J = 17.2, 1.3$  Hz, 1H), 4.18 (ddt,  $J = 16.5,$  5.0, 1.8 Hz, 1H), 4.00 (dq,  $J = 15.3, 9.5$  Hz, 1H), 3.78 (dd,  $J = 13.2, 7.8$  Hz, 1H), 3.73 (ddt,  $J = 16.4,$  5.6, 1.6 Hz, 1H), 3.57 (dd,  $J = 16.3, 13.2$  Hz, 1H), 3.50 (dq,  $J = 15.2, 8.7$  Hz, 1H), 2.75 (dd,  $J = 16.3,$  7.8 Hz, 1H).  **$^{13}C$  NMR (151 MHz,  $CDCl_3$ )**  $\delta$  175.58, 172.94, 143.78, 131.97, 131.46, 131.05, 130.11, 129.81, 124.20, 123.52, 123.35, 123.20 (q,  $J = 279.4$  Hz), 122.46, 117.40, 109.90, 73.17, 51.18, 42.33 (q,  $J = 35.7$  Hz), 42.12, 32.86. **HRMS** (ESI) calculated  $[M+Na]^+$  for  $C_{22}H_{18}BrF_3N_2O_2Na$ : 501.0402, found: 501.0399.  $[\alpha]^{20}_D = +45$  ( $c = 0.5$ ,  $CHCl_3$ ). 96% ee as determined by HPLC (CHIRALPAK IB N-5 Column, hexane/ethanol/diethylamine = 80/20/0.1; 1.0 ml/min, wavelength = 254 nm),  $t_R$  (minor) = 8.270 min,  $t_R$  (major) = 11.155 min.

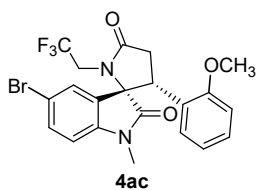

**(3S, 3'R)-5-bromo-3'-(2-methoxyphenyl)-1-methyl-1'-(2,2,2-trifluoroethyl)spiro[indoline-3,2'-pyrrolidine]-2,5'-dione (4ac)** was synthesized according to general procedure C as a white solid in 68% yield.  **$^1H$  NMR (600 MHz,  $CDCl_3$ )**  $\delta = 7.54$  (d,  $J = 1.9$ , 1H), 7.43 (dd,  $J = 2.0, 8.3$ , 1H),

7.38 (dd,  $J = 1.6, 7.7$ , 1H), 7.15 (ddd,  $J = 1.7, 7.5, 8.4$ , 1H), 6.89 (td,  $J = 1.1, 7.6$ , 1H), 6.58 (dd,  $J = 1.1, 8.3$ , 1H), 6.50 (d,  $J = 8.3$ , 1H), 4.53 (dd,  $J = 8.1, 13.3$ , 1H), 3.99 (dq,  $J = 9.5, 15.4$ , 1H), 3.60 – 3.52 (m, 1H), 3.52 – 3.44 (m, 1H), 3.31 (s, 3H), 2.75 (s, 3H), 2.67 (dd,  $J = 8.1, 16.4$ , 1H).  **$^{13}C$  NMR (151 MHz,  $CDCl_3$ )**  $\delta$  176.1, 173.4, 157.5, 143.2, 132.9, 129.1, 128.6, 128.4, 126.6, 121.1, 120.3, 115.2, 109.8, 109.6, 73.2, 54.1, 42.5, 33.0, 25.8. **HRMS** (ESI) calculated  $[M+Na]^+$  for  $C_{21}H_{18}BrF_3N_2O_3Na$ : 505.0353, found: 505.0381.  $[\alpha]^{20}_D = +57$  ( $c = 0.3$ ,  $CHCl_3$ ). 94% ee as determined

by HPLC (CHIRALPAK IB N-5 Column, hexane/ethanol/diethylamine = 80/20/0.1; 1.0 ml/min, wavelength = 254 nm),  $t_R$  (minor) = 6.838 min,  $t_R$  (major) = 7.855 min.

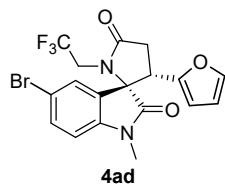

**(3S, 3'S)-5-bromo-3'-(furan-2-yl)-1-methyl-1'-(2,2,2-trifluoroethyl)spiro[indoline-3,2'-pyrrolidine]-2,5'-dione (4ae)** was

synthesized according to general procedure C as a white solid in 71% yield.  $^1\text{H}$  NMR (600 MHz,  $\text{CDCl}_3$ )  $\delta$  = 7.36 (dd,  $J$  = 2.0, 8.3, 1H), 7.15 (dd,  $J$  = 0.8, 1.9, 1H), 6.63 (d,  $J$  = 8.3, 1H), 6.47 (d,  $J$  = 1.9, 1H), 6.17 (dd,  $J$  = 1.9, 3.3, 1H), 5.97 (dt,  $J$  = 0.8, 3.3, 1H), 3.95 (dq,  $J$  = 9.4, 15.5, 1H), 3.85 (dd,  $J$  = 5.3, 8.9, 1H), 3.44 – 3.33 (m, 1H), 3.33 – 3.24 (m, 1H), 3.15 (s, 3H), 2.86 – 2.78 (m, 1H).  $^{13}\text{C}$  NMR (151 MHz,  $\text{CDCl}_3$ )  $\delta$  175.1, 174.2, 151.0, 142.3, 133.4, 128.4, 124.9, 115.5, 110.5, 110.1, 108.5, 70.1, 41.9, 33.2, 29.3, 26.6. HRMS (ESI) calculated  $[\text{M}+\text{Na}]^+$  for  $\text{C}_{18}\text{H}_{14}\text{BrF}_3\text{N}_2\text{O}_3\text{Na}$ : 465.0040, found: 465.0051.  $[\alpha]^{20}_{\text{D}}$  = +69 ( $c$  = 0.3,  $\text{CHCl}_3$ ). 99% ee as determined by HPLC (CHIRALPAK IB N-5 Column, hexane/ethanol/diethylamine = 80/20/0.1; 1.0 ml/min, wavelength = 254 nm),  $t_R$  (minor) = 6.010 min,  $t_R$  (major) = 9.080 min.

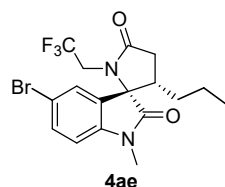

**(3S, 3'S)-5-bromo-1-methyl-3'-propyl-1'-(2,2,2-trifluoroethyl)spiro[indoline-3,2'-pyrrolidine]-2,5'-dione (4af)** was synthesized according to general procedure

C as a white solid in 74% yield.  $^1\text{H}$  NMR (600 MHz,  $\text{CDCl}_3$ )  $\delta$  = 7.56 (dd,  $J$  = 1.9, 8.3, 1H), 7.34 (d,  $J$  = 1.9, 1H), 6.79 (d,  $J$  = 8.3, 1H), 4.01 – 3.79 (m, 1H), 3.42 – 3.31 (m, 1H), 3.19 (s, 3H), 2.75 (dd,  $J$  = 12.3, 16.4, 1H), 2.60 (dd,  $J$  = 8.0, 16.4, 1H), 2.56 – 2.46 (m, 1H), 1.38 – 1.26 (m, 1H), 1.14 – 1.00 (m, 2H), 0.80 (t,  $J$  = 7.2, 3H).  $^{13}\text{C}$  NMR (151 MHz,  $\text{CDCl}_3$ )  $\delta$  176.1, 173.9, 143.7, 133.7, 127.5, 126.9, 116.0, 109.7, 71.6, 46.0, 42.1 (q,  $J$  = 35.97), 34.3, 30.4, 26.3, 21.0, 13.9. HRMS (ESI) calculated  $[\text{M}+\text{Na}]^+$  for  $\text{C}_{17}\text{H}_{18}\text{BrF}_3\text{N}_2\text{O}_2\text{Na}$ : 441.0404, found: 441.0402.  $[\alpha]^{20}_{\text{D}}$  = +48 ( $c$  = 0.2,  $\text{CHCl}_3$ ). 98% ee as determined by HPLC (CHIRALPAK IB N-5 Column, hexane/ethanol/diethylamine = 80/20/0.1; 1.0 ml/min, wavelength = 254 nm),  $t_R$  (minor) = 7.422 min,  $t_R$  (major) = 10.073 min.



## 5. Gram-Scale Experiment.

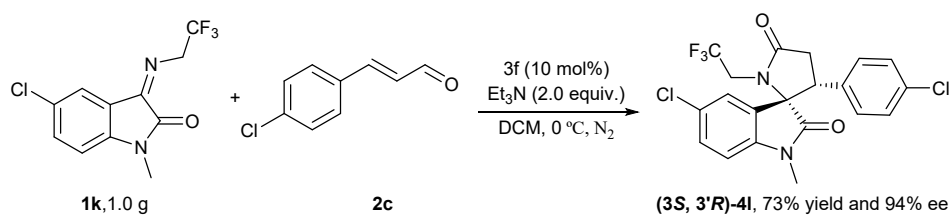

To a flame-dried Schlenk tube was added the co-incubation activation of **3f** (0.2 g, 0.4 mmol) and Et<sub>3</sub>N (2.0 equiv.) in dry DCM (20.0 mL) for 0.5 h, then the vial was sealed under N<sub>2</sub>, followed by the addition of **1k** (1.0 g, 4.00 mmol) and **2c** (0.7 g, 5.00 mmol), the reaction at 0 °C for 48 h. Then the solvent was completely removed, the resulting residue was extracted with ethyl acetate (50.0 mL × 3), and then combined organic layers were dried over Na<sub>2</sub>SO<sub>4</sub>, filtered and concentrated in vacuo. The crude residue was purified via silica gel column chromatography (petroleum ether : ethyl acetate = 4 : 1) to afford the product **(3S, 3'R)-4I** (73% yield, 94% ee) as a white solid.

## 6. Synthetic Transformations of **(3S, 3'R)-4I** into **(3S, 3'R)-6I**.

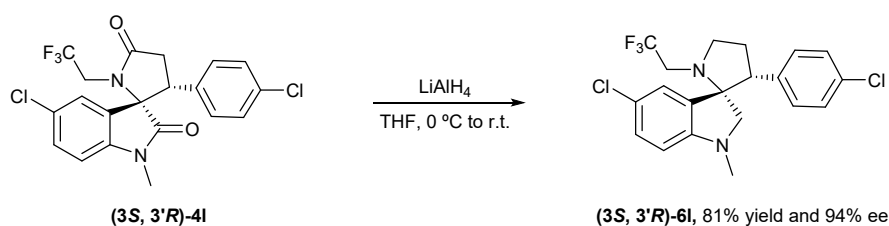

To a solution of **(3S, 3'R)-4I** (50.0 mg, 0.11 mmol) in THF (5.0 mL) was added LiAlH<sub>4</sub> (12.9 mg, 0.34 mmol) at 0 °C. Then the mixture was stirred at room temperature and monitored by TLC until **(3S, 3'R)-4I** was consumed. The filtrate was concentrated under vacuum to give the residue, which was purified via silica gel column chromatography (petroleum ether : ethyl acetate = 3 : 1) to afford **(3S, 3'R)-6I** (85% yield, 94% ee) as a white solid. <sup>1</sup>H NMR (600 MHz, CDCl<sub>3</sub>) δ = 7.46 (d, *J* = 2.1, 1H), 7.35 – 7.27 (m, 2H), 7.16 – 7.00 (m, 2H), 6.82 (d, *J* = 8.5, 2H), 6.55 (d, *J* = 8.3, 1H), 4.72 (d, *J* = 12.6, 1H), 3.86 (dq, *J* = 8.9, 15.1, 1H), 3.64 – 3.47 (m, 1H), 2.93 (ddd, *J* = 6.6, 9.7, 14.6, 1H), 2.78 (s, 3H), 2.55 – 2.47 (m, 1H), 2.42 (dd, *J* = 9.8, 15.0, 1H). <sup>13</sup>C NMR (151 MHz, CDCl<sub>3</sub>) δ 142.3, 133.7, 133.0,

130.0, 129.4, 129.2, 128.8, 128.2, 124.8, 109.5, 85.2, 55.1, 44.1, 43.8 (q,  $J = 33.3$  Hz), 38.7, 29.7, 26.0. 94% ee as determined by HPLC (CHIRALPAK IB N-5 Column, hexane/ethanol/diethylamine = 80/20/0.1; 1.0 ml/min, wavelength = 254 nm),  $t_R$  (minor) = 5.268 min,  $t_R$  (major) = 6.633 min.

## 7. Crystal Data for (3*S*, 3'*R*)-4aa

The absolute configuration of the product (3*S*, 3'*R*)-4aa by X-ray crystallographic analysis of a crystal. The X-ray crystallographic coordinates for the structure of (3*S*, 3'*R*)-4aa are available free of charge from the Cambridge Crystallographic Data Centre under deposition number CCDC 2106628.

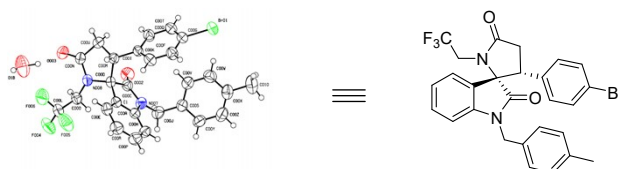

Figure. S1. X-ray structure of (3*S*, 3'*R*)-4aa.

**Table S2. Sample and crystal data for 4aa.**

|                        |                                                                                                    |
|------------------------|----------------------------------------------------------------------------------------------------|
| Identification code    | 4aa                                                                                                |
| Empirical formula      | C <sub>27</sub> H <sub>22</sub> BrF <sub>3</sub> N <sub>2</sub> O <sub>2</sub>                     |
| Formula weight         | 542.08                                                                                             |
| Temperature            | 293(2) K                                                                                           |
| Wavelength             | 1.54178 Å                                                                                          |
| Crystal system         | monoclinic                                                                                         |
| Space group            | P21                                                                                                |
| Unit cell dimensions   | a = 11.3667(3) Å    α = 90°<br>b = 7.8133(2) Å    β = 105.3130(10)°<br>c = 14.3984(4) Å    γ = 90° |
| Volume                 | 1233.34(6) Å <sup>3</sup>                                                                          |
| Z                      | 2                                                                                                  |
| Density (calculated)   | 1.512 g/cm <sup>3</sup>                                                                            |
| Absorption coefficient | 2.756 mm <sup>-1</sup>                                                                             |
| F (000)                | 572                                                                                                |

|                                     |                                   |
|-------------------------------------|-----------------------------------|
| Crystal size                        | ?×?×?                             |
| Theta range for data collection     | 3.18 to 68.26°                    |
| Index ranges                        | -13<=h<=13, -9<=k<=9, -17<=l<=17  |
| Reflections collected               | 21753                             |
| Independent reflections             | 4471 [R(int) = 0.0373]            |
| Coverage of independent reflections | 99.8 %                            |
| Absorption correction               | Multi-Scan                        |
| Refinement method                   | Full-matrix least-squares on F2   |
| Data/restraints/parameters          | 4471 / 1 / 334                    |
| Goodness-of-fit on F2               | 1.050                             |
| Final R indices [I>2sigma(I)]       | R1=0.0320, wR2=0.0891             |
| Final R indices [all data]          | R1=0.0342, wR2=0.0915             |
| Largest diff. peak and hole         | 0.251 and -0.415 eÅ <sup>-3</sup> |
| Absolute structure parameter        | 0.020 (7)                         |

## 8. Computational Details

All the density function theory (DFT) calculations were performed at B3LYP/6-31g\* level [1-2] as implemented in Gaussian 16 software packages [3]. For each step, geometry optimization and transition state optimization were employed. Frequency analysis was also conducted at the same level of theory to verify the nature of stationary points and the imaginary frequency of transition state. For more accurate energies, the Gibbs free energy was obtained by Shermo program [4] with thermal correction under 298.15 K and 1 atm. All the steps above were calculated in chloroform solvent environment based on IEFPCM model [5]

## 9. References

- [1] Stephens, P.J.; Devlin, F.J.; Chabalowski, C.F.; Frisch, M.J. Ab initio calculation of vibrational absorption and circular dichroism spectra using density functional force fields. *J. Phys. Chem.* 1994, 98, 11623–11627
- [2] Petersson, A.; Bennett, A.; Tensfeldt, T.G.; Al-Laham, M.A.; Shirley, W.A.; Mantzaris, J. A complete basis set model chemistry. I. The total energies of closed-shell atoms and hydrides of the first-row elements. *J. Chem. Phys.* 1988, 89, 2193–2218.

[3] Gaussian 16, Revision A.03, M. J. Frisch, G. W. Trucks, H. B. Schlegel, G. E. Scuseria, M. A. Robb, J. R. Cheeseman, G. Scalmani, V. Barone, G. A. Petersson, H. Nakatsuji, X. Li, M. Caricato, A. V. Marenich, J. Bloino, B. G. Janesko, R. Gomperts, B. Mennucci, H. P. Hratchian, J. V. Ortiz, A. F. Izmaylov, J. L. Sonnenberg, D. Williams-Young, F. Ding, F. Lipparini, F. Egidi, J. Goings, B. Peng, A. Petrone, T. Henderson, D. Ranasinghe, V. G. Zakrzewski, J. Gao, N. Rega, G. Zheng, W. Liang, M. Hada, M. Ehara, K. Toyota, R. Fukuda, J. Hasegawa, M. Ishida, T. Nakajima, Y. Honda, O. Kitao, H. Nakai, T. Vreven, K. Throssell, J. A. Montgomery, Jr., J. E. Peralta, F. Ogliaro, M. J. Bearpark, J. J. Heyd, E. N. Brothers, K. N. Kudin, V. N. Staroverov, T. A. Keith, R. Kobayashi, J. Normand, K. Raghavachari, A. P. Rendell, J. C. Burant, S. S. Iyengar, J. Tomasi, M. Cossi, J. M. Millam, M. Klene, C. Adamo, R. Cammi, J. W. Ochterski, R. L. Martin, K. Morokuma, O. Farkas, J. B. Foresman, and D. J. Fox, Gaussian, Inc., Wallingford CT, 2016..

[4] Lu T, Chen Q. Shermo: A general code for calculating molecular thermochemistry properties[J]. Computational and Theoretical Chemistry, 2021, 1200: 113249.

[5] E. Cancès, B. Mennucci, and J. Tomasi. “A new integral equation formalism for the polarizable continuum model: Theoretical background and applications to isotropic and anisotropic dielectrics”. In: J. Chem. Phys. 107 (1997), pages 3032–41.

Cartesian coordinates of the structures

R1

%chk=R1.chk

%nprocshared=32

# opt=(maxstep=5,notrust,gdiis,cartesian) freq b3lyp/6-31g(d)

scrf=(solvent=dichloromethane) nosymm

Title Card Required

0 1

|   |             |             |             |
|---|-------------|-------------|-------------|
| C | -1.61207400 | -0.42713900 | -0.38749900 |
| C | -0.23848200 | -0.31762900 | -0.57627400 |
| C | 0.44068900  | 0.86848700  | -0.23049400 |
| C | -0.30465100 | 1.93459100  | 0.30881700  |
| C | -1.68087300 | 1.82389000  | 0.49742200  |
| C | -2.33858600 | 0.64221100  | 0.14959500  |
| H | -2.12094000 | -1.34766800 | -0.65892300 |
| H | 0.31096600  | -1.15576100 | -0.99378200 |
| H | 0.20639200  | 2.85509500  | 0.57988400  |
| H | -2.23854600 | 2.65740800  | 0.91461400  |
| H | -3.41133500 | 0.55195000  | 0.29506900  |
| C | 1.88018200  | 1.04003100  | -0.40721300 |
| H | 2.26780700  | 2.01043700  | -0.09301600 |
| C | 2.77236400  | 0.15454800  | -0.90566600 |
| H | 2.49389300  | -0.83897400 | -1.24757900 |
| C | 4.18359100  | 0.51094500  | -1.00667300 |
| O | 5.05837400  | -0.22580000 | -1.44412900 |
| H | 4.43360400  | 1.53364800  | -0.64927500 |

R2

%chk=R2.chk

# opt=(maxstep=5,notrust,gdiis,cartesian) freq b3lyp/6-31g(d)

scrf=(solvent=dichloromethane) nosymm

Title Card Required

0 1

|   |             |            |            |
|---|-------------|------------|------------|
| C | -0.06761000 | 1.45665200 | 0.52832200 |
| C | -0.98124100 | 2.49051300 | 1.12466400 |

|   |             |             |             |
|---|-------------|-------------|-------------|
| C | -2.75024100 | 1.14828600  | 0.33502400  |
| H | -1.08919100 | 2.29594300  | 2.20386400  |
| H | -0.56772000 | 3.49467600  | 1.00176000  |
| H | -2.71143400 | 0.61819100  | 1.29924600  |
| H | -3.79551000 | 1.24067200  | 0.04285900  |
| O | -2.25279000 | 2.47720800  | 0.49253400  |
| N | -0.53752500 | 0.44245000  | -0.28236700 |
| C | 0.48438500  | -0.42671200 | -0.60323600 |
| N | 1.20686900  | 1.31978200  | 0.75922000  |
| N | 1.51541300  | 0.15605600  | 0.04617400  |
| C | 2.86791600  | -0.32635400 | 0.07069400  |
| C | 3.80773300  | 0.24157400  | -0.80346300 |
| C | 3.21073700  | -1.34669500 | 0.97103800  |
| C | 5.11955500  | -0.24093300 | -0.75905800 |
| C | 4.53458700  | -1.79877300 | 0.97513300  |
| C | 5.50360500  | -1.25676300 | 0.12366100  |
| H | 5.85783800  | 0.18578000  | -1.43465300 |
| H | 4.81425700  | -2.59365400 | 1.66321400  |
| C | 3.41214600  | 1.33010500  | -1.77157900 |
| H | 2.59810800  | 0.99906900  | -2.42740000 |
| H | 3.05345700  | 2.22168900  | -1.24466600 |
| H | 4.26000300  | 1.62067300  | -2.39823900 |
| C | 2.18353800  | -1.94409200 | 1.90220600  |
| H | 1.75648700  | -1.18186200 | 2.56494000  |
| H | 1.34946700  | -2.38235000 | 1.34279400  |
| H | 2.63046000  | -2.72431800 | 2.52472000  |
| C | 6.93481000  | -1.73959000 | 0.17190100  |
| H | 7.53032200  | -1.14073700 | 0.87385000  |
| H | 6.99489300  | -2.78173700 | 0.50217500  |
| H | 7.41642400  | -1.66270400 | -0.80853200 |

|   |             |             |             |
|---|-------------|-------------|-------------|
| C | -1.94763100 | 0.35338700  | -0.71033100 |
| H | -2.23915300 | -0.69829200 | -0.61108600 |
| C | -2.16467900 | 0.75602400  | -2.21299700 |
| C | -1.56638500 | -0.34447300 | -3.11474700 |
| H | -0.50665900 | -0.50740600 | -2.90103000 |
| H | -2.08530800 | -1.30009000 | -2.96606400 |
| H | -1.67489700 | -0.06388600 | -4.16910100 |
| C | -3.67899200 | 0.83594200  | -2.50203000 |
| H | -4.20569500 | -0.06150800 | -2.15317100 |
| H | -4.14704100 | 1.71068400  | -2.03819900 |
| H | -3.84260600 | 0.91396000  | -3.58262500 |
| C | -1.50878300 | 2.10697600  | -2.55834400 |
| H | -1.89670100 | 2.91511900  | -1.93231600 |
| H | -0.42089900 | 2.06825100  | -2.43302300 |
| H | -1.71000200 | 2.35660600  | -3.60683200 |

TS1

%chk=TS1.chk

# opt=(calcfc,ts,noeigen,maxstep=5,notrust,gdiis,cartesian) freq

b3lyp/6-31g(d) scrf=(solvent=dichloromethane) nosymm

Title Card Required

0 1

|   |             |            |            |
|---|-------------|------------|------------|
| C | 0.02439500  | 1.83593700 | 0.58707700 |
| C | -0.88920700 | 2.89962500 | 1.13124300 |
| C | -2.65154200 | 1.46865400 | 0.46910500 |
| H | -0.93783500 | 2.78836800 | 2.22567000 |
| H | -0.50144700 | 3.89691800 | 0.90870100 |
| H | -2.56862700 | 0.96824800 | 1.44546200 |

|   |             |             |             |
|---|-------------|-------------|-------------|
| H | -3.70645100 | 1.52451500  | 0.20412100  |
| O | -2.18597400 | 2.81426700  | 0.56395500  |
| N | -0.44531400 | 0.78161600  | -0.16596000 |
| C | 0.57948200  | -0.09913800 | -0.37849500 |
| N | 1.29541600  | 1.70487000  | 0.84193900  |
| N | 1.62017500  | 0.49935800  | 0.22519800  |
| C | 2.98210000  | 0.04042400  | 0.31134100  |
| C | 3.84619700  | 0.27680900  | -0.76779300 |
| C | 3.40005800  | -0.60389600 | 1.48753200  |
| C | 5.16867900  | -0.16361400 | -0.64805200 |
| C | 4.73188200  | -1.02354100 | 1.55505800  |
| C | 5.63074700  | -0.81108800 | 0.50261700  |
| H | 5.85318600  | 0.00624400  | -1.47593500 |
| H | 5.07360700  | -1.53282900 | 2.45329800  |
| C | 3.37204100  | 0.96826400  | -2.02341800 |
| H | 2.65202300  | 0.34898100  | -2.57174000 |
| H | 2.87470300  | 1.91800900  | -1.79650600 |
| H | 4.21337000  | 1.17530500  | -2.69046200 |
| C | 2.43989500  | -0.85939900 | 2.62430700  |
| H | 2.07113800  | 0.08133300  | 3.05011700  |
| H | 1.56674800  | -1.42580800 | 2.27639100  |
| H | 2.93134100  | -1.42336100 | 3.42232700  |
| C | 7.07174600  | -1.24967500 | 0.61951100  |
| H | 7.67332300  | -0.48964600 | 1.13536000  |
| H | 7.16164400  | -2.17755500 | 1.19407500  |
| H | 7.52270900  | -1.41024500 | -0.36482500 |
| C | -1.86170900 | 0.66263000  | -0.57799500 |
| H | -2.13418200 | -0.38932400 | -0.44702400 |
| C | -2.10149500 | 1.05094700  | -2.08113300 |
| C | -1.42474900 | 0.01105800  | -2.99752000 |



|   |             |             |             |
|---|-------------|-------------|-------------|
| H | -0.34565700 | -0.05189400 | -2.82305200 |
| H | -1.85062200 | -0.98901200 | -2.85715800 |
| H | -1.57546400 | 0.29190100  | -4.04607800 |
| C | -3.61948300 | 1.01378600  | -2.36227500 |
| H | -4.07119300 | 0.07322300  | -2.02305900 |
| H | -4.15186900 | 1.84280400  | -1.88486200 |
| H | -3.79419100 | 1.09351700  | -3.44073000 |
| C | -1.55178700 | 2.44876900  | -2.42893100 |
| H | -2.01516800 | 3.23078300  | -1.82310600 |
| H | -0.46619900 | 2.50225800  | -2.28597600 |
| H | -1.75193500 | 2.66594300  | -3.48450300 |
| C | 0.14609900  | -1.99099200 | -0.37431500 |
| H | -0.62574900 | -1.91203600 | -1.15850100 |
| C | 1.39188400  | -2.66062700 | -0.89385900 |
| H | 2.29758600  | -2.48825500 | -0.31860900 |
| C | 1.46444000  | -3.48317500 | -1.95570600 |
| H | 2.45070100  | -3.86768000 | -2.21928400 |
| C | 0.37378700  | -3.95271800 | -2.83587700 |
| C | -0.91149600 | -4.26441600 | -2.35232600 |
| C | 0.63403900  | -4.15968100 | -4.20310000 |
| C | -1.90643600 | -4.72756200 | -3.21365700 |
| H | -1.11875100 | -4.16998500 | -1.29067200 |
| C | -0.36111200 | -4.61948400 | -5.06492700 |
| H | 1.62768600  | -3.94742700 | -4.59110200 |
| C | -1.63872900 | -4.90102400 | -4.57423700 |
| H | -2.89007800 | -4.96635900 | -2.81763500 |
| H | -0.13777100 | -4.76308700 | -6.11889500 |
| H | -2.41401900 | -5.26566700 | -5.24258100 |
| O | -0.21975300 | -2.18798100 | 0.82762300  |

M1

%chk=M1.chk

# opt=(maxstep=5,notrust,gdiis,cartesian) freq b3lyp/6-31g(d)

scrf=(solvent=dichloromethane) nosymm

Title Card Required

0 1

|   |             |             |             |
|---|-------------|-------------|-------------|
| C | -0.01129800 | 1.42961600  | 0.41756000  |
| C | -0.94411800 | 2.44768600  | 1.01673800  |
| C | -2.65028300 | 0.91499400  | 0.37197700  |
| H | -0.88135700 | 2.35471500  | 2.11101200  |
| H | -0.64076700 | 3.46282200  | 0.74556000  |
| H | -2.46090900 | 0.32382400  | 1.27968900  |
| H | -3.72258300 | 0.91557800  | 0.18172900  |
| O | -2.28036000 | 2.27811000  | 0.57374700  |
| N | -0.45442300 | 0.43543600  | -0.42165100 |
| C | 0.57391600  | -0.44731800 | -0.59238300 |
| N | 1.24503900  | 1.27223600  | 0.72582800  |
| N | 1.60673600  | 0.10478700  | 0.06801000  |
| C | 2.96546600  | -0.35414800 | 0.21928900  |
| C | 3.93385100  | 0.11819400  | -0.67994300 |
| C | 3.27025400  | -1.21255000 | 1.28733900  |
| C | 5.25011800  | -0.31462200 | -0.49556900 |
| C | 4.60258800  | -1.61603800 | 1.42253600  |
| C | 5.60367100  | -1.17889500 | 0.54752600  |
| H | 6.01639800  | 0.03183900  | -1.18497500 |
| H | 4.86200200  | -2.29095400 | 2.23485100  |
| C | 3.57071700  | 1.04541500  | -1.81472300 |
| H | 2.88907300  | 0.56231300  | -2.52571600 |

|   |             |             |             |
|---|-------------|-------------|-------------|
| H | 3.06973200  | 1.94898900  | -1.44945400 |
| H | 4.46509300  | 1.35080100  | -2.36420900 |
| C | 2.20076200  | -1.69174900 | 2.23719600  |
| H | 1.80443100  | -0.85826600 | 2.83151300  |
| H | 1.35769100  | -2.13127000 | 1.68488000  |
| H | 2.60792100  | -2.43410500 | 2.92974800  |
| C | 7.03903500  | -1.60844600 | 0.74027300  |
| H | 7.56825500  | -0.91766400 | 1.40987700  |
| H | 7.10129000  | -2.60574900 | 1.18739200  |
| H | 7.58356900  | -1.62234900 | -0.20926000 |
| C | -1.88003900 | 0.28653900  | -0.80378200 |
| H | -2.07384100 | -0.79045800 | -0.78516600 |
| C | -2.21647700 | 0.85638800  | -2.22901400 |
| C | -1.50141600 | 0.03132900  | -3.31838400 |
| H | -0.41119600 | 0.07277900  | -3.22022700 |
| H | -1.80954100 | -1.01973100 | -3.30298200 |
| H | -1.75383300 | 0.43713200  | -4.30454100 |
| C | -3.73825000 | 0.71647400  | -2.45386000 |
| H | -4.08487000 | -0.30374800 | -2.24808400 |
| H | -4.31635000 | 1.40820200  | -1.83295400 |
| H | -3.97616200 | 0.94209700  | -3.49892400 |
| C | -1.80711300 | 2.33375700  | -2.40072900 |
| H | -2.32783200 | 2.98828900  | -1.69929200 |
| H | -0.72774400 | 2.47114400  | -2.26392500 |
| H | -2.04774800 | 2.65883600  | -3.41937100 |
| C | 0.32421500  | -1.90504400 | -1.03463400 |
| H | -0.38493600 | -1.82826600 | -1.88245200 |
| C | 1.54503200  | -2.62398300 | -1.59451300 |
| H | 2.53060500  | -2.30379200 | -1.27077200 |
| C | 1.48961600  | -3.67589500 | -2.43318800 |

|   |             |             |             |
|---|-------------|-------------|-------------|
| H | 2.44047400  | -4.09295900 | -2.76777400 |
| C | 0.30414000  | -4.35075400 | -2.99236200 |
| C | -0.94291100 | -4.38686200 | -2.33397700 |
| C | 0.42591800  | -5.02322700 | -4.22410400 |
| C | -2.02887900 | -5.04383500 | -2.91448600 |
| H | -1.03470200 | -3.92574200 | -1.35177800 |
| C | -0.66183600 | -5.67647400 | -4.80088700 |
| H | 1.38641300  | -5.02233600 | -4.73518400 |
| C | -1.89827100 | -5.68534800 | -4.14919200 |
| H | -2.98189300 | -5.06601800 | -2.39121000 |
| H | -0.54421900 | -6.18211100 | -5.75599500 |
| H | -2.74713600 | -6.19893100 | -4.59301600 |
| O | -0.22338300 | -2.42637500 | 0.09261800  |

TS2

%chk=TS2Et3.chk

# opt=(maxstep=5,notrust,gdiis,cartesian) freq b3lyp/6-31g(d)

scrf=(solvent=dichloromethane) nosymm

Title Card Required

0 1

|   |             |            |            |
|---|-------------|------------|------------|
| C | 0.15177100  | 1.63577600 | 0.73327400 |
| C | -0.66897900 | 2.70313600 | 1.40748500 |
| C | -2.57000900 | 1.47188300 | 0.74536100 |
| H | -0.68715700 | 2.48625600 | 2.48843900 |
| H | -0.21267800 | 3.68560400 | 1.26689600 |
| H | -2.53217600 | 0.92300700 | 1.69945200 |
| H | -3.61616600 | 1.63470500 | 0.48809100 |
| O | -1.99332100 | 2.76771300 | 0.90631100 |

|   |             |             |             |
|---|-------------|-------------|-------------|
| N | -0.44734100 | 0.55715100  | 0.11583200  |
| C | 0.56563200  | -0.38563400 | -0.14287800 |
| N | 1.43852200  | 1.53321400  | 0.80835400  |
| N | 1.73007300  | 0.30203400  | 0.21022900  |
| C | 3.10978600  | -0.02610900 | 0.03528400  |
| C | 3.67934600  | 0.01975700  | -1.25091600 |
| C | 3.88380000  | -0.33203600 | 1.17118400  |
| C | 5.04043500  | -0.27448000 | -1.37994500 |
| C | 5.24295500  | -0.60375000 | 0.99021500  |
| C | 5.84111800  | -0.58216300 | -0.27501700 |
| H | 5.48760100  | -0.25039400 | -2.37143500 |
| H | 5.84793900  | -0.84789100 | 1.86092700  |
| C | 2.85077600  | 0.36101800  | -2.46379400 |
| H | 2.13345800  | -0.43702900 | -2.69246900 |
| H | 2.27196600  | 1.27827400  | -2.30714600 |
| H | 3.48799300  | 0.50329700  | -3.34124900 |
| C | 3.26468100  | -0.38347900 | 2.54681300  |
| H | 2.91109900  | 0.60451200  | 2.86155100  |
| H | 2.39530100  | -1.05155400 | 2.56690500  |
| H | 3.98837300  | -0.74220800 | 3.28435700  |
| C | 7.31788000  | -0.85678400 | -0.43867100 |
| H | 7.90502700  | 0.06597300  | -0.33905900 |
| H | 7.68159500  | -1.55529000 | 0.32225800  |
| H | 7.54016100  | -1.27806700 | -1.42449400 |
| C | -1.85743700 | 0.64505900  | -0.33757800 |
| H | -2.25950800 | -0.36725500 | -0.30783700 |
| C | -2.02964200 | 1.17532200  | -1.81190000 |
| C | -1.43832500 | 0.15850800  | -2.80998300 |
| H | -0.36076800 | 0.03116000  | -2.67210900 |
| H | -1.90438100 | -0.82508700 | -2.70580900 |

|   |             |             |             |
|---|-------------|-------------|-------------|
| H | -1.60319800 | 0.51495300  | -3.83381100 |
| C | -3.54165500 | 1.29688700  | -2.10763900 |
| H | -4.07850900 | 0.37448600  | -1.85200700 |
| H | -4.00865100 | 2.12672400  | -1.56694900 |
| H | -3.69360400 | 1.48053600  | -3.17718100 |
| C | -1.35749000 | 2.54151500  | -2.05572700 |
| H | -1.77407300 | 3.32386800  | -1.41768900 |
| H | -0.27624300 | 2.49654000  | -1.88044500 |
| H | -1.50341200 | 2.83586000  | -3.10202400 |
| C | 0.38647600  | -1.70929100 | -0.52714300 |
| C | 1.46751800  | -2.63911600 | -0.66068900 |
| H | 2.39489700  | -2.28522200 | -0.21927100 |
| C | 1.55889700  | -3.91361200 | -1.16071300 |
| H | 2.51511900  | -4.39563400 | -0.95635600 |
| C | 0.66743100  | -4.76149300 | -1.95081100 |
| C | -0.44349100 | -4.30632600 | -2.69823300 |
| C | 0.98171200  | -6.13868800 | -2.04702000 |
| C | -1.20206900 | -5.18674000 | -3.46926200 |
| H | -0.70964800 | -3.25834900 | -2.66056900 |
| C | 0.22279000  | -7.01533100 | -2.81771900 |
| H | 1.84154700  | -6.51816700 | -1.49814000 |
| C | -0.88175000 | -6.54602900 | -3.53573000 |
| H | -2.04904500 | -4.80278800 | -4.03399600 |
| H | 0.49529000  | -8.06741100 | -2.86070200 |
| H | -1.47512600 | -7.22485600 | -4.14263200 |
| O | -0.93009300 | -2.11411400 | -0.73426200 |
| H | -1.18772300 | -2.75209400 | -0.00343600 |
| N | -1.86629100 | -3.68023900 | 1.40003000  |
| C | -1.34770300 | -2.87559800 | 2.52426900  |
| H | -0.25731200 | -2.98703100 | 2.51941700  |

|   |             |             |             |
|---|-------------|-------------|-------------|
| H | -1.55325500 | -1.82639400 | 2.27273000  |
| C | -3.32352400 | -3.55126800 | 1.22284900  |
| H | -3.88304000 | -4.05724800 | 2.02551300  |
| H | -3.55537700 | -2.48253700 | 1.31257200  |
| C | -1.33941200 | -5.05729000 | 1.29695300  |
| H | -1.44392300 | -5.36600800 | 0.25161700  |
| H | -0.26199700 | -4.99372500 | 1.48304000  |
| C | -1.95633500 | -6.14514000 | 2.19029000  |
| H | -1.49361300 | -7.10892500 | 1.94721600  |
| H | -1.79575500 | -5.95895500 | 3.25572000  |
| H | -3.03405700 | -6.24980700 | 2.02358600  |
| C | -1.88256500 | -3.14609500 | 3.93981000  |
| H | -1.59235200 | -4.13176400 | 4.31406900  |
| H | -1.47095400 | -2.39717600 | 4.62690400  |
| H | -2.97413200 | -3.07016900 | 3.98619700  |
| C | -3.81773800 | -4.05635900 | -0.13405500 |
| H | -3.70832000 | -5.14089300 | -0.23637800 |
| H | -4.88191900 | -3.82133700 | -0.24617400 |
| H | -3.27055000 | -3.58093300 | -0.95458700 |

TS2-direct

%mem=128GB

%nprocshared=32

%chk=TS2.chk

# opt=(calcfc,ts,noeigen,maxstep=5,notrust,gdiis,cartesian) freq

b3lyp/6-31g(d) scrf=(solvent=dichloromethane) nosymm

Title Card Required

0 1

|   |             |             |             |
|---|-------------|-------------|-------------|
| C | -0.27101500 | 1.03637100  | 0.62018600  |
| C | -1.22000000 | 1.76440100  | 1.53882800  |
| C | -2.94231400 | 0.74254700  | 0.26434800  |
| H | -1.25395600 | 1.20600100  | 2.48735000  |
| H | -0.85174300 | 2.77086900  | 1.75364500  |
| H | -2.88010200 | -0.15670200 | 0.89546100  |
| H | -3.98885900 | 0.90892200  | 0.01248800  |
| O | -2.52198600 | 1.89435500  | 0.99728000  |
| N | -0.70856600 | 0.35008000  | -0.48937500 |
| C | 0.35038600  | -0.41932500 | -0.94179100 |
| N | 0.98619300  | 0.82336800  | 0.86936300  |
| N | 1.38113500  | -0.07974400 | -0.10763500 |
| C | 2.73980200  | -0.54797000 | -0.06273100 |
| C | 3.72768900  | 0.19978400  | -0.72353700 |
| C | 3.04186000  | -1.68866300 | 0.69697600  |
| C | 5.04995800  | -0.24332900 | -0.62975200 |
| C | 4.38000200  | -2.08956200 | 0.75884200  |
| C | 5.39518500  | -1.38742000 | 0.09964200  |
| H | 5.82893900  | 0.32278300  | -1.13520600 |
| H | 4.63427100  | -2.97211700 | 1.34122100  |
| C | 3.37705000  | 1.44298000  | -1.50572500 |
| H | 2.67908200  | 1.22266800  | -2.32273900 |
| H | 2.89717900  | 2.19359900  | -0.86716900 |
| H | 4.27399500  | 1.89048700  | -1.94223500 |
| C | 1.96478200  | -2.46644300 | 1.41199200  |
| H | 1.33853600  | -1.81237700 | 2.02838600  |
| H | 1.30541000  | -2.97393700 | 0.69735100  |
| H | 2.40525100  | -3.22863000 | 2.06052800  |
| C | 6.82792700  | -1.86225000 | 0.15878800  |
| H | 7.02853100  | -2.41450600 | 1.08239300  |



|   |             |             |             |
|---|-------------|-------------|-------------|
| H | 7.05275800  | -2.53532900 | -0.67906700 |
| H | 7.53012100  | -1.02436200 | 0.09929400  |
| C | -2.09667200 | 0.53413200  | -1.00049300 |
| H | -2.36237600 | -0.41781500 | -1.46129600 |
| C | -2.22420500 | 1.66206000  | -2.09314500 |
| C | -1.50967300 | 1.22651600  | -3.38991300 |
| H | -0.42722800 | 1.13276600  | -3.24646400 |
| H | -1.89612000 | 0.27183800  | -3.75984900 |
| H | -1.66640100 | 1.98304400  | -4.16710700 |
| C | -3.72391800 | 1.83756600  | -2.42123200 |
| H | -4.20318000 | 0.87708100  | -2.64756200 |
| H | -4.27519200 | 2.31359700  | -1.60399900 |
| H | -3.83343600 | 2.47783200  | -3.30337400 |
| C | -1.63916400 | 3.02139500  | -1.65924500 |
| H | -2.14937700 | 3.42712000  | -0.78356700 |
| H | -0.56847100 | 2.94854200  | -1.43379500 |
| H | -1.74556800 | 3.73846800  | -2.48179200 |
| C | 0.30867400  | -1.37128000 | -2.01649500 |
| H | -0.25789800 | -0.94823700 | -2.97638500 |
| C | 1.48886000  | -2.18597500 | -2.33327200 |
| H | 2.41323100  | -1.61621900 | -2.39823500 |
| C | 1.60002900  | -3.49542800 | -2.67582700 |
| H | 2.59074400  | -3.78761400 | -3.02551400 |
| C | 0.65947400  | -4.61920700 | -2.63283800 |
| C | -0.54953700 | -4.62766100 | -1.90398800 |
| C | 1.01968300  | -5.80536500 | -3.30963600 |
| C | -1.36080100 | -5.76215600 | -1.88142500 |
| H | -0.86119200 | -3.72761600 | -1.38841700 |
| C | 0.20932700  | -6.93796500 | -3.28292000 |
| H | 1.95361700  | -5.82909200 | -3.86775500 |

|   |             |             |             |
|---|-------------|-------------|-------------|
| C | -0.99118600 | -6.92278500 | -2.56683700 |
| H | -2.28918100 | -5.74160700 | -1.31497200 |
| H | 0.51522300  | -7.83312800 | -3.81904100 |
| H | -1.62485700 | -7.80541600 | -2.53676100 |
| O | -1.02206400 | -1.84658600 | -2.39314400 |

M2

%chk=M2.chk

# opt=(maxstep=5,notrust,gdiis,cartesian) freq b3lyp/6-31g(d)

scrf=(solvent=dichloromethane) nosymm

Title Card Required

0 1

|   |             |             |             |
|---|-------------|-------------|-------------|
| C | -0.14987900 | 1.35060600  | 0.56134400  |
| C | -1.01935200 | 2.29387700  | 1.34933700  |
| C | -2.86044000 | 1.22308700  | 0.34124800  |
| H | -1.12656900 | 1.89004600  | 2.36934900  |
| H | -0.55058800 | 3.27778100  | 1.42120200  |
| H | -2.87950600 | 0.51461900  | 1.18353400  |
| H | -3.88882100 | 1.43392700  | 0.05088600  |
| O | -2.29793700 | 2.46621800  | 0.76116700  |
| N | -0.69826200 | 0.42131900  | -0.29980700 |
| C | 0.33551600  | -0.44208500 | -0.68693900 |
| N | 1.12679400  | 1.20774100  | 0.71781300  |
| N | 1.45704300  | 0.10488800  | -0.07570100 |
| C | 2.77881000  | -0.43042500 | 0.05196200  |
| C | 3.81497200  | 0.14866700  | -0.70088000 |

|   |             |             |             |
|---|-------------|-------------|-------------|
| C | 3.01869700  | -1.47608100 | 0.96050000  |
| C | 5.10669900  | -0.36384100 | -0.54649700 |
| C | 4.32589200  | -1.96023400 | 1.07189400  |
| C | 5.38212700  | -1.41914700 | 0.33061400  |
| H | 5.91646000  | 0.07070000  | -1.12859800 |
| H | 4.52382400  | -2.77614900 | 1.76366500  |
| C | 3.54234100  | 1.29122100  | -1.64971300 |
| H | 2.79018900  | 1.02031500  | -2.40028300 |
| H | 3.15673900  | 2.16737700  | -1.11591200 |
| H | 4.45540800  | 1.58556300  | -2.17487000 |
| C | 1.90446100  | -2.06081000 | 1.79298400  |
| H | 1.37654300  | -1.28030800 | 2.35298400  |
| H | 1.16137200  | -2.56584800 | 1.16447000  |
| H | 2.29651500  | -2.78858300 | 2.50898600  |
| C | 6.79090800  | -1.93937900 | 0.49719700  |
| H | 7.32141200  | -1.39410400 | 1.28913800  |
| H | 6.79634500  | -2.99887900 | 0.77300100  |
| H | 7.37232800  | -1.82150900 | -0.42306100 |
| C | -2.07546700 | 0.59618200  | -0.82349500 |
| H | -2.47850200 | -0.40275200 | -0.99436700 |
| C | -2.14763100 | 1.38335400  | -2.18810700 |
| C | -1.58695100 | 0.51304100  | -3.33274700 |
| H | -0.53267100 | 0.26421900  | -3.18141700 |
| H | -2.14857400 | -0.42131400 | -3.43695800 |
| H | -1.66810700 | 1.05931800  | -4.27970600 |
| C | -3.63099100 | 1.67454200  | -2.50812700 |
| H | -4.24770800 | 0.77040300  | -2.42737800 |
| H | -4.05617600 | 2.44032800  | -1.85132000 |
| H | -3.71917300 | 2.04231200  | -3.53649000 |
| C | -1.36687600 | 2.71265400  | -2.16278800 |

|   |             |             |             |
|---|-------------|-------------|-------------|
| H | -1.74226700 | 3.39076200  | -1.39312800 |
| H | -0.29717900 | 2.54995700  | -1.98768000 |
| H | -1.46377000 | 3.20983600  | -3.13528300 |
| C | 0.22360600  | -1.61957900 | -1.41513600 |
| C | 1.31409000  | -2.28673600 | -2.04877100 |
| H | 2.22662100  | -1.69810800 | -2.08689900 |
| C | 1.37927700  | -3.48065800 | -2.72232200 |
| H | 2.29882300  | -3.62782600 | -3.28771000 |
| C | 0.45734700  | -4.61489700 | -2.81915000 |
| C | -0.49893100 | -4.95955800 | -1.83544100 |
| C | 0.57849800  | -5.48596100 | -3.92765700 |
| C | -1.30863500 | -6.08570000 | -1.98011300 |
| H | -0.59944600 | -4.34222100 | -0.95100900 |
| C | -0.22890700 | -6.61131100 | -4.06813900 |
| H | 1.32089900  | -5.26076800 | -4.69068000 |
| C | -1.18692100 | -6.91802300 | -3.09627100 |
| H | -2.03301000 | -6.32255500 | -1.20404000 |
| H | -0.11053400 | -7.25227300 | -4.93866600 |
| H | -1.81821100 | -7.79625100 | -3.20142200 |
| O | -1.08434400 | -2.09072300 | -1.57721500 |
| H | -1.16136000 | -2.42799300 | -2.48587800 |

R3

%mem=128GB

%nprocshared=32

%chk=R3.chk

# opt=(maxstep=5,notrust,gdiis,cartesian) freq b3lyp/6-31g(d)

scrf=(solvent=dichloromethane) nosymm

Title Card Required

0 1

|   |            |             |              |
|---|------------|-------------|--------------|
| C | 3.28923200 | -4.54020800 | -7.55000200  |
| C | 2.22108700 | -4.55804900 | -8.46810900  |
| C | 2.99057200 | -2.39722400 | -8.55764200  |
| C | 3.83873000 | -3.18261800 | -7.54721000  |
| N | 2.06107100 | -3.28491300 | -9.05062500  |
| O | 3.10966200 | -1.21909400 | -8.86835400  |
| N | 4.81630500 | -2.76609300 | -6.84176300  |
| C | 5.25511800 | -1.38548000 | -6.94030000  |
| C | 6.39690700 | -1.15747500 | -5.96901300  |
| F | 6.82531400 | 0.12396800  | -6.04482900  |
| F | 6.02936600 | -1.38629200 | -4.69017300  |
| F | 7.45487500 | -1.95419100 | -6.23053200  |
| C | 1.05740300 | -2.93930600 | -10.04079600 |
| C | 1.48482300 | -5.71172600 | -8.70287900  |
| C | 1.84566100 | -6.86391700 | -7.98815800  |
| C | 2.90427500 | -6.85989300 | -7.07315300  |
| C | 3.63685900 | -5.68925400 | -6.84777300  |
| H | 5.61111700 | -1.13555200 | -7.94606900  |
| H | 4.45731500 | -0.67426800 | -6.70025300  |
| H | 1.17835500 | -3.54968100 | -10.94176400 |
| H | 0.05024500 | -3.08944300 | -9.63809800  |
| H | 1.19308200 | -1.88744600 | -10.29474000 |
| H | 0.66175400 | -5.73007900 | -9.40939900  |
| H | 1.28533200 | -7.77977200 | -8.15328800  |
| H | 3.15734700 | -7.76892900 | -6.53650500  |
| H | 4.46134200 | -5.66782500 | -6.14153100  |

TS3A

%chk=TS3A.chk

# opt=(calcall,ts,noeigen,maxstep=3,notrust,gdiis,cartesian) freq

b3lyp/6-31g(d) scrf=(solvent=dichloromethane)

Title Card Required

0 1

|   |             |             |             |
|---|-------------|-------------|-------------|
| C | -4.14307800 | -0.89703700 | 1.19176300  |
| C | -5.01324400 | -1.83579800 | 1.98384900  |
| C | -3.30269100 | -3.43670200 | 1.66385300  |
| O | -4.70580800 | -3.19262000 | 1.72635000  |
| N | -2.96028900 | -1.30756600 | 0.62016900  |
| C | -2.32496800 | -0.17907300 | 0.17183300  |
| N | -4.31388700 | 0.39070600  | 1.07663800  |
| N | -3.18160700 | 0.83334700  | 0.43100000  |
| C | -3.01134900 | 2.25535800  | 0.24619300  |
| C | -3.44023700 | 2.84020100  | -0.95562600 |
| C | -2.50653600 | 3.00185100  | 1.32102500  |
| C | -3.32248900 | 4.22750400  | -1.06905700 |
| C | -2.41296300 | 4.38773100  | 1.15251500  |
| C | -2.81437000 | 5.01760500  | -0.03032300 |
| C | -4.00709300 | 2.01442800  | -2.08352400 |
| C | -2.09957500 | 2.35087300  | 2.62139400  |
| C | -2.73337700 | 6.51866600  | -0.17694500 |
| C | -2.65971900 | -2.76209800 | 0.43860400  |
| C | -3.09481000 | -3.31361000 | -0.97000200 |
| C | -2.86516100 | -4.84217500 | -0.96334000 |
| C | -4.56892500 | -3.02229500 | -1.31408500 |
| C | -2.20407100 | -2.70979900 | -2.07637500 |
| C | -1.00835500 | -0.09152000 | -0.43098100 |

|   |             |             |             |
|---|-------------|-------------|-------------|
| C | 0.03177700  | -0.84424700 | 0.01520500  |
| C | 1.33436000  | -1.03305100 | -0.64272400 |
| O | -0.95175600 | 0.75245300  | -1.51979600 |
| C | 2.14363000  | 1.42597700  | -0.39304000 |
| C | 2.85290000  | 1.82445800  | -1.54007000 |
| C | 3.74385900  | -0.22504100 | -0.99062800 |
| C | 2.59540400  | 0.03710200  | 0.03365200  |
| N | 3.75691900  | 0.82094000  | -1.90429100 |
| O | 4.50059500  | -1.18604600 | -1.05768000 |
| N | 2.76075500  | -0.14494900 | 1.39502200  |
| C | 4.03964400  | -0.57468700 | 1.88454800  |
| C | 4.98708000  | 0.58477400  | 2.17973200  |
| F | 6.18757900  | 0.14868300  | 2.65900500  |
| F | 5.26255200  | 1.32510100  | 1.07228600  |
| F | 4.49932100  | 1.44756100  | 3.10456700  |
| C | 4.70021300  | 0.91418800  | -3.00032900 |
| C | 2.65851600  | 3.06622100  | -2.13896800 |
| C | 1.73009200  | 3.93631900  | -1.54906500 |
| C | 1.04261000  | 3.57426300  | -0.38842600 |
| C | 1.26002900  | 2.31624400  | 0.20245100  |
| C | 2.56167500  | -5.16870600 | -0.31174700 |
| C | 2.40246900  | -4.57708100 | -1.56859000 |
| C | 2.01116300  | -3.24196600 | -1.67127600 |
| C | 1.76620000  | -2.46998900 | -0.52397500 |
| C | 1.92283000  | -3.07679300 | 0.73445600  |
| C | 2.32626200  | -4.41015500 | 0.83715100  |
| H | -4.87132600 | -1.60224900 | 3.05081900  |
| H | -6.06561600 | -1.67938300 | 1.73746700  |
| H | -2.80848900 | -3.07597000 | 2.57805200  |
| H | -3.17837900 | -4.51704000 | 1.61403200  |

|   |             |             |             |
|---|-------------|-------------|-------------|
| H | -3.64394800 | 4.70364400  | -1.99229900 |
| H | -2.02344700 | 4.98730500  | 1.97154400  |
| H | -3.23305000 | 1.37663400  | -2.52393700 |
| H | -4.81747800 | 1.36259700  | -1.73755600 |
| H | -4.40584400 | 2.66065500  | -2.86995500 |
| H | -2.95664600 | 1.87471300  | 3.11196100  |
| H | -1.34050900 | 1.57461900  | 2.47075800  |
| H | -1.68665300 | 3.09283500  | 3.30934500  |
| H | -3.71920100 | 6.97944000  | -0.03284400 |
| H | -2.05350900 | 6.95716600  | 0.55959300  |
| H | -2.38766600 | 6.80332500  | -1.17644400 |
| H | -1.58005300 | -2.88568100 | 0.52722000  |
| H | -1.85170100 | -5.09960600 | -0.63224300 |
| H | -3.58268200 | -5.36788400 | -0.32566100 |
| H | -2.98821800 | -5.23008100 | -1.97985200 |
| H | -5.25490400 | -3.47066600 | -0.59262800 |
| H | -4.77154500 | -1.94585100 | -1.36359000 |
| H | -4.79318800 | -3.43534200 | -2.30388300 |
| H | -2.33707200 | -1.62852600 | -2.17942100 |
| H | -1.14181100 | -2.90772200 | -1.89805700 |
| H | -2.47395000 | -3.16062100 | -3.03786600 |
| H | 1.25806300  | -0.74177400 | -1.69555200 |
| H | -0.15313300 | 1.30676000  | -1.42626000 |
| H | 3.92273000  | -1.08736400 | 2.85313500  |
| H | 4.61071600  | -1.25248600 | 1.23352300  |
| H | 4.17636300  | 1.02003000  | -3.95691300 |
| H | 5.37263600  | 1.77027800  | -2.86871200 |
| H | 5.28491700  | -0.00658600 | -3.00632800 |
| H | -0.12626700 | -1.38299500 | 0.94384100  |
| H | 3.21230600  | 3.36095000  | -3.02516000 |



|   |            |             |             |
|---|------------|-------------|-------------|
| H | 1.55622100 | 4.91032100  | -1.99838400 |
| H | 0.34012700 | 4.26671100  | 0.06493100  |
| H | 0.76446200 | 2.04053400  | 1.12780600  |
| H | 2.86311600 | -6.20980900 | -0.23021800 |
| H | 2.58341500 | -5.15610000 | -2.47088400 |
| H | 1.89690600 | -2.78808500 | -2.65331300 |
| H | 1.76350400 | -2.47885500 | 1.62609300  |
| H | 2.45202100 | -4.85925000 | 1.81960700  |

TS3B

%chk=TS3B.chk

# opt=(calcfc,ts,noeigen,maxstep=3,notrust,gdiis,cartesian) freq

b3lyp/6-31g(d) scrf=(solvent=dichloromethane) nosymm

Title Card Required

0 1

|   |             |            |             |
|---|-------------|------------|-------------|
| C | 3.43257200  | 2.24968600 | -2.45368400 |
| C | 4.57479700  | 3.22930600 | -2.48012400 |
| C | 5.89418900  | 1.41222400 | -3.21615500 |
| O | 5.82639300  | 2.57680400 | -2.39477700 |
| N | 3.62557600  | 0.89946600 | -2.64419100 |
| C | 2.39091300  | 0.34058800 | -2.74332300 |
| N | 2.16119500  | 2.54844700 | -2.39277500 |
| N | 1.52178000  | 1.34921700 | -2.57383700 |
| C | 0.07792300  | 1.28847700 | -2.61052200 |
| C | -0.60550800 | 1.10389700 | -1.39645500 |
| C | -0.57459100 | 1.45585200 | -3.84055300 |
| C | -1.99971900 | 1.07436400 | -1.44568700 |
| C | -1.97437900 | 1.41645300 | -3.82646700 |

|   |             |             |             |
|---|-------------|-------------|-------------|
| C | -2.70151900 | 1.22137000  | -2.64960500 |
| C | 0.12959200  | 0.94090500  | -0.08859200 |
| C | 0.16275900  | 1.65773100  | -5.14293400 |
| C | -4.21003800 | 1.15573900  | -2.67209400 |
| C | 4.98896700  | 0.28706500  | -2.68021600 |
| C | 5.41868700  | -0.35178000 | -1.30927800 |
| C | 6.88885400  | -0.80890800 | -1.44615200 |
| C | 5.29574500  | 0.61980900  | -0.11858700 |
| C | 4.56121600  | -1.59876000 | -1.01617700 |
| C | 2.01387000  | -1.03876000 | 3.07570600  |
| C | 2.15815800  | -1.57447600 | -4.30447100 |
| C | 1.58405000  | -2.89440900 | -4.61313800 |
| O | 1.37123000  | -1.65974200 | -2.03629200 |
| C | 2.63741800  | -3.78243200 | -7.59872400 |
| C | 1.45500900  | -4.54403500 | -7.78496400 |
| C | 0.70378600  | -2.43593800 | -7.28003200 |
| C | 2.21552300  | -2.39529900 | -7.34616700 |
| N | 0.33114700  | -3.73741800 | -7.60900800 |
| O | -0.08577500 | -1.51268400 | -7.08994200 |
| N | 2.79402200  | -1.23062100 | -7.41772700 |
| C | 4.18295600  | -1.14593000 | -7.81758400 |
| C | 5.13164500  | -0.89794400 | -6.66104200 |
| F | 6.39581100  | -0.70703100 | -7.09833600 |
| F | 4.78471500  | 0.20957100  | -5.95412000 |
| F | 5.16717000  | -1.92591800 | -5.77710200 |
| C | -1.04297900 | -4.18645200 | -7.67567500 |
| C | 1.48998700  | -5.89950600 | -8.09182200 |
| C | 2.74279300  | -6.51821900 | -8.19535800 |
| C | 3.91977500  | -5.79944600 | -7.96930600 |
| C | 3.87294600  | -4.43459600 | -7.66100400 |

|   |             |             |             |
|---|-------------|-------------|-------------|
| C | 3.21612600  | -6.69996200 | -3.47446300 |
| C | 1.88193800  | -6.57301600 | -3.88618200 |
| C | 1.35908800  | -5.33842800 | -4.24753200 |
| C | 2.14588100  | -4.14775300 | -4.21696400 |
| C | 3.50593800  | -4.31027000 | -3.81724500 |
| C | 4.01652600  | -5.55063800 | -3.45031200 |
| H | 4.49862500  | 3.81043400  | -3.41217300 |
| H | 4.50231400  | 3.92219400  | -1.63865900 |
| H | 5.60658100  | 1.65201100  | -4.24732300 |
| H | 6.93521500  | 1.09417700  | -3.21818000 |
| H | -2.55183400 | 0.93644400  | -0.51921400 |
| H | -2.50535100 | 1.54724500  | -4.76616800 |
| H | 0.71880300  | 0.01689500  | -0.08538100 |
| H | 0.81725600  | 1.77405800  | 0.09668400  |
| H | -0.57669900 | 0.89488000  | 0.74440700  |
| H | 1.10766200  | 2.19116900  | -5.00639200 |
| H | 0.38004300  | 0.69898600  | -5.63058100 |
| H | -0.45253500 | 2.24017900  | -5.83515400 |
| H | -4.64367600 | 1.62666400  | -1.78362500 |
| H | -4.61908500 | 1.64973500  | -3.55865000 |
| H | -4.55473500 | 0.11360300  | -2.68752600 |
| H | 4.95135400  | -0.50253400 | -3.43395700 |
| H | 7.04304900  | -1.41966200 | -2.34409300 |
| H | 7.58687900  | 0.03352700  | -1.47684000 |
| H | 7.15774800  | -1.42239100 | -0.58007800 |
| H | 5.92057900  | 1.50623000  | -0.24503300 |
| H | 4.25995600  | 0.94496500  | 0.03609600  |
| H | 5.60932600  | 0.10533300  | 0.79662800  |
| H | 3.50707600  | -1.35942300 | -0.85377000 |
| H | 4.61746500  | -2.33478200 | -1.82522000 |

|   |             |             |             |
|---|-------------|-------------|-------------|
| H | 4.92702600  | -2.07941400 | -0.10202600 |
| H | 0.52712700  | -2.89274400 | -4.86968700 |
| H | 1.05374200  | -2.50861900 | -2.41962500 |
| H | 4.56284600  | -2.01836700 | -8.36329100 |
| H | 4.30174300  | -0.27493900 | -8.47531500 |
| H | -1.27055500 | -4.60419100 | -8.66304300 |
| H | -1.25051300 | -4.94784300 | -6.91426700 |
| H | -1.67809100 | -3.31721100 | -7.49862900 |
| H | 2.59996800  | -0.95512300 | -5.09460600 |
| H | 0.57602500  | -6.46633600 | -8.23978500 |
| H | 2.79372700  | -7.57641400 | -8.43701000 |
| H | 4.88059400  | -6.30328700 | -8.02191200 |
| H | 4.79444100  | -3.90856600 | -7.44108100 |
| H | 3.62076400  | -7.66671000 | -3.18772500 |
| H | 1.24017600  | -7.45179800 | -3.91873700 |
| H | 0.31530700  | -5.26351600 | -4.54709100 |
| H | 4.15892500  | -3.44216500 | -3.82353700 |
| H | 5.06020000  | -5.62553300 | -3.14944200 |

TS3C

%chk=TS3C.chk

# opt=(calcfc,ts,noeigen,maxstep=5,notrust,gdiis,cartesian) freq

b3lyp/6-31g(d) scrf=(solvent=dichloromethane) nosymm

Title Card Required

0 1

|   |            |            |             |
|---|------------|------------|-------------|
| C | 3.05102100 | 2.32094600 | -2.49162400 |
| C | 4.09543900 | 3.40371700 | -2.53863600 |

|   |             |             |             |
|---|-------------|-------------|-------------|
| C | 5.51027300  | 1.77267600  | -3.49915000 |
| O | 5.40558200  | 2.87309400  | -2.59813100 |
| N | 3.33673800  | 1.01764200  | -2.83301700 |
| C | 2.14509500  | 0.35437400  | -2.88205900 |
| N | 1.77632900  | 2.49346900  | -2.27354600 |
| N | 1.21840500  | 1.25829000  | -2.51198700 |
| C | -0.21849600 | 1.11598900  | -2.47030100 |
| C | -0.82639200 | 0.78544900  | -1.24905500 |
| C | -0.94285900 | 1.36911900  | -3.64362900 |
| C | -2.21897200 | 0.68919600  | -1.23341400 |
| C | -2.33624100 | 1.25336200  | -3.56941400 |
| C | -2.99029700 | 0.91572600  | -2.38105800 |
| C | -0.01336800 | 0.53236700  | -0.00381500 |
| C | -0.26586200 | 1.76124000  | -4.93539000 |
| C | -4.49680600 | 0.82351800  | -2.32244100 |
| C | 4.74512700  | 0.53990900  | -2.98413800 |
| C | 5.31090700  | -0.13985400 | -1.68307500 |
| C | 6.80675500  | -0.44328400 | -1.92627600 |
| C | 5.16854700  | 0.73841800  | -0.42396600 |
| C | 4.59447000  | -1.48292900 | -1.42779900 |
| C | 1.89930700  | -1.02936100 | -3.27004700 |
| C | 2.48714900  | -1.54982700 | -4.37124100 |
| C | 2.34044600  | -2.87145900 | -4.99694700 |
| O | 1.02557900  | -1.65138400 | -2.40753400 |
| C | 2.70239200  | -3.88109800 | -7.45901700 |
| C | 1.55089000  | -3.87877400 | -8.27073300 |
| C | 1.56319300  | -1.79066600 | -7.31717000 |
| C | 2.80965900  | -2.51921400 | -6.79197800 |
| N | 0.89591100  | -2.64269700 | -8.17445100 |
| O | 1.19101300  | -0.65214600 | -7.04943700 |

|   |             |             |             |
|---|-------------|-------------|-------------|
| N | 3.90113300  | -1.69020600 | -6.83760600 |
| C | 5.21123700  | -2.27864000 | -6.78760300 |
| C | 5.91413400  | -2.27059100 | -8.14087500 |
| F | 7.17463500  | -2.78305300 | -8.04305000 |
| F | 5.27251600  | -2.99958800 | -9.08246500 |
| F | 6.04676000  | -1.01861600 | -8.64135500 |
| C | -0.33376500 | -2.29973100 | -8.85841100 |
| C | 1.16108700  | -4.97975000 | -9.02650800 |
| C | 1.95402300  | -6.13303300 | -8.95908100 |
| C | 3.08789000  | -6.16928900 | -8.14759800 |
| C | 3.45950800  | -5.04638000 | -7.39074600 |
| C | -1.24705500 | -5.21331100 | -4.40728600 |
| C | 0.01549600  | -5.81559600 | -4.36669900 |
| C | 1.16820500  | -5.05394600 | -4.54046500 |
| C | 1.10406100  | -3.66198400 | -4.76437800 |
| C | -0.18123300 | -3.07317300 | -4.81560700 |
| C | -1.33651200 | -3.83903000 | -4.63431800 |
| H | 3.88940800  | 4.03013600  | -3.42053500 |
| H | 4.03138700  | 4.03453400  | -1.64929400 |
| H | 5.12614800  | 2.05031600  | -4.49140300 |
| H | 6.57162100  | 1.55088600  | -3.59582500 |
| H | -2.71372000 | 0.43116700  | -0.29996400 |
| H | -2.92190100 | 1.44179600  | -4.46579800 |
| H | 0.60835100  | -0.36222900 | -0.12231300 |
| H | 0.65401700  | 1.37234700  | 0.22038100  |
| H | -0.66759300 | 0.38051600  | 0.85874300  |
| H | 0.41984400  | 2.60299300  | -4.78527900 |
| H | 0.31263300  | 0.93659700  | -5.36834100 |
| H | -1.01116300 | 2.06495700  | -5.67560400 |
| H | -4.92383600 | 1.69533600  | -1.81029600 |

|   |             |             |             |
|---|-------------|-------------|-------------|
| H | -4.93439000 | 0.78078600  | -3.32423300 |
| H | -4.82032400 | -0.06473700 | -1.76867500 |
| H | 4.74724100  | -0.20207700 | -3.78412800 |
| H | 6.96439300  | -0.98332300 | -2.86803400 |
| H | 7.41838200  | 0.46412100  | -1.94168700 |
| H | 7.18376100  | -1.07601900 | -1.11609400 |
| H | 5.69793300  | 1.68800100  | -0.52527800 |
| H | 4.11824500  | 0.95009100  | -0.19086800 |
| H | 5.58554500  | 0.20230000  | 0.43590200  |
| H | 3.53284100  | -1.35762200 | -1.19583500 |
| H | 4.67577800  | -2.15752000 | -2.28693900 |
| H | 5.05747900  | -1.97710300 | -0.56642100 |
| H | 3.23291500  | -3.47773400 | -4.80584100 |
| H | 0.58788100  | -2.38274800 | -2.88725300 |
| H | 5.88032600  | -1.68844100 | -6.13828300 |
| H | 5.28474200  | -3.31566100 | -6.42305100 |
| H | -0.21021800 | -2.37523500 | -9.94467100 |
| H | -1.15159200 | -2.96067600 | -8.54840200 |
| H | -0.57892200 | -1.27055100 | -8.59277200 |
| H | 3.16823900  | -0.91409100 | -4.94435800 |
| H | 0.26933900  | -4.95250900 | -9.64525900 |
| H | 1.67362700  | -7.00725600 | -9.54058200 |
| H | 3.68798300  | -7.07349800 | -8.09395000 |
| H | 4.33310000  | -5.11093600 | -6.75004100 |
| H | -2.14527300 | -5.80780700 | -4.26565500 |
| H | 0.10130500  | -6.88523200 | -4.19168600 |
| H | 2.14167500  | -5.53607300 | -4.50287900 |
| H | -0.27111700 | -2.01153100 | -5.03183700 |
| H | -2.30913700 | -3.35516900 | -4.67714000 |

TS3D

%chk=TS3D.chk

# opt=(calcf,ts,noeigen,maxstep=5,notrust,gdiis,cartesian) freq

b3lyp/6-31g(d) scrf=(solvent=dichloromethane) nosymm

Title Card Required

0 1

|   |             |             |             |
|---|-------------|-------------|-------------|
| C | 4.55537900  | -4.00366000 | -0.21737900 |
| C | 3.70544900  | -4.54862600 | 0.89887600  |
| C | 1.86023400  | -3.70637200 | -0.30394400 |
| O | 2.45448600  | -3.89468500 | 0.97862700  |
| N | 4.01906800  | -3.26591700 | -1.25071300 |
| C | 5.01369600  | -3.10428100 | -2.17352200 |
| N | 5.81872000  | -4.26147900 | -0.41223900 |
| N | 6.10156900  | -3.68988200 | -1.63153400 |
| C | 7.41602500  | -3.87741100 | -2.20081600 |
| C | 8.42579000  | -2.95755700 | -1.88254000 |
| C | 7.63558100  | -5.00515800 | -3.00445200 |
| C | 9.69500600  | -3.19054400 | -2.41792800 |
| C | 8.92375100  | -5.18606200 | -3.51815000 |
| C | 9.96412200  | -4.29425400 | -3.23640500 |
| C | 8.15595600  | -1.75501900 | -1.01300200 |
| C | 6.53582700  | -5.99661400 | -3.29997300 |
| C | 11.35427500 | -4.53147200 | -3.77711100 |
| C | 2.64161200  | -2.68685500 | -1.15274400 |
| C | 2.63504600  | -1.19963600 | -0.63875700 |
| C | 1.16156100  | -0.78747200 | -0.41946600 |
| C | 3.41791100  | -1.00407500 | 0.67495200  |
| C | 3.23107000  | -0.26109100 | -1.70958600 |



|   |             |             |              |
|---|-------------|-------------|--------------|
| C | 4.94799200  | -2.46116300 | -3.47768000  |
| C | 3.89269300  | -2.65574100 | -4.30931000  |
| C | 3.62287300  | -2.13178000 | -5.65386300  |
| O | 6.05862400  | -1.68346100 | -3.70351900  |
| C | 3.39169600  | -4.32627000 | -7.30676500  |
| C | 3.21005700  | -4.02129100 | -8.67000400  |
| C | 1.91495900  | -2.47595900 | -7.57349500  |
| C | 2.53836900  | -3.37803100 | -6.48549700  |
| N | 2.33556300  | -2.93420900 | -8.80694900  |
| O | 1.17619500  | -1.51288600 | -7.40594800  |
| N | 1.56289600  | -3.82154500 | -5.61985800  |
| C | 1.74993000  | -5.11779100 | -5.04296900  |
| C | 0.62874900  | -5.39513400 | -4.06227000  |
| F | 0.78722500  | -6.60787200 | -3.46655100  |
| F | 0.58363100  | -4.48069100 | -3.05111400  |
| F | -0.59411900 | -5.39680600 | -4.63196000  |
| C | 1.94017100  | -2.33848000 | -10.06703400 |
| C | 3.83842500  | -4.73396600 | -9.68599000  |
| C | 4.67843900  | -5.79431800 | -9.31772500  |
| C | 4.87544400  | -6.11610200 | -7.97479700  |
| C | 4.23096200  | -5.38095800 | -6.96595100  |
| C | 6.77094200  | -0.57213700 | -8.17624000  |
| C | 5.55205700  | 0.10316800  | -8.04647400  |
| C | 4.55137600  | -0.39818500 | -7.21758800  |
| C | 4.73100600  | -1.59361100 | -6.48967500  |
| C | 5.95940000  | -2.27353800 | -6.65120000  |
| C | 6.96646100  | -1.76317900 | -7.47606100  |
| H | 3.56906700  | -5.62710900 | 0.72128600   |
| H | 4.21231900  | -4.42194200 | 1.85800100   |
| H | 1.80142900  | -4.65955500 | -0.84600200  |

|   |             |             |              |
|---|-------------|-------------|--------------|
| H | 0.84481400  | -3.35541900 | -0.12933000  |
| H | 10.49344300 | -2.48851700 | -2.18991100  |
| H | 9.11692500  | -6.05052000 | -4.14864400  |
| H | 7.46173700  | -1.06712700 | -1.50890100  |
| H | 7.70979500  | -2.04142400 | -0.05386500  |
| H | 9.08279200  | -1.21329400 | -0.80690200  |
| H | 6.13178200  | -6.43227000 | -2.37867500  |
| H | 5.69976900  | -5.52680400 | -3.83130900  |
| H | 6.91154300  | -6.81283700 | -3.92215200  |
| H | 11.96565900 | -5.08744200 | -3.05428700  |
| H | 11.32960000 | -5.11606000 | -4.70200000  |
| H | 11.87037900 | -3.58749500 | -3.97992000  |
| H | 2.20561700  | -2.70464600 | -2.15190000  |
| H | 0.54339400  | -1.00392600 | -1.29901500  |
| H | 0.71592800  | -1.28433300 | 0.44787600   |
| H | 1.11153100  | 0.29116200  | -0.23796300  |
| H | 3.01117400  | -1.60926900 | 1.48779200   |
| H | 4.48037600  | -1.24882500 | 0.55774100   |
| H | 3.36354200  | 0.04957200  | 0.97088100   |
| H | 4.29460900  | -0.44532500 | -1.88784000  |
| H | 2.70543300  | -0.34969900 | -2.66645900  |
| H | 3.13602700  | 0.77592300  | -1.36885700  |
| H | 2.81020700  | -1.40179100 | -5.57426000  |
| H | 6.14327500  | -1.52454500 | -4.66509800  |
| H | 1.73217400  | -5.96381400 | -5.75969000  |
| H | 2.68102400  | -5.27160300 | -4.45345000  |
| H | 2.81283700  | -1.95582500 | -10.60875400 |
| H | 1.42250200  | -3.06826600 | -10.69990900 |
| H | 1.26487800  | -1.51260100 | -9.83951800  |
| H | 3.06007200  | -3.24464800 | -3.93185000  |

|   |            |             |              |
|---|------------|-------------|--------------|
| H | 3.68681800 | -4.48147700 | -10.73098400 |
| H | 5.18046900 | -6.36812200 | -10.09216500 |
| H | 5.53088700 | -6.93944200 | -7.70462300  |
| H | 4.40078300 | -5.63847500 | -5.92499500  |
| H | 7.55333200 | -0.17651600 | -8.81780600  |
| H | 5.38450900 | 1.03052600  | -8.58859900  |
| H | 3.60866700 | 0.13476800  | -7.12540900  |
| H | 6.11216200 | -3.22676500 | -6.15182000  |
| H | 7.90186400 | -2.30783100 | -7.57602900  |

M3

%mem=128GB

%nprocshared=32

%chk=C:\Users\win\Desktop\szu\coord\M3C.chk

# opt=(maxstep=5,notrust,gdiis,cartesian) freq b3lyp/6-31g(d)

scrf=(solvent=dichloromethane) nosymm

Title Card Required

0 1

|   |             |            |             |
|---|-------------|------------|-------------|
| C | 2.94320400  | 2.29195200 | -2.53380200 |
| C | 3.99258500  | 3.36363100 | -2.66447700 |
| C | 5.18896300  | 1.80654600 | -3.97909400 |
| O | 5.26134800  | 2.82084700 | -2.97439500 |
| N | 3.14149500  | 1.02385000 | -3.02803600 |
| C | 1.95684300  | 0.37032600 | -2.90474400 |
| N | 1.72827100  | 2.44509900 | -2.07382000 |
| N | 1.12210400  | 1.23362000 | -2.30419100 |
| C | -0.27436500 | 1.05029400 | -1.98429000 |
| C | -0.61571300 | 0.60941300 | -0.69677300 |

|   |             |             |             |
|---|-------------|-------------|-------------|
| C | -1.22609500 | 1.35552400  | -2.96793900 |
| C | -1.97572200 | 0.46823900  | -0.41063900 |
| C | -2.57241800 | 1.19250700  | -2.62655200 |
| C | -2.96659800 | 0.75408800  | -1.35798000 |
| C | 0.43586600  | 0.28290300  | 0.33470600  |
| C | -0.82584600 | 1.83919900  | -4.34101000 |
| C | -4.42886500 | 0.61742000  | -1.00607100 |
| C | 4.49563800  | 0.54023400  | -3.45479100 |
| C | 5.23811200  | -0.24282200 | -2.30376800 |
| C | 6.73404400  | -0.35324600 | -2.67539000 |
| C | 5.12127100  | 0.43946600  | -0.92615100 |
| C | 4.66879000  | -1.67572800 | -2.20965800 |
| C | 1.66418600  | -0.97567600 | -3.38069600 |
| C | 2.01360100  | -1.34850800 | -4.62407400 |
| C | 1.91357300  | -2.76345600 | -5.13226600 |
| O | 1.09372600  | -1.77890000 | -2.41797200 |
| C | 2.82367200  | -4.30374000 | -6.96553400 |
| C | 2.25680800  | -4.31720300 | -8.24810900 |
| C | 2.14617900  | -2.11186400 | -7.60160900 |
| C | 2.82840400  | -2.87707600 | -6.40491000 |
| N | 1.85150900  | -3.01620500 | -8.60223800 |
| O | 1.93249400  | -0.90332500 | -7.68503100 |
| N | 4.09718100  | -2.34890900 | -6.00260300 |
| C | 4.99938900  | -2.20621300 | -7.10398200 |
| C | 6.29349800  | -1.55920700 | -6.66296800 |
| F | 7.16813000  | -1.44262100 | -7.69855300 |
| F | 6.11996500  | -0.29651100 | -6.17735000 |
| F | 6.94145400  | -2.25240600 | -5.69328500 |
| C | 1.27070400  | -2.65059900 | -9.87832400 |
| C | 2.16331700  | -5.47986900 | -9.00697900 |

|   |             |             |             |
|---|-------------|-------------|-------------|
| C | 2.66723800  | -6.66331700 | -8.44599500 |
| C | 3.25179000  | -6.66627200 | -7.17752700 |
| C | 3.33787500  | -5.47684600 | -6.43536300 |
| C | -2.16632000 | -4.23770200 | -5.42548100 |
| C | -1.18447900 | -4.99376800 | -4.78443200 |
| C | 0.12468200  | -4.51196100 | -4.69744800 |
| C | 0.47781100  | -3.26913200 | -5.24682900 |
| C | -0.52465400 | -2.51518500 | -5.88196000 |
| C | -1.83054900 | -2.99665100 | -5.97442500 |
| H | 3.66435100  | 4.06261600  | -3.44987900 |
| H | 4.08546400  | 3.92055200  | -1.72939900 |
| H | 4.64979000  | 2.18137500  | -4.86137300 |
| H | 6.21073300  | 1.58450400  | -4.27783100 |
| H | -2.26706600 | 0.12461100  | 0.57893800  |
| H | -3.33003000 | 1.41867000  | -3.37269700 |
| H | 1.01946600  | -0.59374500 | 0.03047200  |
| H | 1.13636900  | 1.11359100  | 0.47612400  |
| H | -0.02764900 | 0.06274300  | 1.29984600  |
| H | -0.18462200 | 2.72613700  | -4.28427100 |
| H | -0.27209300 | 1.07035600  | -4.89312500 |
| H | -1.71027400 | 2.09890400  | -4.92815000 |
| H | -4.78933800 | 1.51097900  | -0.47996500 |
| H | -5.04578600 | 0.49234500  | -1.90111200 |
| H | -4.60207100 | -0.23865200 | -0.34570200 |
| H | 4.35449600  | -0.14204300 | -4.29861400 |
| H | 6.87599200  | -0.77261400 | -3.67536800 |
| H | 7.24336300  | 0.61457200  | -2.62283900 |
| H | 7.22887900  | -1.02060500 | -1.96149200 |
| H | 5.53298400  | 1.45210700  | -0.93634900 |
| H | 4.08431900  | 0.48625500  | -0.57264000 |

|   |             |             |              |
|---|-------------|-------------|--------------|
| H | 5.68166300  | -0.14613700 | -0.18856300  |
| H | 3.63923800  | -1.69270800 | -1.83843600  |
| H | 4.68777800  | -2.17457200 | -3.18525800  |
| H | 5.27318400  | -2.25885800 | -1.50495600  |
| H | 2.42827800  | -3.39996300 | -4.39832700  |
| H | 0.60960300  | -2.49699100 | -2.86501300  |
| H | 5.32026200  | -3.15503200 | -7.59715700  |
| H | 4.64907200  | -1.56126600 | -7.94432800  |
| H | 1.94474200  | -2.90794800 | -10.70380800 |
| H | 0.31366100  | -3.16189300 | -10.03278700 |
| H | 1.10784700  | -1.57183200 | -9.86661200  |
| H | 2.41104800  | -0.61210400 | -5.30780000  |
| H | 1.72073700  | -5.47923600 | -9.99870200  |
| H | 2.60700400  | -7.58695800 | -9.01576700  |
| H | 3.64662800  | -7.59157400 | -6.76633400  |
| H | 3.81358800  | -5.46683900 | -5.45710500  |
| H | -3.18529000 | -4.60880200 | -5.49447900  |
| H | -1.43297900 | -5.95908600 | -4.35146400  |
| H | 0.88653800  | -5.11141300 | -4.20490200  |
| H | -0.27454100 | -1.54939000 | -6.31082700  |
| H | -2.58942900 | -2.39930200 | -6.47314200  |

TS4

%mem=128GB

%nprocshared=32

%chk=TS4.chk

# opt=(calcfc,ts,noeigen,maxstep=5,notrust,gdiis,cartesian) freq

b3lyp/6-31g(d) scrf=(solvent=dichloromethane) nosymm int=superfine

Title Card Required

0 1

|   |             |             |             |
|---|-------------|-------------|-------------|
| C | 1.92924800  | 1.99816800  | -3.10302200 |
| C | 2.05552600  | 3.32259900  | -3.80745400 |
| C | 3.95263800  | 2.39134000  | -4.87387900 |
| O | 3.37381300  | 3.54982400  | -4.27257300 |
| N | 2.87884900  | 1.01194900  | -3.24681700 |
| C | 2.38421200  | -0.10981500 | -2.65258300 |
| N | 0.89945100  | 1.57707200  | -2.42126000 |
| N | 1.19725900  | 0.26287600  | -2.13261300 |
| C | 0.26263000  | -0.53034000 | -1.37100500 |
| C | 0.50044200  | -0.72172300 | -0.00090300 |
| C | -0.87830600 | -1.02517000 | -2.02212800 |
| C | -0.44400100 | -1.46349600 | 0.71525200  |
| C | -1.78805700 | -1.75925700 | -1.25637200 |
| C | -1.58627700 | -1.99575600 | 0.10806600  |
| C | 1.72280000  | -0.16236400 | 0.68240100  |
| C | -1.12749300 | -0.77497600 | -3.48876100 |
| C | -2.57036600 | -2.82170300 | 0.90201000  |
| C | 4.22023800  | 1.28809000  | -3.83656500 |
| C | 5.30509900  | 1.61284100  | -2.73983000 |
| C | 6.54819400  | 2.20024700  | -3.44453800 |
| C | 4.81178900  | 2.61528800  | -1.67712000 |
| C | 5.73481700  | 0.30873500  | -2.03501900 |
| C | 2.94666500  | -1.45682600 | -2.69550300 |
| C | 3.13247100  | -2.29957400 | -3.72869800 |
| C | 2.84735500  | -2.13652500 | -5.19741000 |
| O | 3.28091400  | -2.05642200 | -1.51907700 |
| C | 3.88116800  | -2.22206200 | -7.54585400 |
| C | 3.73993200  | -3.40248600 | -8.29206600 |
| C | 4.20958900  | -4.13298100 | -6.16499900 |

|   |             |             |              |
|---|-------------|-------------|--------------|
| C | 4.09251600  | -2.57767100 | -6.08905900  |
| N | 3.91588100  | -4.51911400 | -7.45828800  |
| O | 4.54235400  | -4.88972000 | -5.26370900  |
| N | 5.27818900  | -1.94614700 | -5.50603500  |
| C | 6.54531600  | -2.32896700 | -6.11775500  |
| C | 7.64918700  | -1.38629100 | -5.68886600  |
| F | 8.83097800  | -1.75610100 | -6.22856700  |
| F | 7.41610500  | -0.10924200 | -6.06944000  |
| F | 7.80860500  | -1.37595300 | -4.34222300  |
| C | 3.91992200  | -5.89812700 | -7.90729900  |
| C | 3.49222300  | -3.38113800 | -9.66081100  |
| C | 3.40057000  | -2.12852800 | -10.28448800 |
| C | 3.55726300  | -0.94517400 | -9.55958500  |
| C | 3.79860900  | -0.99010300 | -8.17731500  |
| C | -0.80786000 | -4.16308600 | -6.41474200  |
| C | -0.47725900 | -2.91769200 | -6.95145900  |
| C | 0.69830000  | -2.27403700 | -6.55577600  |
| C | 1.56404200  | -2.85850300 | -5.61966900  |
| C | 1.21534700  | -4.10730900 | -5.08150300  |
| C | 0.04415400  | -4.75443000 | -5.47782600  |
| H | 3.48981500  | -2.94618900 | -2.40682500  |
| H | 5.27790600  | -2.18874300 | -4.51304500  |
| H | 1.34220000  | 3.32946600  | -4.64656900  |
| H | 1.79588700  | 4.14178300  | -3.13325100  |
| H | 3.29097100  | 2.00079900  | -5.66172200  |
| H | 4.88135400  | 2.71557000  | -5.33984400  |
| H | -0.28111700 | -1.62432500 | 1.77824600   |
| H | -2.67764800 | -2.15425000 | -1.74105800  |
| H | 2.61983500  | -0.67773800 | 0.32052100   |
| H | 1.84427600  | 0.90898600  | 0.48283700   |



|   |             |             |              |
|---|-------------|-------------|--------------|
| H | 1.65324000  | -0.29830600 | 1.76515400   |
| H | -2.05740500 | -1.25376200 | -3.80644400  |
| H | -1.20512700 | 0.29687700  | -3.70387100  |
| H | -0.31772700 | -1.17646100 | -4.10774300  |
| H | -2.57126800 | -2.53676300 | 1.95892100   |
| H | -3.58864600 | -2.71300500 | 0.51475500   |
| H | -2.31495900 | -3.88830000 | 0.85159600   |
| H | 4.52792200  | 0.38439000  | -4.37184900  |
| H | 6.88190100  | 1.56767100  | -4.27420000  |
| H | 6.37004700  | 3.21182100  | -3.82400200  |
| H | 7.37216800  | 2.26202800  | -2.72540800  |
| H | 4.50806400  | 3.56602700  | -2.12190900  |
| H | 3.97334600  | 2.21721900  | -1.09397500  |
| H | 5.62497200  | 2.81551000  | -0.97042200  |
| H | 4.90895200  | -0.21481800 | -1.54524800  |
| H | 6.19941700  | -0.38576700 | -2.74177100  |
| H | 6.47921300  | 0.54529900  | -1.26560500  |
| H | 2.71643600  | -1.07481100 | -5.46154700  |
| H | 6.87436900  | -3.35052500 | -5.87686900  |
| H | 6.46597900  | -2.24765600 | -7.20548200  |
| H | 2.93779900  | -6.17937500 | -8.30209800  |
| H | 4.67494200  | -6.05133300 | -8.68661300  |
| H | 4.15711500  | -6.52298900 | -7.04544100  |
| H | 3.37952300  | -4.29698100 | -10.23208200 |
| H | 3.21043300  | -2.08401900 | -11.35332100 |
| H | 3.49437200  | 0.01319600  | -10.06658400 |
| H | 3.92878800  | -0.07248600 | -7.60978800  |
| H | -1.72242500 | -4.66574400 | -6.71847400  |
| H | -1.13340500 | -2.44320100 | -7.67682700  |
| H | 0.94816400  | -1.30559800 | -6.98186100  |

|   |             |             |             |
|---|-------------|-------------|-------------|
| H | 1.86771400  | -4.56121800 | -4.34324800 |
| H | -0.20672700 | -5.72113400 | -5.04834600 |

M4

%mem=30GB

%nprocshared=22

%chk=M4.chk

# opt=(maxstep=5,notrust,gdiis,cartesian) freq b3lyp/6-31g(d)

scrf=(solvent=dichloromethane) nosymm

Title Card Required

0 1

|   |             |             |             |
|---|-------------|-------------|-------------|
| C | 2.23609500  | 1.90024100  | -3.17217800 |
| C | 2.52478000  | 3.23007100  | -3.81669400 |
| C | 4.43224200  | 2.19750800  | -4.72526100 |
| O | 3.89475900  | 3.37815200  | -4.12658300 |
| N | 3.09760000  | 0.83190800  | -3.27169600 |
| C | 2.46357700  | -0.22804200 | -2.70456100 |
| N | 1.13166700  | 1.57142700  | -2.55482700 |
| N | 1.28746400  | 0.24555200  | -2.24970800 |
| C | 0.22355800  | -0.41889400 | -1.52235200 |
| C | 0.35460700  | -0.57613200 | -0.13260900 |
| C | -0.93479200 | -0.78243000 | -2.22588500 |
| C | -0.70994900 | -1.17740300 | 0.54346000  |
| C | -1.96556000 | -1.38157500 | -1.49548500 |
| C | -1.87191700 | -1.59296700 | -0.11642400 |
| C | 1.57430700  | -0.10928100 | 0.62133000  |
| C | -1.08718200 | -0.53429000 | -3.70573400 |

|   |             |             |              |
|---|-------------|-------------|--------------|
| C | -3.01285700 | -2.21739700 | 0.65069100   |
| C | 4.51743700  | 1.03341900  | -3.72988200  |
| C | 5.49272900  | 1.23460800  | -2.50314100  |
| C | 6.79367800  | 1.90615500  | -2.99792500  |
| C | 4.89510600  | 2.11657400  | -1.38778900  |
| C | 5.86226100  | -0.14200900 | -1.91276400  |
| C | 2.88280100  | -1.68731700 | -2.61080500  |
| C | 3.56547700  | -2.32788900 | -3.76360400  |
| C | 2.88993600  | -2.22727100 | -5.15195700  |
| O | 2.62450500  | -2.25751200 | -1.55613300  |
| C | 3.49752700  | -2.12485500 | -7.64659700  |
| C | 3.62663300  | -3.30367900 | -8.39603000  |
| C | 4.49243800  | -3.84849600 | -6.33548300  |
| C | 4.04724400  | -2.34411600 | -6.23416200  |
| N | 4.19783800  | -4.31406300 | -7.60192900  |
| O | 5.03544700  | -4.51759000 | -5.46203600  |
| N | 5.08223000  | -1.43529100 | -5.84389400  |
| C | 6.28891200  | -1.61213000 | -6.59531800  |
| C | 7.36361300  | -0.66062700 | -6.12308100  |
| F | 8.49613300  | -0.78695400 | -6.86081700  |
| F | 6.99131400  | 0.64501600  | -6.21280300  |
| F | 7.72480700  | -0.86699800 | -4.82944000  |
| C | 4.50627200  | -5.65311200 | -8.06214100  |
| C | 3.24627600  | -3.37721800 | -9.73287200  |
| C | 2.72994400  | -2.21634300 | -10.32727700 |
| C | 2.61679600  | -1.02719600 | -9.60350100  |
| C | 3.01185900  | -0.97879800 | -8.25673500  |
| C | -0.47955600 | -4.88448100 | -5.87328600  |
| C | -0.46776700 | -3.58710200 | -6.38778300  |
| C | 0.61718900  | -2.74466100 | -6.13694000  |

|   |             |             |             |
|---|-------------|-------------|-------------|
| C | 1.71449700  | -3.17148500 | -5.37116300 |
| C | 1.68806000  | -4.48143500 | -4.86578800 |
| C | 0.60461400  | -5.32705400 | -5.11281100 |
| H | 3.75946300  | -3.36124500 | -3.47492400 |
| H | 4.56016000  | -1.86155100 | -3.97167700 |
| H | 1.90718600  | 3.30257400  | -4.72616900 |
| H | 2.23921200  | 4.04268500  | -3.14511300 |
| H | 3.82052700  | 1.89277100  | -5.58672500 |
| H | 5.42492400  | 2.44839600  | -5.09126300 |
| H | -0.62786500 | -1.31879100 | 1.61826500  |
| H | -2.86685200 | -1.68463500 | -2.02231200 |
| H | 2.45530100  | -0.69141800 | 0.33313900  |
| H | 1.78738400  | 0.94853600  | 0.42691100  |
| H | 1.42509200  | -0.22626100 | 1.69783500  |
| H | -0.97387000 | 0.52866300  | -3.94579800 |
| H | -0.34391800 | -1.08742400 | -4.28934200 |
| H | -2.07561100 | -0.85454100 | -4.04499300 |
| H | -3.67655500 | -1.44535500 | 1.06158700  |
| H | -3.61998500 | -2.86302400 | 0.00870400  |
| H | -2.64799900 | -2.81372200 | 1.49312200  |
| H | 4.80650600  | 0.15132300  | -4.32094100 |
| H | 7.23874900  | 1.36965700  | -3.83852400 |
| H | 6.62625600  | 2.94725700  | -3.29196600 |
| H | 7.52273800  | 1.91005600  | -2.18038300 |
| H | 4.62041800  | 3.10795700  | -1.75784900 |
| H | 4.01718900  | 1.65986300  | -0.91763900 |
| H | 5.64297900  | 2.24918500  | -0.59821700 |
| H | 4.99816800  | -0.66401400 | -1.48813800 |
| H | 6.32349200  | -0.78481400 | -2.66877400 |
| H | 6.58093100  | -0.01034600 | -1.09608900 |

|   |             |             |              |
|---|-------------|-------------|--------------|
| H | 2.52406900  | -1.20089200 | -5.28406600  |
| H | 6.75425600  | -2.61922200 | -6.52799900  |
| H | 6.19362900  | -1.40966500 | -7.68542200  |
| H | 3.59397100  | -6.18457500 | -8.35573200  |
| H | 5.18982900  | -5.62441700 | -8.91864900  |
| H | 4.98346900  | -6.18161600 | -7.23561400  |
| H | 3.34716000  | -4.29588200 | -10.30285700 |
| H | 2.42473300  | -2.24583000 | -11.36990900 |
| H | 2.22745900  | -0.13482500 | -10.08616600 |
| H | 2.94748900  | -0.04926400 | -7.69560600  |
| H | -1.32321700 | -5.54295300 | -6.06198500  |
| H | -1.30241000 | -3.22697700 | -6.98372000  |
| H | 0.61895100  | -1.74030800 | -6.55211100  |
| H | 2.52351400  | -4.85727400 | -4.28493500  |
| H | 0.61042900  | -6.33561300 | -4.70755600  |

M5

%mem=32GB

%nprocshared=22

%chk=M5.chk

# opt=(maxstep=10,notrust,gdiis,cartesian) freq b3lyp/6-31g(d)

scrf=(solvent=dichloromethane) nosymm

Generated by Multiwfn

0 1

|   |             |             |             |
|---|-------------|-------------|-------------|
| C | -1.36822000 | -3.09493600 | -5.38102300 |
| C | -2.46464900 | -3.30411300 | -4.36807600 |
| C | -1.69723300 | -5.56498300 | -4.28624000 |
| O | -2.80326000 | -4.66853300 | -4.19157100 |

|   |             |             |             |
|---|-------------|-------------|-------------|
| N | -0.58838300 | -4.13278600 | -5.84084800 |
| C | 0.50541900  | -3.58723500 | -6.45401100 |
| N | -0.89247700 | -1.94214800 | -5.76150500 |
| N | 0.26165600  | -2.26269200 | -6.44085600 |
| C | 0.95001300  | -1.18208400 | -7.11594500 |
| C | 0.66305900  | -0.97357800 | -8.47302600 |
| C | 1.75961100  | -0.30683200 | -6.37395000 |
| C | 1.26592300  | 0.12224800  | -9.10368400 |
| C | 2.32873600  | 0.77268600  | -7.05190800 |
| C | 2.10710900  | 0.99960100  | -8.41620500 |
| C | -0.28409900 | -1.86191100 | -9.24695600 |
| C | 2.03271200  | -0.53138900 | -4.91141100 |
| C | 2.76793800  | 2.16014200  | -9.12199600 |
| C | -1.06610900 | -5.53700500 | -5.68980200 |
| C | -2.00853200 | -6.01560500 | -6.86050100 |
| C | -2.37609800 | -7.48880000 | -6.57095300 |
| C | -3.30106700 | -5.19157500 | -7.03015500 |
| C | -1.23832700 | -5.97671000 | -8.19216600 |
| C | 2.00563500  | -4.14649900 | -6.76949300 |
| C | 2.11969300  | -4.64349800 | -8.23995500 |
| C | 3.33028800  | -5.57244200 | -8.15415700 |
| C | 4.44253300  | -6.67387200 | -6.15514800 |
| C | 4.60967300  | -8.06558600 | -6.13068700 |
| C | 2.50051400  | -7.76959400 | -6.99183100 |
| C | 3.10121200  | -6.34435200 | -6.79033700 |
| N | 3.45485500  | -8.69457400 | -6.63230900 |
| O | 1.37068100  | -8.04762300 | -7.37727500 |
| N | 2.14854200  | -5.50152700 | -6.04724900 |
| C | 2.16266800  | -5.64297800 | -4.60126300 |
| C | 2.55507500  | -4.49027900 | -3.67735100 |

|   |             |              |              |
|---|-------------|--------------|--------------|
| F | 1.66415500  | -3.46710200  | -3.71179500  |
| F | 2.51016100  | -4.97198700  | -2.40003400  |
| F | 3.78405500  | -3.98351900  | -3.84781900  |
| C | 3.25390300  | -10.12965200 | -6.69398400  |
| C | 5.77593300  | -8.65942700  | -5.65891500  |
| C | 6.79275100  | -7.81116700  | -5.19756000  |
| C | 6.64075900  | -6.42242400  | -5.21511300  |
| C | 5.45908100  | -5.84425900  | -5.70337600  |
| C | 4.39057300  | -7.95793000  | -11.62023900 |
| C | 3.04695400  | -7.80592000  | -11.26990900 |
| C | 2.68932100  | -7.04503800  | -10.15534300 |
| C | 3.66732600  | -6.41836700  | -9.36692800  |
| C | 5.01272800  | -6.57712200  | -9.73472300  |
| C | 5.37473600  | -7.33976500  | -10.84663800 |
| O | 2.84557900  | -3.22883100  | -6.41974700  |
| H | -2.11454400 | -2.87005900  | -3.41866400  |
| H | -3.37502900 | -2.77737400  | -4.66474200  |
| H | -0.93559600 | -5.31201200  | -3.53401800  |
| H | -2.09159600 | -6.55358200  | -4.05421500  |
| H | 1.05626200  | 0.29711800   | -10.15632600 |
| H | 2.96590200  | 1.45654200   | -6.49548500  |
| H | 0.14196400  | -2.85394700  | -9.43480400  |
| H | -1.23035500 | -2.00726300  | -8.71323000  |
| H | -0.51382500 | -1.41567400  | -10.21840600 |
| H | 1.10501000  | -0.56559600  | -4.32852400  |
| H | 2.53760200  | -1.49226200  | -4.78709100  |
| H | 2.65941100  | 0.26972300   | -4.50865800  |
| H | 2.25347500  | 2.40695700   | -10.05599800 |
| H | 2.78265000  | 3.05581500   | -8.49135400  |
| H | 3.81080000  | 1.92546400   | -9.37258400  |

|   |             |              |              |
|---|-------------|--------------|--------------|
| H | -0.17693400 | -6.16834000  | -5.72194100  |
| H | -1.47942900 | -8.10054400  | -6.41842400  |
| H | -3.02621900 | -7.59453500  | -5.69641800  |
| H | -2.91752200 | -7.90230800  | -7.42875900  |
| H | -3.95686000 | -5.25715100  | -6.16073000  |
| H | -3.08813500 | -4.13310200  | -7.22328300  |
| H | -3.84685800 | -5.56956800  | -7.90242800  |
| H | -0.98710400 | -4.95100400  | -8.48256200  |
| H | -0.32237400 | -6.57041600  | -8.13390100  |
| H | -1.86789900 | -6.39040000  | -8.98838700  |
| H | 4.18975200  | -4.92664300  | -7.95679200  |
| H | 1.17691500  | -5.93760400  | -4.21522700  |
| H | 2.83884700  | -6.45668600  | -4.32695400  |
| H | 3.99124800  | -10.59542500 | -7.35650400  |
| H | 3.33884100  | -10.57662900 | -5.69713100  |
| H | 2.25158500  | -10.30483900 | -7.08623100  |
| H | 1.22875500  | -5.17094300  | -8.58074300  |
| H | 5.90080200  | -9.73752400  | -5.64636900  |
| H | 7.71358500  | -8.24779100  | -4.82058700  |
| H | 7.44168200  | -5.78621200  | -4.84975200  |
| H | 5.32191400  | -4.76757900  | -5.71772400  |
| H | 4.66670300  | -8.54820700  | -12.48999300 |
| H | 2.27190000  | -8.27938700  | -11.86725500 |
| H | 1.64073800  | -6.94395300  | -9.89677500  |
| H | 5.78452200  | -6.09170000  | -9.14222000  |
| H | 6.42397500  | -7.44454700  | -11.11045200 |
| H | 2.31233600  | -3.79123800  | -8.89639100  |

TS6

%mem=128GB



%nprocshared=32

%chk=TS6.chk

# opt=(calcf,ts,noeigen,maxstep=5,notrust,gdiis,cartesian) freq

b3lyp/6-31g(d) scrf=(solvent=dichloromethane) nosymm

Generated by Multiwfn

0 1

|   |             |             |             |
|---|-------------|-------------|-------------|
| C | -1.36157100 | -3.11400700 | -5.29599500 |
| C | -2.41188600 | -3.38525300 | -4.25181000 |
| C | -1.66376300 | -5.64877300 | -4.33112500 |
| O | -2.76661800 | -4.75571900 | -4.17905800 |
| N | -0.58656900 | -4.12319500 | -5.82604200 |
| C | 0.45850100  | -3.55477600 | -6.50417400 |
| N | -0.92731500 | -1.94303900 | -5.66728400 |
| N | 0.19267100  | -2.23526600 | -6.42745200 |
| C | 0.83481600  | -1.13608400 | -7.11006600 |
| C | 0.60127200  | -0.97786600 | -8.48488800 |
| C | 1.57740400  | -0.20321300 | -6.36605100 |
| C | 1.18104900  | 0.12630000  | -9.12270900 |
| C | 2.12637700  | 0.88235500  | -7.05119400 |
| C | 1.95217200  | 1.06105600  | -8.42907300 |
| C | -0.26643300 | -1.92836400 | -9.27726700 |
| C | 1.79904700  | -0.36747200 | -4.88560600 |
| C | 2.58902600  | 2.23038200  | -9.14239400 |
| C | -1.02761100 | -5.53881600 | -5.72854700 |
| C | -1.95091100 | -5.99285900 | -6.92372900 |
| C | -2.26398400 | -7.49237300 | -6.71796000 |
| C | -3.27261500 | -5.20686200 | -7.04087700 |
| C | -1.18624500 | -5.85109500 | -8.25290000 |

|   |             |              |              |
|---|-------------|--------------|--------------|
| C | 2.21109500  | -4.08449400  | -6.76839200  |
| C | 2.32944700  | -4.56320000  | -8.23132300  |
| C | 3.48098400  | -5.56920200  | -8.13956500  |
| C | 4.51811600  | -6.75480700  | -6.14047800  |
| C | 4.56653900  | -8.15557300  | -6.10182300  |
| C | 2.48743700  | -7.69350700  | -6.95897900  |
| C | 3.20395000  | -6.31933800  | -6.77123400  |
| N | 3.36072700  | -8.69036500  | -6.59229100  |
| O | 1.33666200  | -7.87831400  | -7.33819000  |
| N | 2.33866200  | -5.38947300  | -6.03062100  |
| C | 2.28202500  | -5.51516600  | -4.59119800  |
| C | 2.86969700  | -4.44260200  | -3.67037000  |
| F | 2.09716900  | -3.33326400  | -3.60683500  |
| F | 2.87786200  | -4.95670700  | -2.40531600  |
| F | 4.12786700  | -4.06376500  | -3.93986100  |
| C | 3.04164600  | -10.10475800 | -6.64150800  |
| C | 5.68075200  | -8.84341800  | -5.63269700  |
| C | 6.77254000  | -8.08257600  | -5.19155500  |
| C | 6.74291100  | -6.68652400  | -5.22862600  |
| C | 5.61101100  | -6.01393700  | -5.71328100  |
| C | 4.37402200  | -8.05043000  | -11.58496800 |
| C | 3.04431100  | -7.79932200  | -11.23897700 |
| C | 2.74044400  | -7.00549000  | -10.13149100 |
| C | 3.75998100  | -6.44471800  | -9.34641800  |
| C | 5.09117900  | -6.70257700  | -9.70938800  |
| C | 5.39890400  | -7.49830300  | -10.81435200 |
| O | 2.90535700  | -3.10644900  | -6.37211500  |
| H | -2.01433200 | -3.04068600  | -3.28395900  |
| H | -3.32500800 | -2.82294200  | -4.46149700  |
| H | -0.90393200 | -5.44673800  | -3.56101000  |

|   |             |              |              |
|---|-------------|--------------|--------------|
| H | -2.06163100 | -6.64856200  | -4.16035800  |
| H | 1.00876300  | 0.26155300   | -10.18797800 |
| H | 2.70976500  | 1.60895400   | -6.48992900  |
| H | 0.23683500  | -2.88315800  | -9.46603600  |
| H | -1.20487900 | -2.15039500  | -8.75727000  |
| H | -0.51670600 | -1.49203600  | -10.24837600 |
| H | 0.85160700  | -0.36667100  | -4.33481300  |
| H | 2.29521700  | -1.32078000  | -4.69113700  |
| H | 2.41954300  | 0.44574900   | -4.49768100  |
| H | 2.10492400  | 2.42474700   | -10.10460600 |
| H | 2.53468400  | 3.14404000   | -8.54034700  |
| H | 3.65160100  | 2.03843900   | -9.34126100  |
| H | -0.12428000 | -6.15086600  | -5.77539500  |
| H | -1.34436200 | -8.07687200  | -6.60200300  |
| H | -2.90690500 | -7.67109000  | -5.84970900  |
| H | -2.79406800 | -7.87667000  | -7.59646600  |
| H | -3.91828400 | -5.34297100  | -6.17165200  |
| H | -3.09833900 | -4.13202700  | -7.17246500  |
| H | -3.81298700 | -5.55416900  | -7.92930600  |
| H | -0.95819600 | -4.80496100  | -8.48009800  |
| H | -0.25611900 | -6.42374800  | -8.23018200  |
| H | -1.80723000 | -6.23261900  | -9.07186900  |
| H | 4.38666700  | -4.98554100  | -7.94779900  |
| H | 1.24842700  | -5.60979400  | -4.23350600  |
| H | 2.78570300  | -6.44104000  | -4.30350200  |
| H | 3.73804600  | -10.63465400 | -7.30001900  |
| H | 3.09049300  | -10.54806900 | -5.64075900  |
| H | 2.02811500  | -10.20048500 | -7.03219200  |
| H | 1.40995300  | -5.03450200  | -8.57904000  |
| H | 5.71067000  | -9.92803300  | -5.60870200  |

|   |            |             |              |
|---|------------|-------------|--------------|
| H | 7.65541500 | -8.59334500 | -4.81720200  |
| H | 7.60057000 | -6.11755700 | -4.88196900  |
| H | 5.57719500 | -4.92985300 | -5.74144400  |
| H | 4.60838700 | -8.66615000 | -12.44926200 |
| H | 2.23811300 | -8.22058400 | -11.83406400 |
| H | 1.70124200 | -6.82656500 | -9.87754700  |
| H | 5.89525000 | -6.26991100 | -9.11900700  |
| H | 6.43825700 | -7.68047200 | -11.07496100 |
| H | 2.57553400 | -3.71924000 | -8.88031800  |

M6

%mem=128GB

%nprocshared=32

%chk=M6.chk

# opt=(maxstep=5,notrust,gdiis,cartesian) freq b3lyp/6-31g(d)

scrf=(solvent=dichloromethane) nosymm

Generated by Multiwfn

0 1

|   |            |             |             |
|---|------------|-------------|-------------|
| C | 1.86000300 | -4.40151800 | -6.76936600 |
| C | 2.24760600 | -4.64706300 | -8.21763700 |
| C | 3.51495500 | -5.51339100 | -8.13129900 |
| C | 4.64781400 | -6.77450900 | -6.18052100 |
| C | 4.57214900 | -8.17523000 | -6.12591300 |
| C | 2.49395900 | -7.54536600 | -6.86141900 |
| C | 3.35001000 | -6.24803500 | -6.74346500 |
| N | 3.29538200 | -8.60970300 | -6.53617000 |
| O | 1.31193500 | -7.59175500 | -7.17373300 |
| N | 2.62486000 | -5.23325600 | -5.96955400 |

|   |            |              |              |
|---|------------|--------------|--------------|
| C | 2.27141100 | -5.39979300  | -4.57293700  |
| C | 3.01777800 | -4.44910900  | -3.64658400  |
| F | 2.84785000 | -3.15957500  | -3.99519800  |
| F | 2.56161800 | -4.59883900  | -2.38244800  |
| F | 4.34799700 | -4.68345500  | -3.62382100  |
| C | 2.85073600 | -9.99195600  | -6.55103800  |
| C | 5.64609800 | -8.95330500  | -5.70949200  |
| C | 6.82231300 | -8.28696700  | -5.33869900  |
| C | 6.91334200 | -6.89418400  | -5.38812600  |
| C | 5.82043300 | -6.12777700  | -5.81823200  |
| C | 4.55809900 | -7.98989600  | -11.53391000 |
| C | 3.22925200 | -7.92286100  | -11.10928400 |
| C | 2.87673400 | -7.13117100  | -10.01497400 |
| C | 3.84844400 | -6.39163100  | -9.32257400  |
| C | 5.17893000 | -6.46771300  | -9.76061800  |
| C | 5.53403100 | -7.25897900  | -10.85435100 |
| O | 1.01085300 | -3.63208300  | -6.34738700  |
| H | 4.36256200 | -4.83734300  | -7.97354800  |
| H | 1.20415800 | -5.19861500  | -4.44493000  |
| H | 2.48180000 | -6.41957700  | -4.24313200  |
| H | 3.45586100 | -10.58241000 | -7.24653000  |
| H | 2.92286100 | -10.43098400 | -5.55037100  |
| H | 1.81011800 | -9.99992300  | -6.87683100  |
| H | 1.41380200 | -5.16386600  | -8.70245800  |
| H | 5.58301400 | -10.03576600 | -5.67088200  |
| H | 7.67645400 | -8.87035900  | -5.00686700  |
| H | 7.83413500 | -6.40082100  | -5.09236500  |
| H | 5.88664500 | -5.04445700  | -5.84841200  |
| H | 4.82914900 | -8.60342100  | -12.38877700 |
| H | 2.46098700 | -8.48614000  | -11.63220700 |

|   |            |             |              |
|---|------------|-------------|--------------|
| H | 1.84020700 | -7.10192600 | -9.69539700  |
| H | 5.94448100 | -5.89740500 | -9.24027700  |
| H | 6.57109900 | -7.29898100 | -11.17638700 |
| H | 2.40741000 | -3.70296100 | -8.74502500  |

## 12 NMR Spectra .

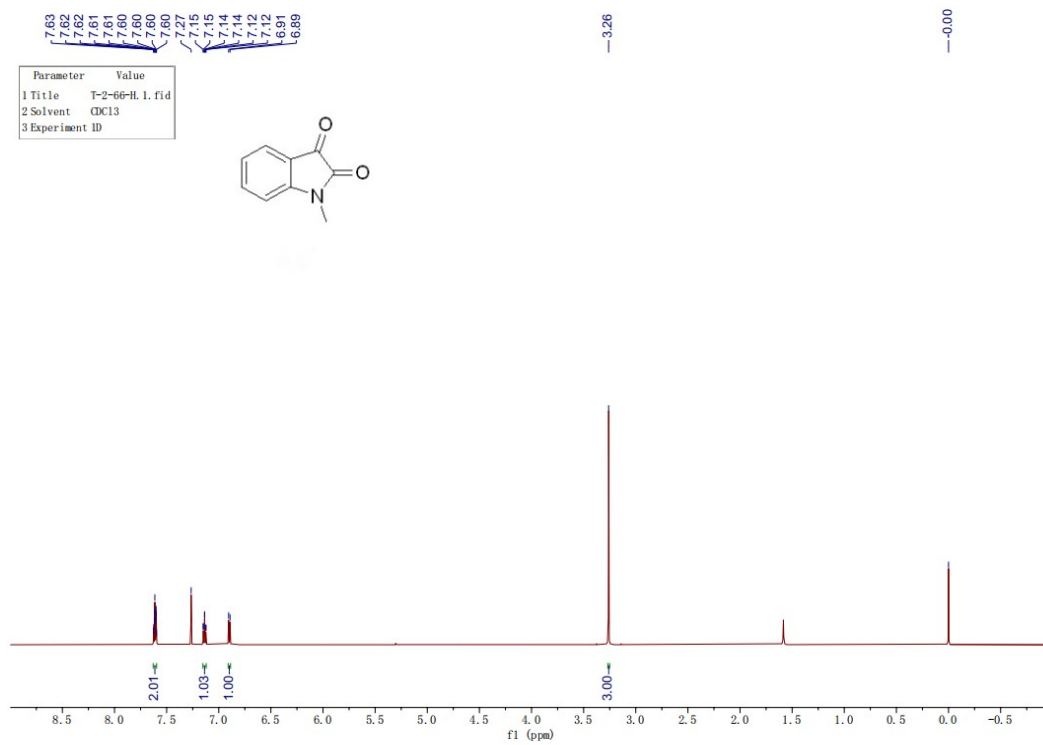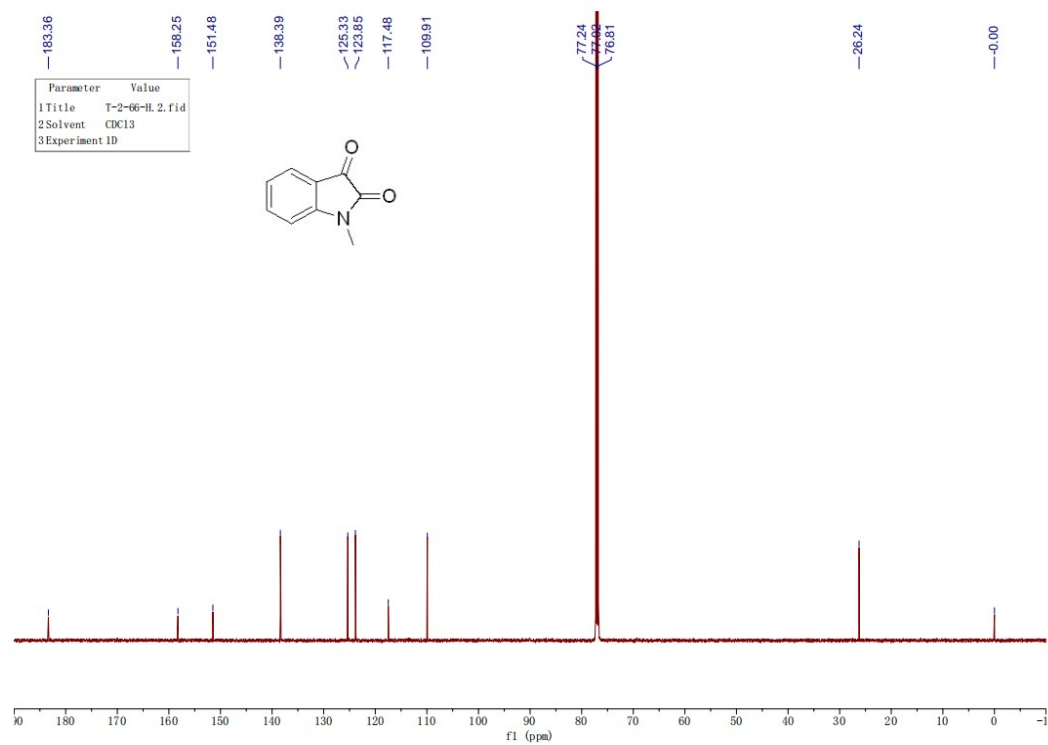

<sup>1</sup>H-NMR and <sup>13</sup>C-NMR of **1a'**

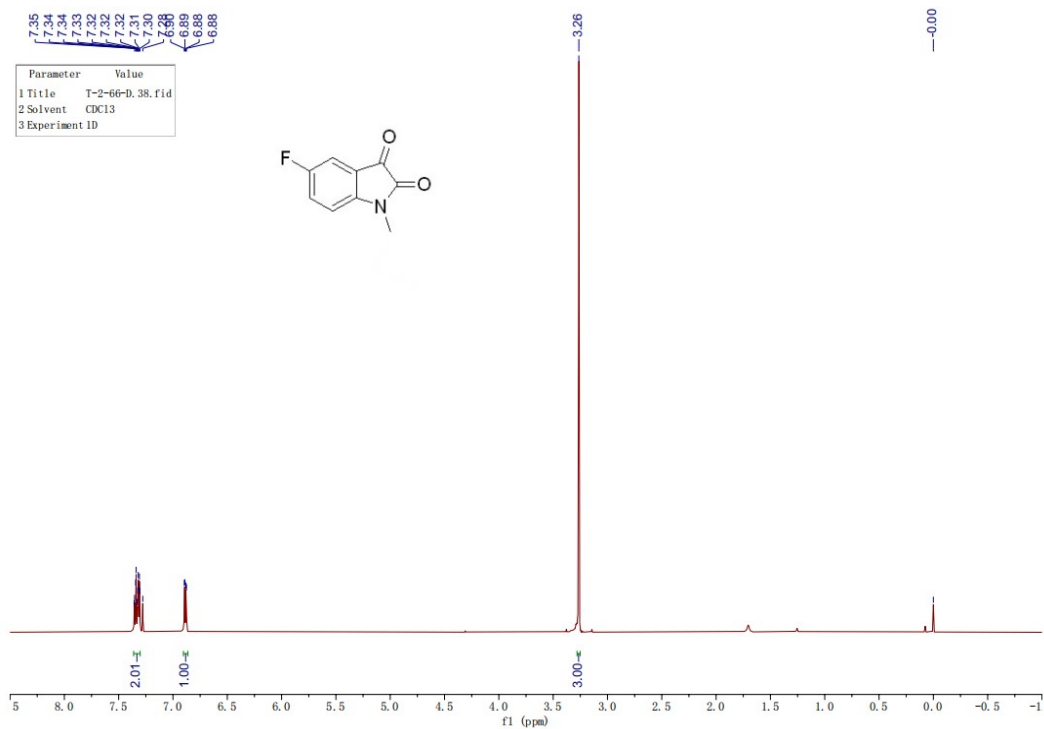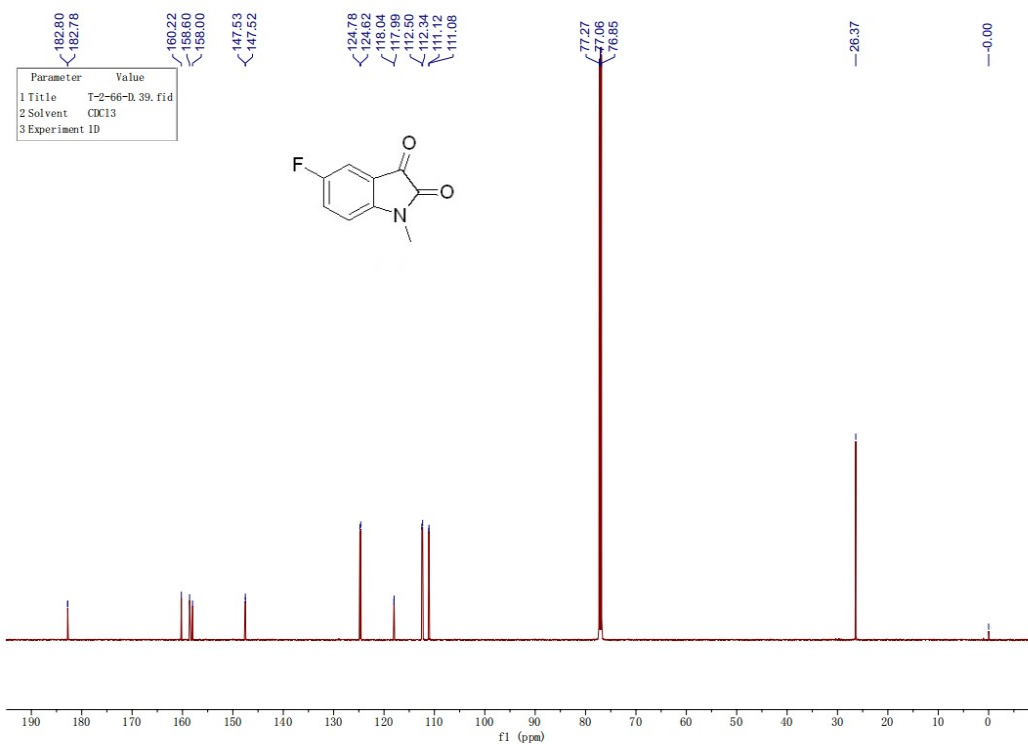

$^1\text{H-NMR}$  and  $^{13}\text{C-NMR}$  of **1b'**



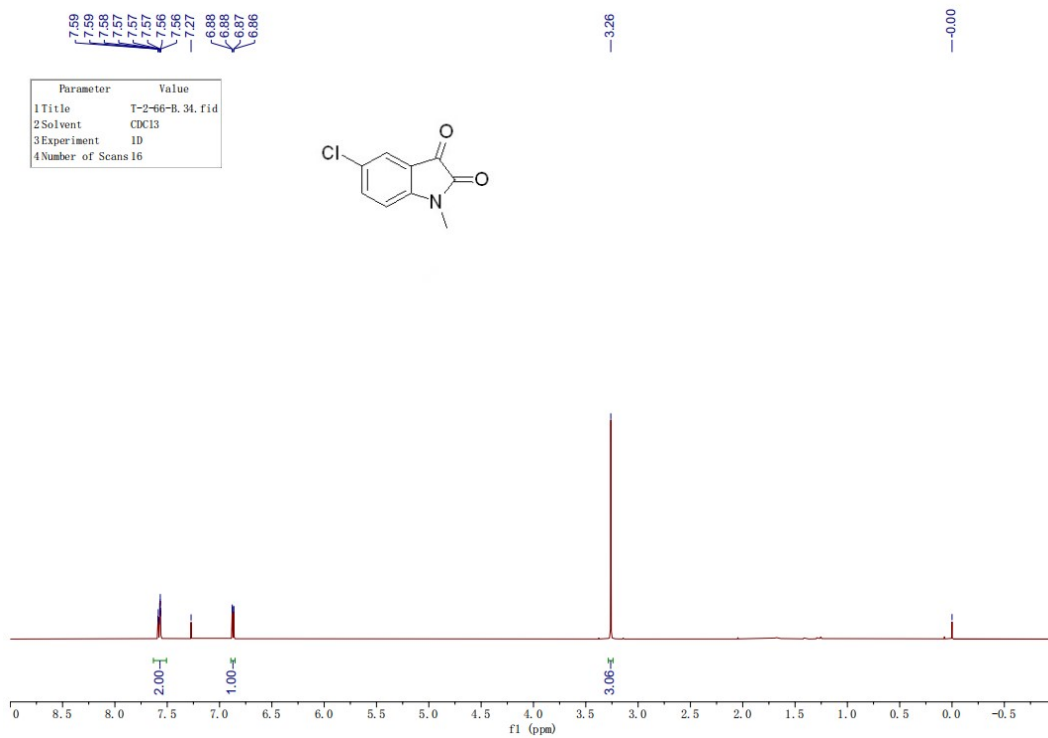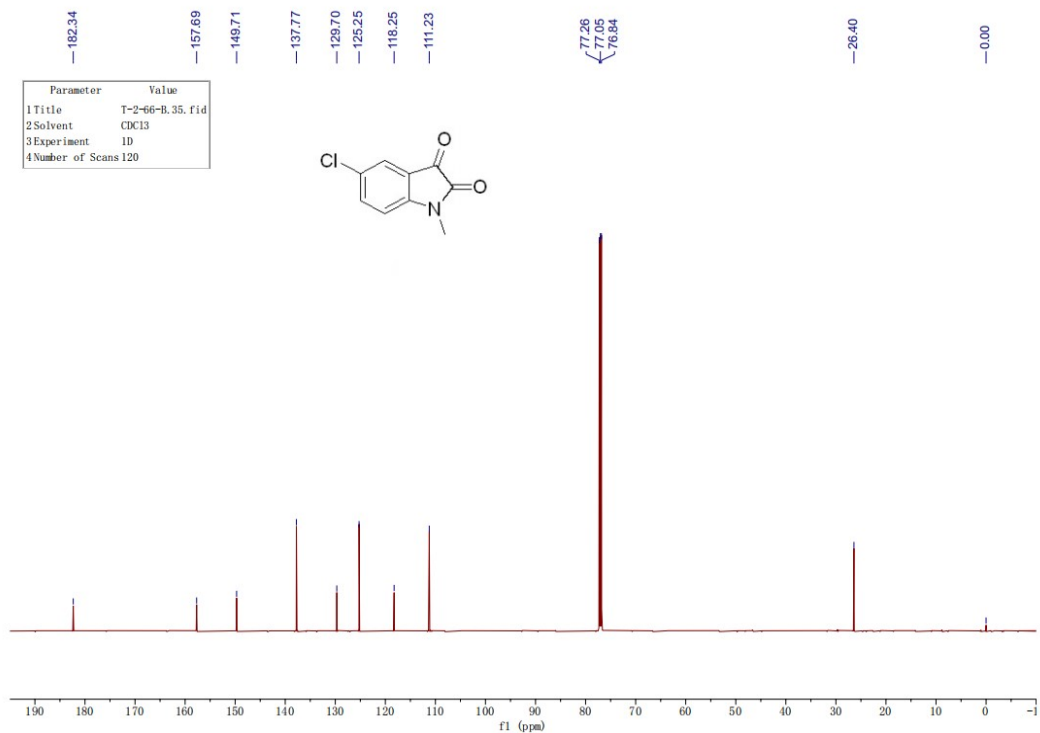

$^1\text{H-NMR}$  and  $^{13}\text{C-NMR}$  of **1c'**

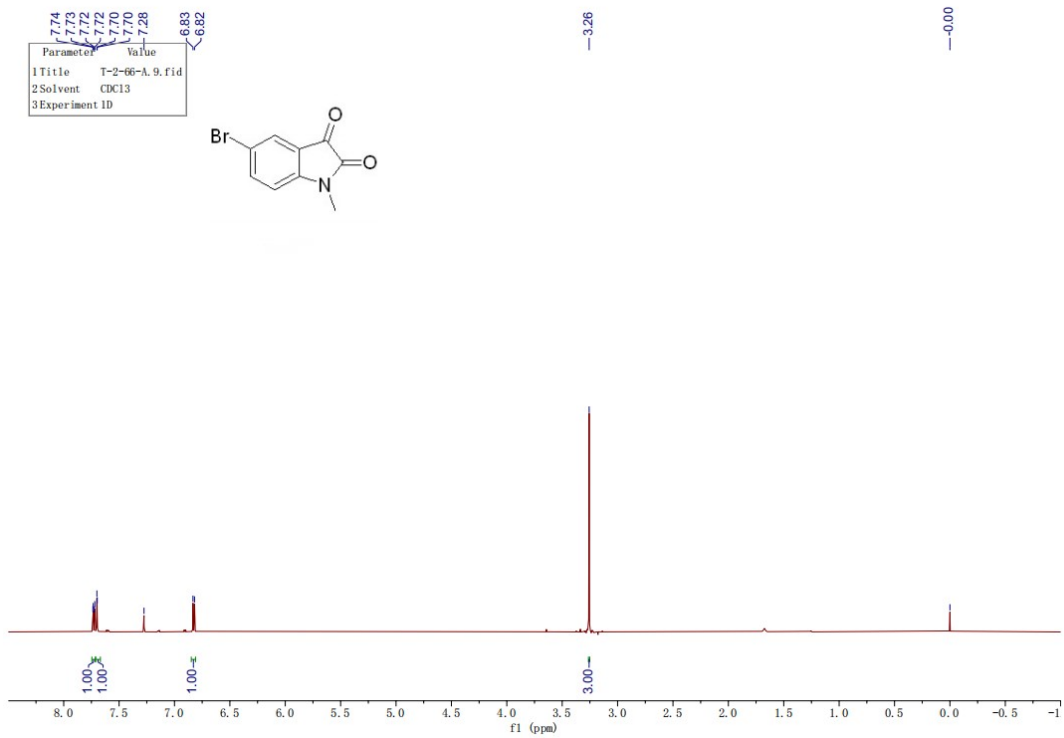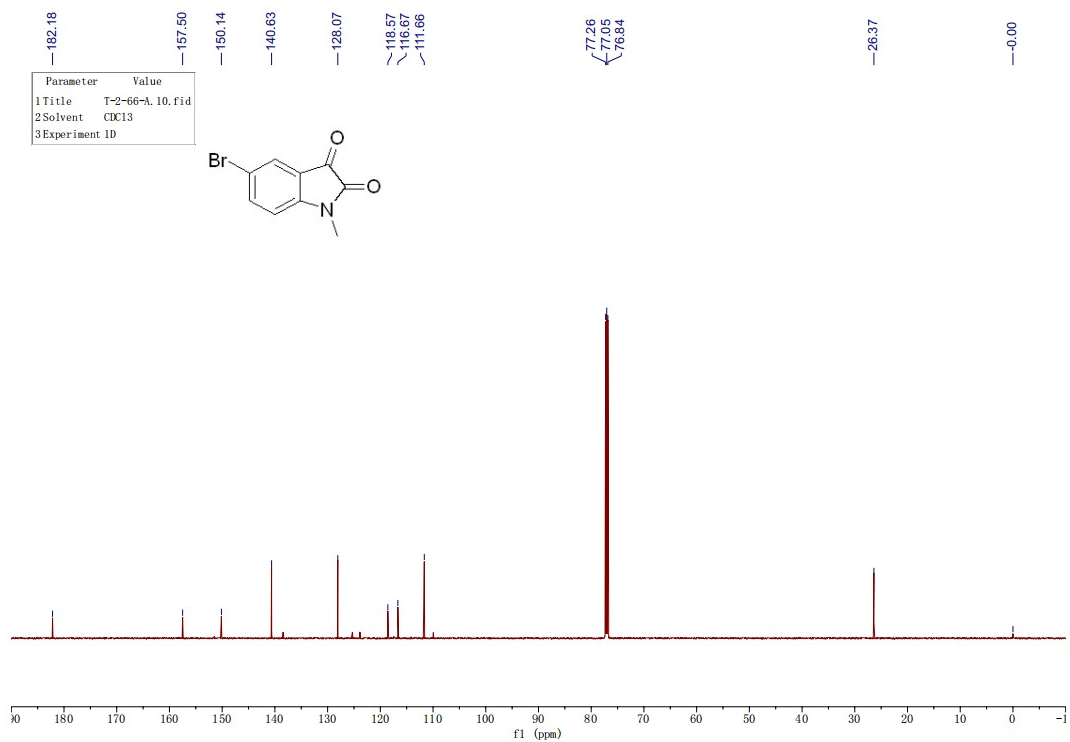

$^1\text{H-NMR}$  and  $^{13}\text{C-NMR}$  of **1d'**

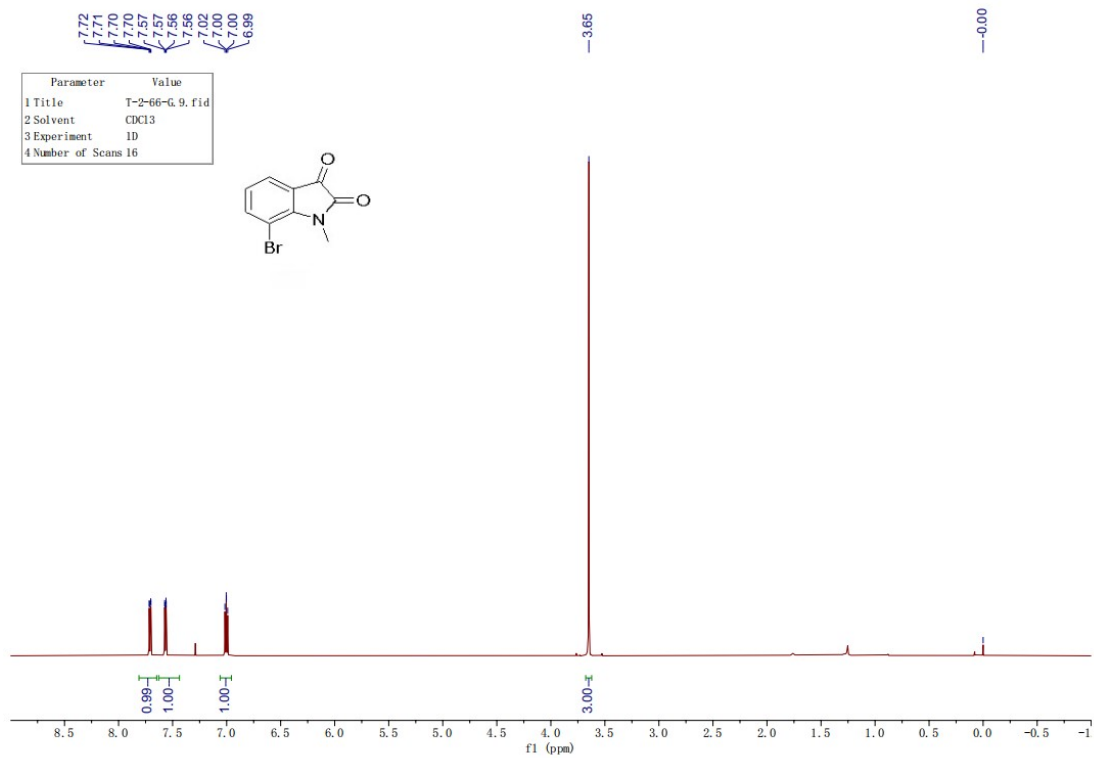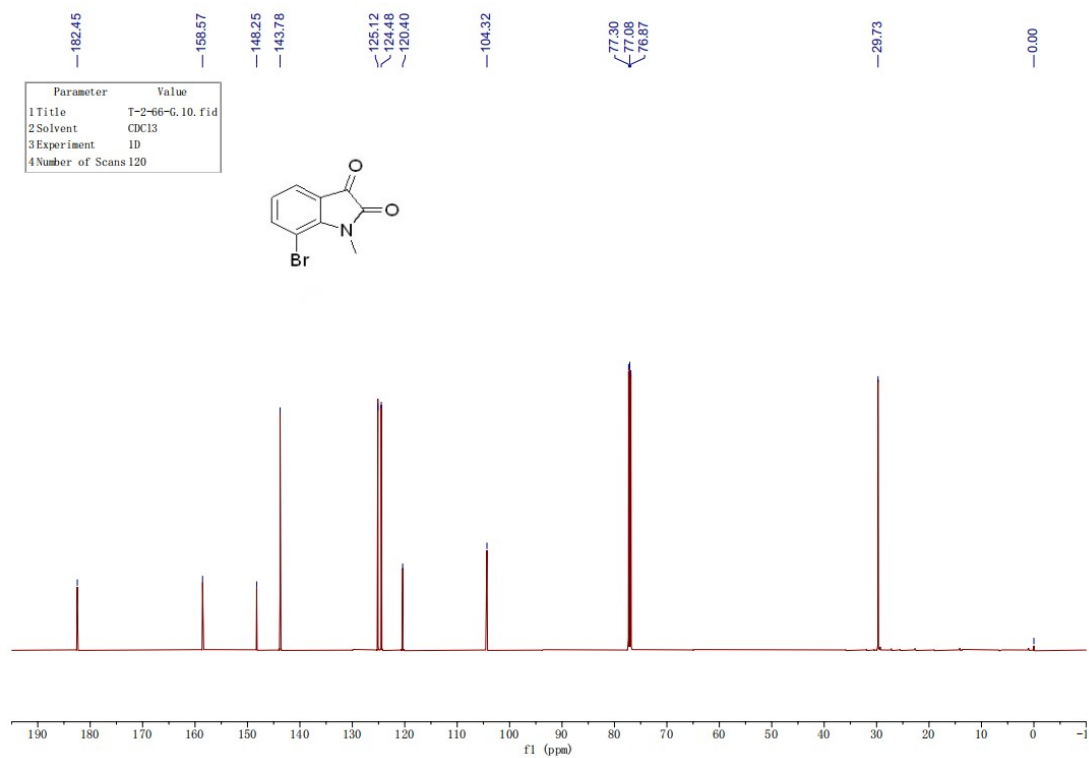

$^1\text{H-NMR}$  and  $^{13}\text{C-NMR}$  of **1e'**

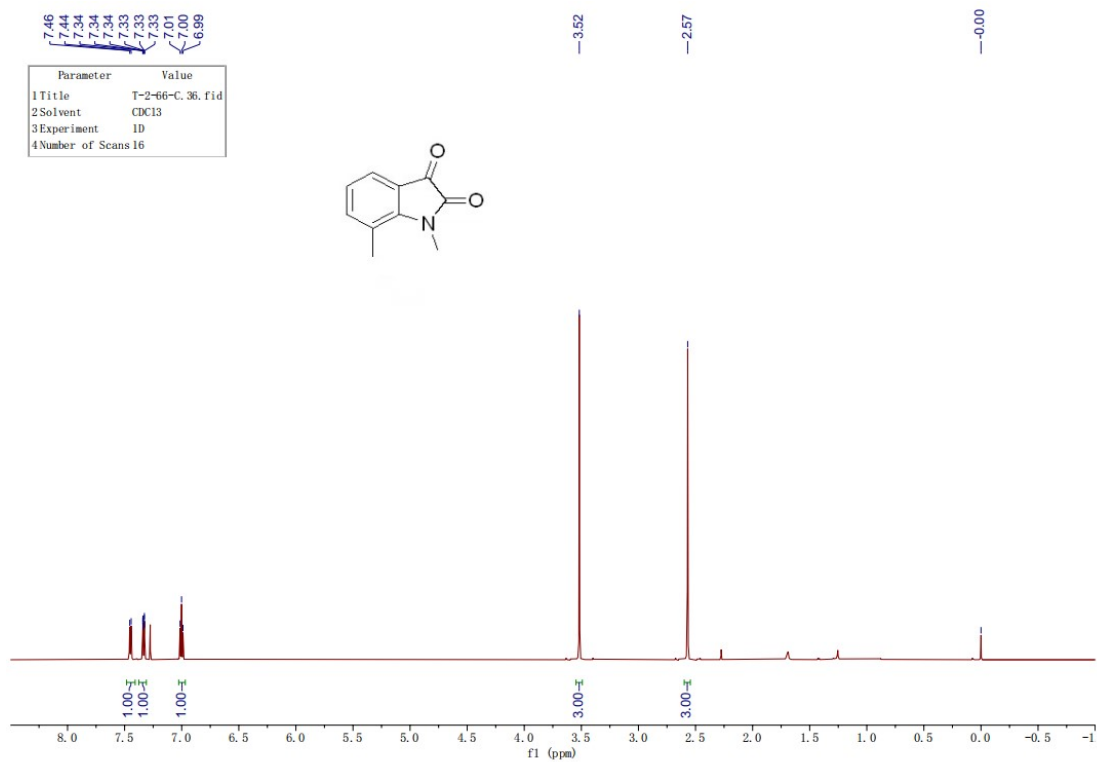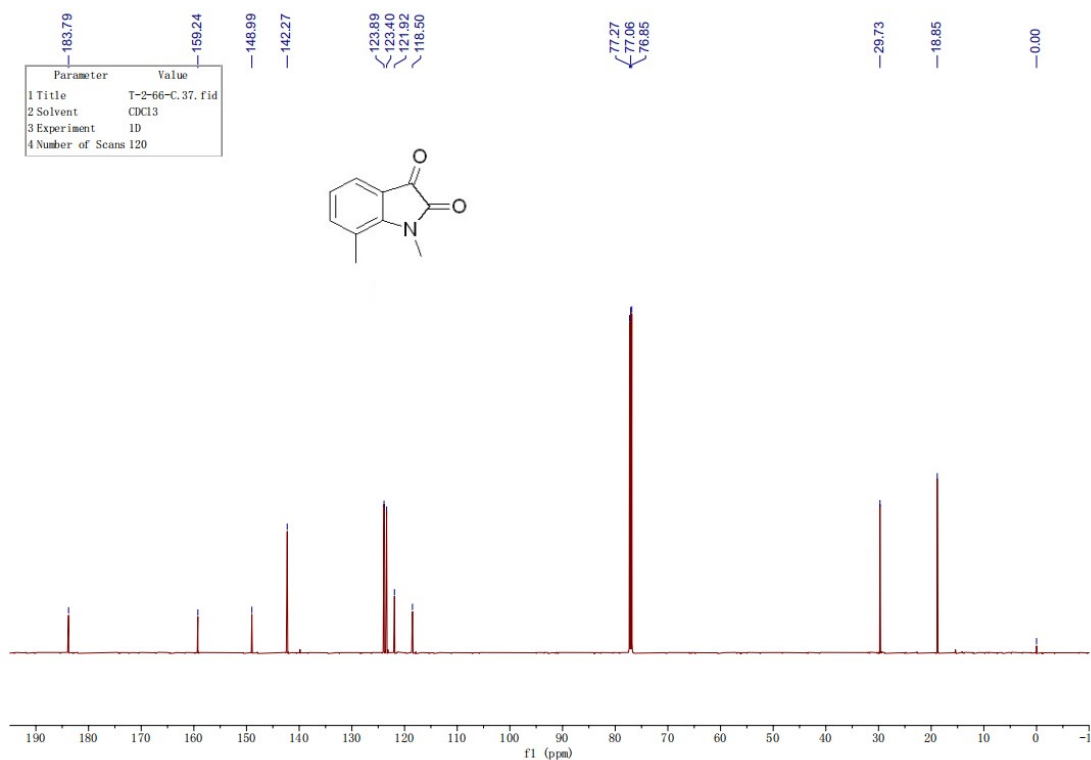

$^1\text{H-NMR}$  and  $^{13}\text{C-NMR}$  of **1f**

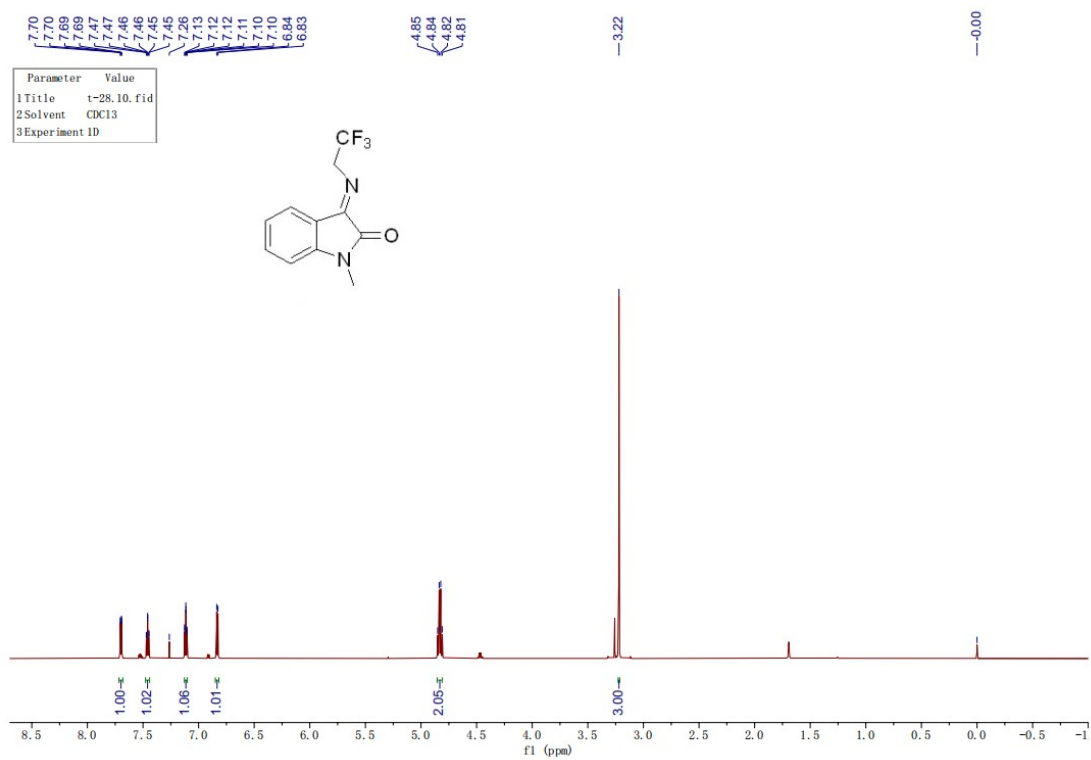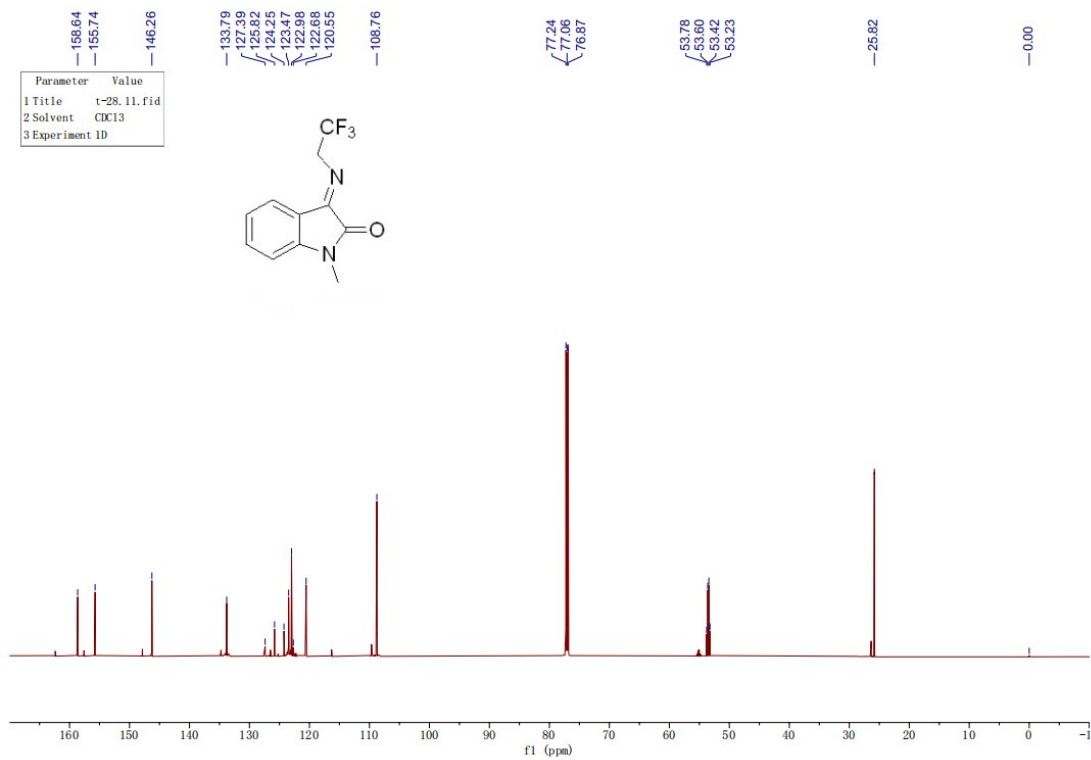

$^1\text{H-NMR}$  and  $^{13}\text{C-NMR}$  of **1a**

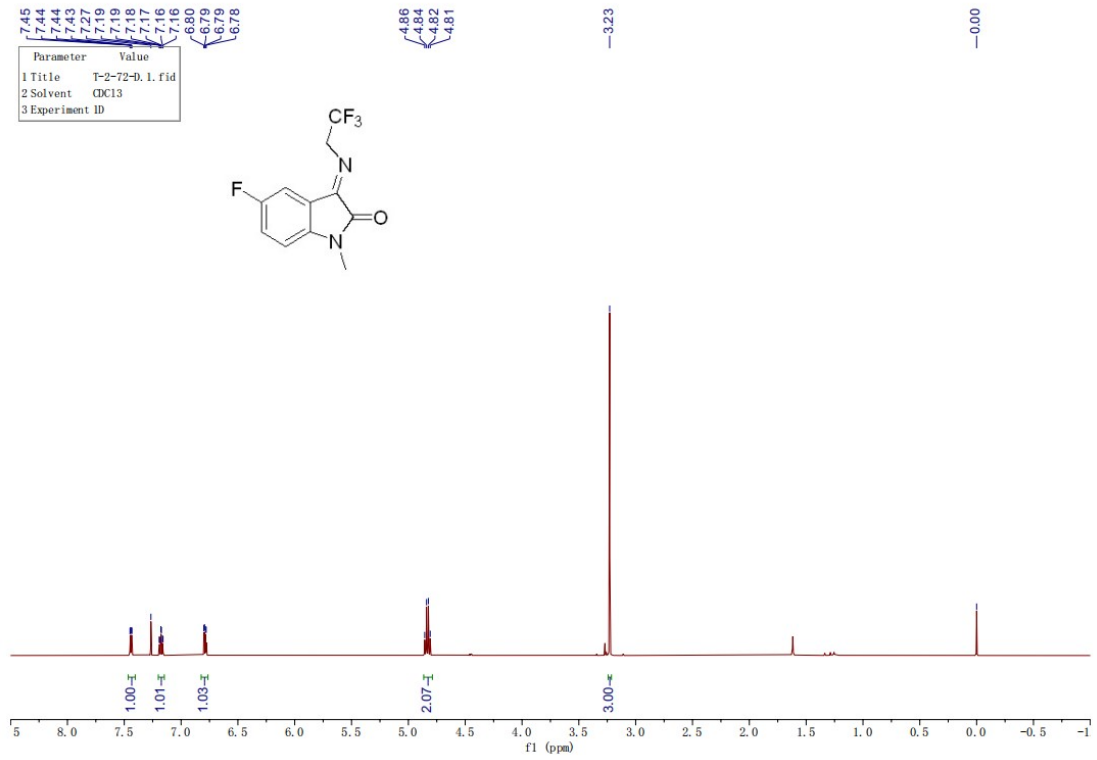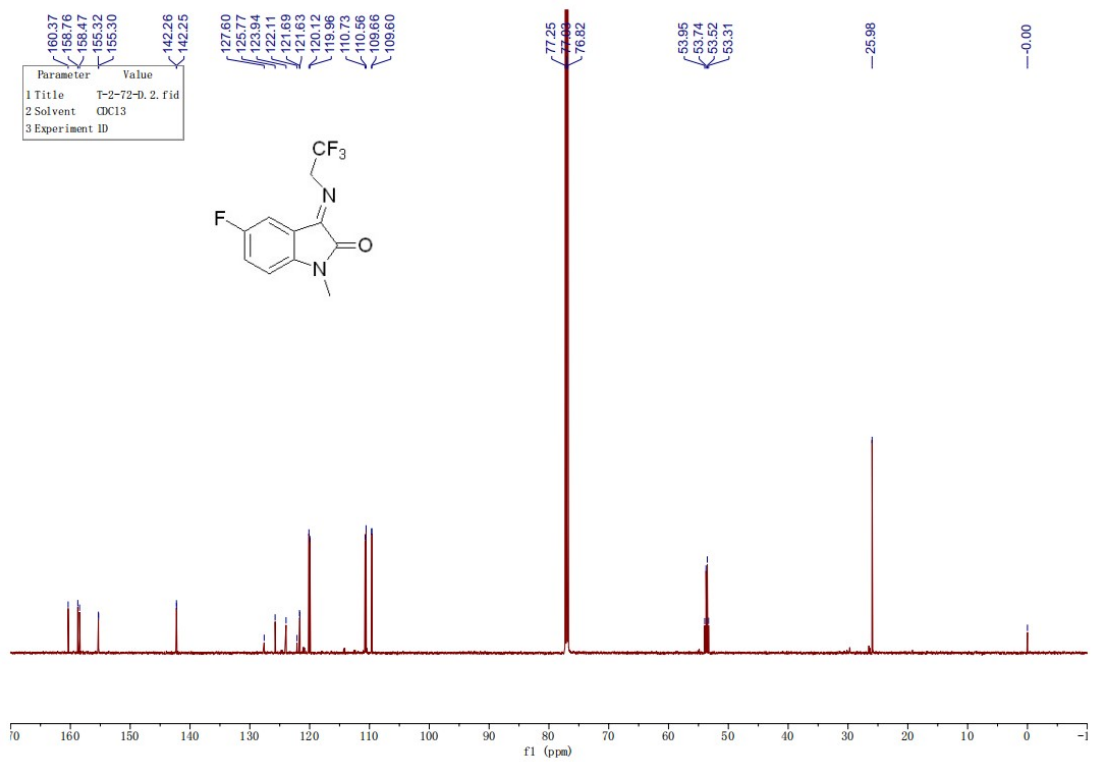

$^1\text{H-NMR}$  and  $^{13}\text{C-NMR}$  of **1b**

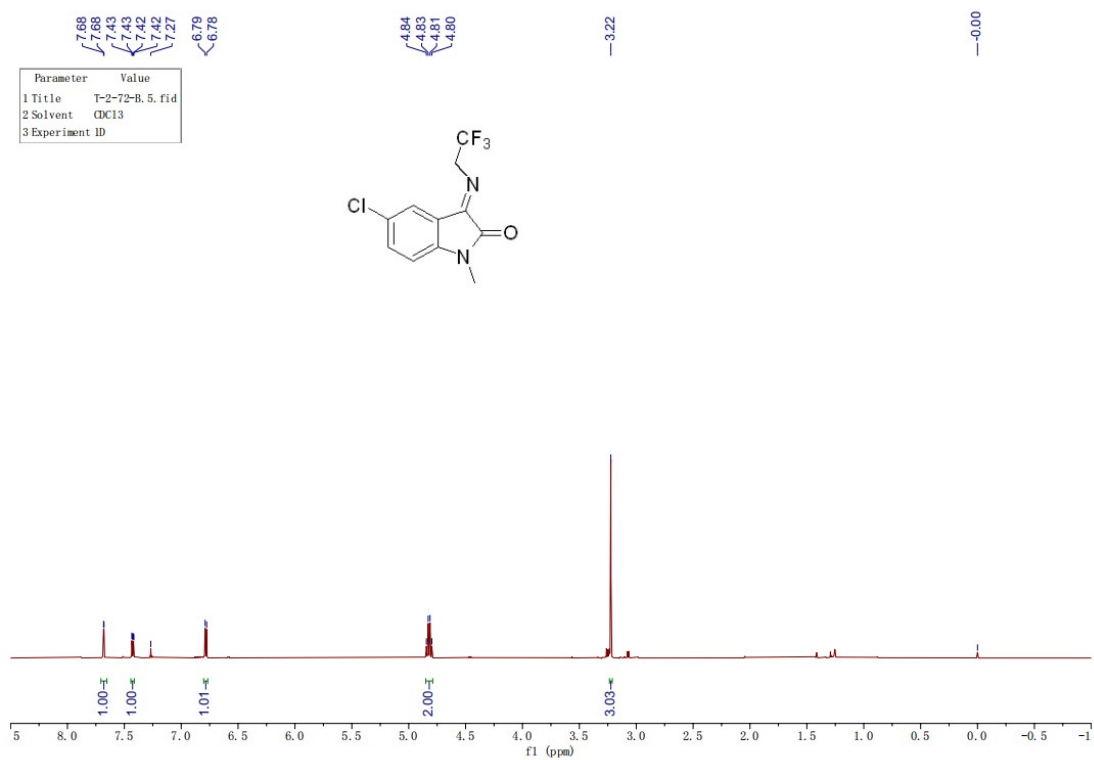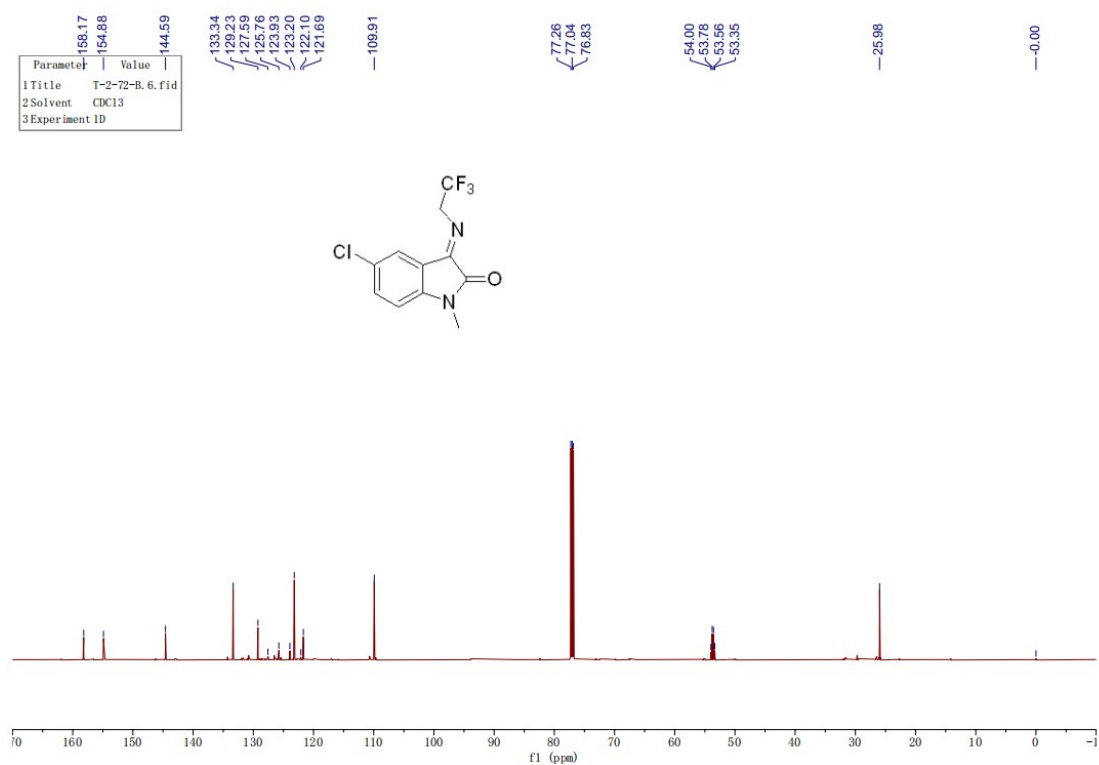

$^1\text{H-NMR}$  and  $^{13}\text{C-NMR}$  of **1c**

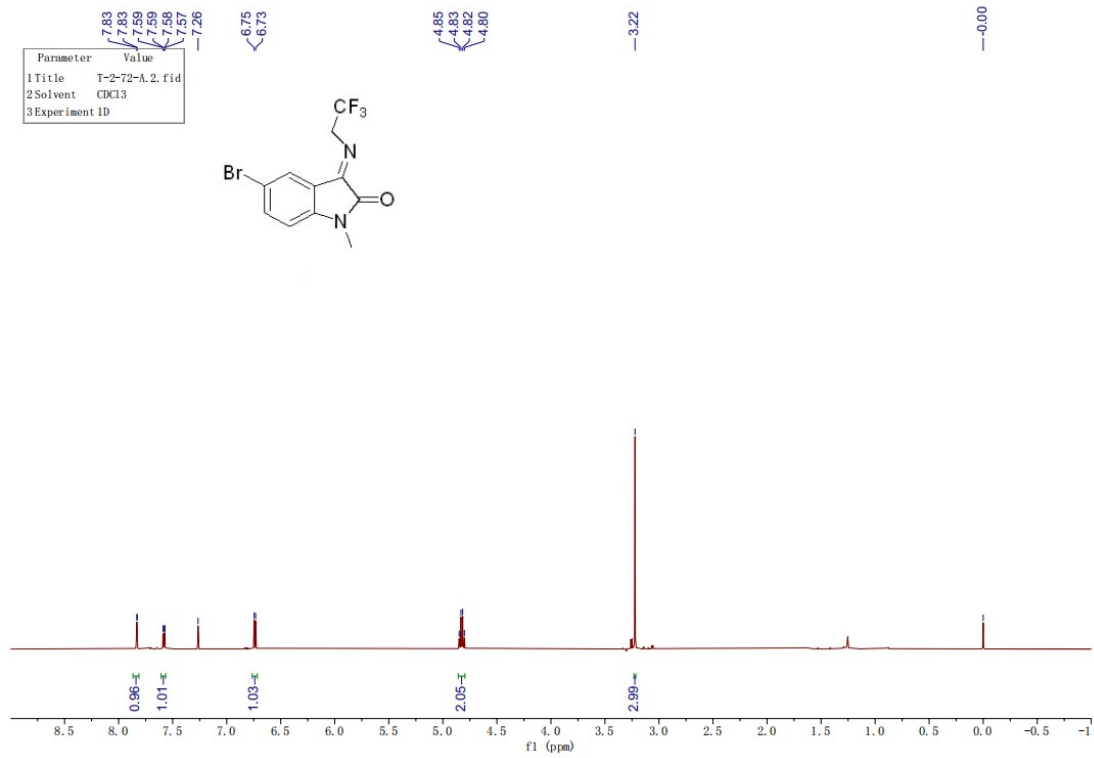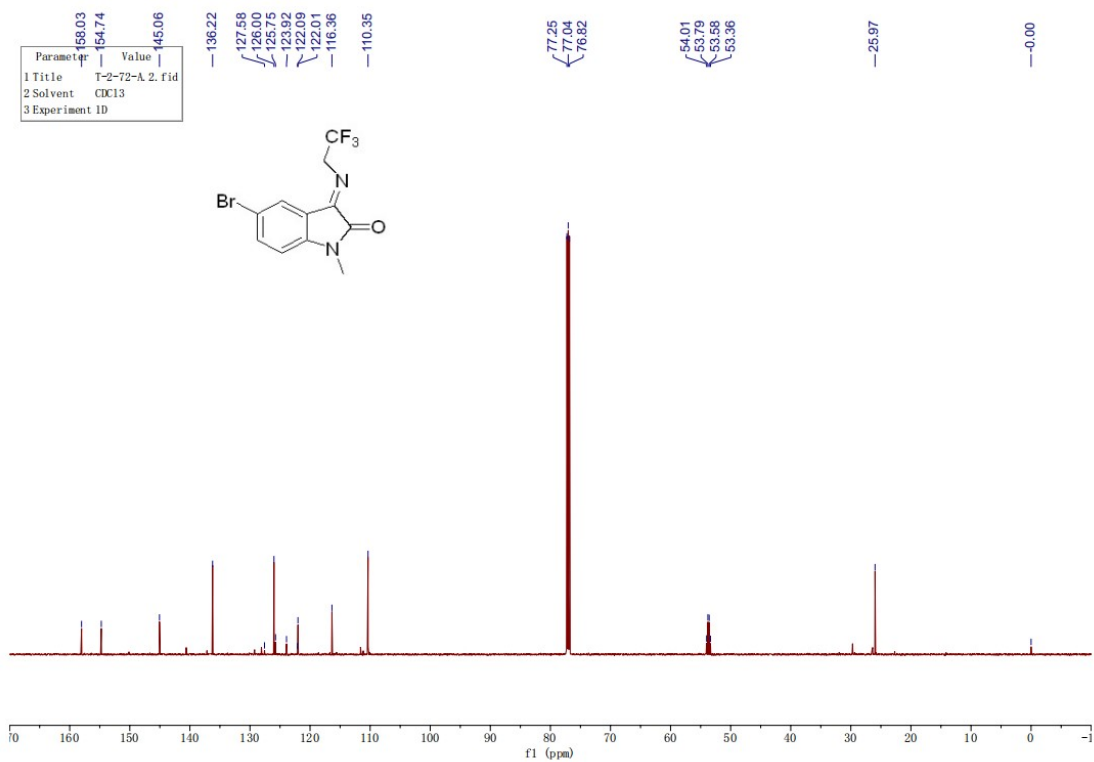

<sup>1</sup>H-NMR and <sup>13</sup>C-NMR of **1d**



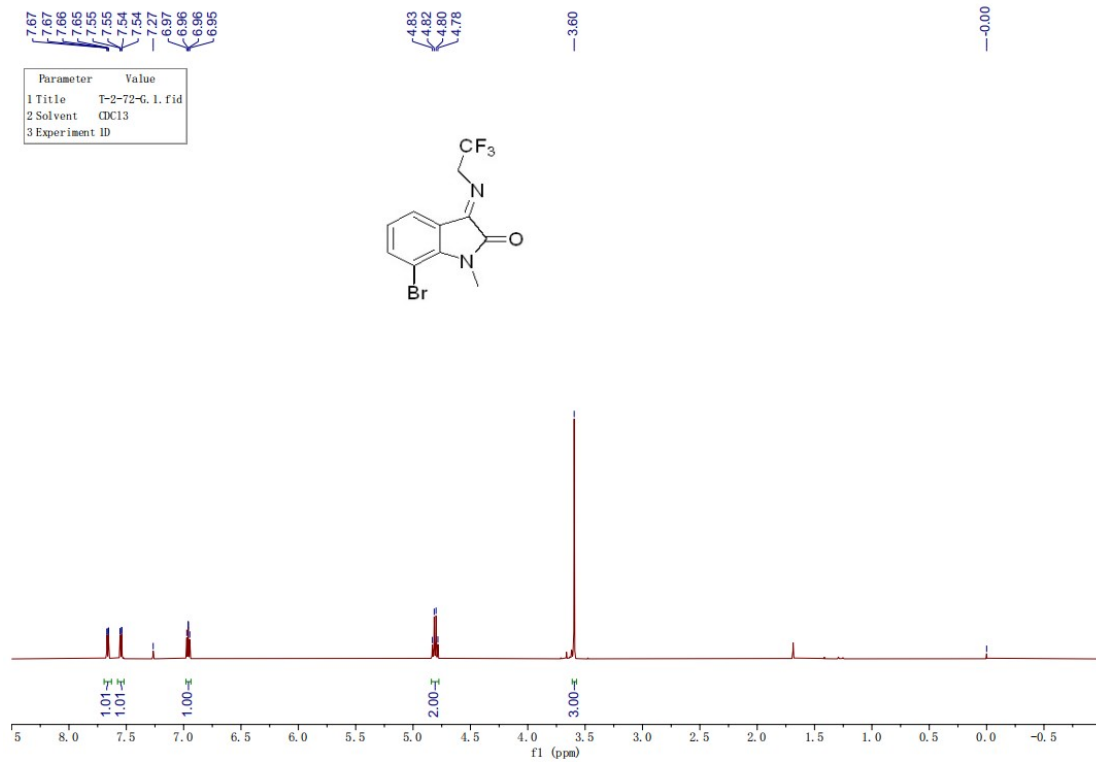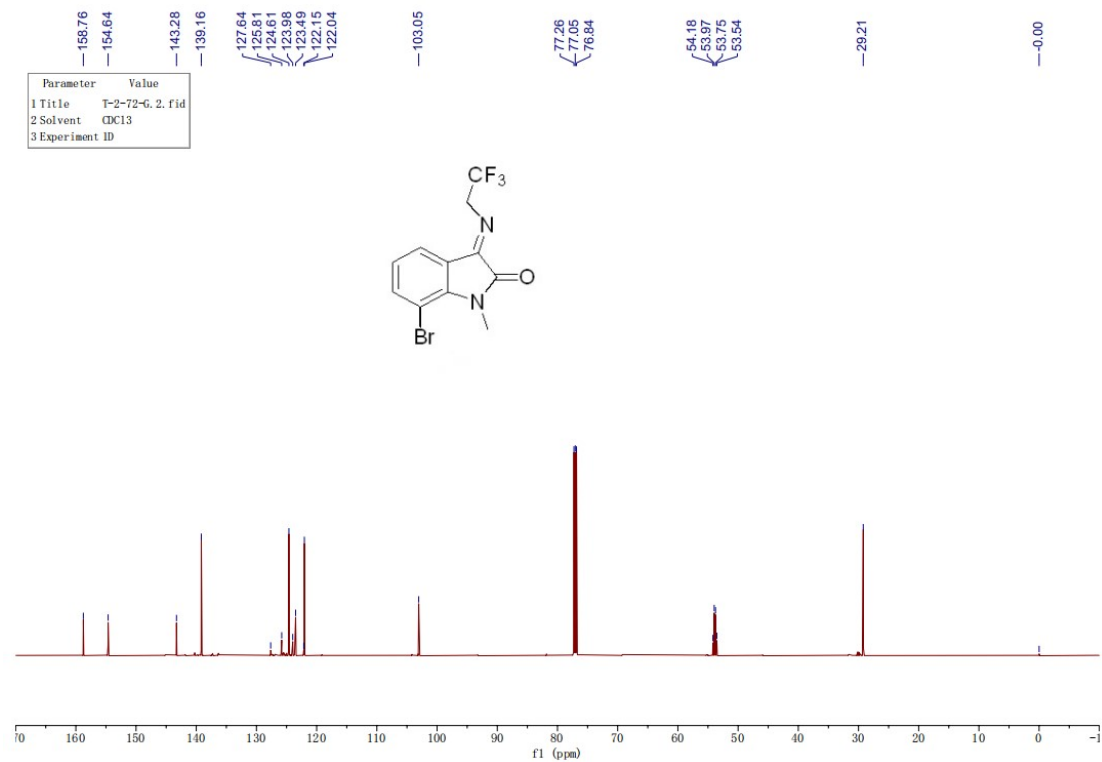

<sup>1</sup>H-NMR and <sup>13</sup>C-NMR of **1e**

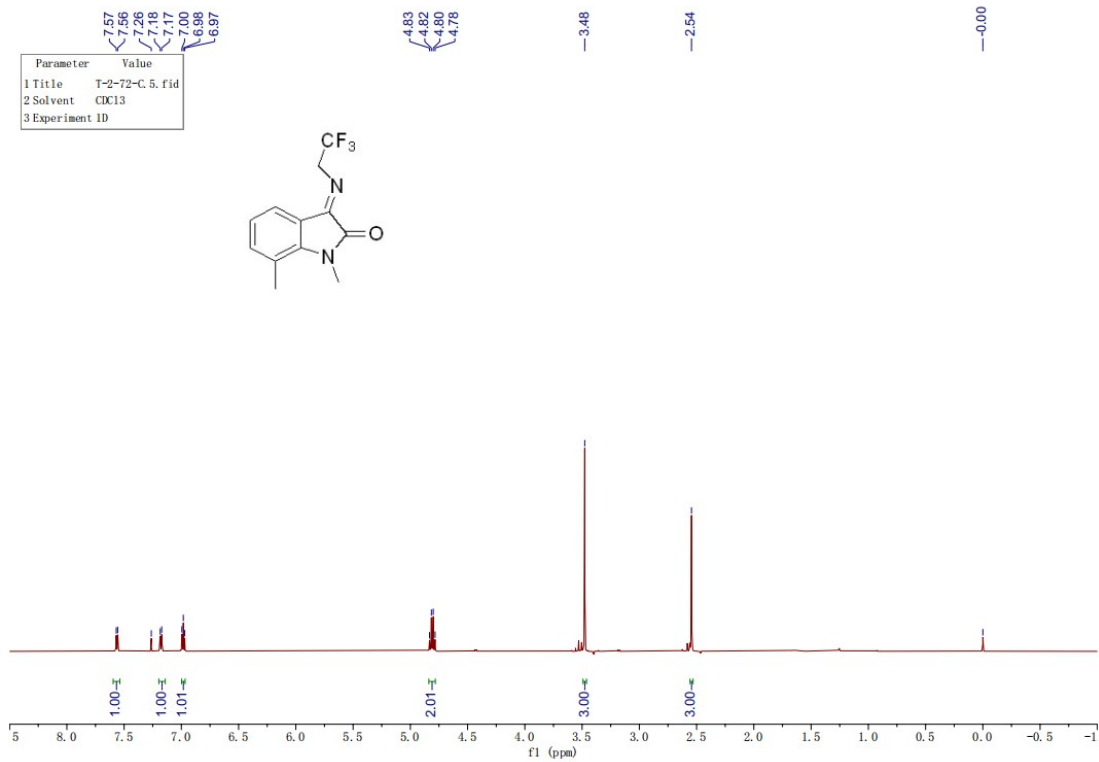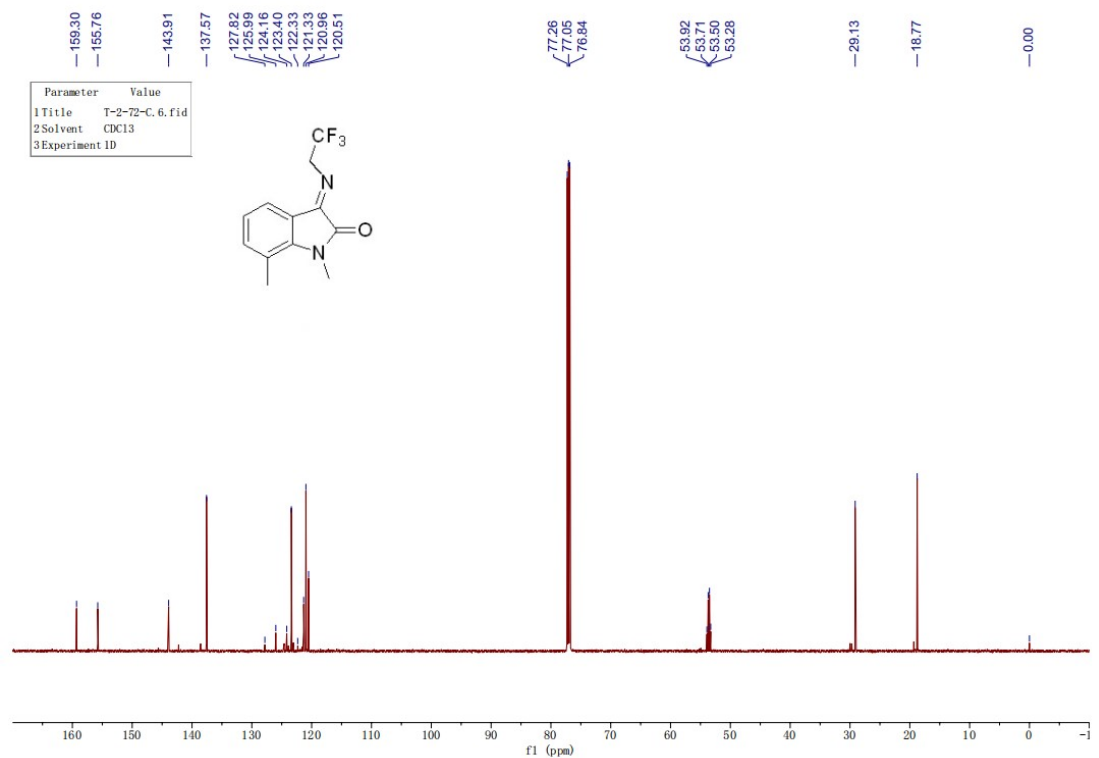

$^1\text{H-NMR}$  and  $^{13}\text{C-NMR}$  of **1f**

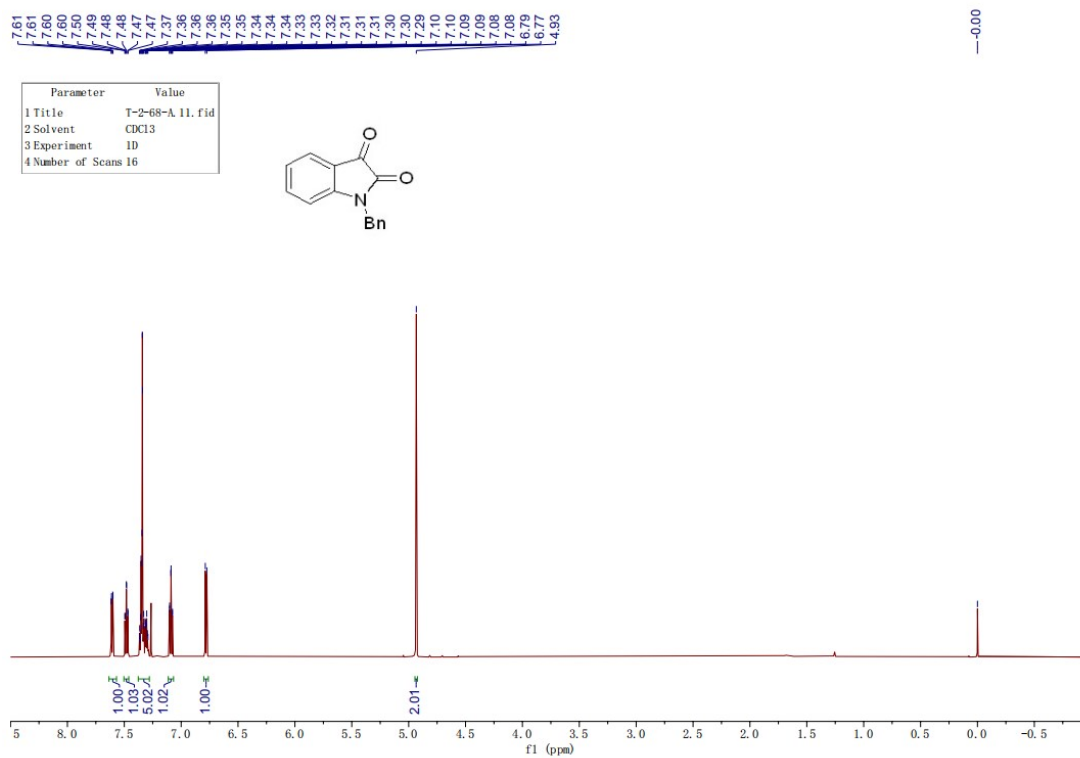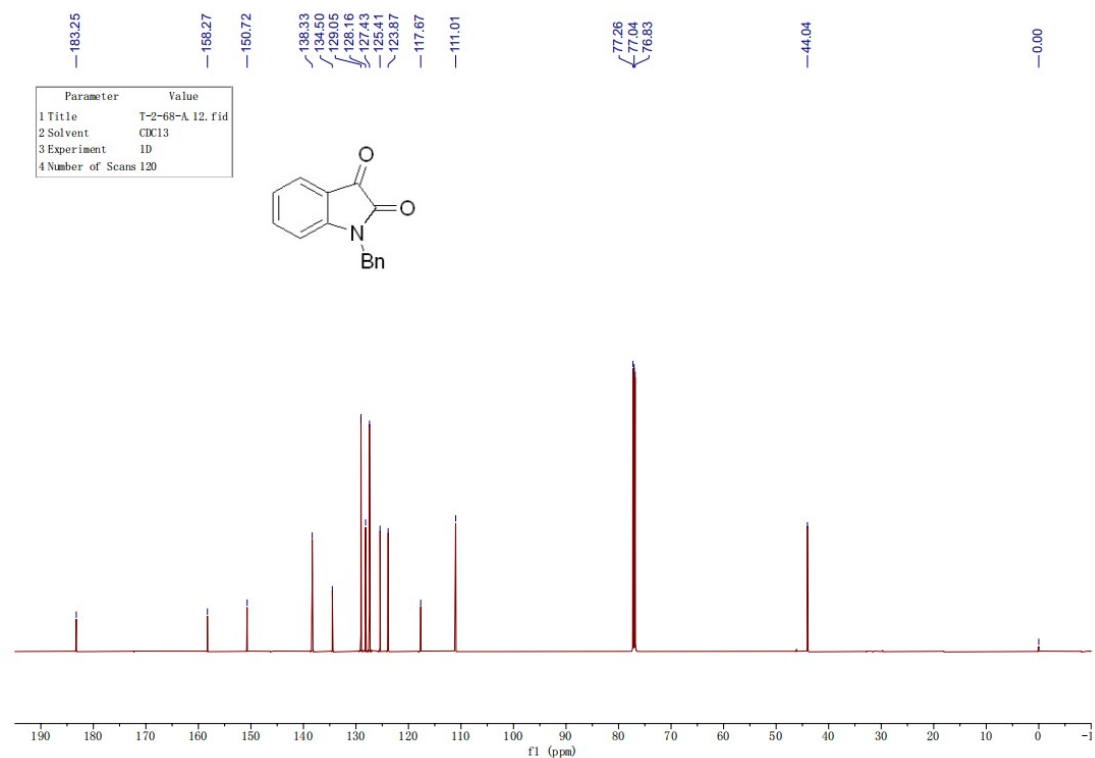

$^1\text{H-NMR}$  and  $^{13}\text{C-NMR}$  of **1g'**

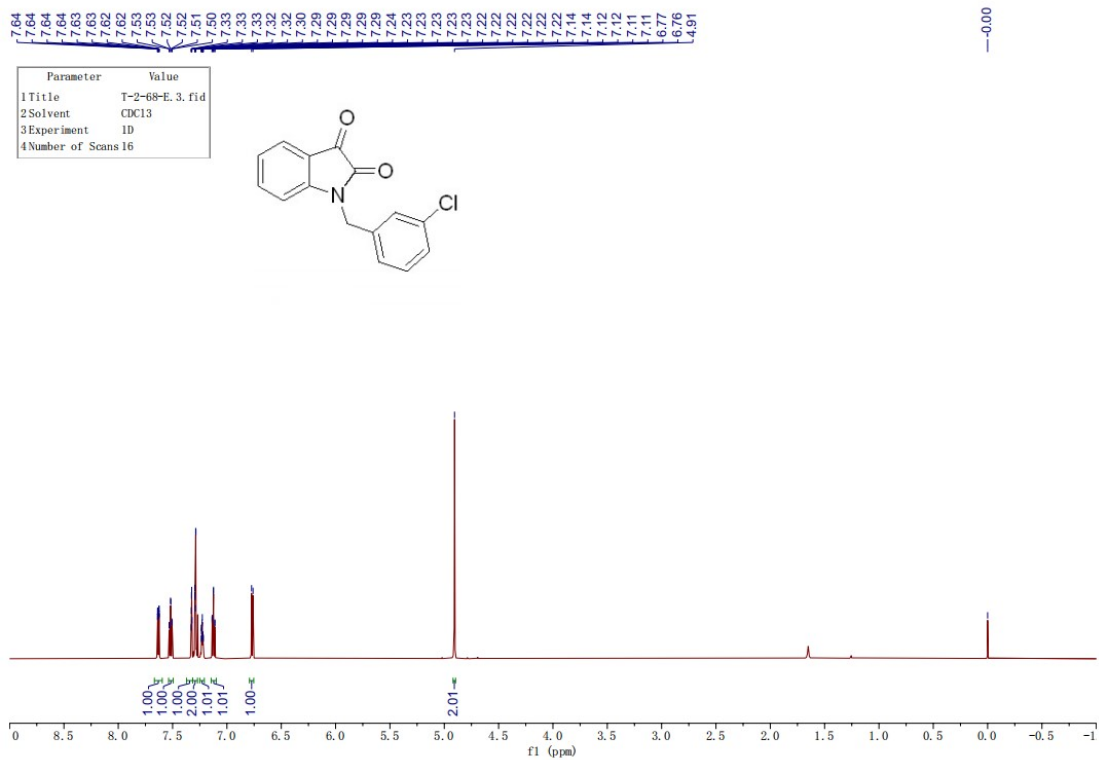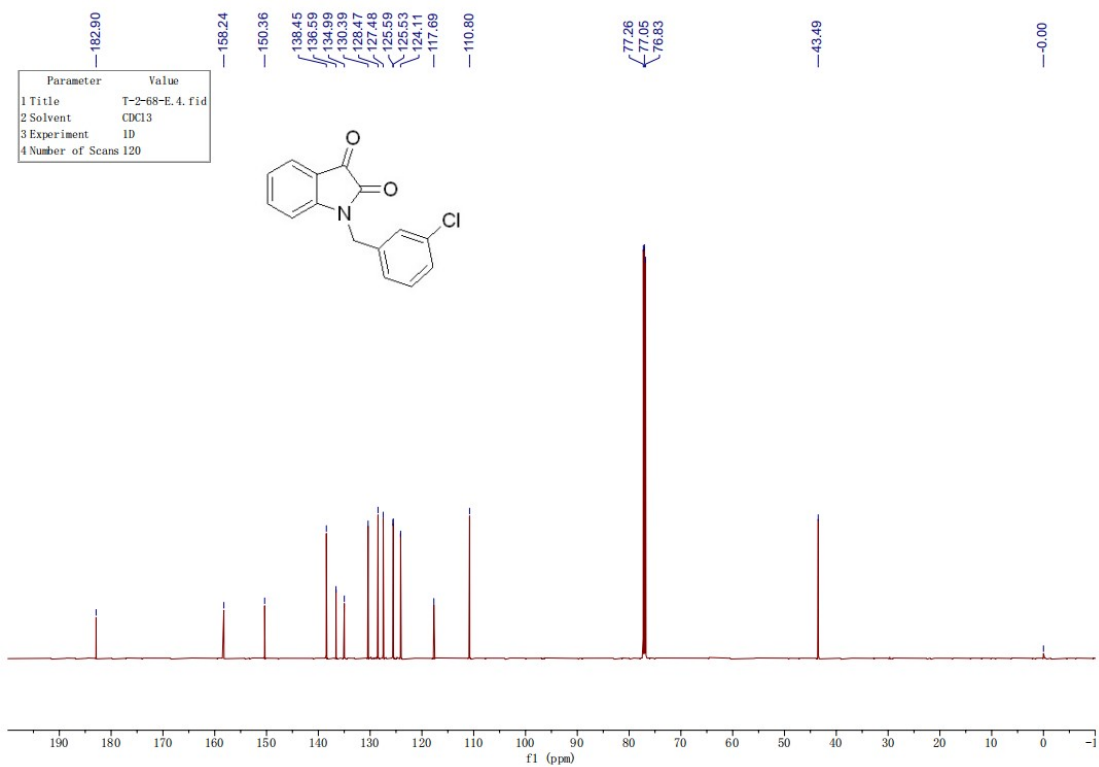

$^1\text{H-NMR}$  and  $^{13}\text{C-NMR}$  of **1h'**

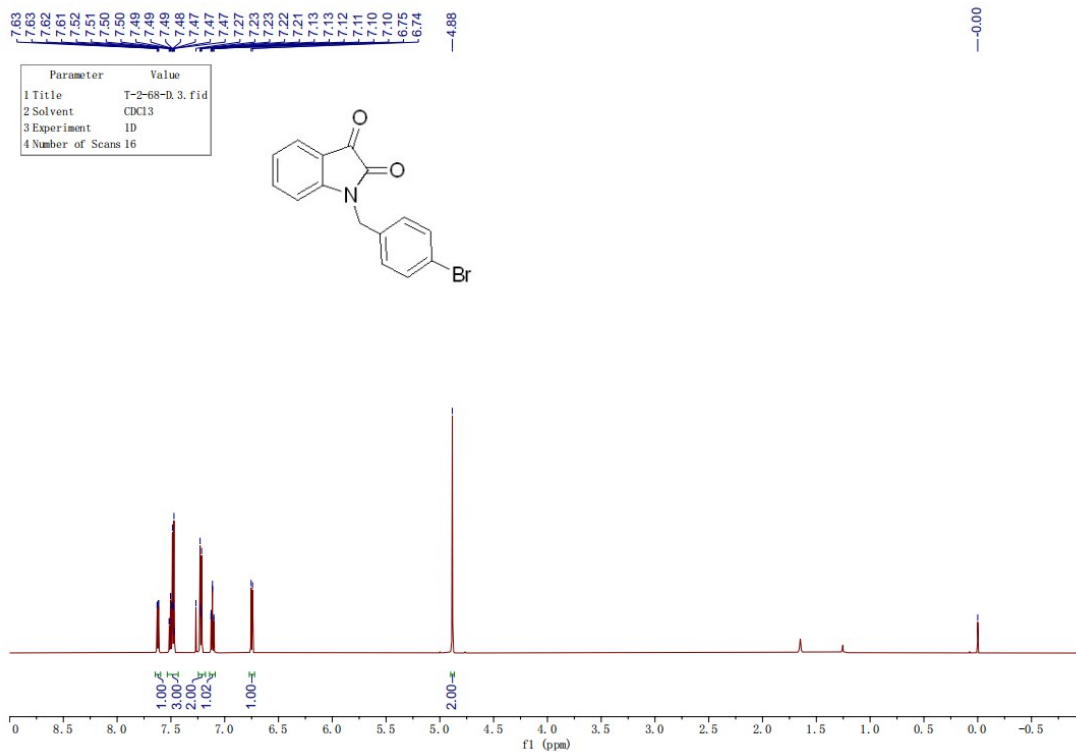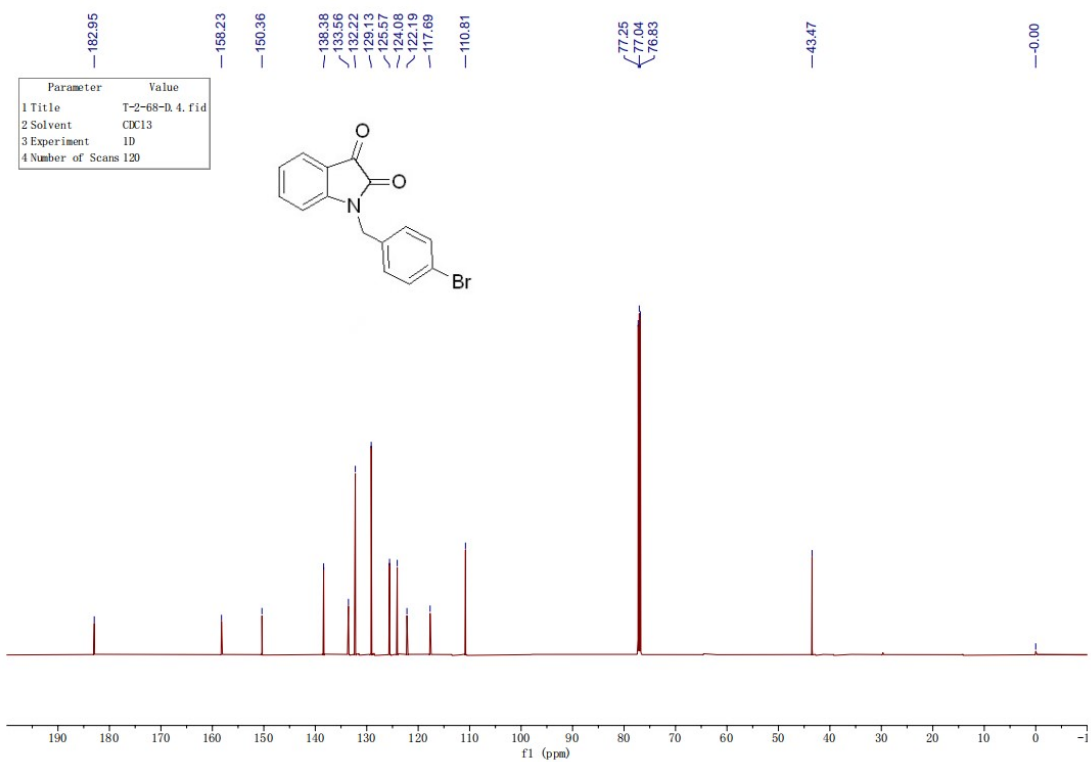

$^1\text{H-NMR}$  and  $^{13}\text{C-NMR}$  of **1i**

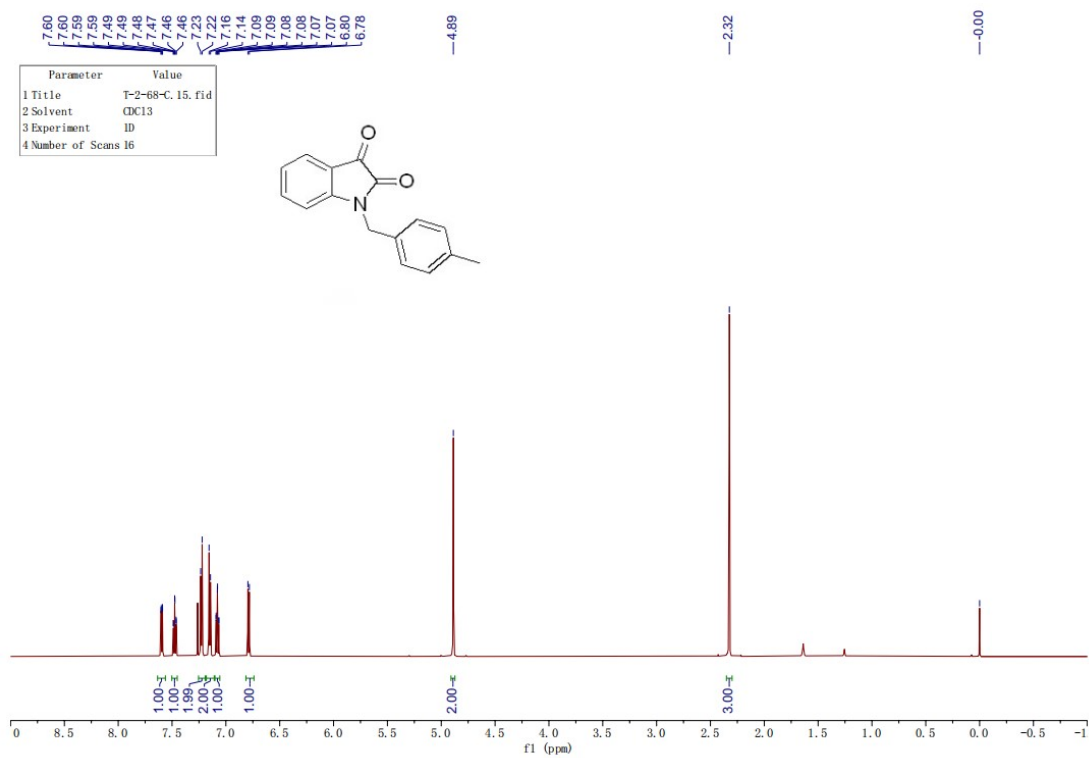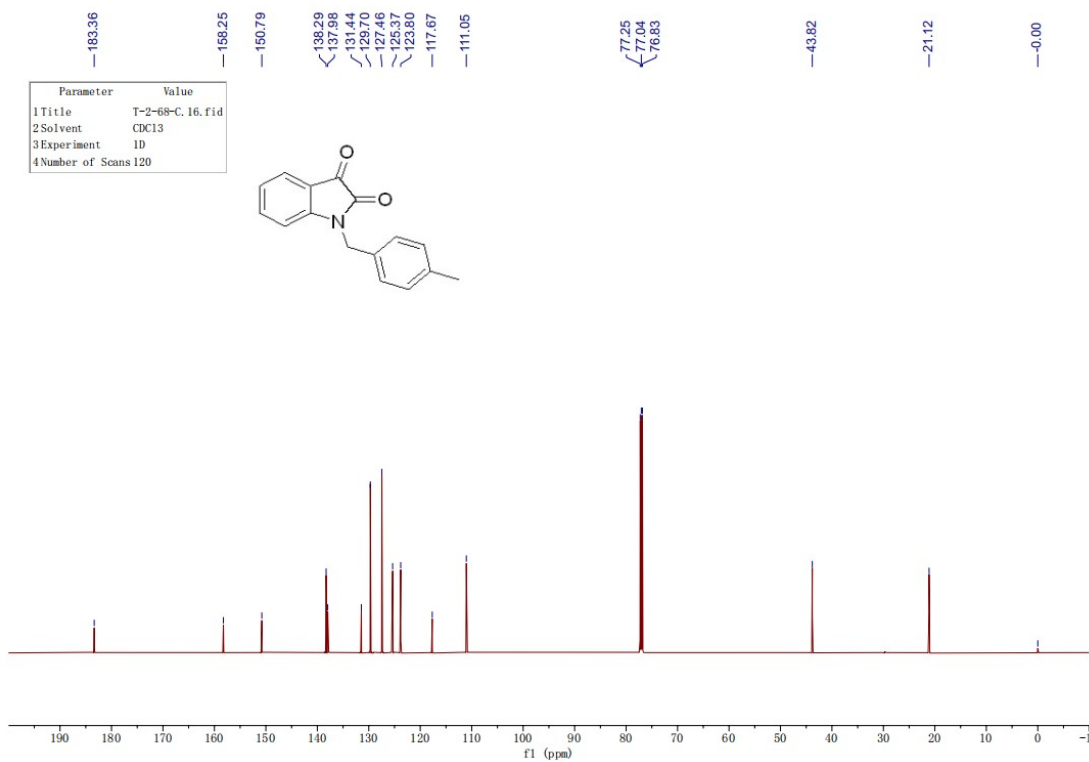

$^1\text{H-NMR}$  and  $^{13}\text{C-NMR}$  of **1j**'

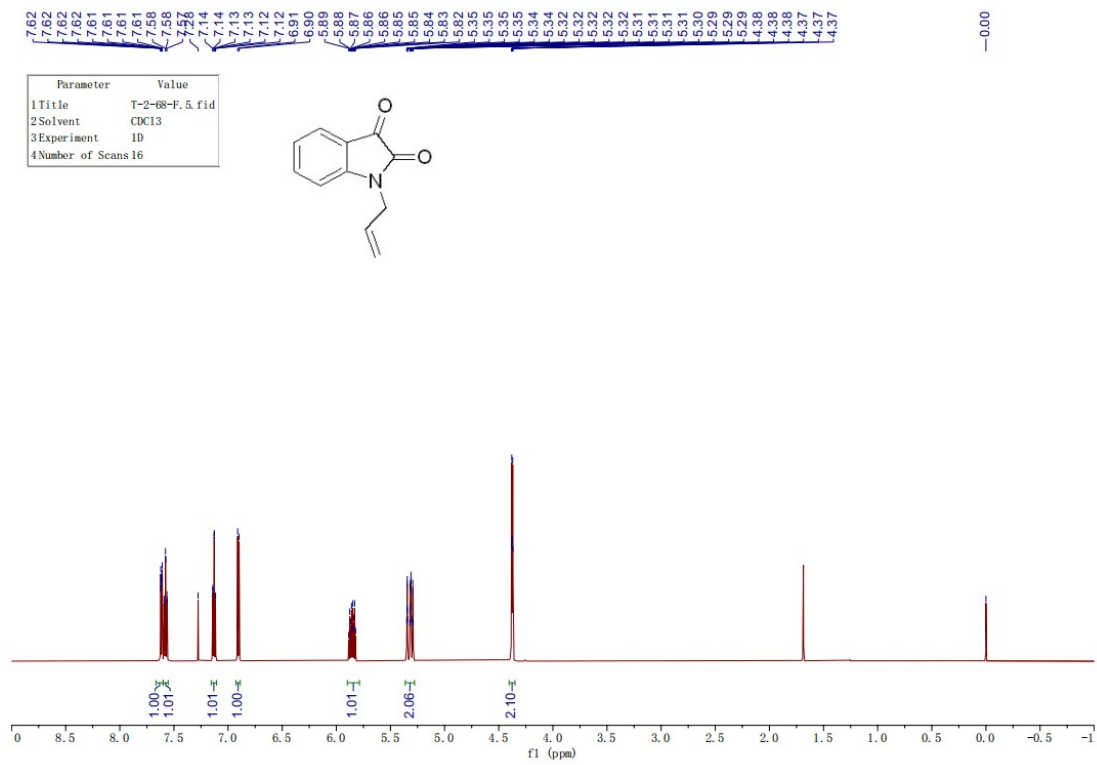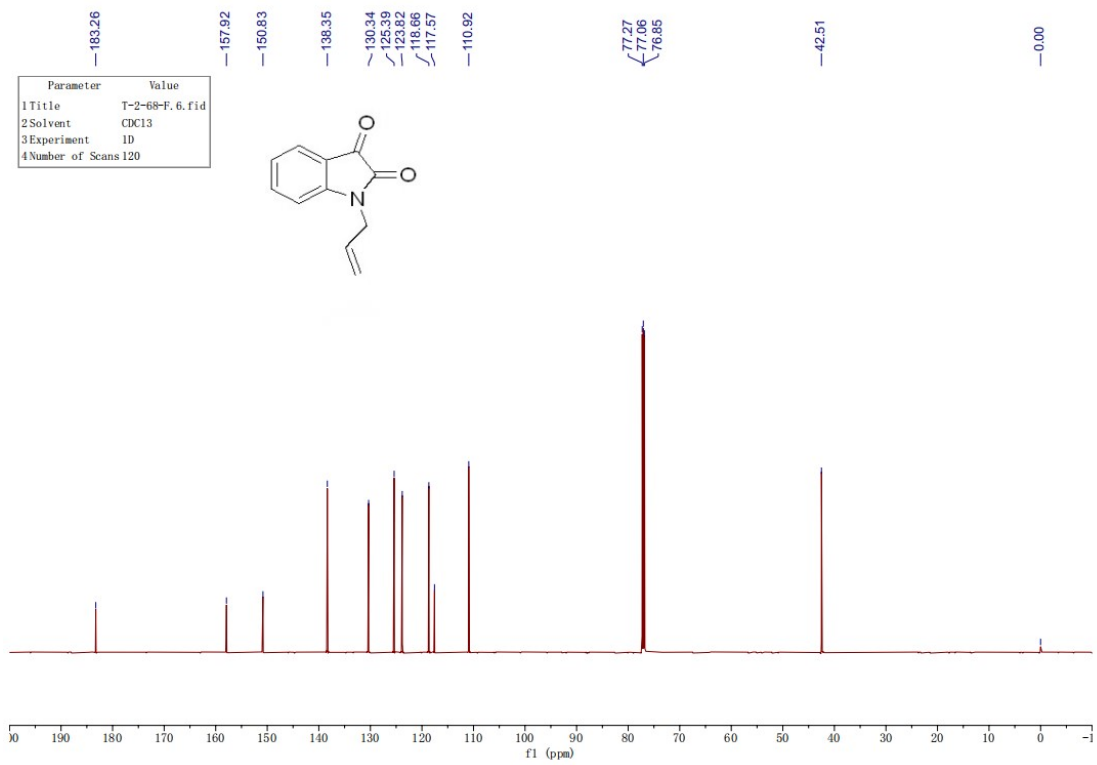

<sup>1</sup>H-NMR and <sup>13</sup>C-NMR of 1k'

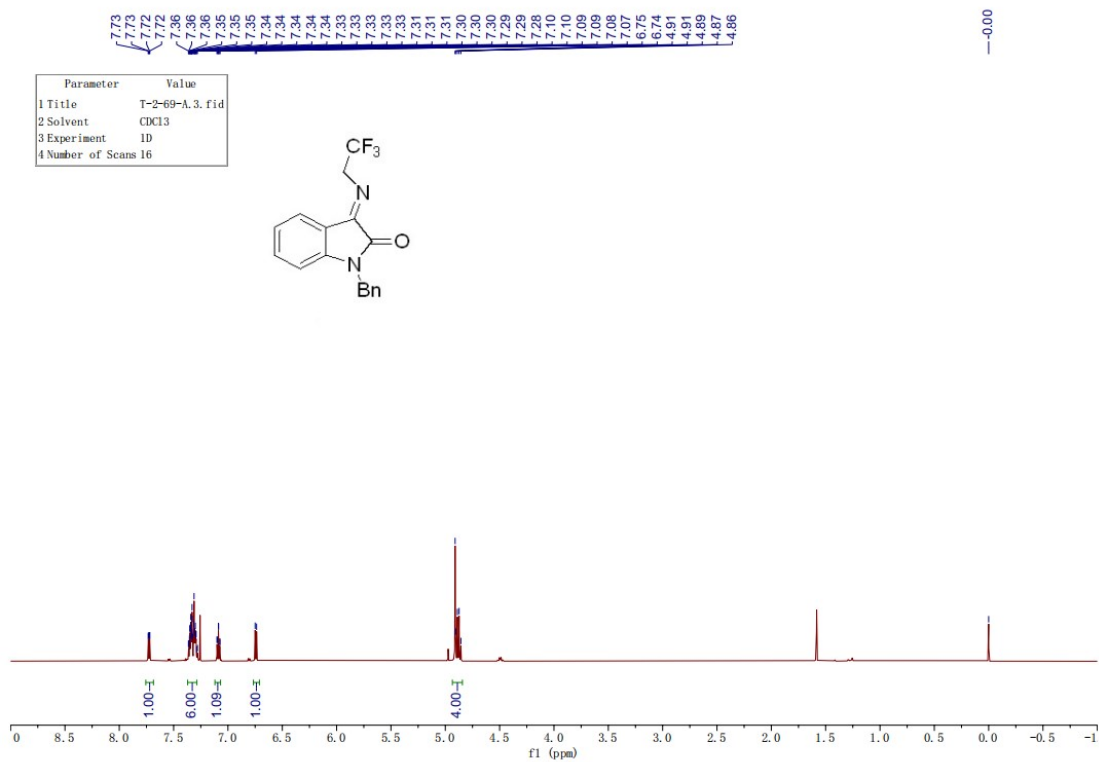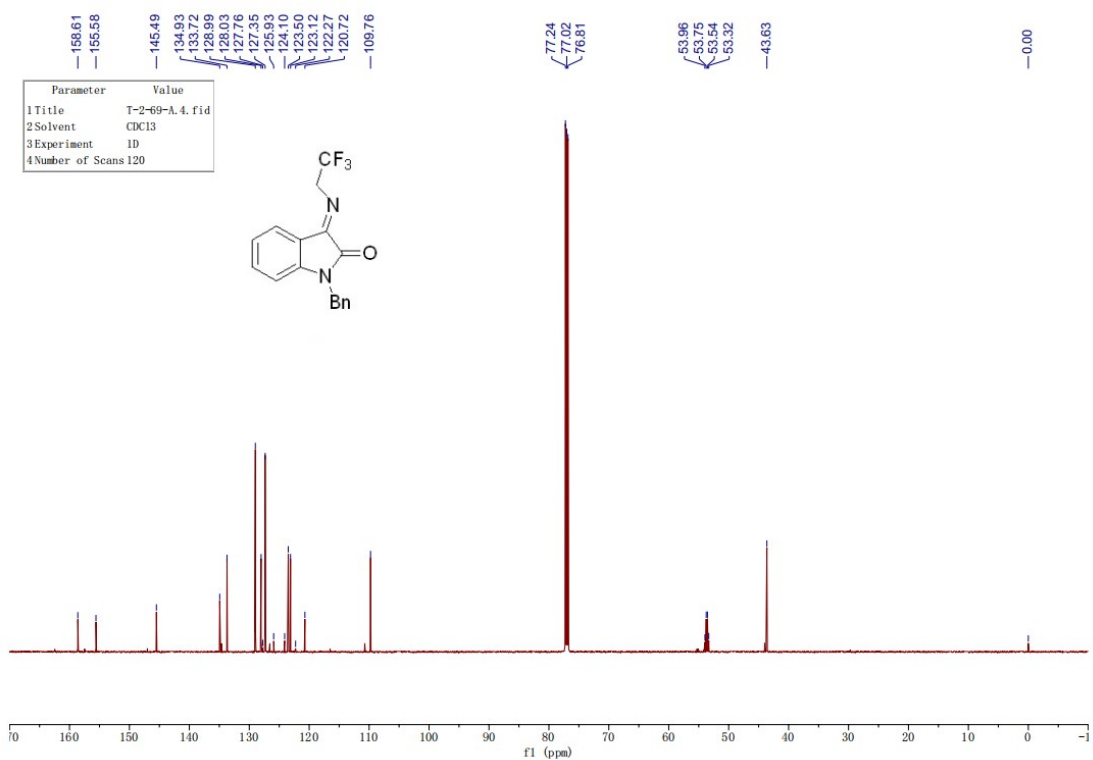

$^1\text{H-NMR}$  and  $^{13}\text{C-NMR}$  of **1g**



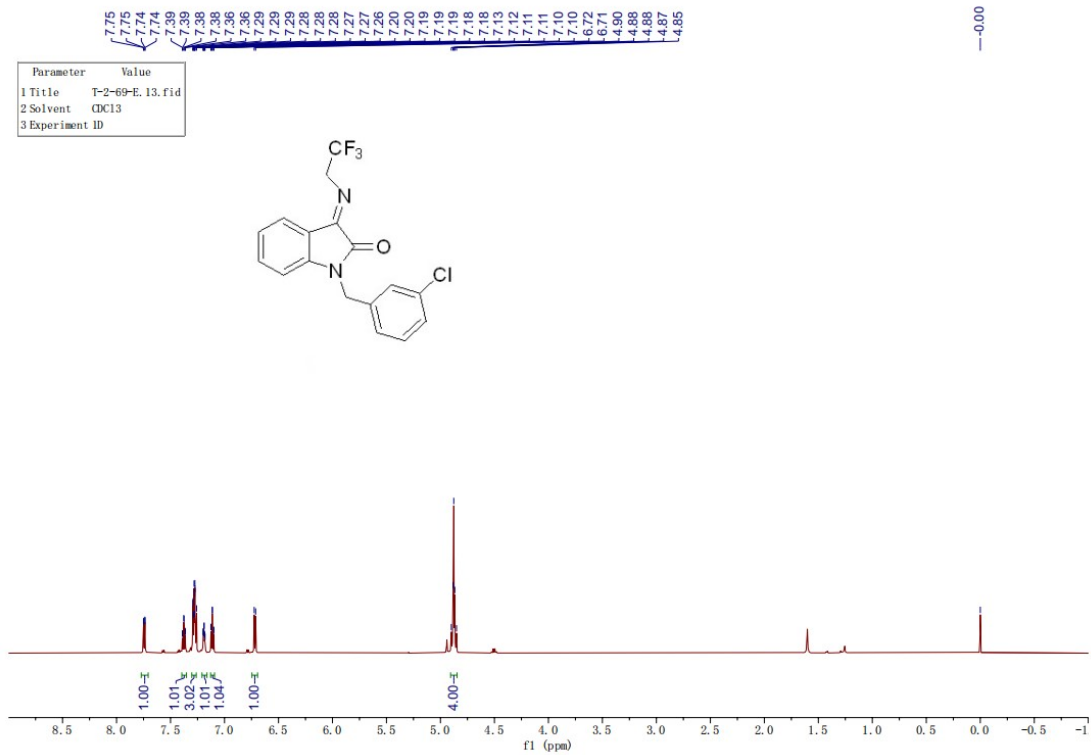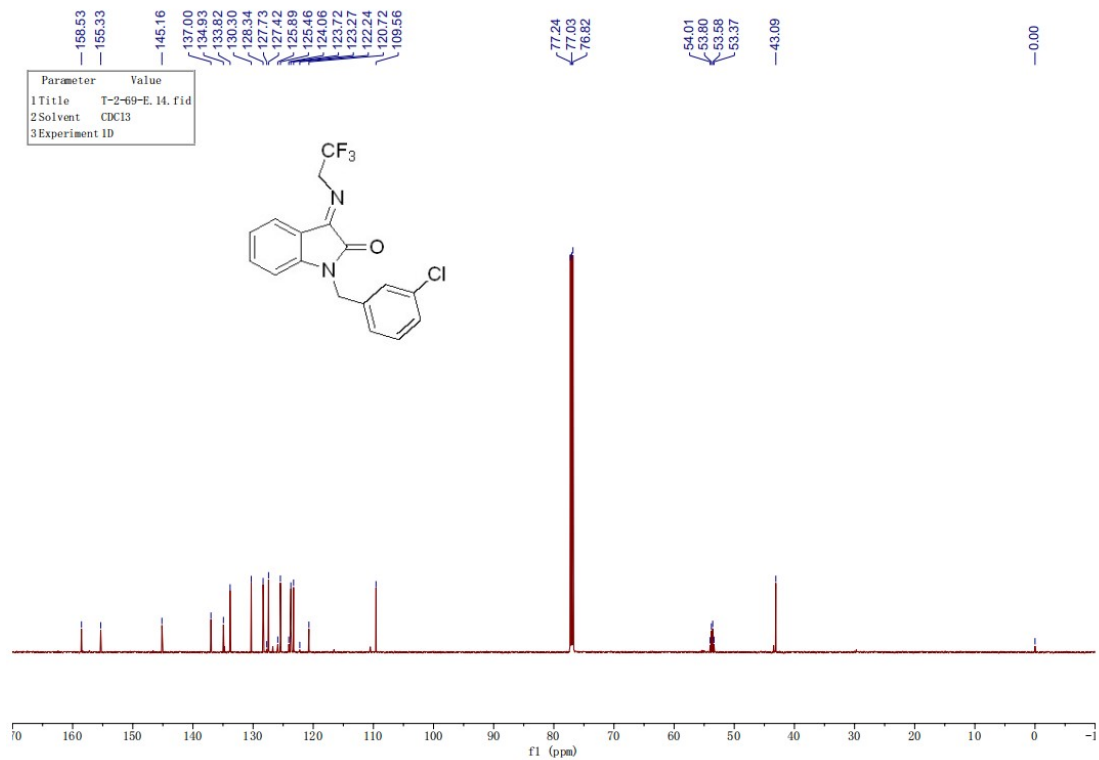

<sup>1</sup>H-NMR and <sup>13</sup>C-NMR of **1h**

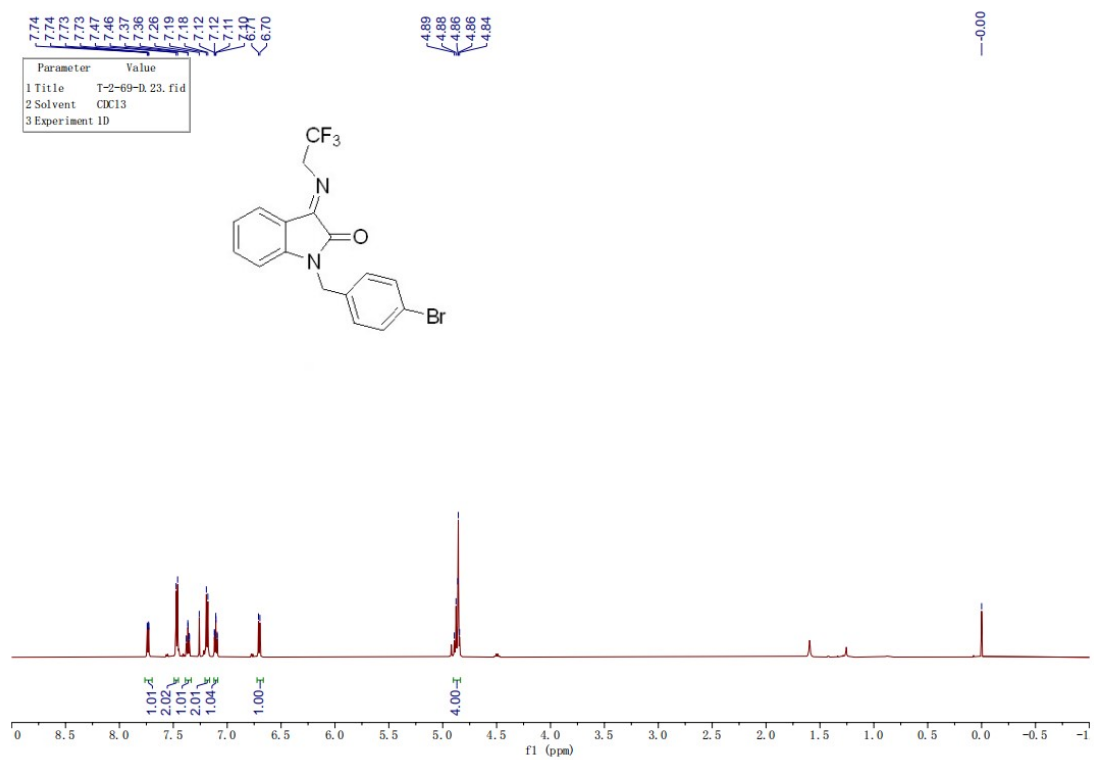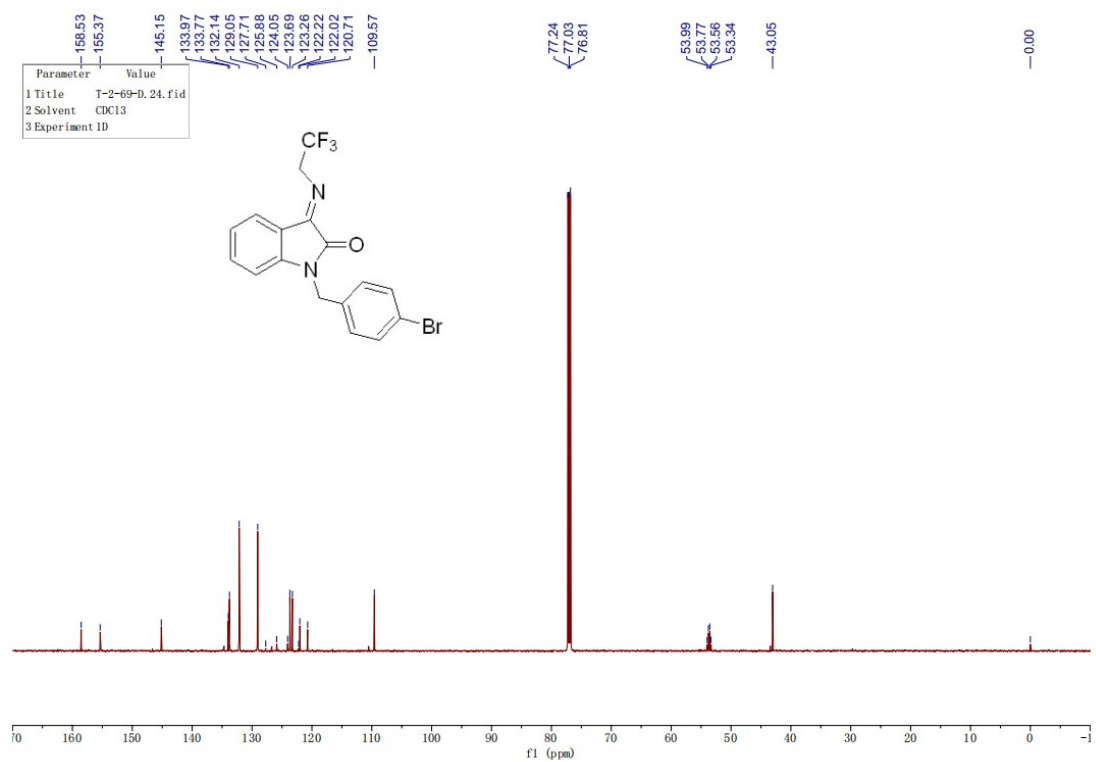

$^1\text{H-NMR}$  and  $^{13}\text{C-NMR}$  of **1i**

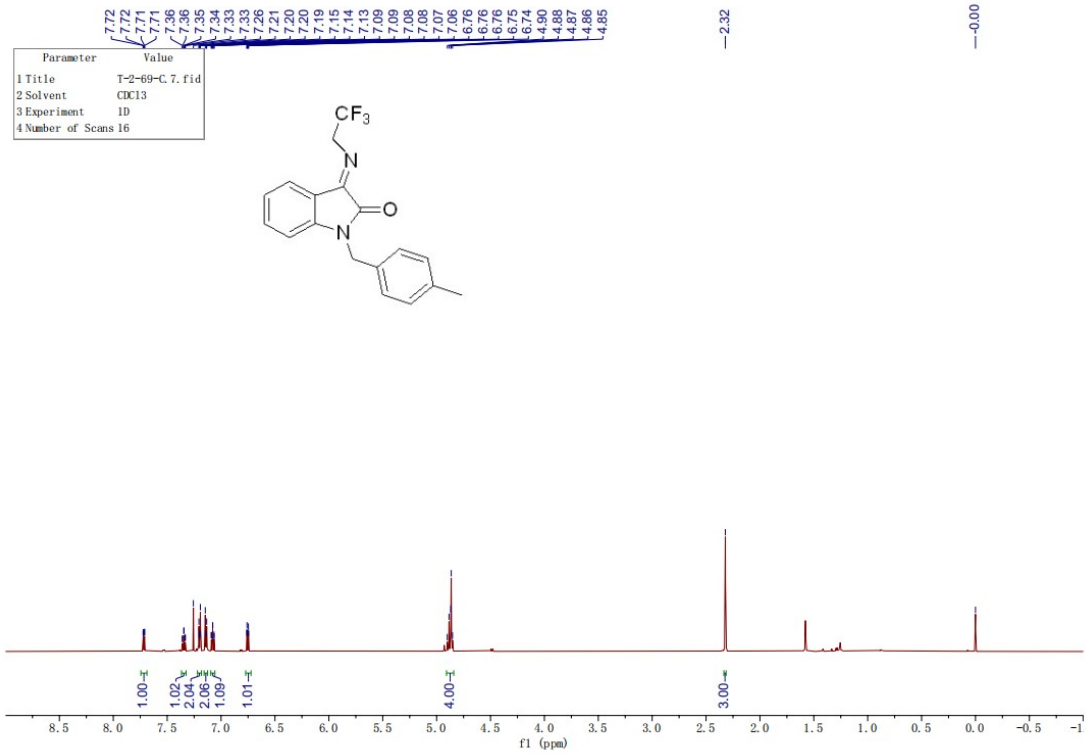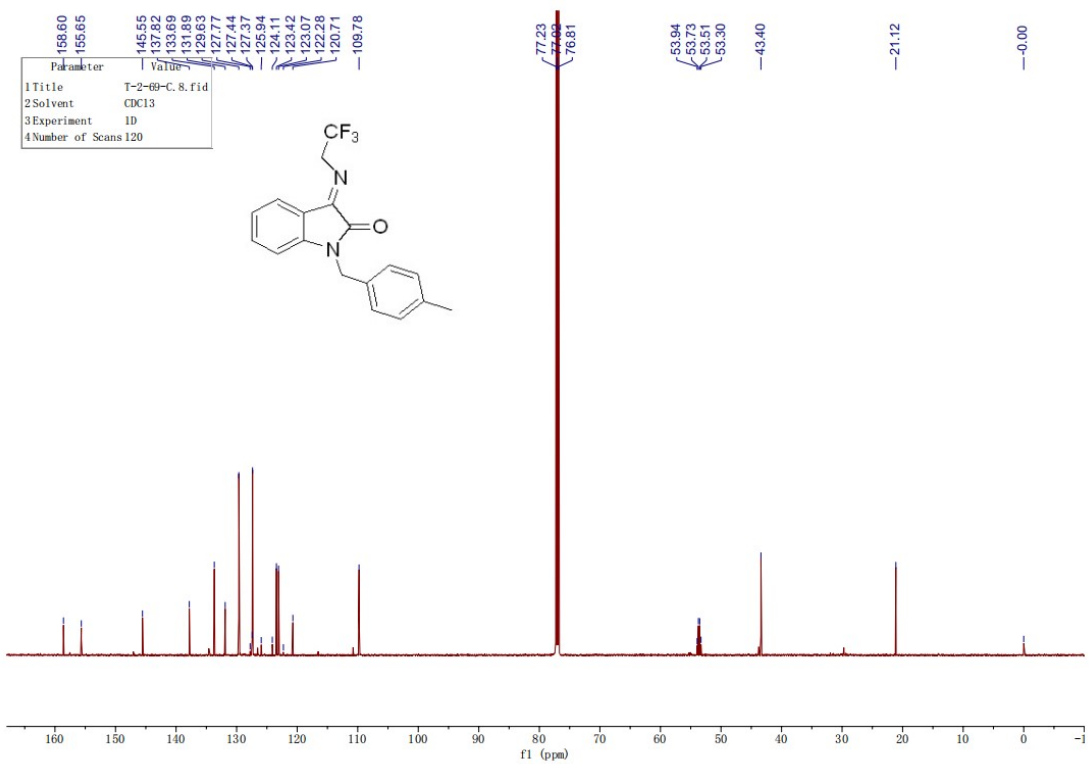

$^1\text{H-NMR}$  and  $^{13}\text{C-NMR}$  of **1j**

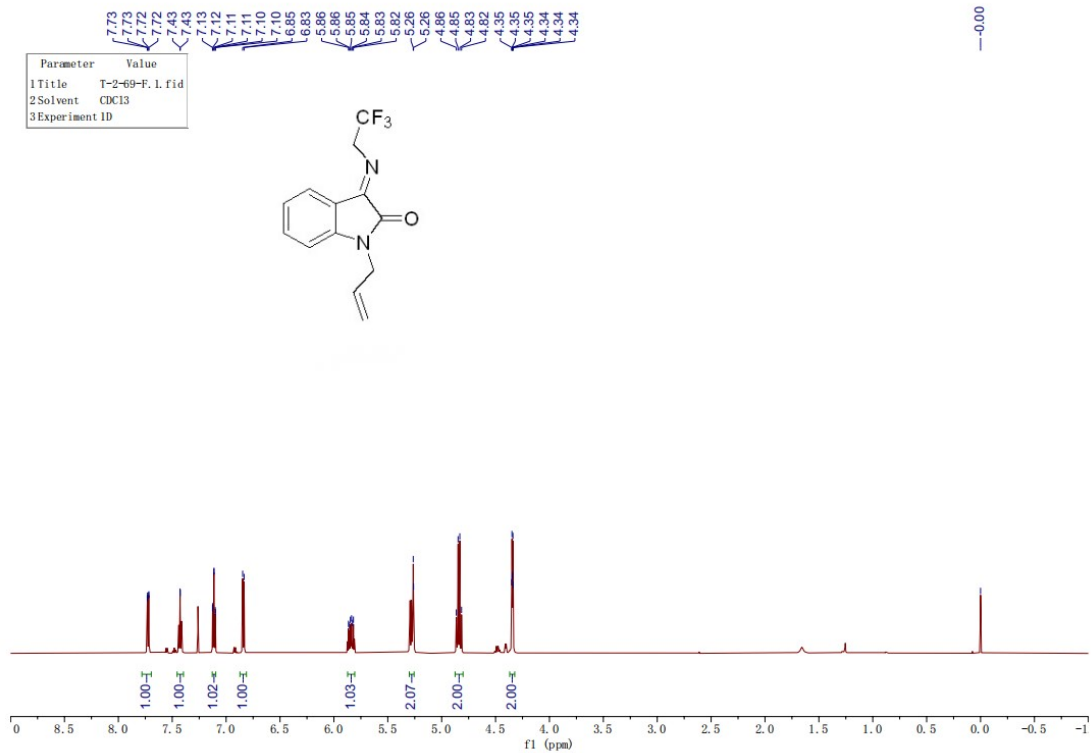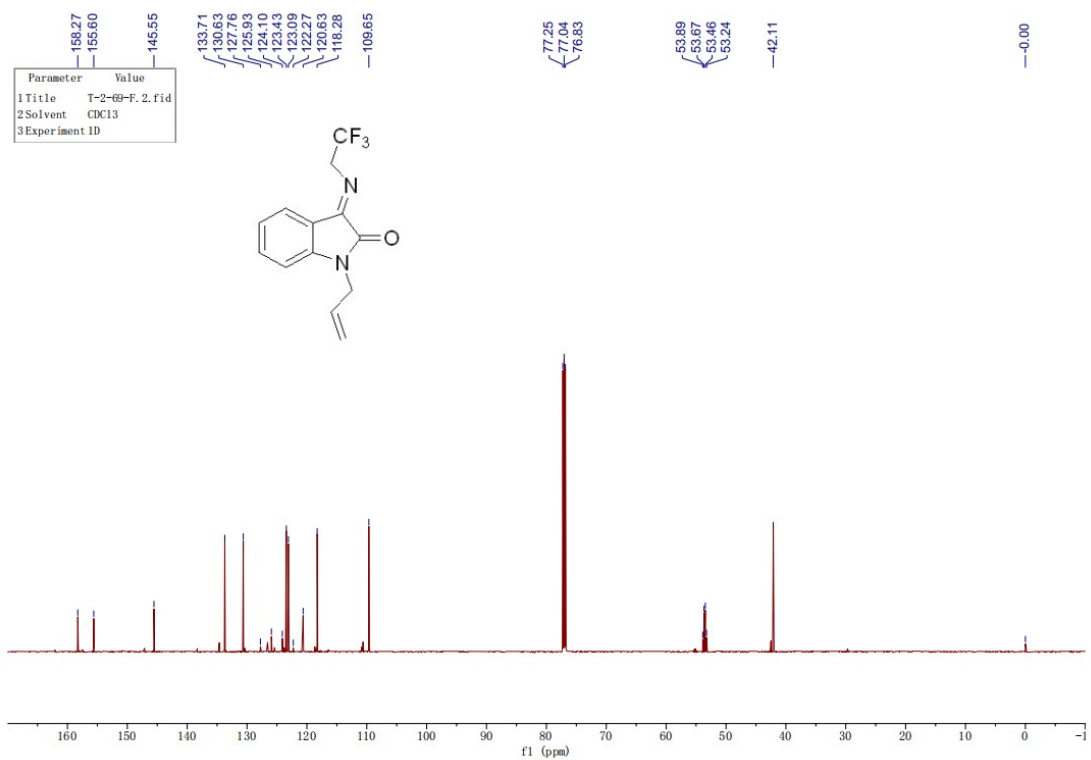

$^1\text{H-NMR}$  and  $^{13}\text{C-NMR}$  of **1k**

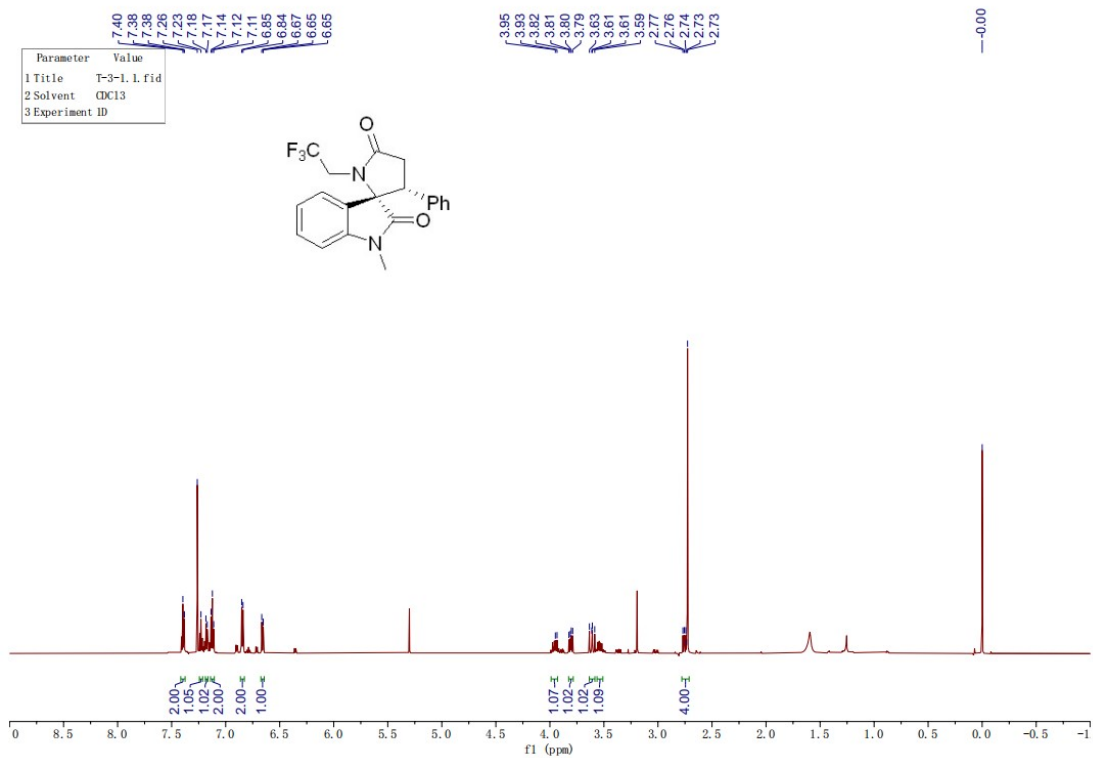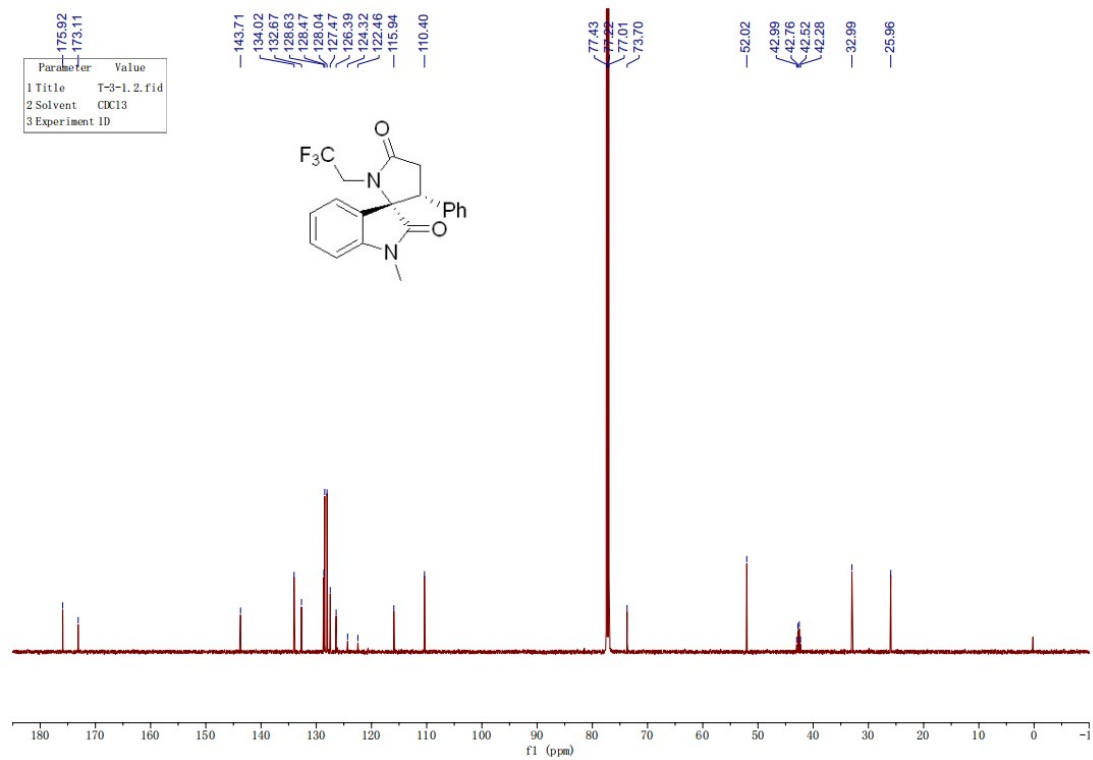

<sup>1</sup>H-NMR and <sup>13</sup>C-NMR of 4a

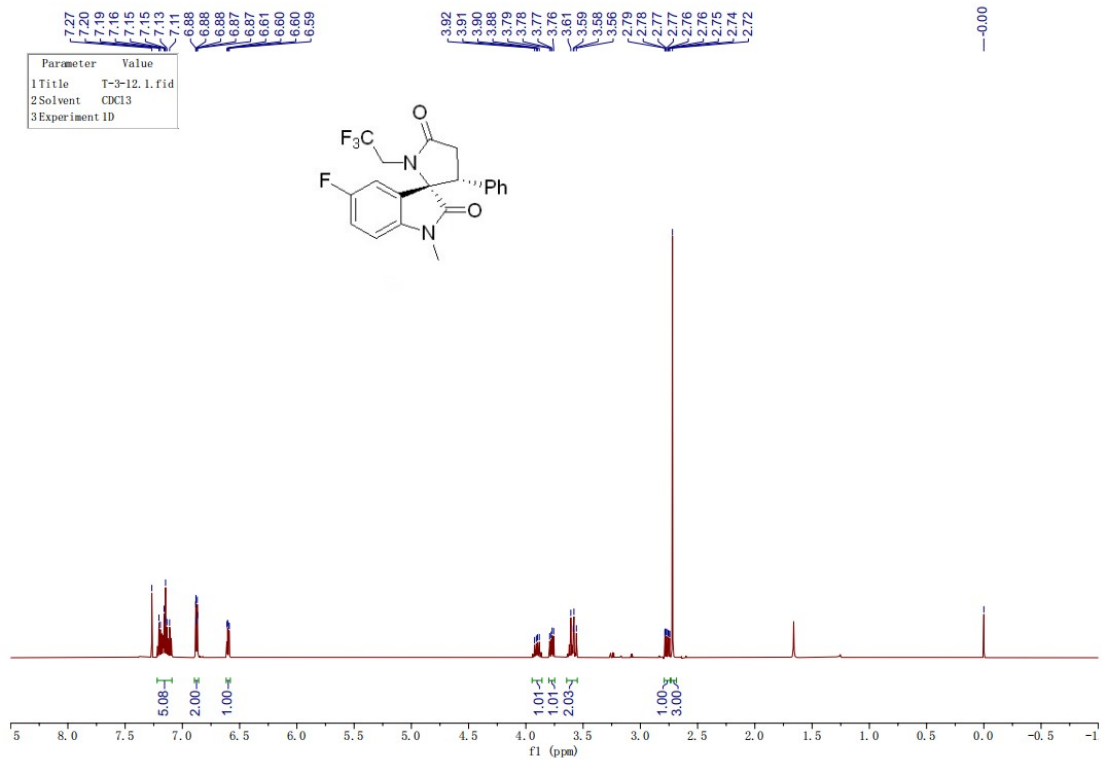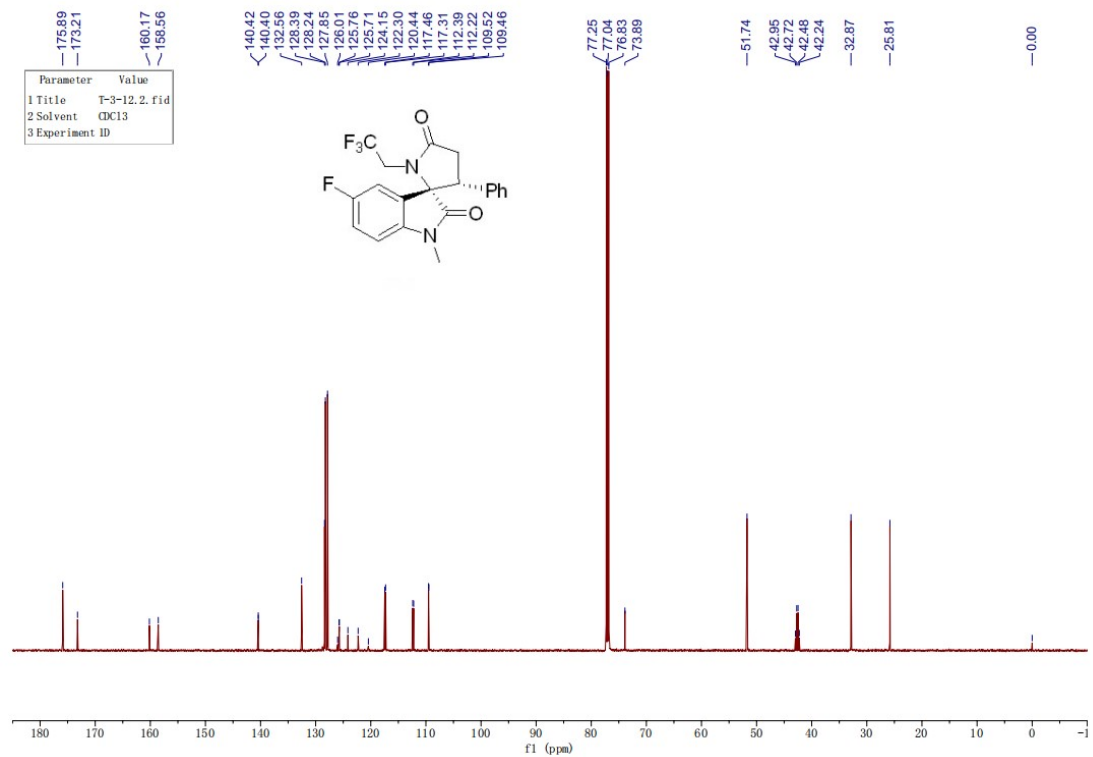

<sup>1</sup>H-NMR and <sup>13</sup>C-NMR of **4b**

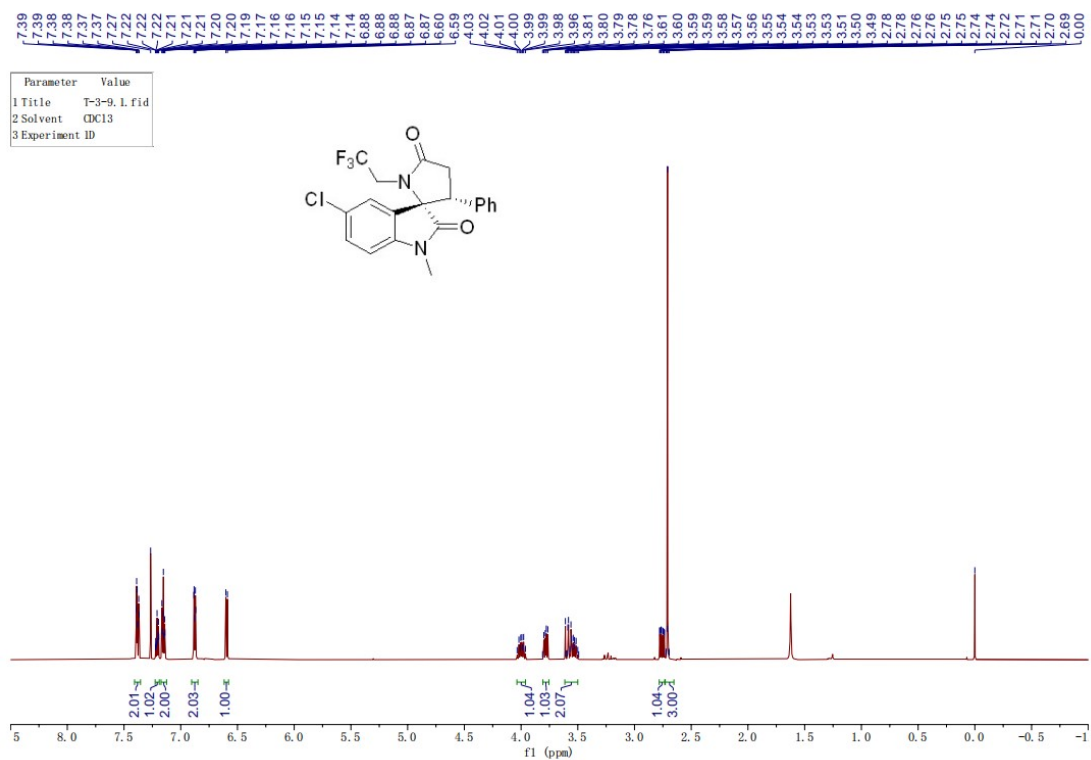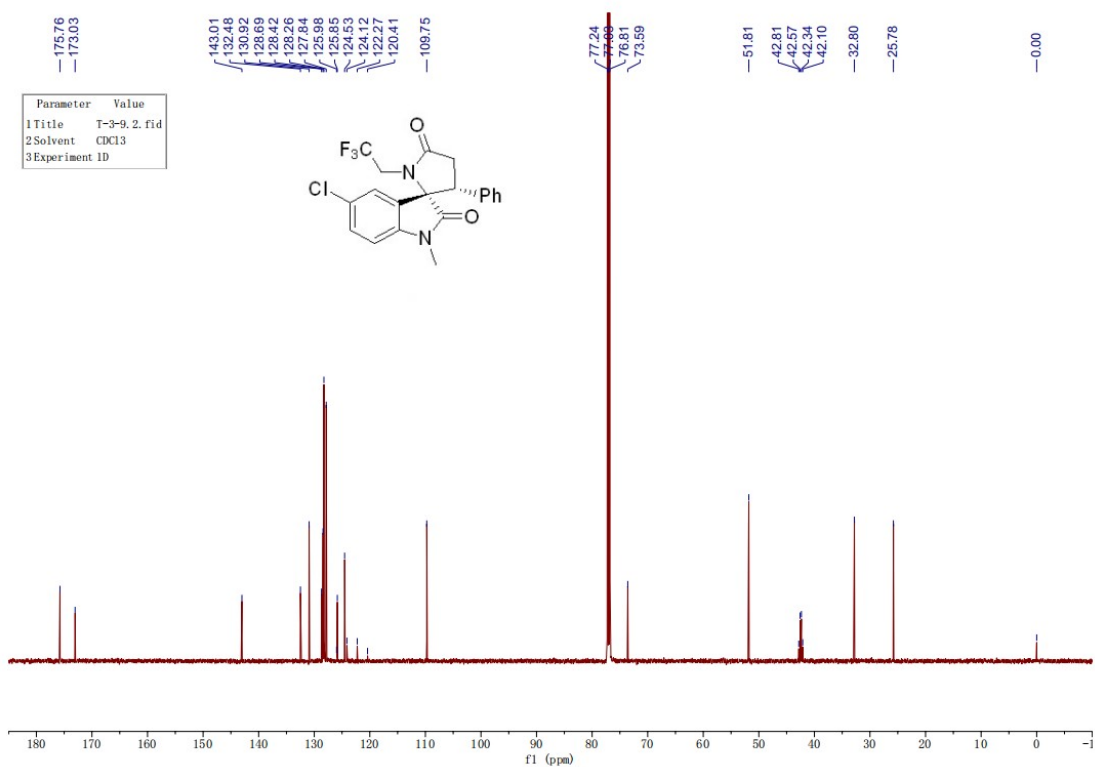

$^1\text{H-NMR}$  and  $^{13}\text{C-NMR}$  of **4c**

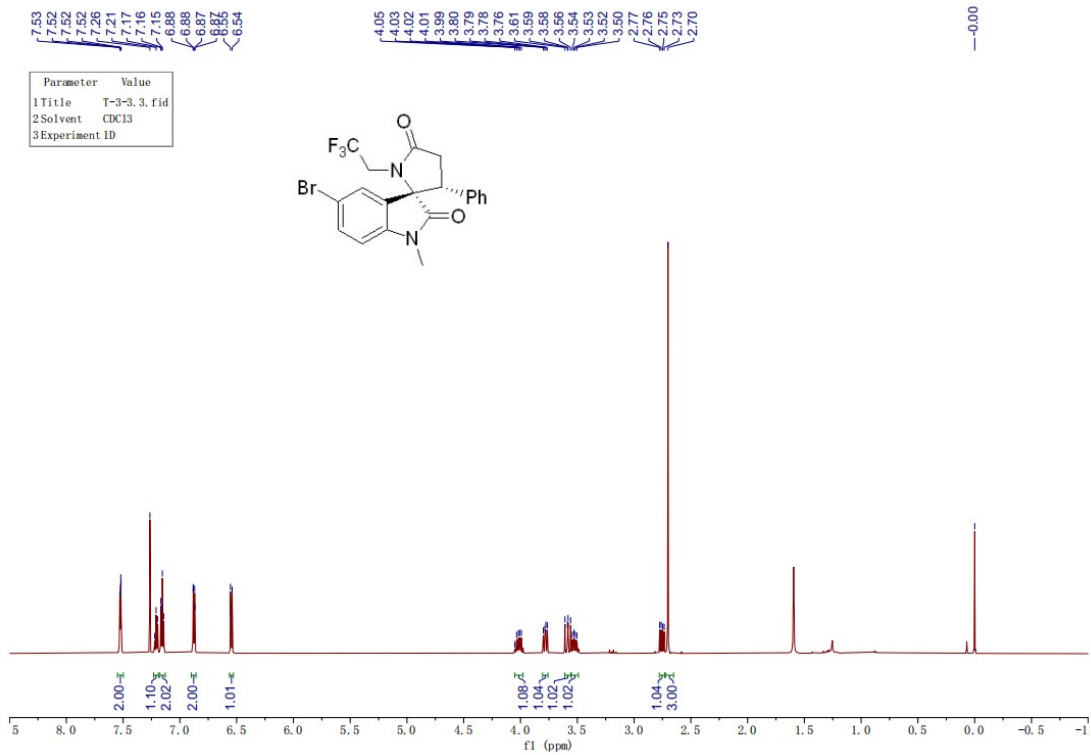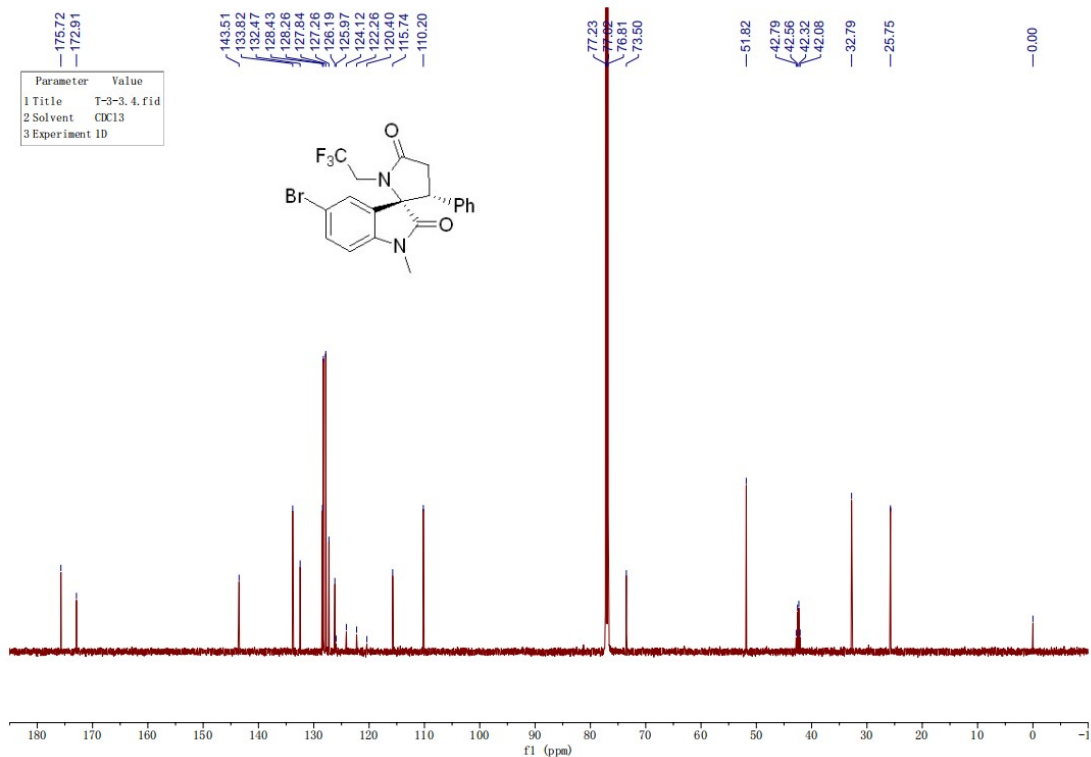

$^1\text{H-NMR}$  and  $^{13}\text{C-NMR}$  of **4d**



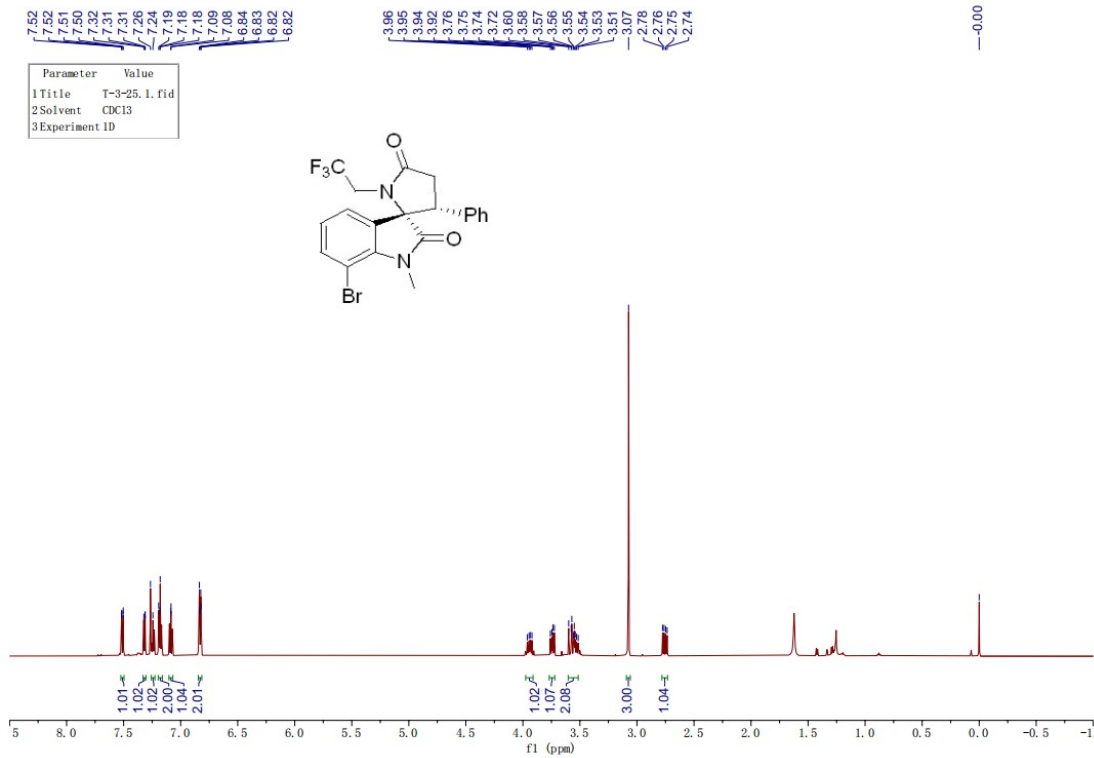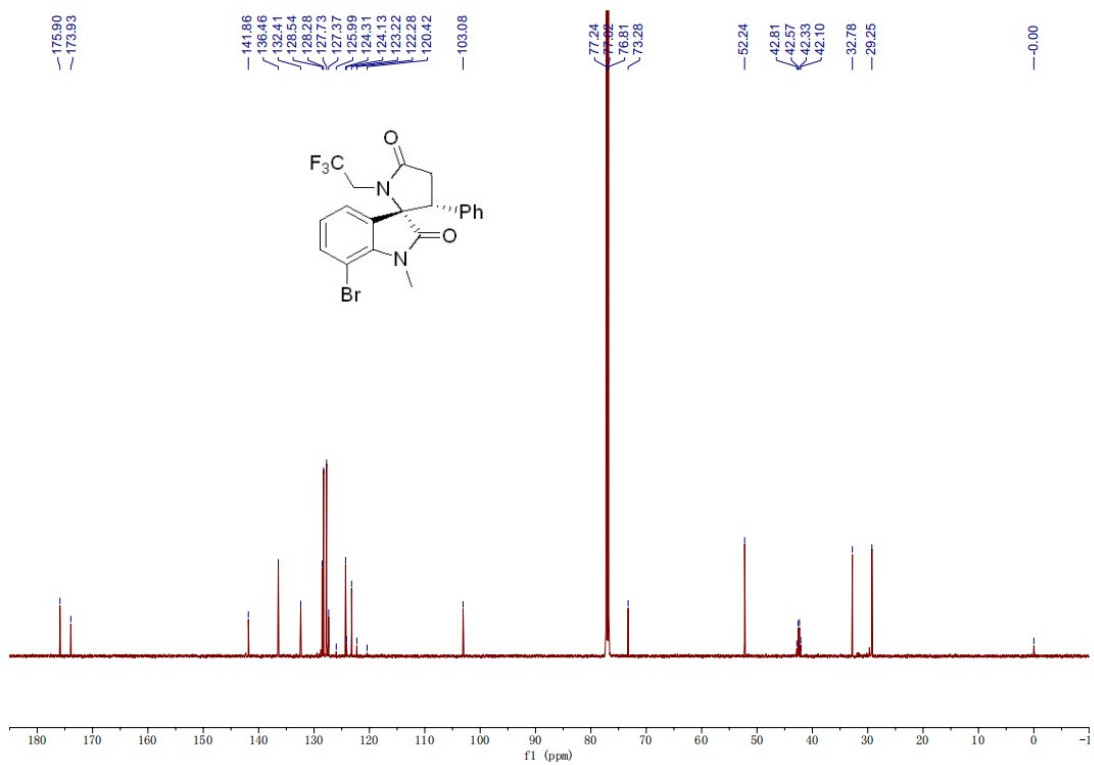

$^1\text{H-NMR}$  and  $^{13}\text{C-NMR}$  of **4e**

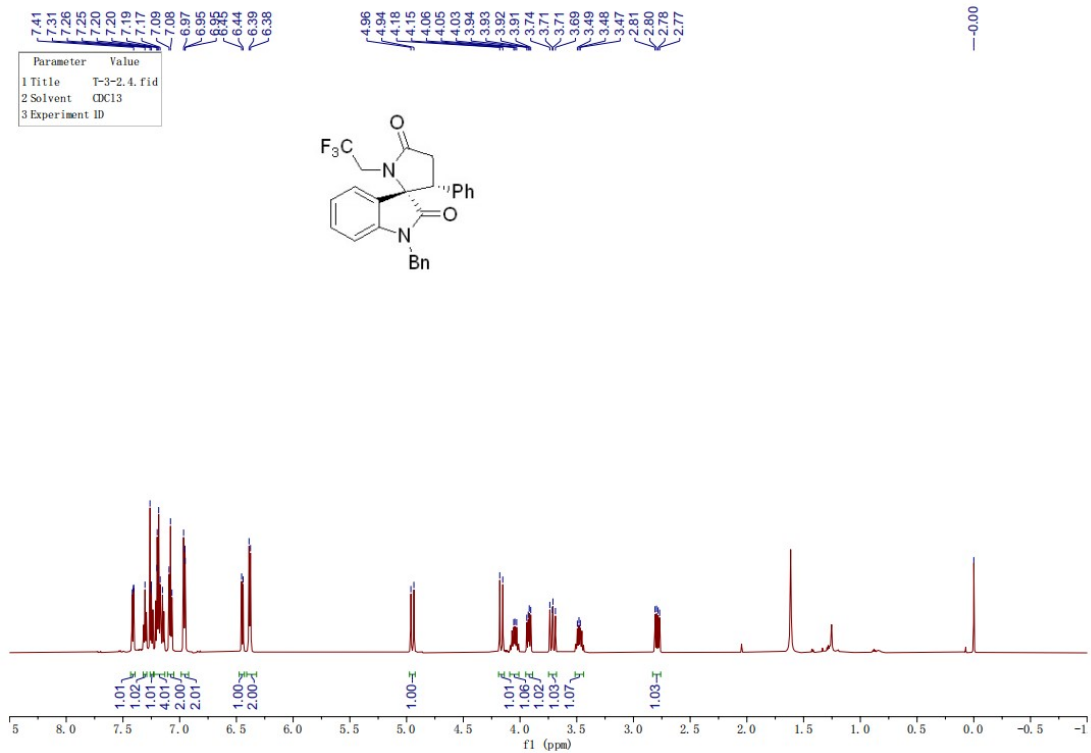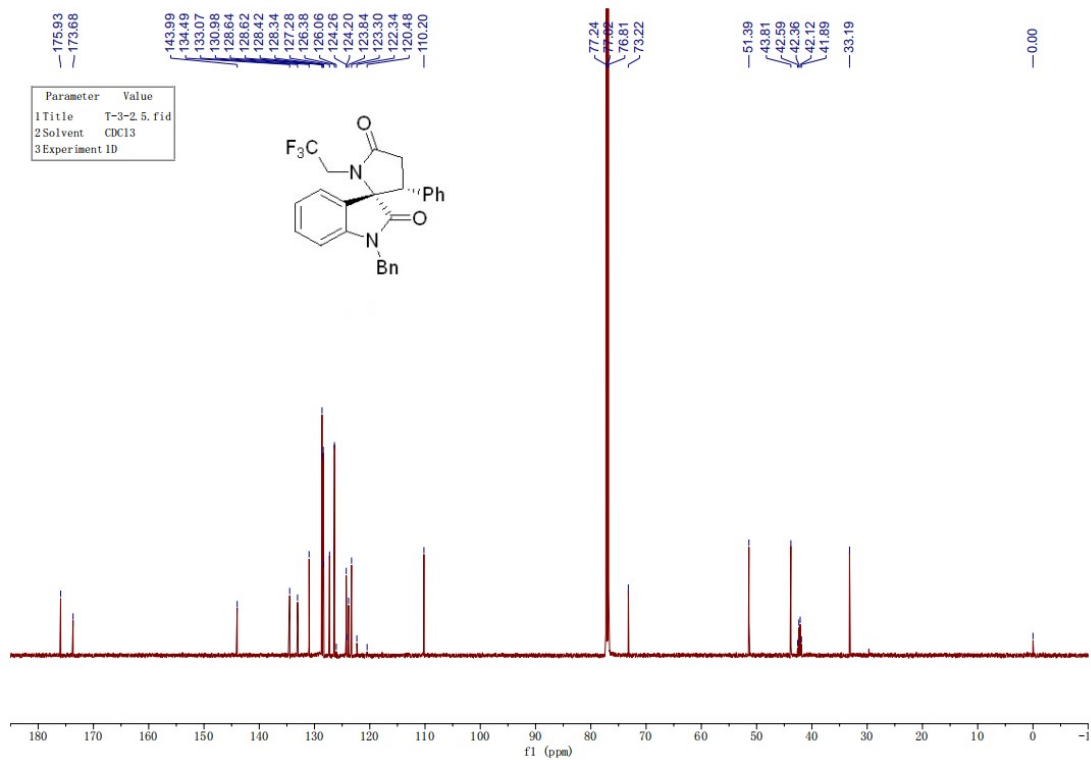

$^1\text{H-NMR}$  and  $^{13}\text{C-NMR}$  of **4f**

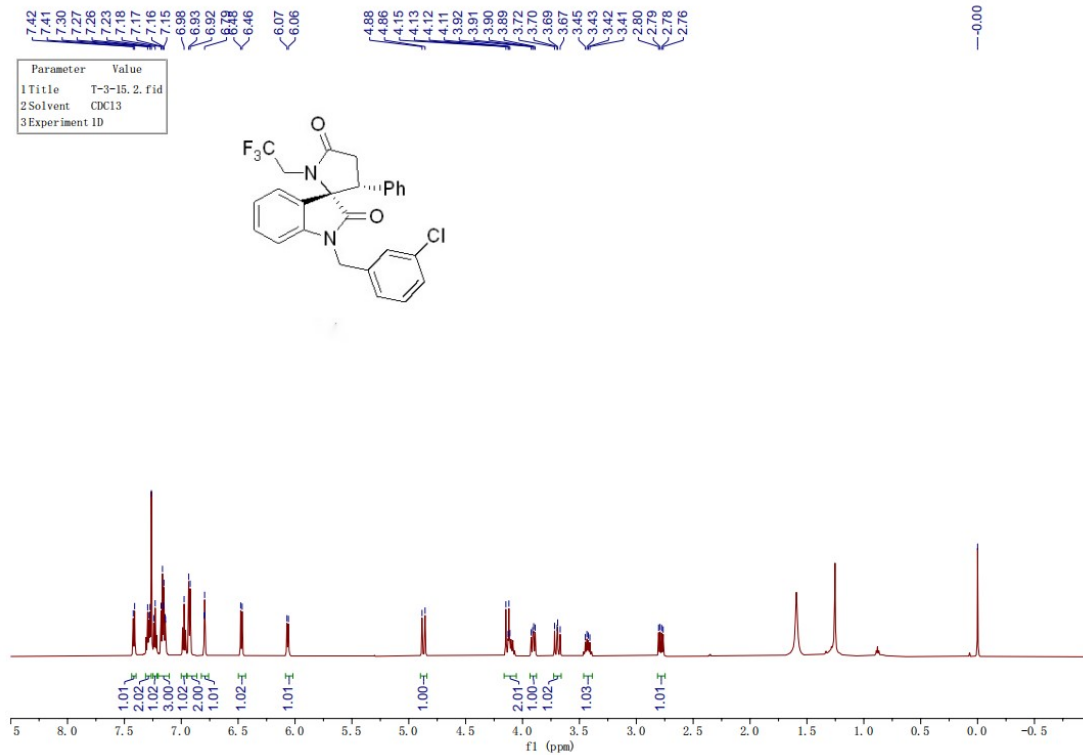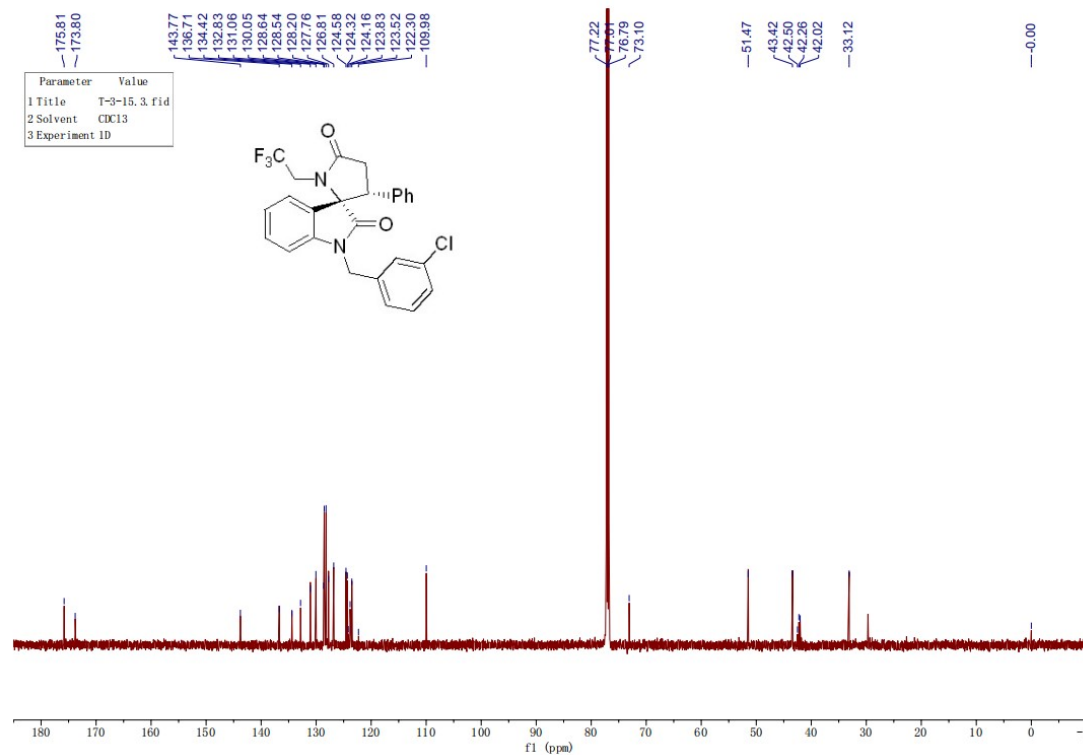

$^1\text{H-NMR}$  and  $^{13}\text{C-NMR}$  of **4g**

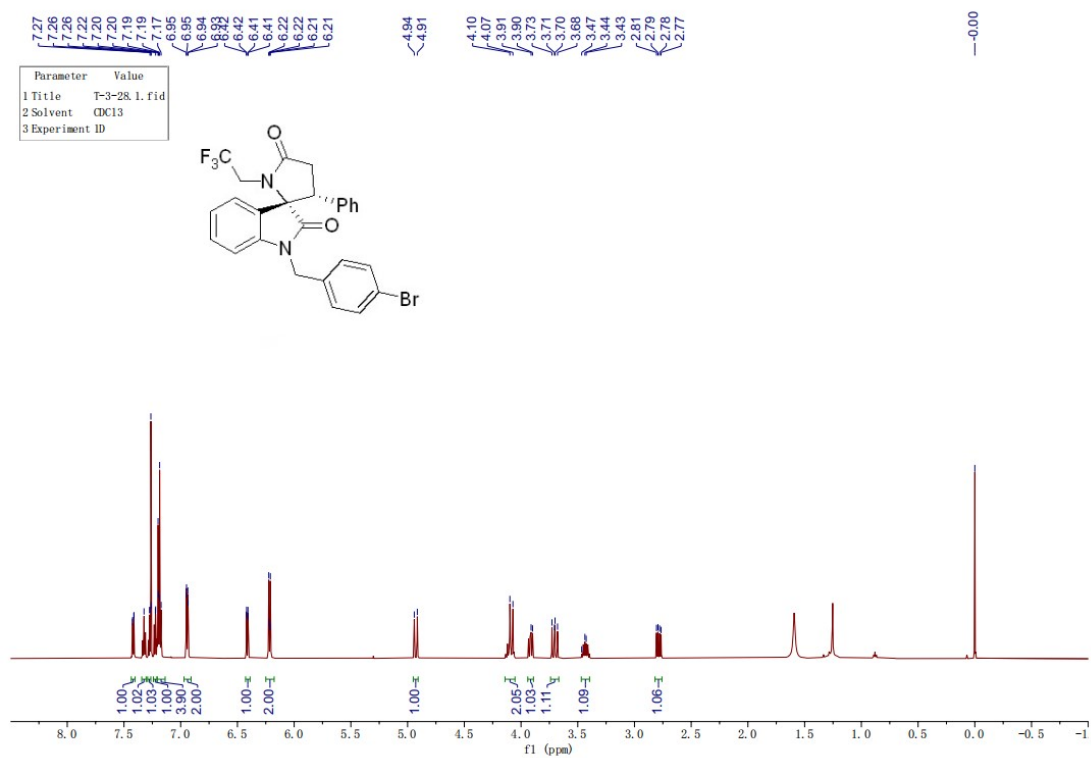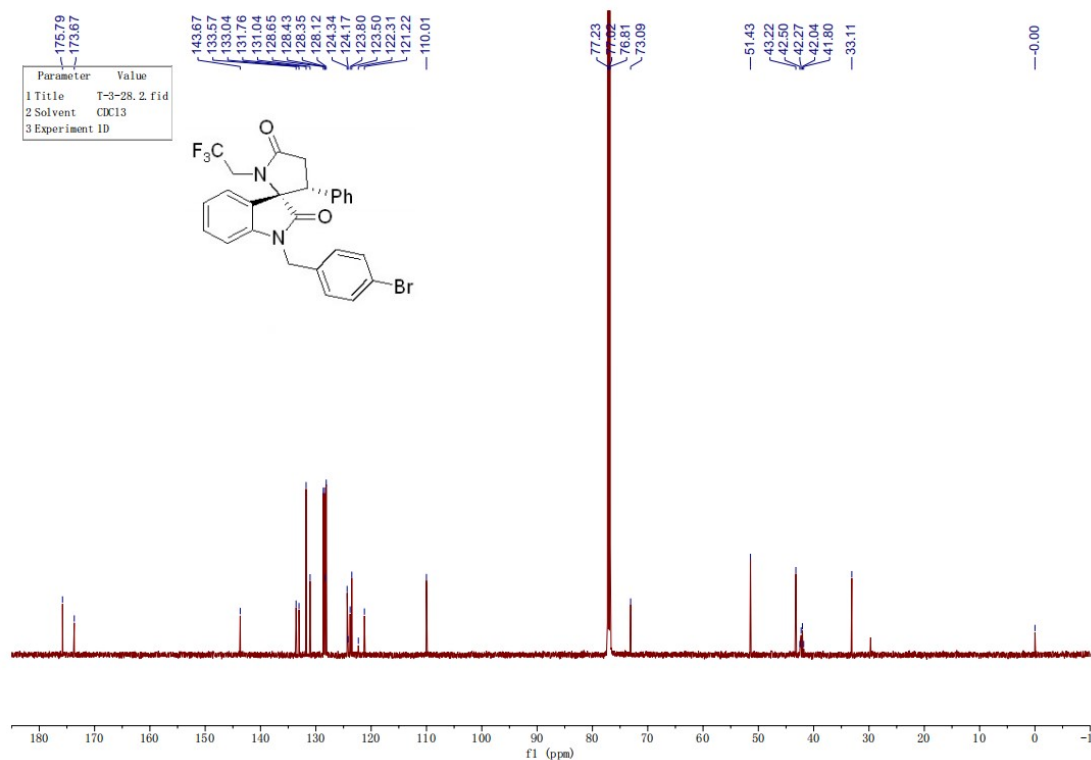

$^1\text{H-NMR}$  and  $^{13}\text{C-NMR}$  of **4h**

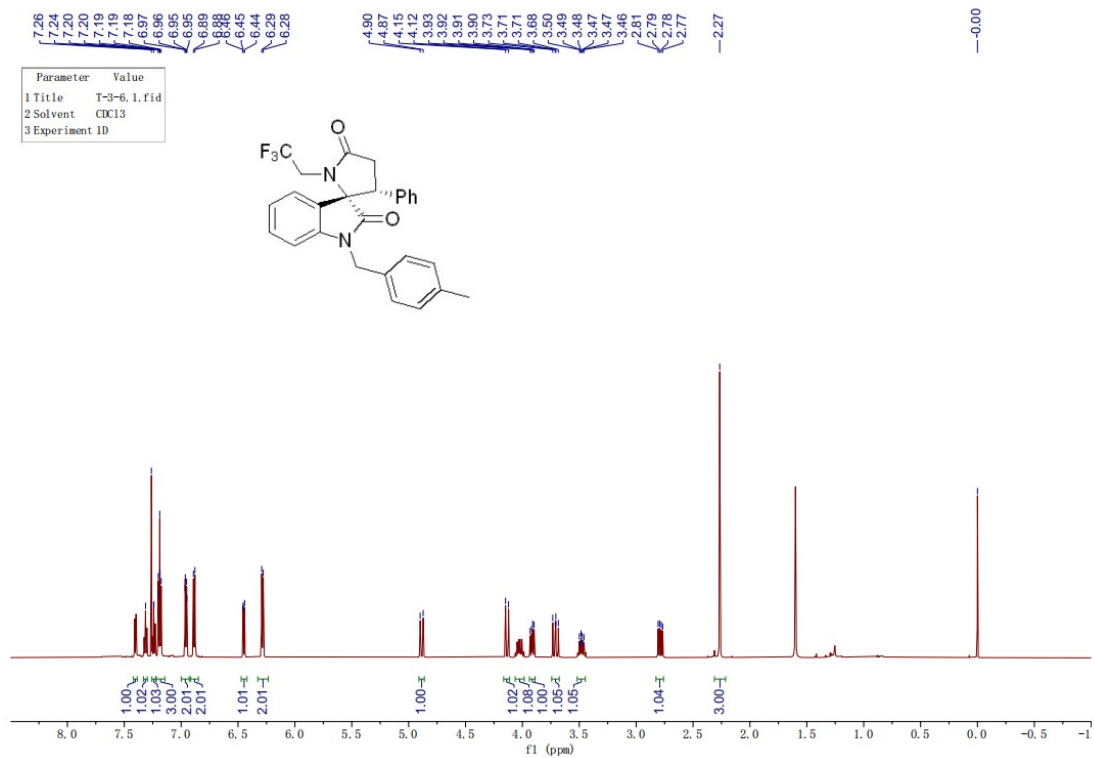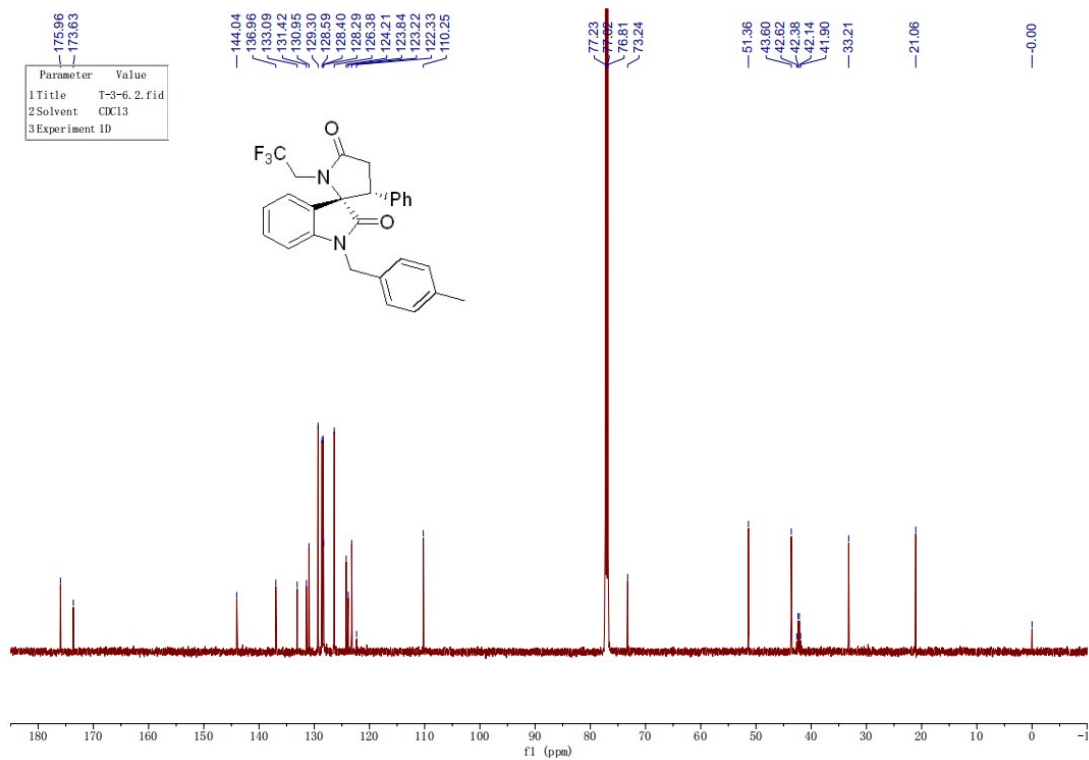

$^1\text{H-NMR}$  and  $^{13}\text{C-NMR}$  of **4i**

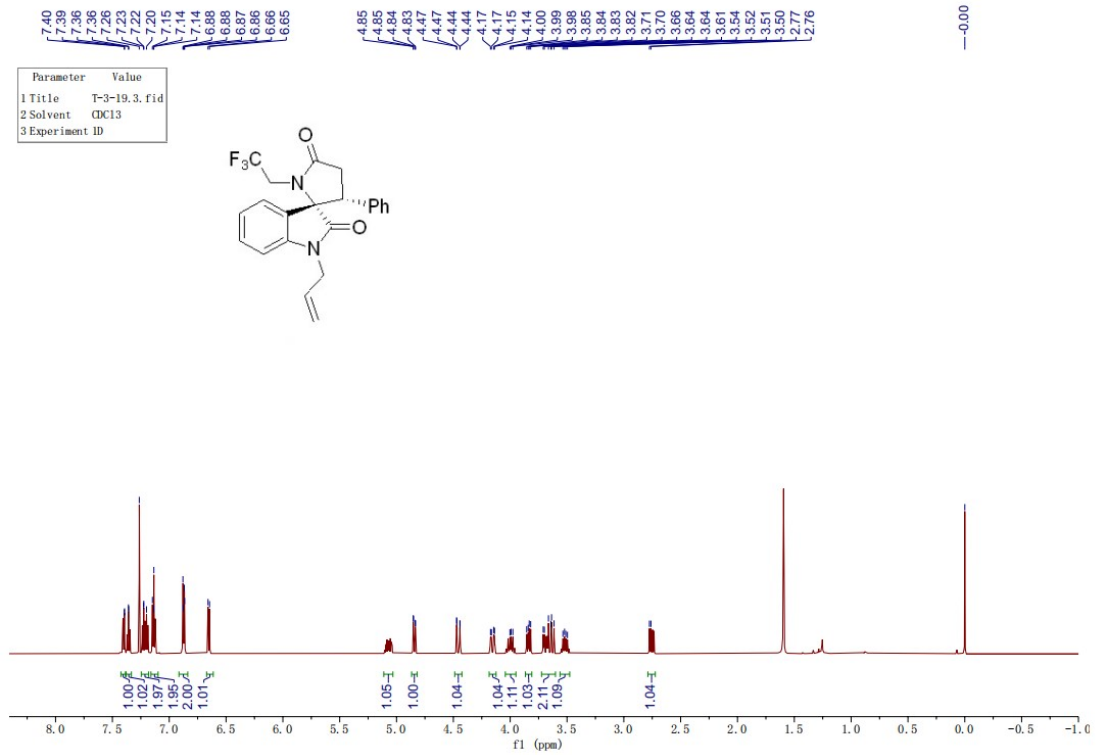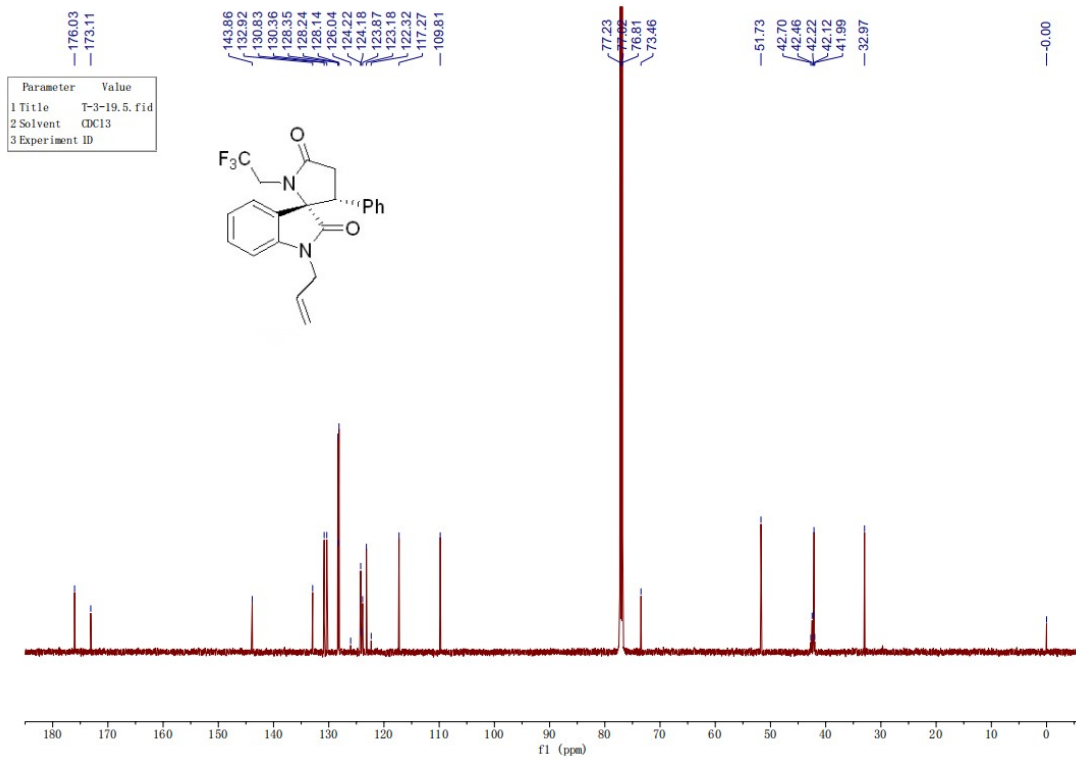

$^1\text{H-NMR}$  and  $^{13}\text{C-NMR}$  of **4j**

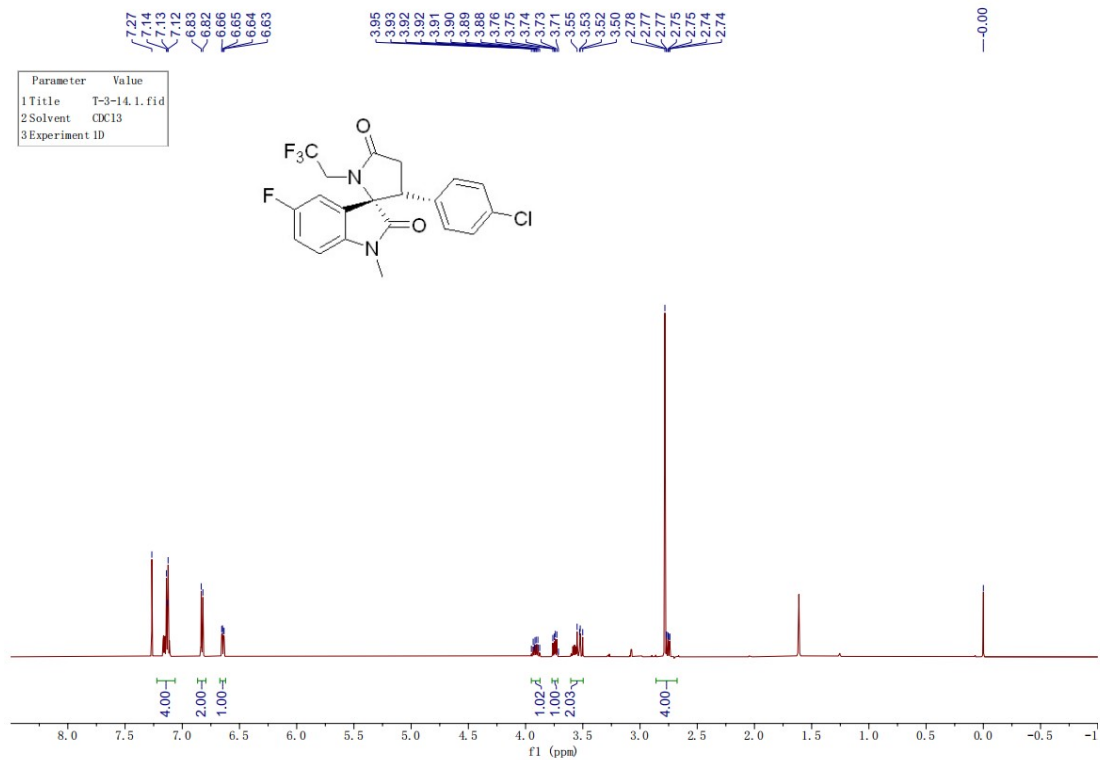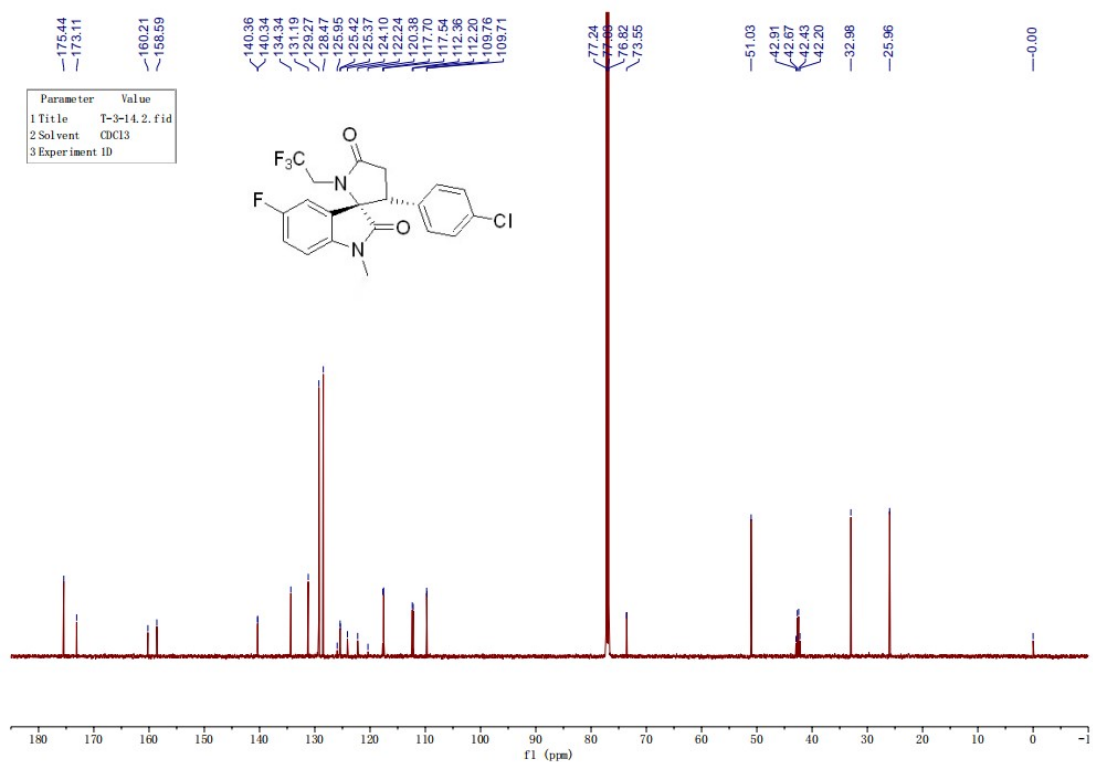

$^1\text{H-NMR}$  and  $^{13}\text{C-NMR}$  of **4k**

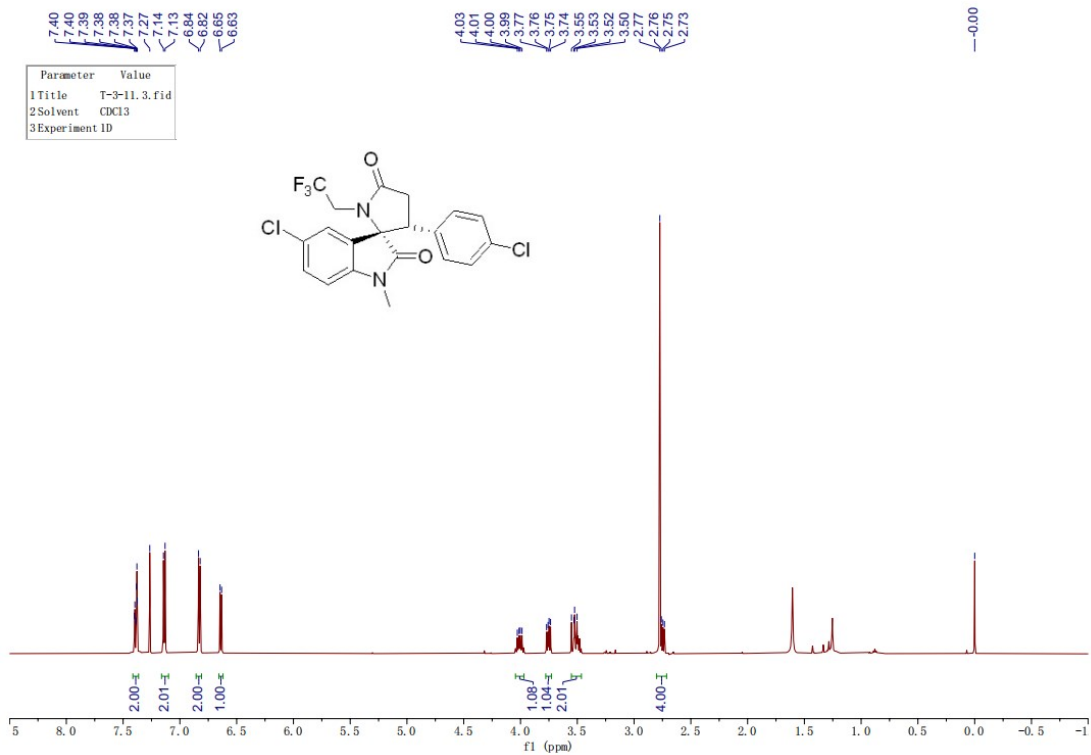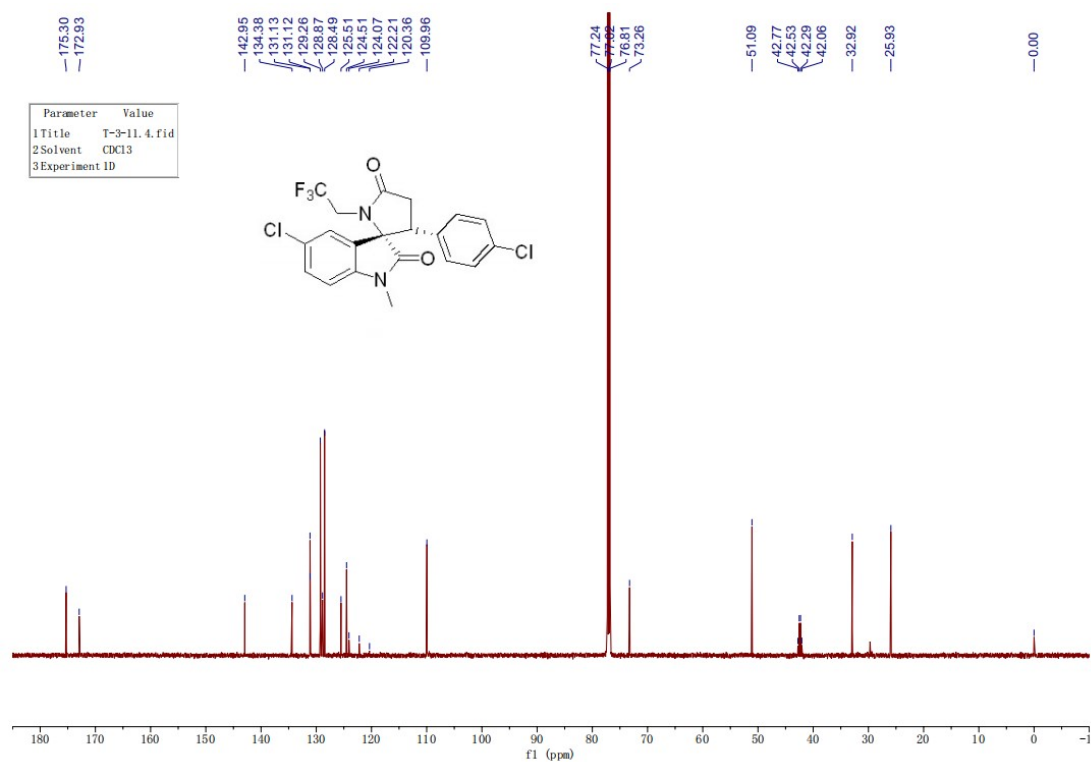

$^1\text{H-NMR}$  and  $^{13}\text{C-NMR}$  of **4I**



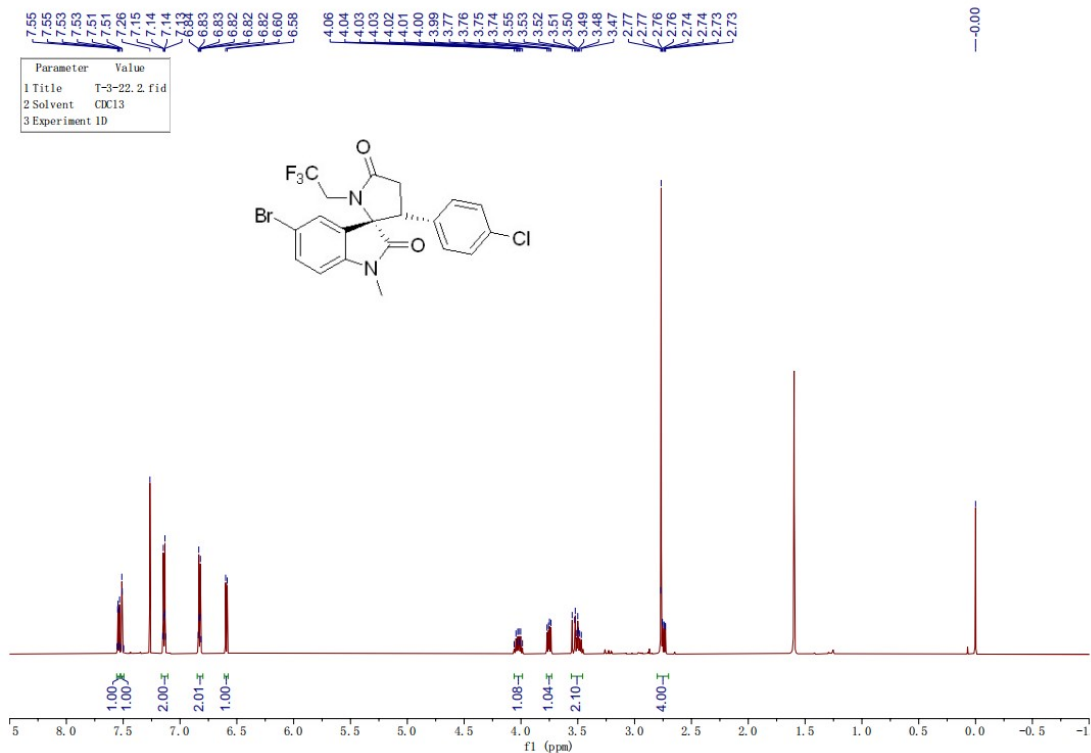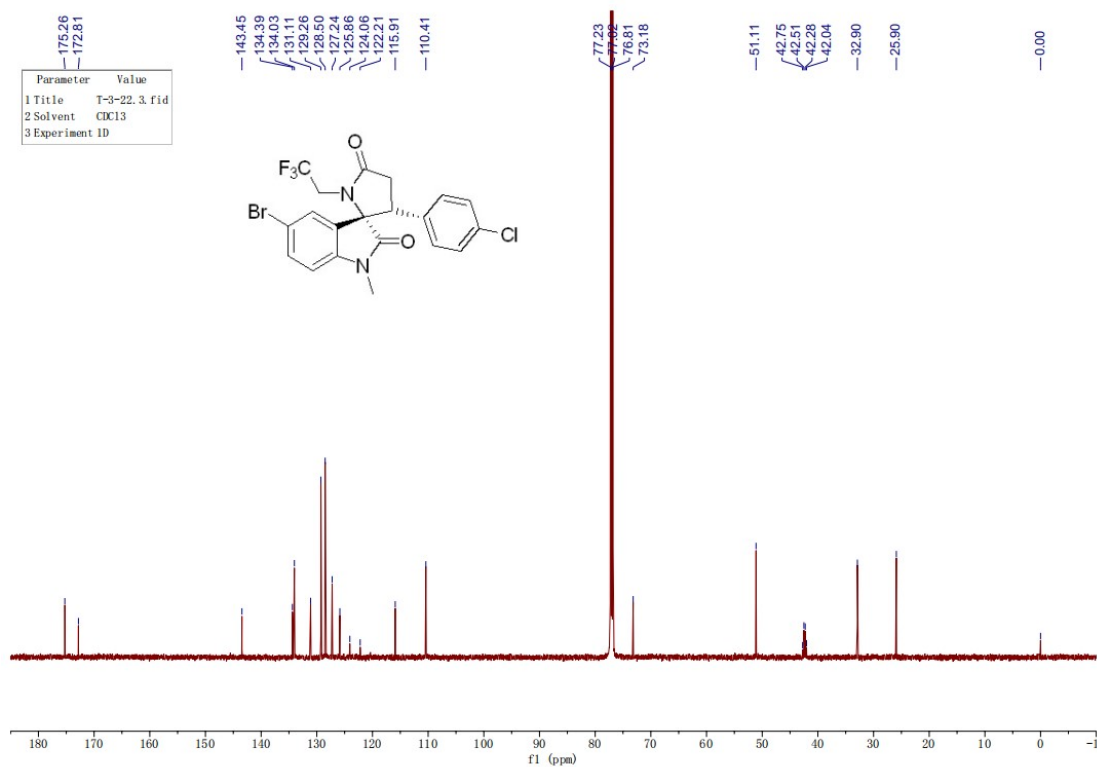

$^1\text{H-NMR}$  and  $^{13}\text{C-NMR}$  of **4m**

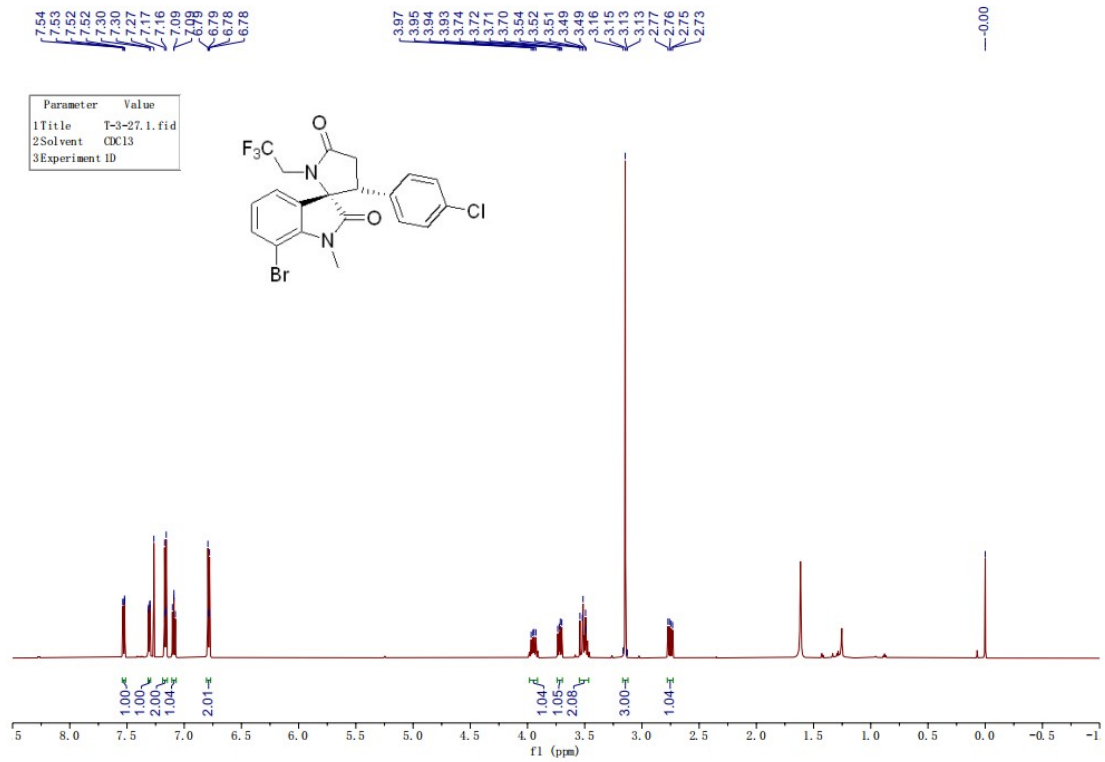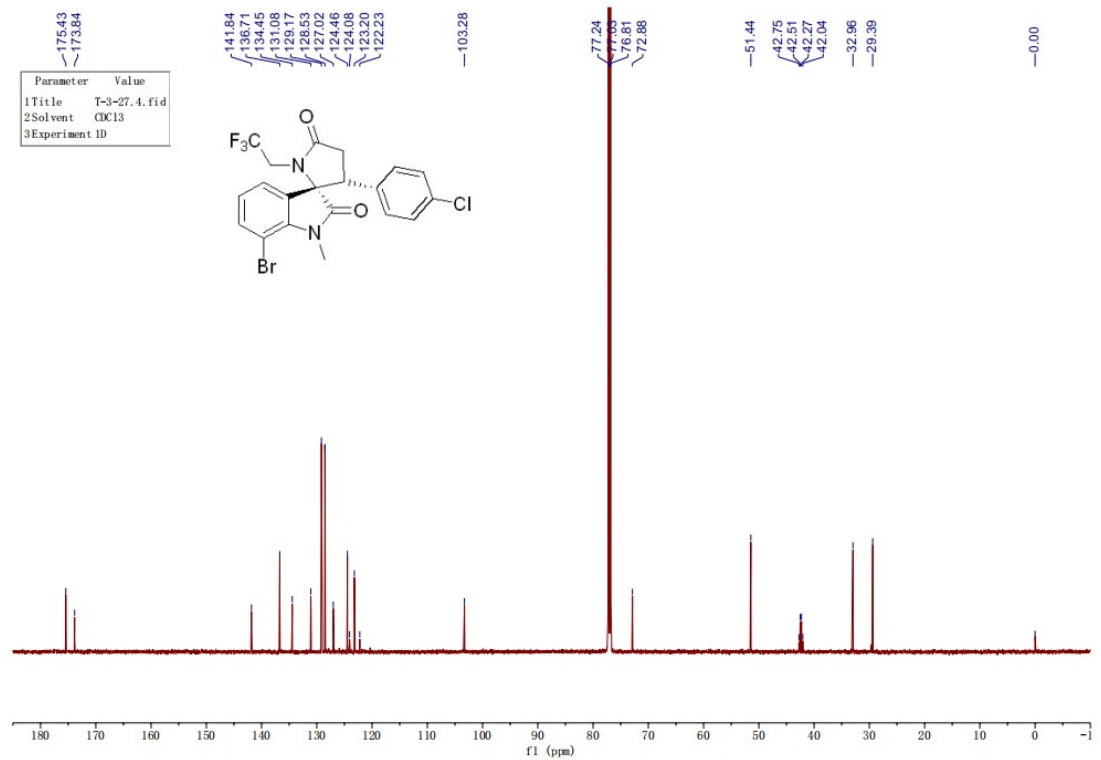

$^1\text{H-NMR}$  and  $^{13}\text{C-NMR}$  of **4n**

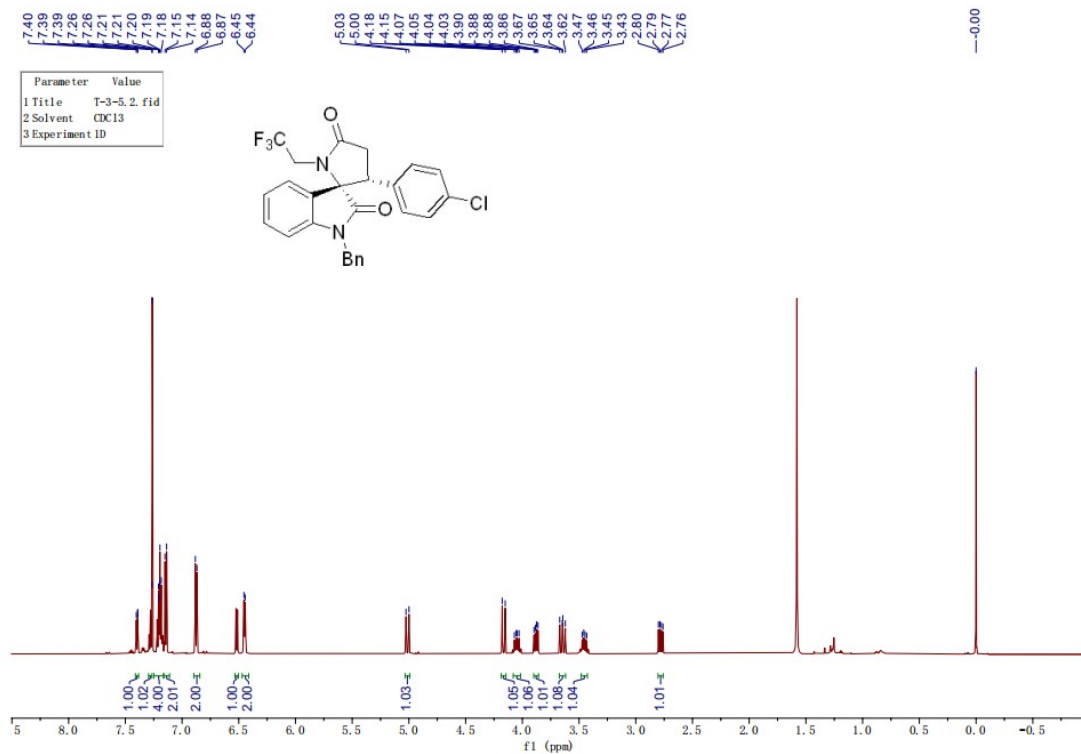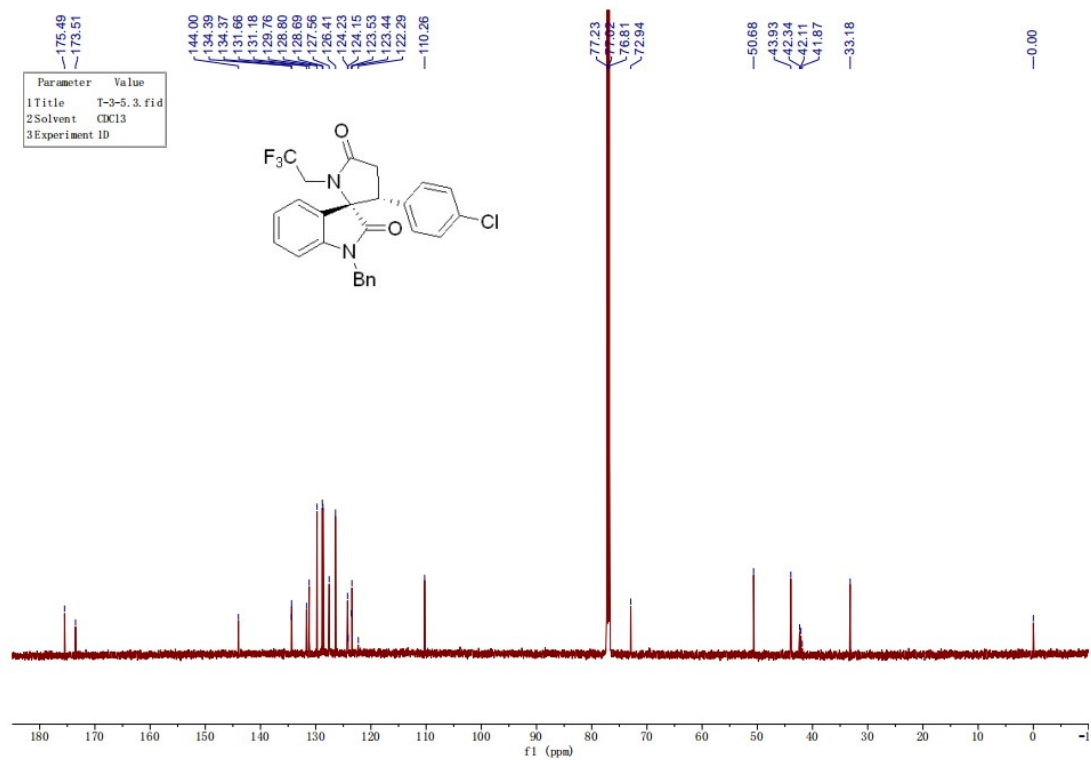

$^1\text{H-NMR}$  and  $^{13}\text{C-NMR}$  of **4o**

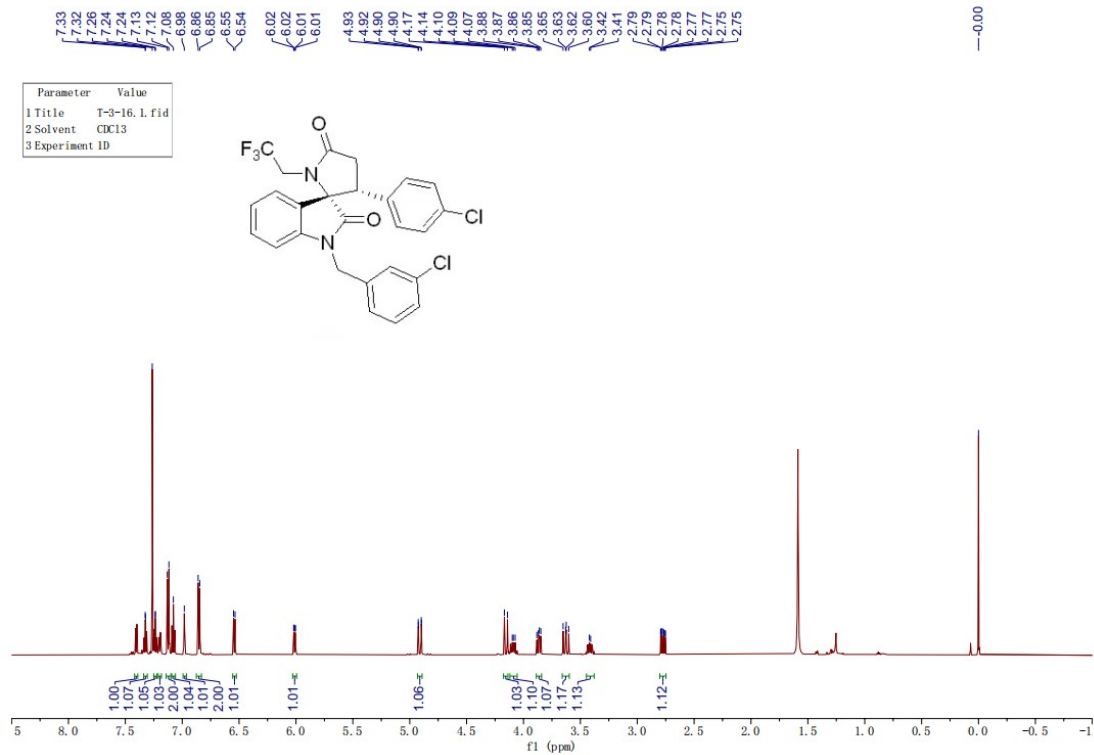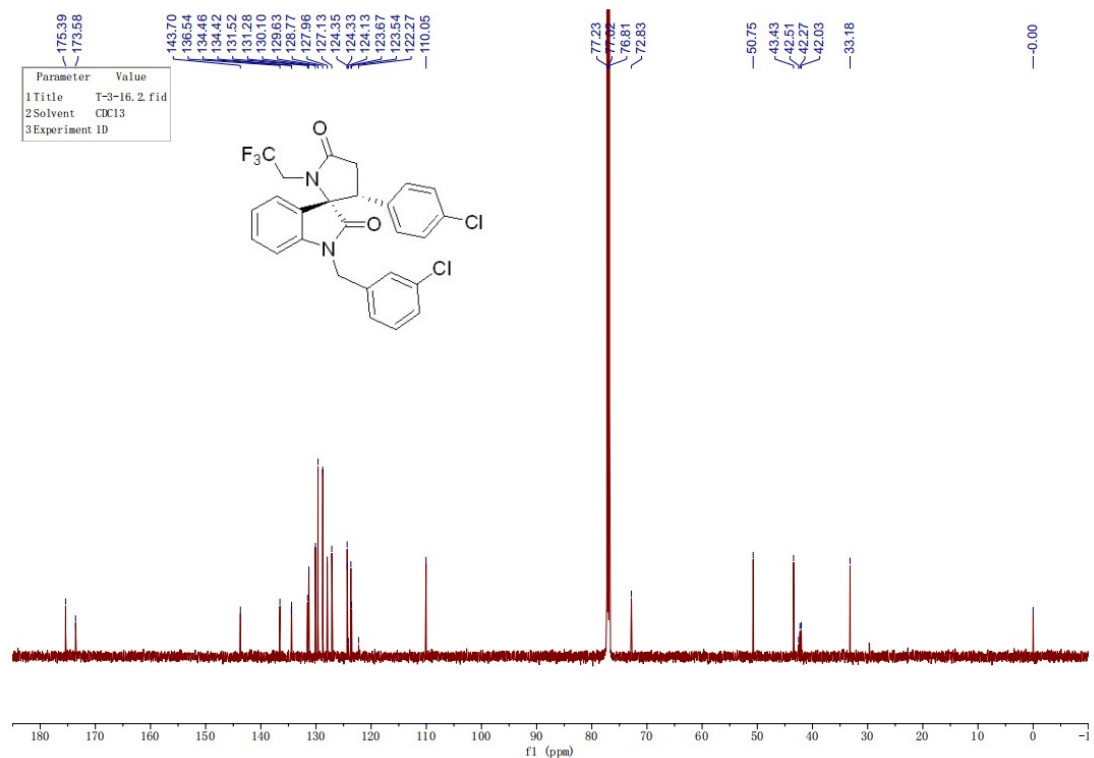

$^1\text{H-NMR}$  and  $^{13}\text{C-NMR}$  of **4p**

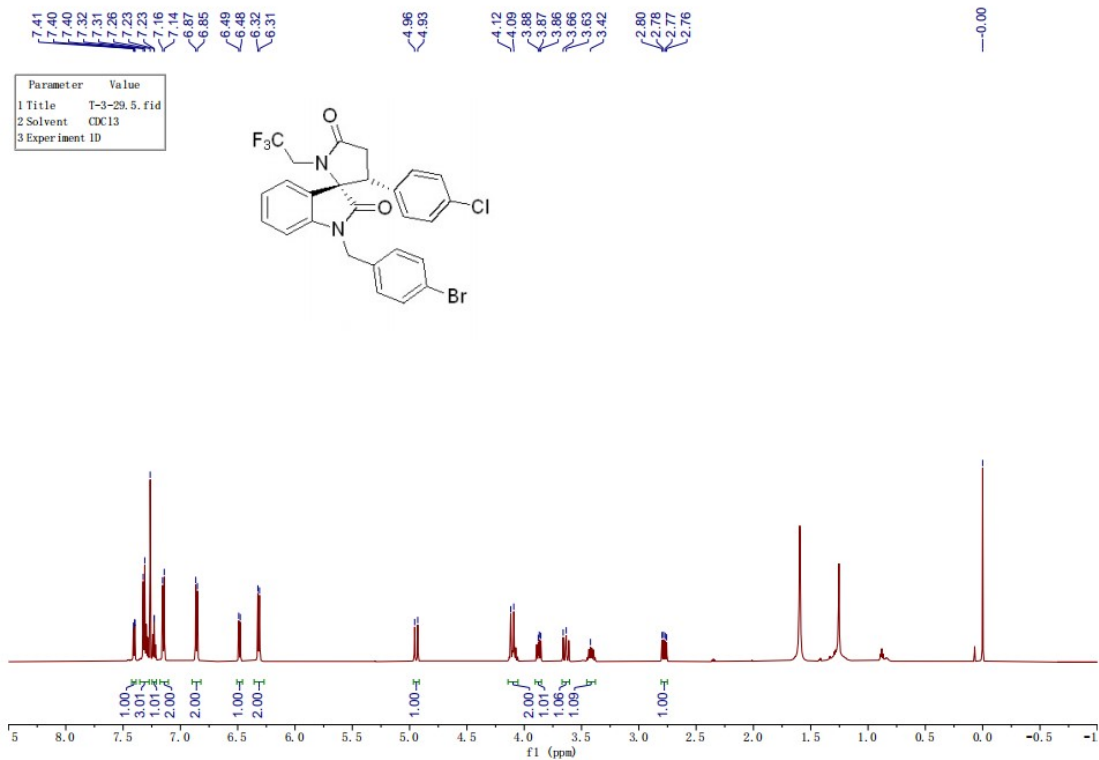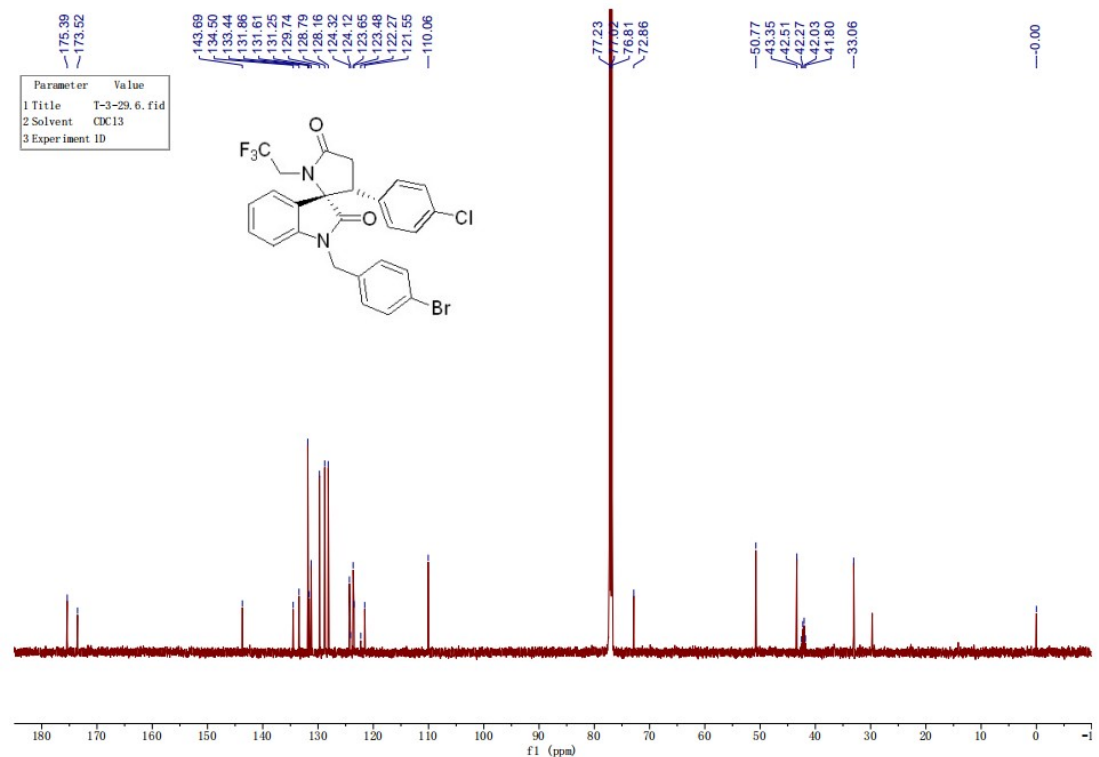

$^1\text{H-NMR}$  and  $^{13}\text{C-NMR}$  of **4q**

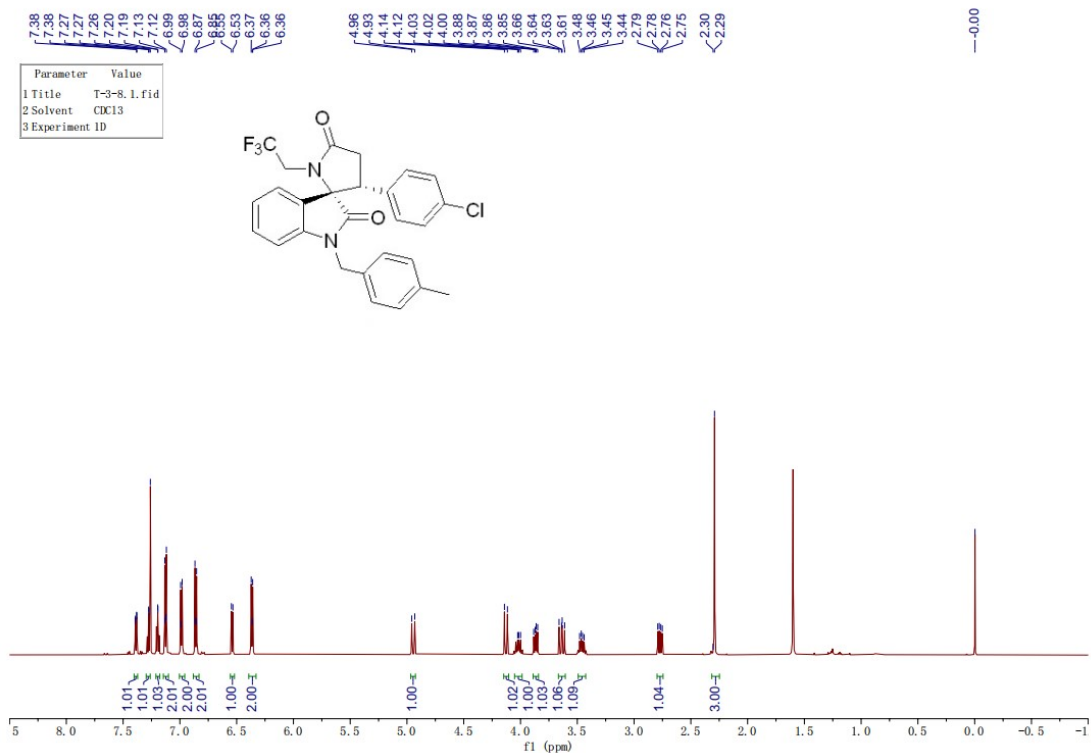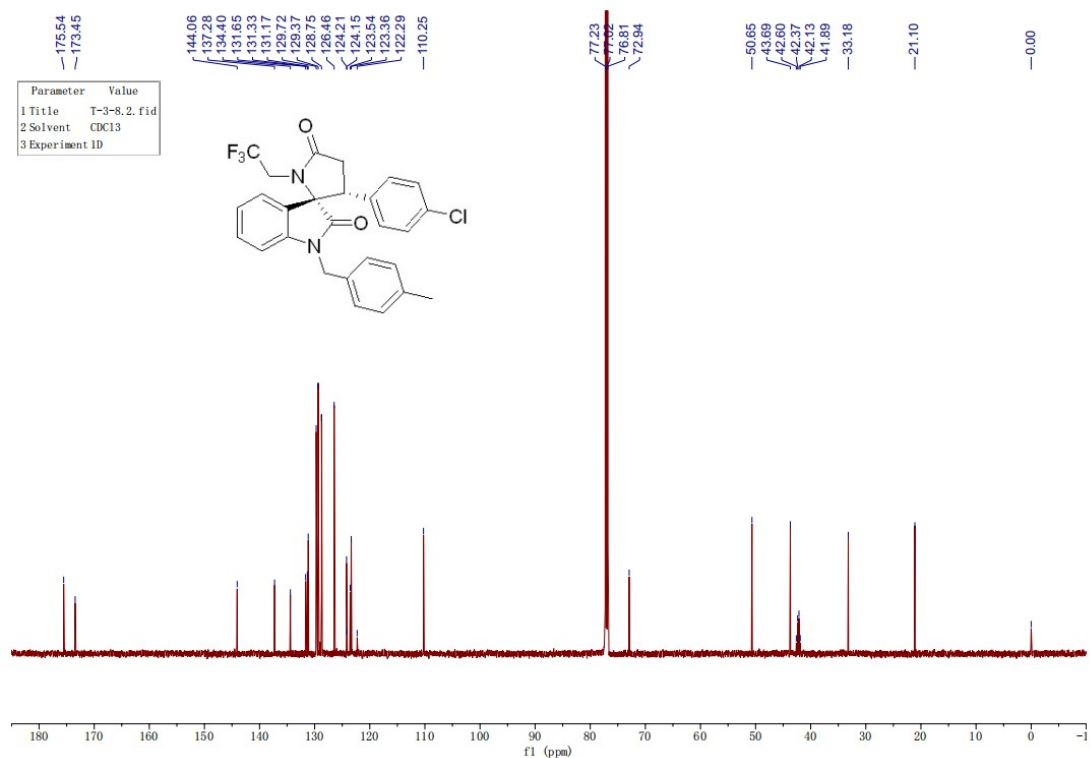

$^1\text{H-NMR}$  and  $^{13}\text{C-NMR}$  of **4r**

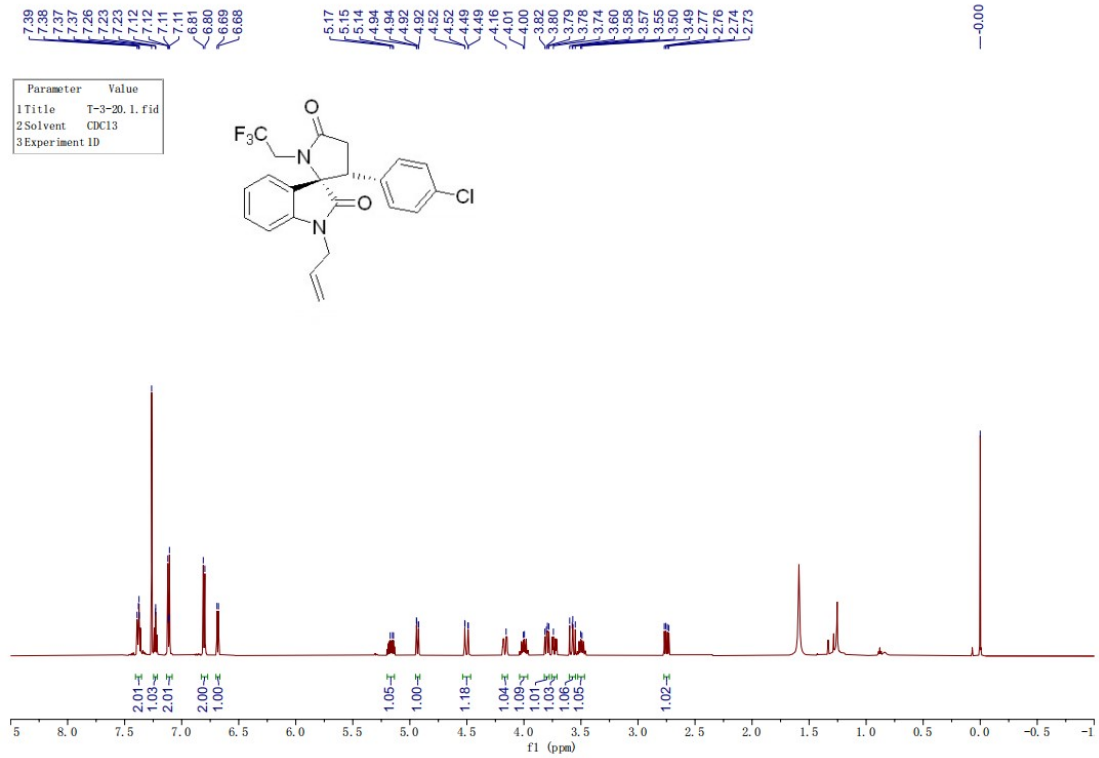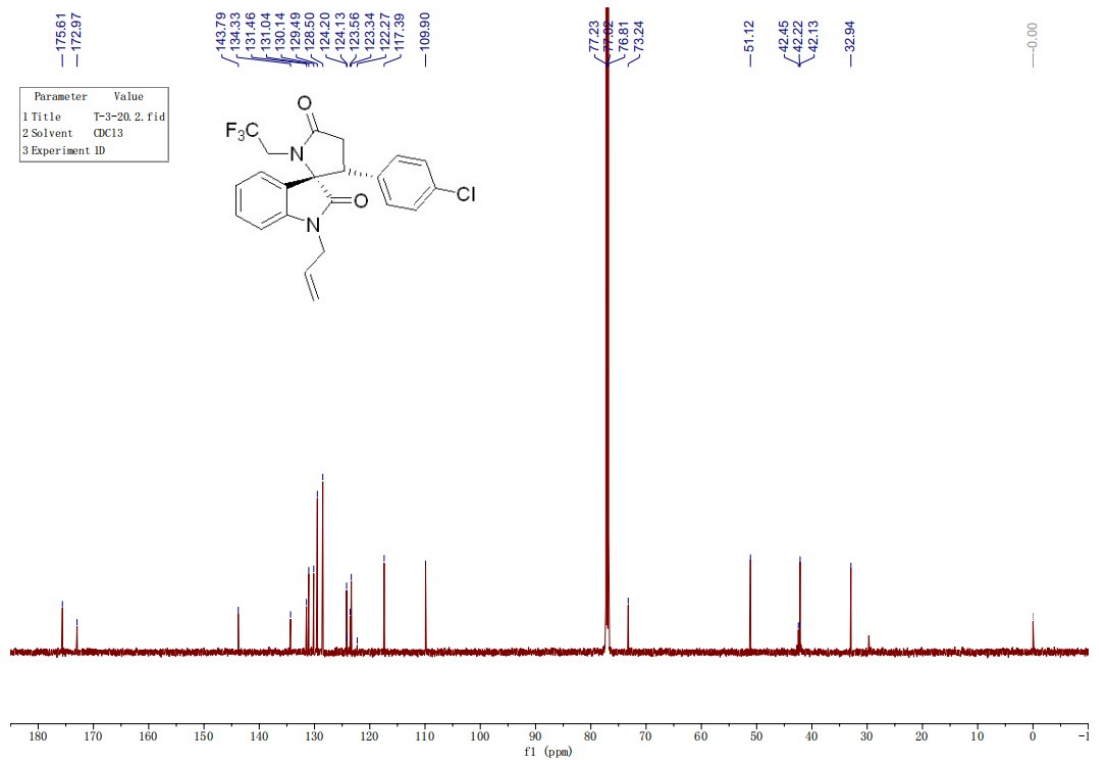

$^1\text{H-NMR}$  and  $^{13}\text{C-NMR}$  of **4s**

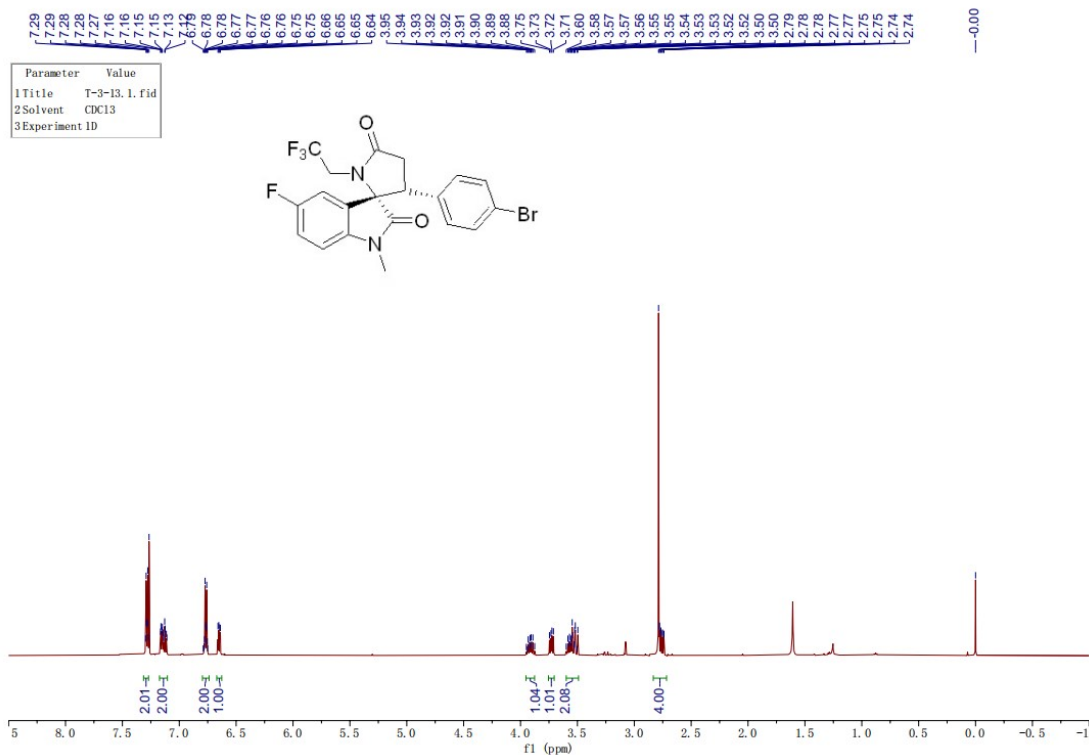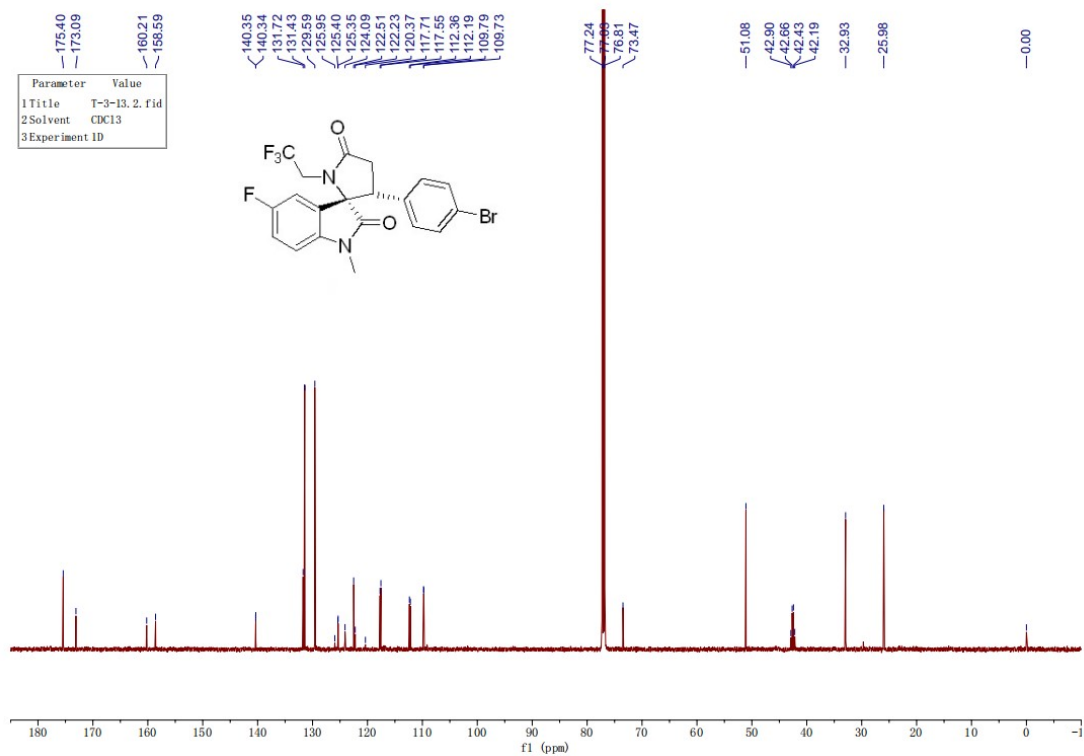

$^1\text{H-NMR}$  and  $^{13}\text{C-NMR}$  of **4t**



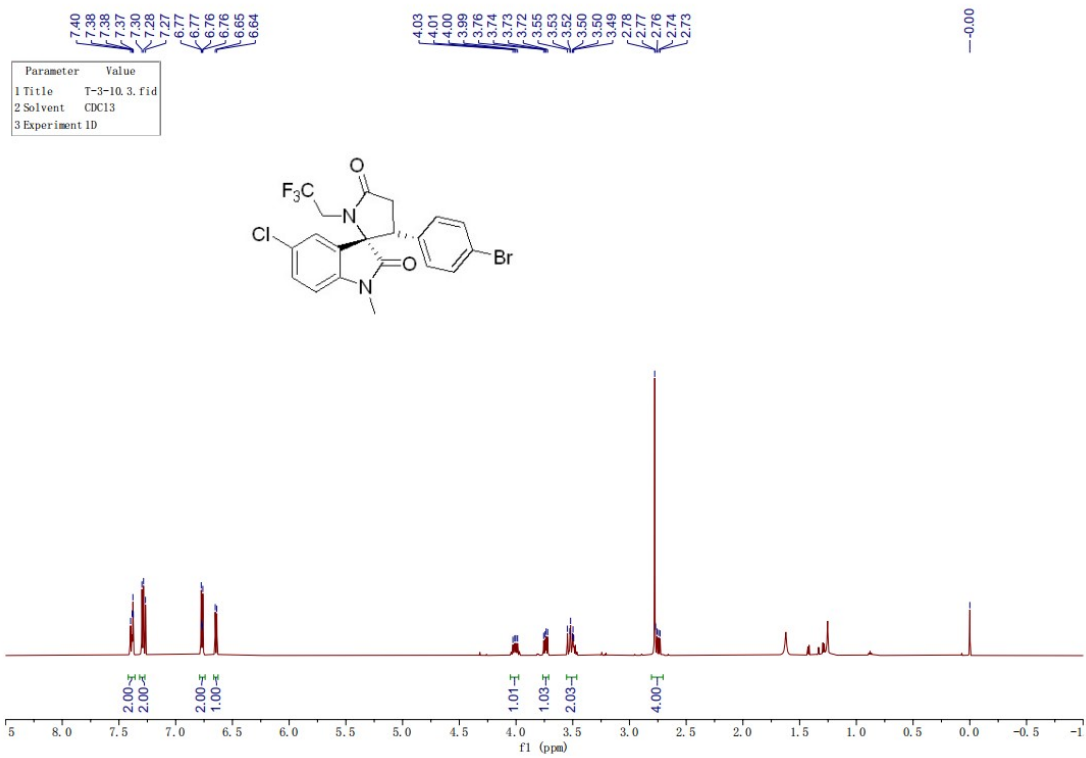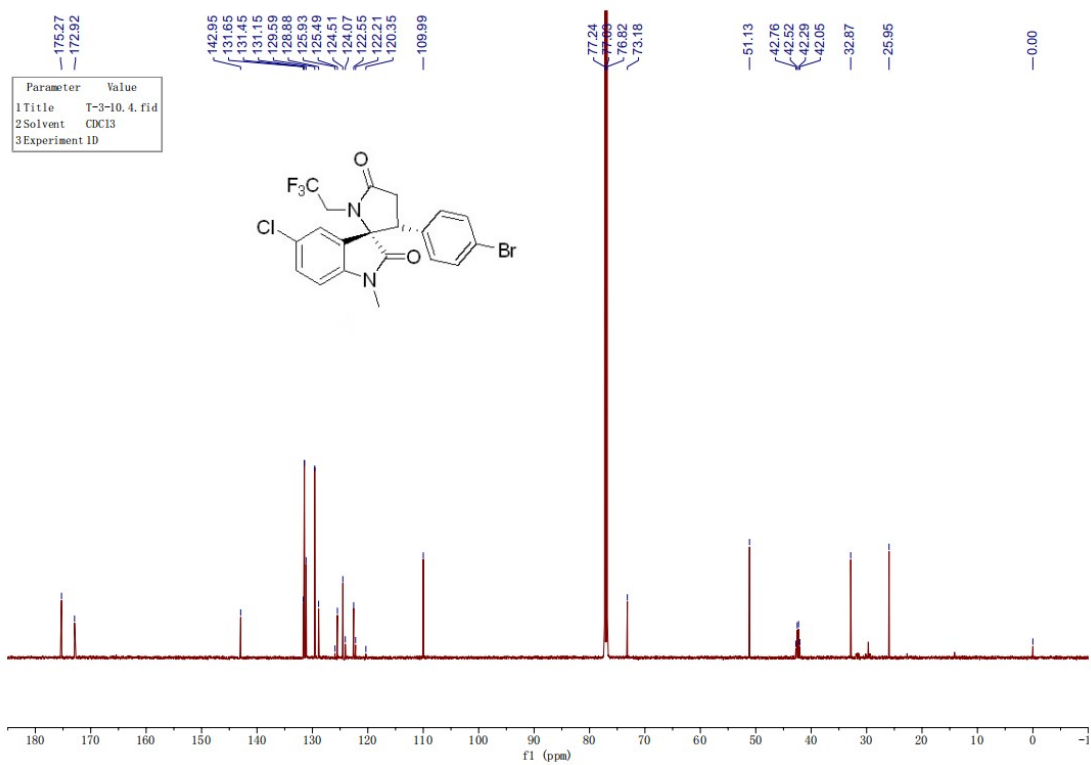

$^1\text{H-NMR}$  and  $^{13}\text{C-NMR}$  of **4u**

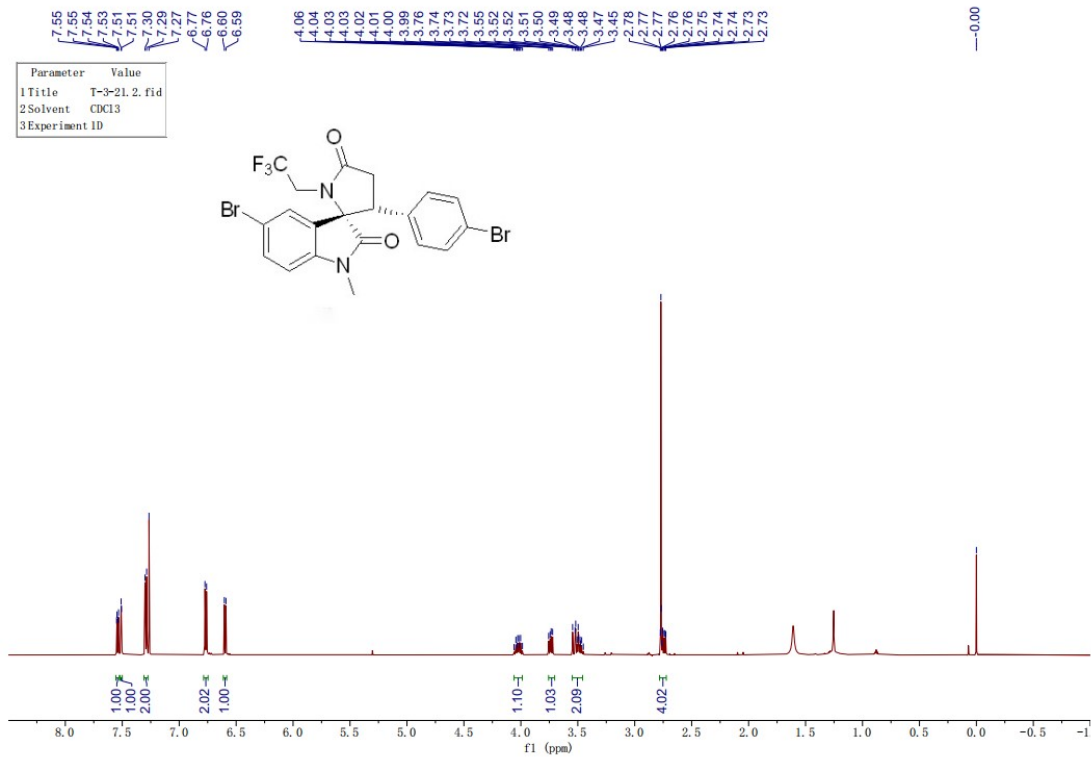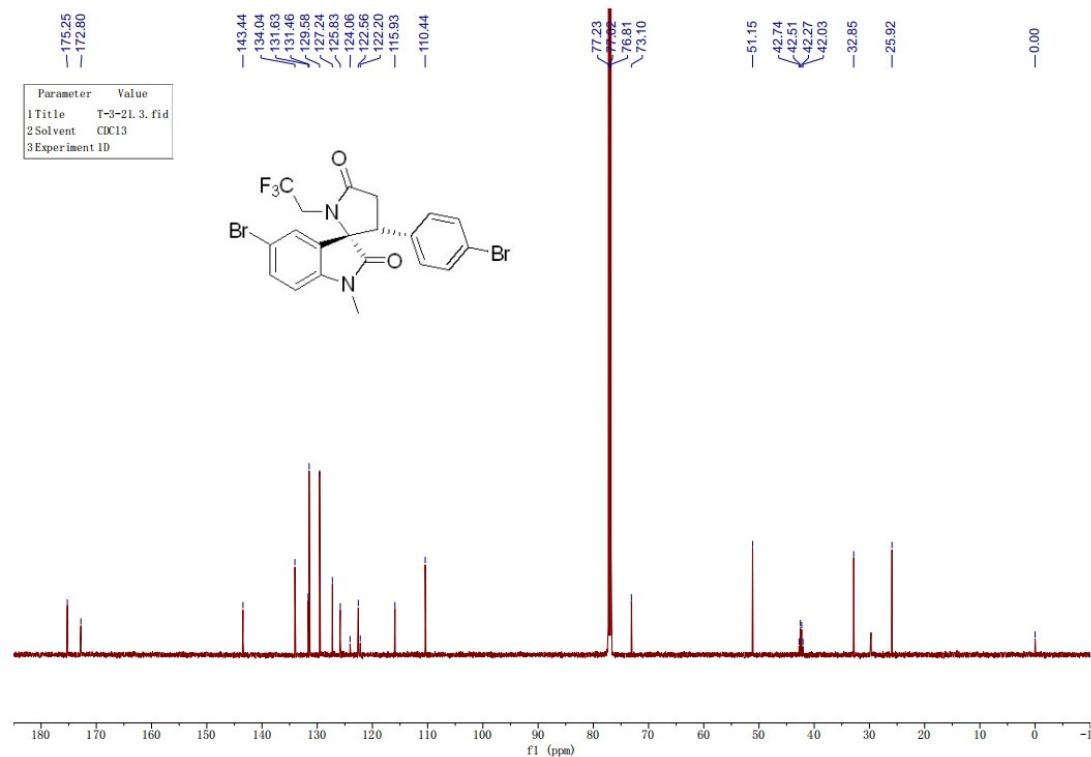

$^1\text{H-NMR}$  and  $^{13}\text{C-NMR}$  of **4v**

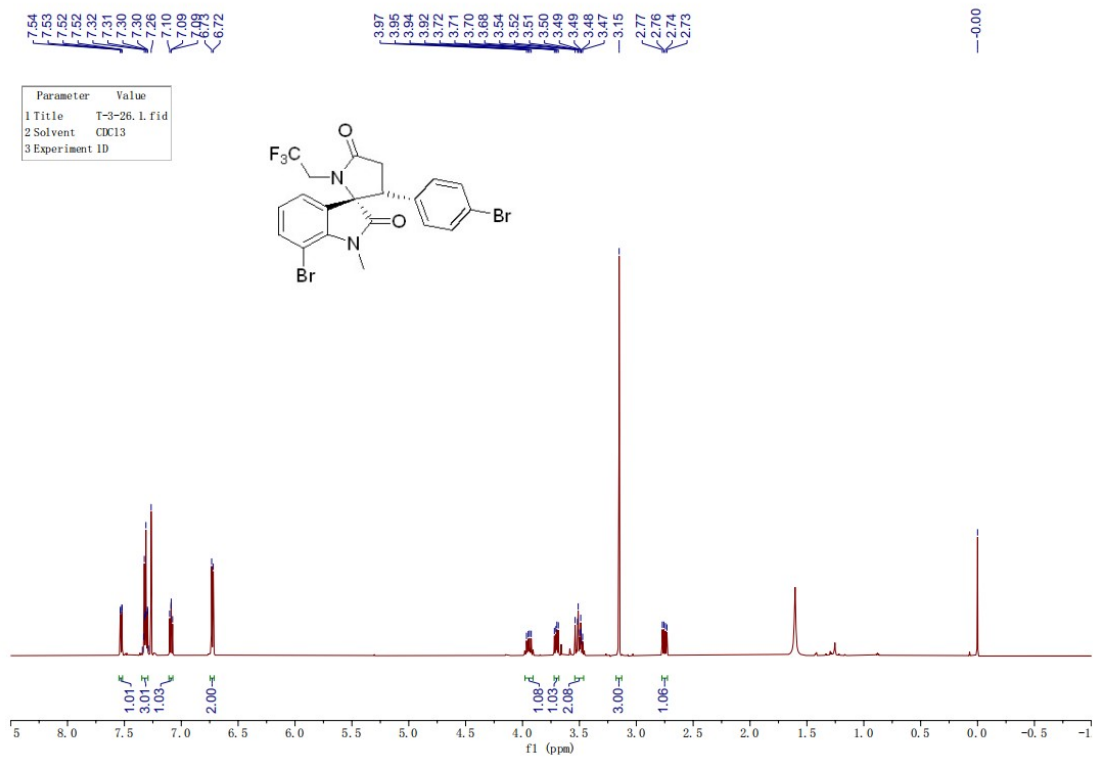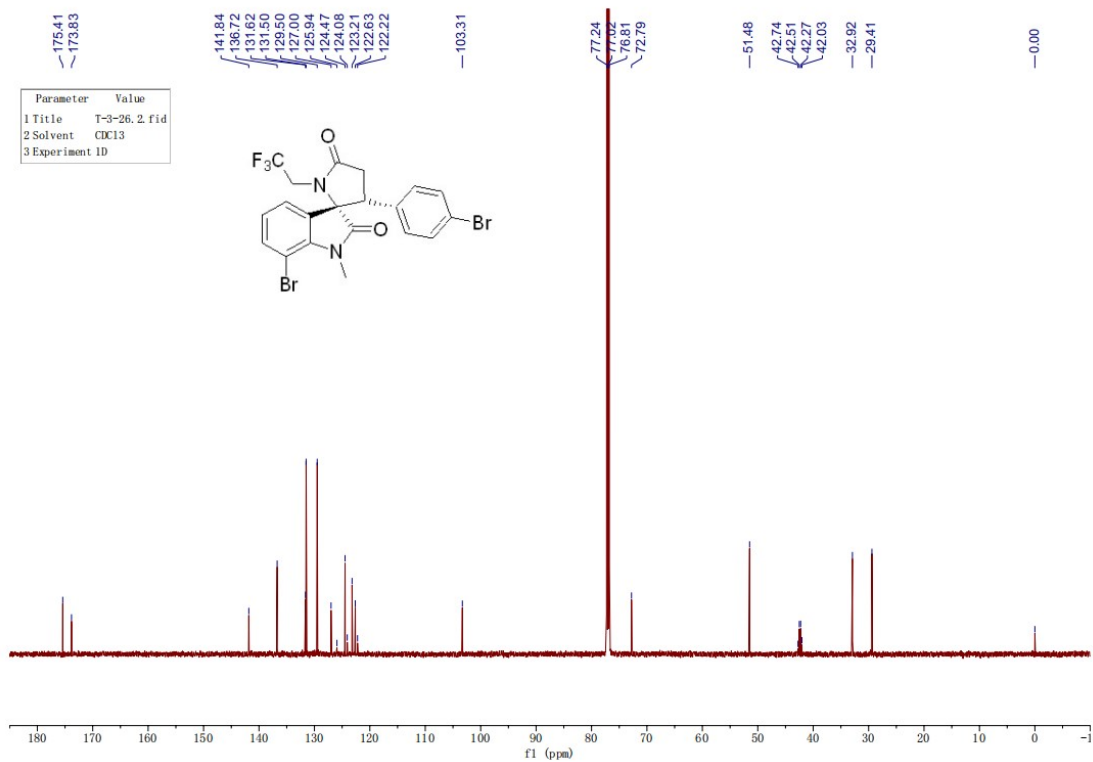

$^1\text{H-NMR}$  and  $^{13}\text{C-NMR}$  of 4w

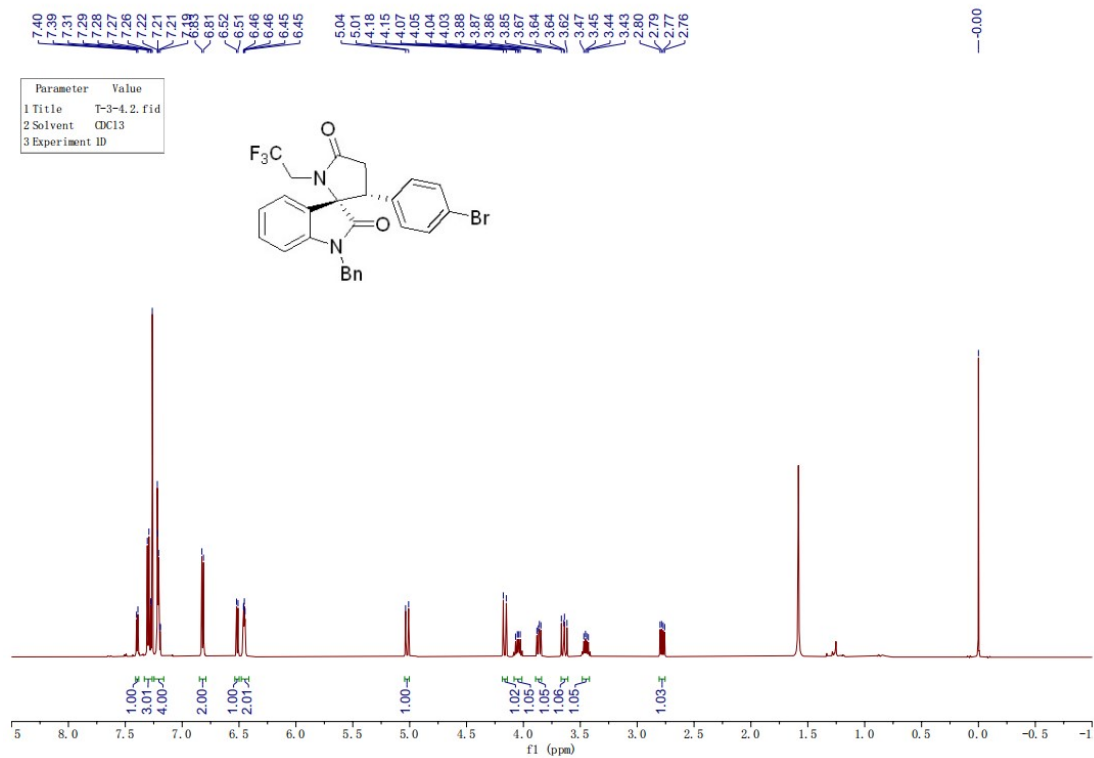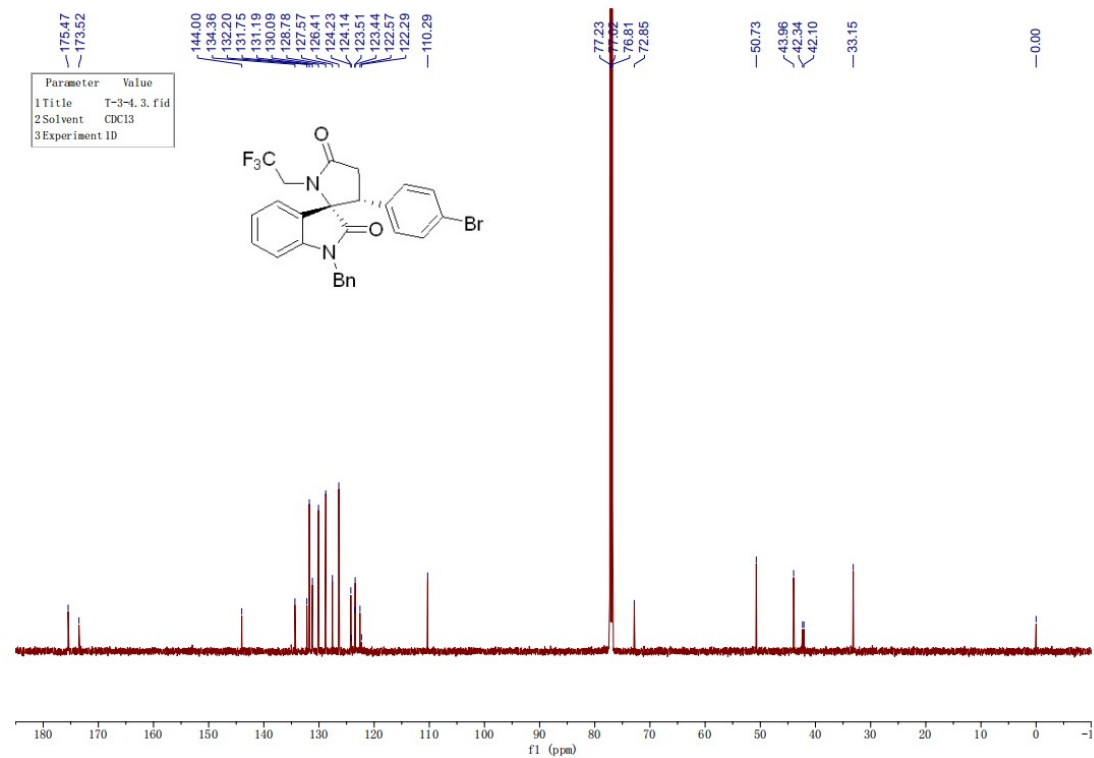

$^1\text{H-NMR}$  and  $^{13}\text{C-NMR}$  of **4x**





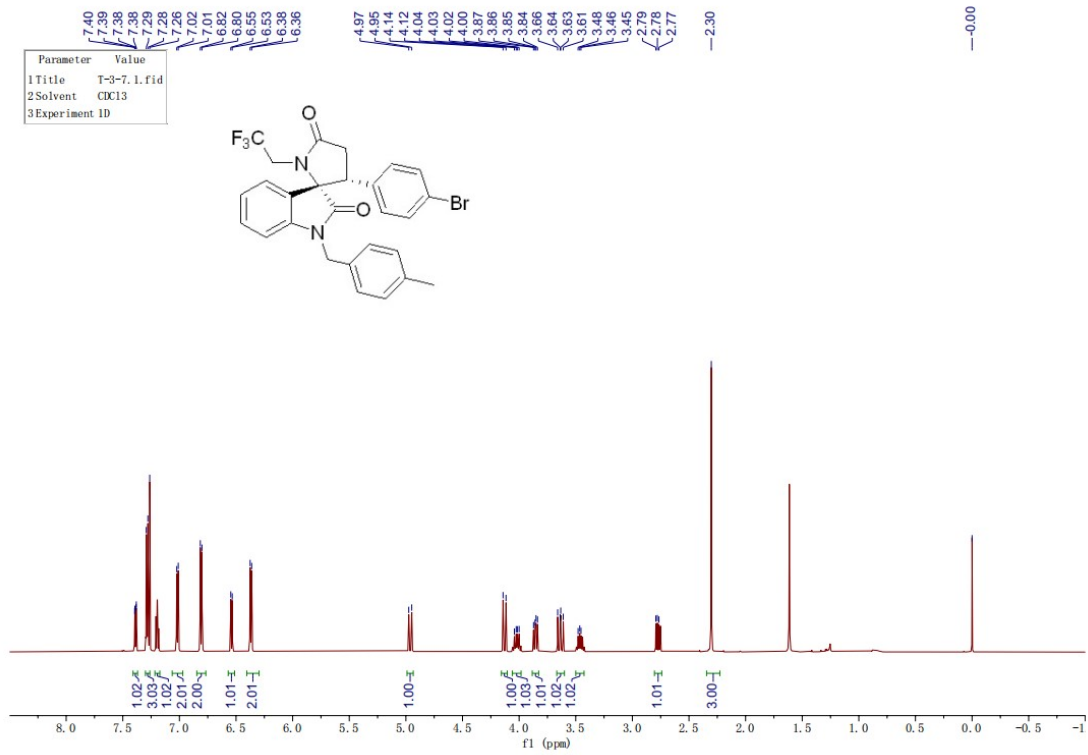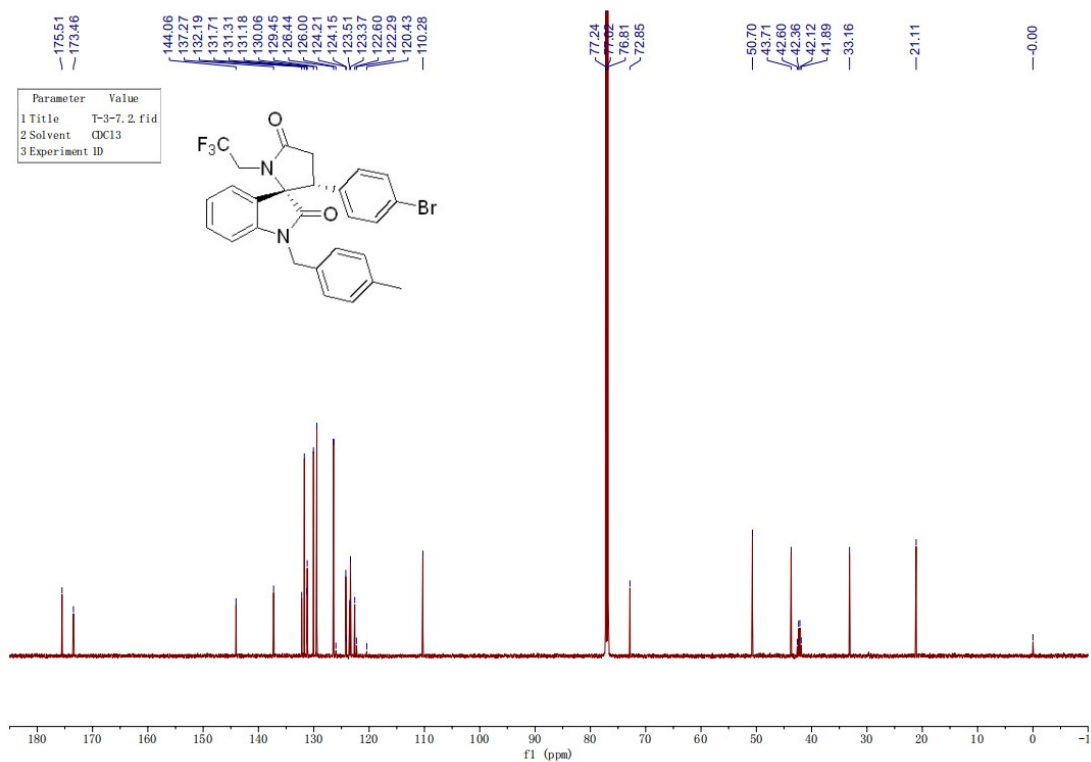

$^1\text{H-NMR}$  and  $^{13}\text{C-NMR}$  of **4aa**

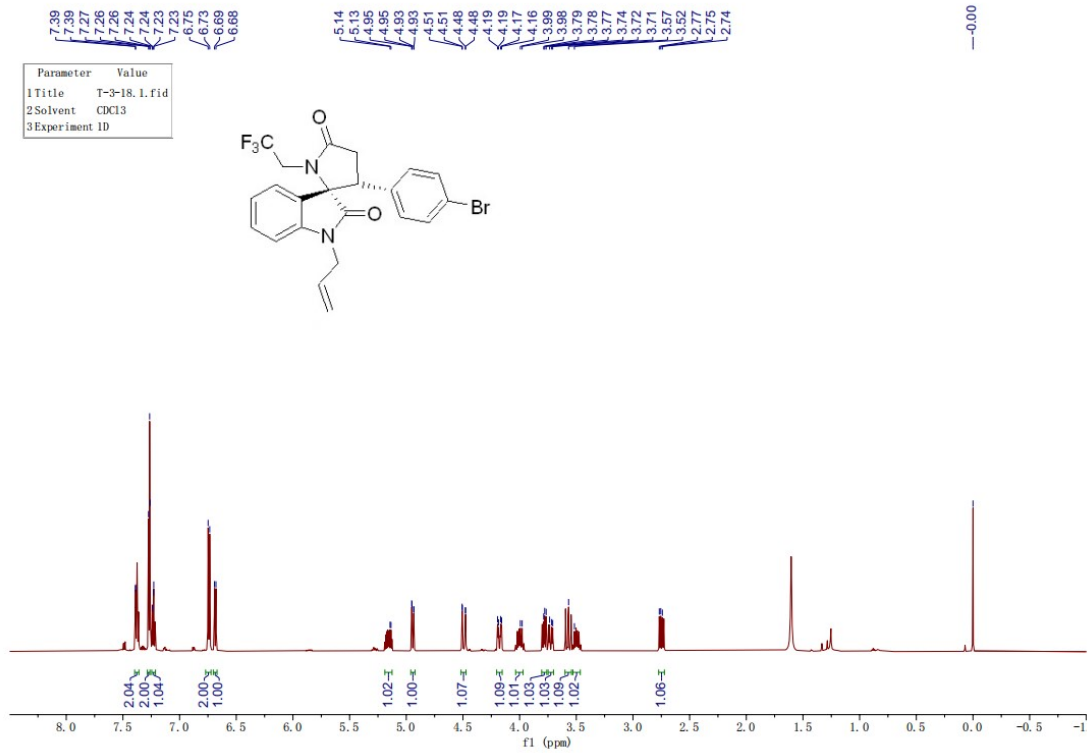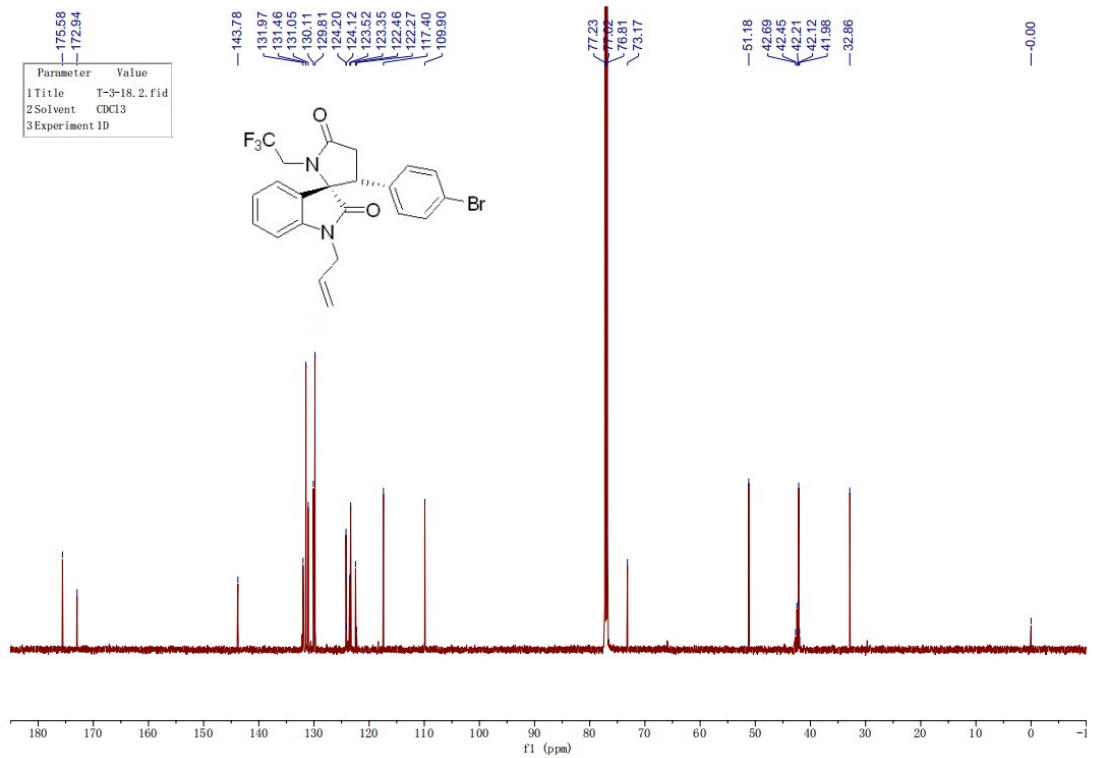

<sup>1</sup>H-NMR and <sup>13</sup>C-NMR of **4ab**



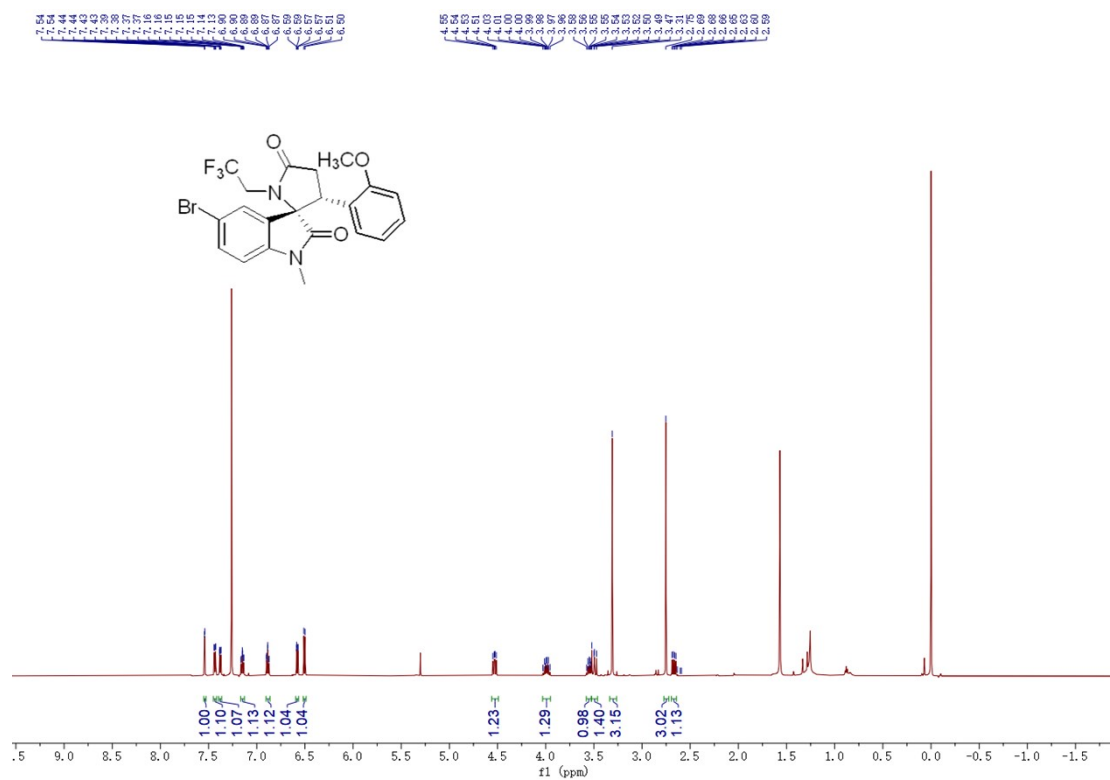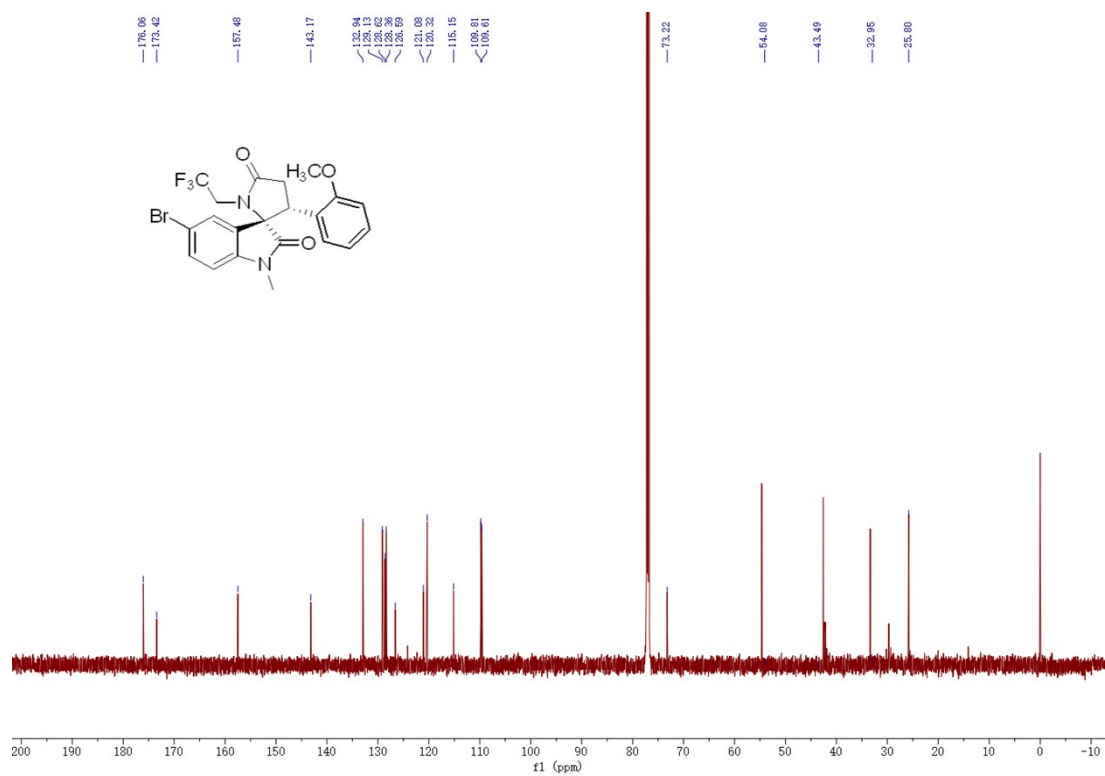

**<sup>1</sup>H-NMR and <sup>13</sup>C-NMR of 4ac**



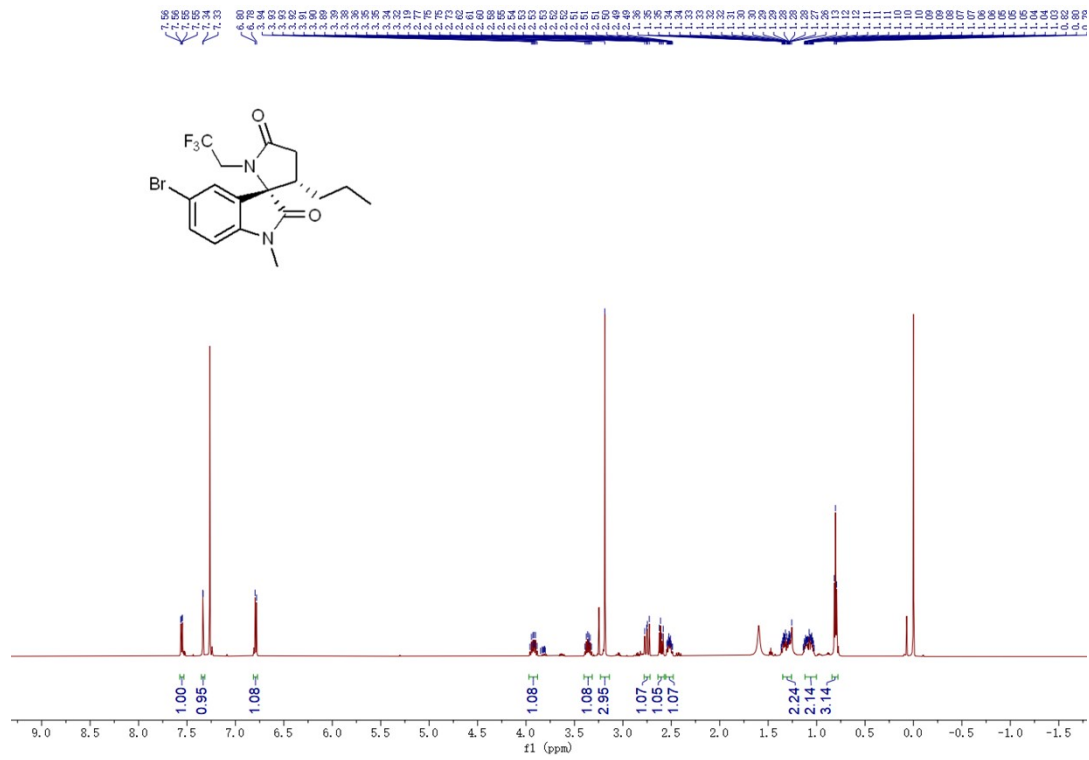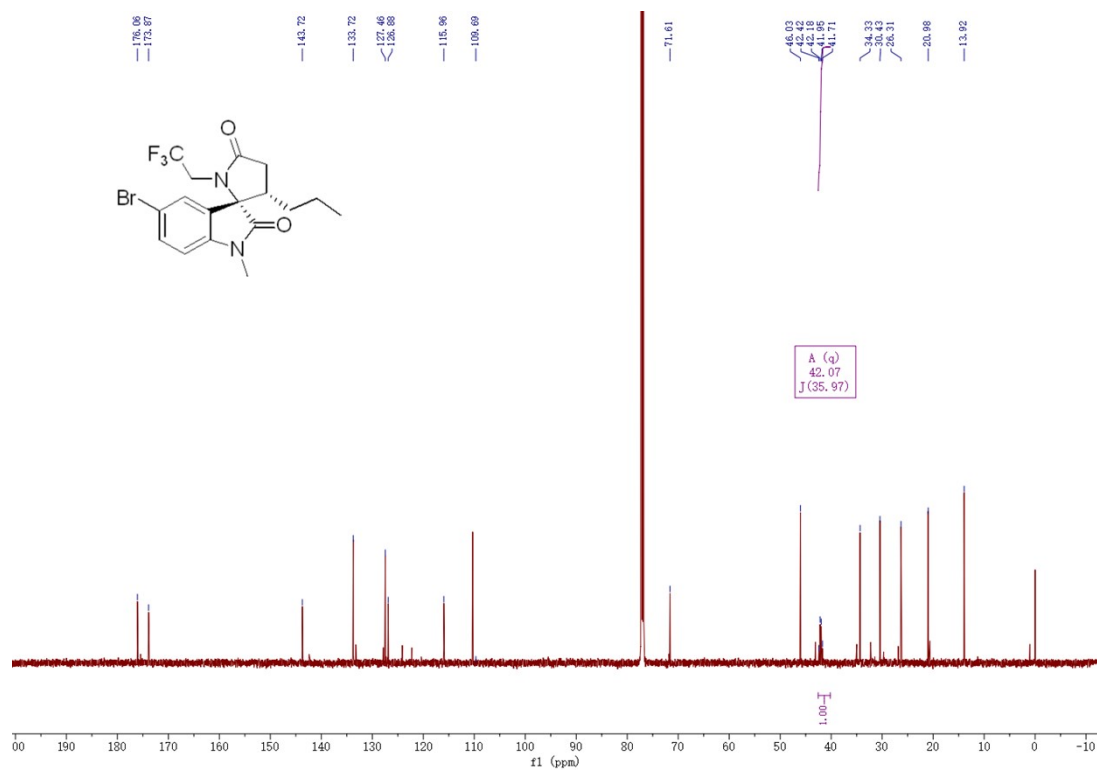

$^1\text{H-NMR}$  and  $^{13}\text{C-NMR}$  of **4ae**

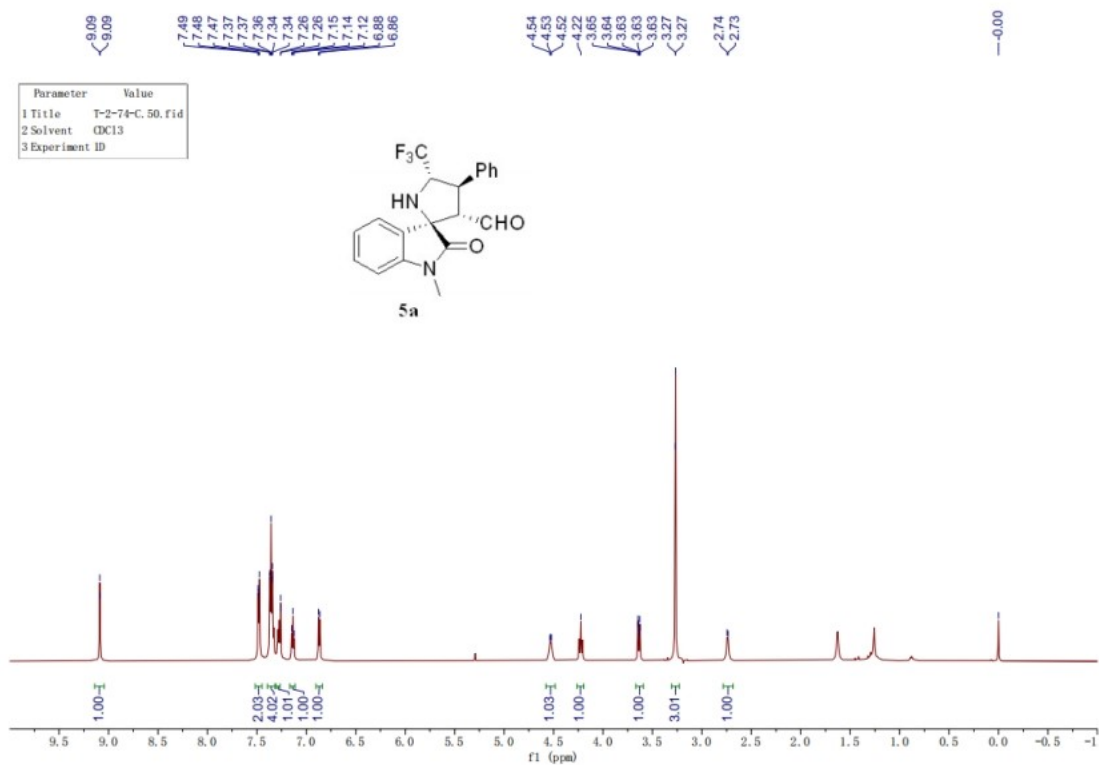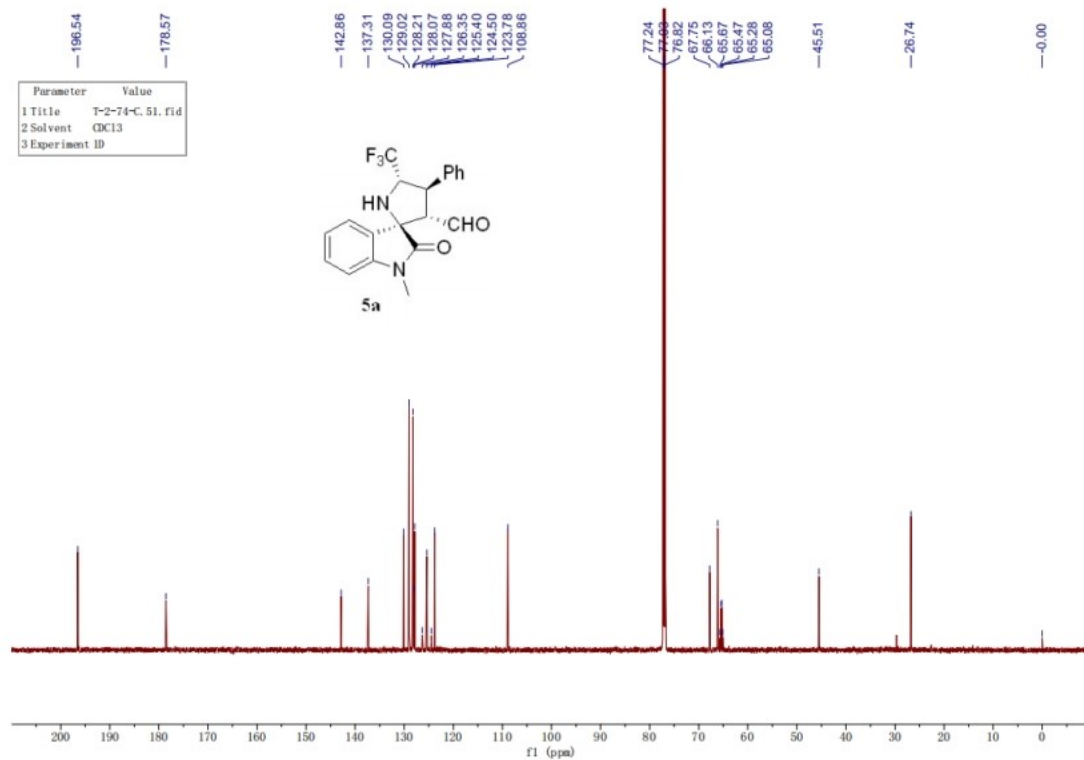

**<sup>1</sup>H-NMR and <sup>13</sup>C-NMR of 5a**

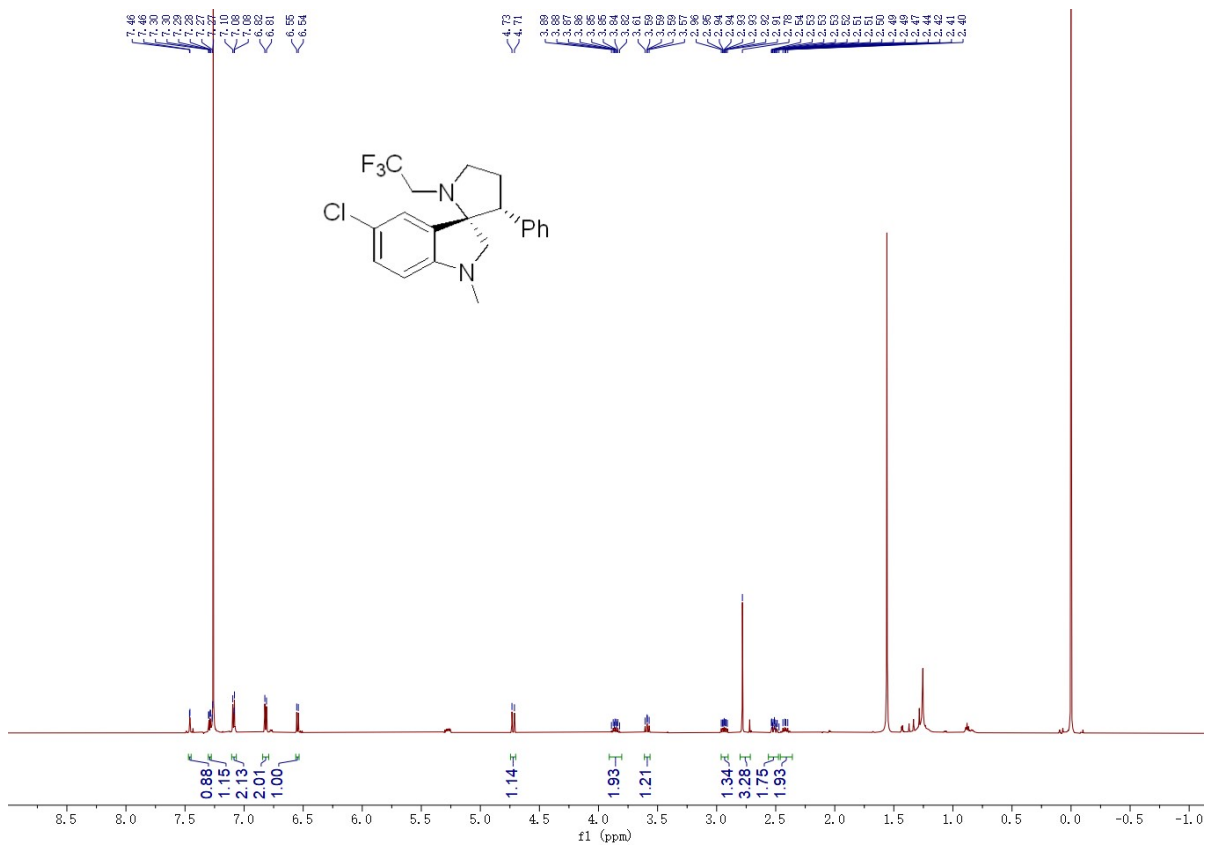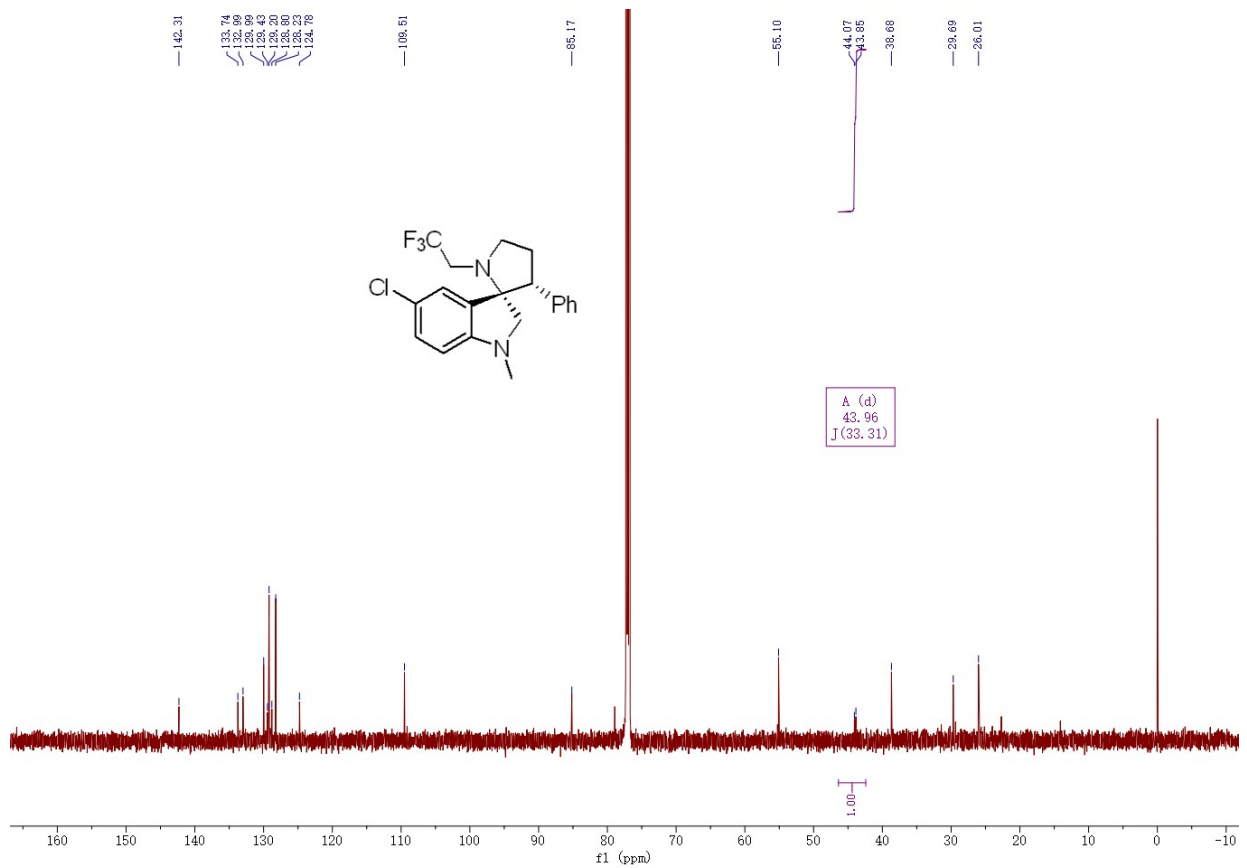

<sup>1</sup>H-NMR and <sup>13</sup>C-NMR of **6I**

### 13 HPLC Traces

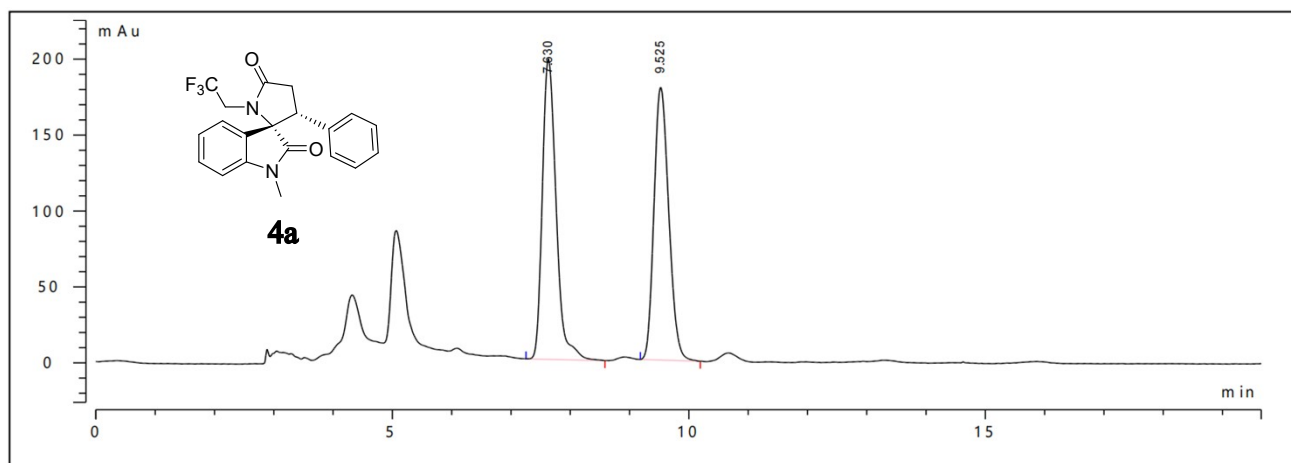

| No | Name (NA) | Ret. time (min) | Area (mAu*s) | Plate number (min) | Tailing (mAu) | Area (%) (NA) |
|----|-----------|-----------------|--------------|--------------------|---------------|---------------|
| 1  | N.A.      | 7.630           | 3206.265     | 0.399              | 198.114       | 50.746        |
| 2  | N.A.      | 9.525           | 3112.031     | 0.446              | 179.900       | 49.254        |
| 3  |           |                 |              |                    |               |               |

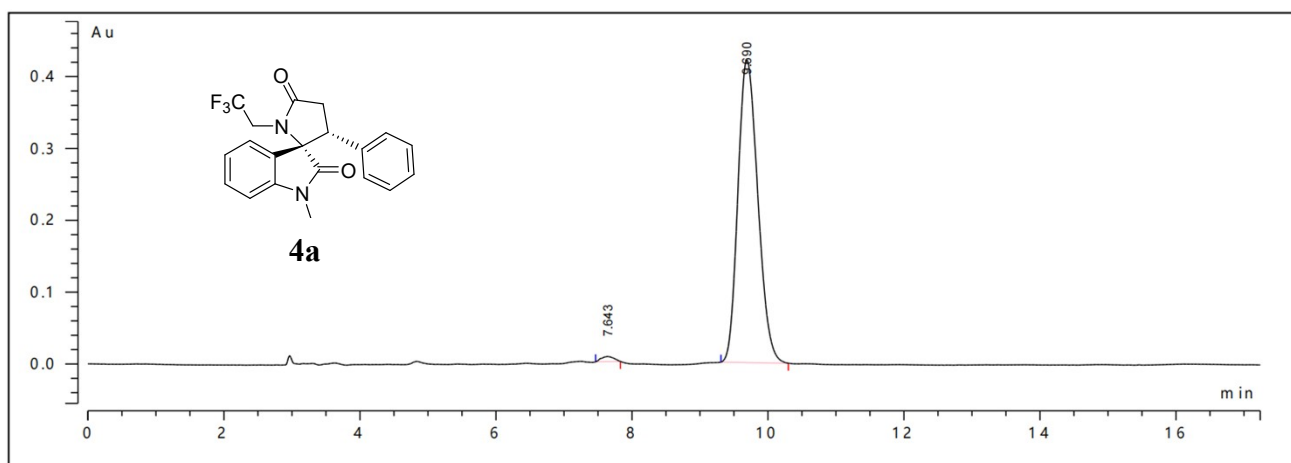

| No | Name (NA) | Ret. time (min) | Area (mAu*s) | Plate number (min) | Tailing (mAu) | Area% (%) (NA) |
|----|-----------|-----------------|--------------|--------------------|---------------|----------------|
| 1  | N.A.      | 7.643           | 92.404       | 0.336              | 7.152         | 1.068          |
| 2  | N.A.      | 9.690           | 8562.663     | 0.523              | 421.628       | 98.932         |
| 3  |           |                 | 8655.067     |                    |               |                |

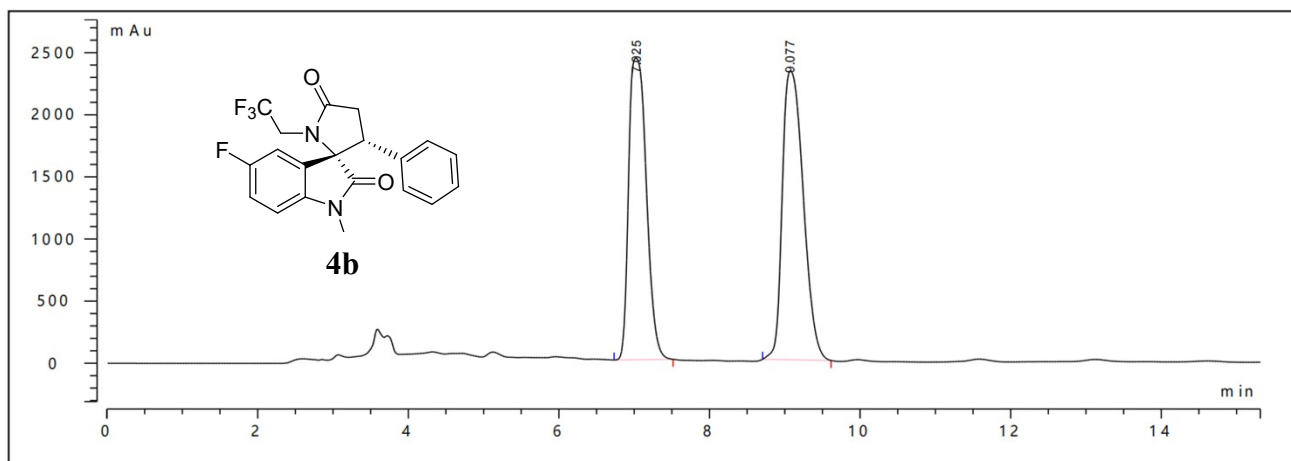

| No | Name (NA) | Ret. time (min) | Area (mAu*s) | Plate number (min) | Tailing (mAu) | Area (%) (NA) |
|----|-----------|-----------------|--------------|--------------------|---------------|---------------|
| 1  | N.A.      | 7.025           | 39684.861    | 0.378              | 2429.398      | 46.898        |
| 2  | N.A.      | 9.077           | 44935.472    | 0.468              | 2326.596      | 53.102        |
| 3  |           |                 |              |                    |               |               |

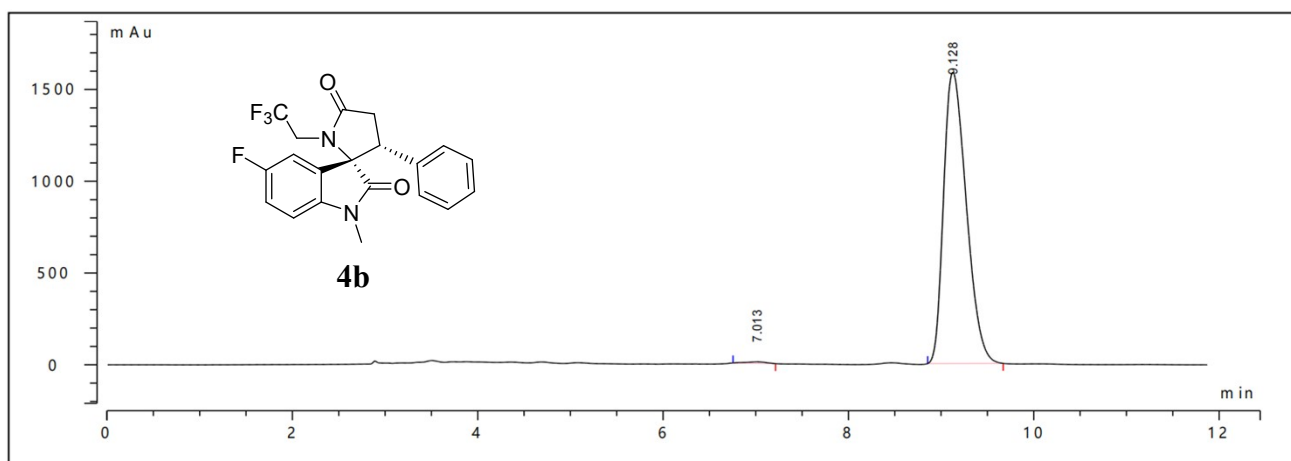

| No | Name (NA) | Ret. time (min) | Area (mAu*s) | Plate number (min) | Tailing (mAu) | Area (%) (NA) |
|----|-----------|-----------------|--------------|--------------------|---------------|---------------|
| 1  | N.A.      | 7.013           | 119.022      | 0.440              | 8.242         | 0.438         |
| 2  | N.A.      | 9.128           | 27033.292    | 0.433              | 1587.713      | 99.562        |
| 3  |           |                 |              |                    |               |               |

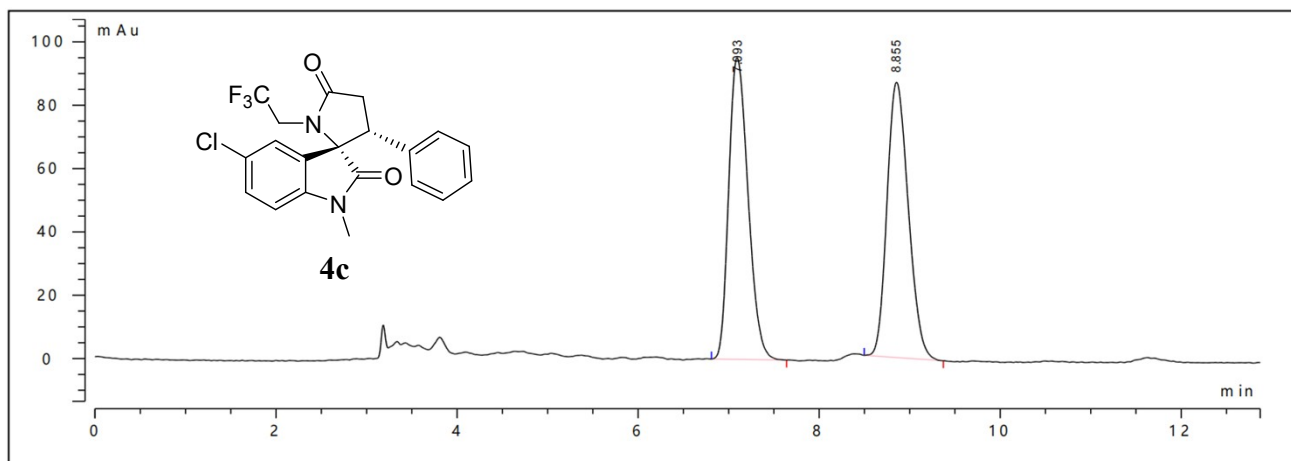

| No | Name (NA) | Ret. time (min) | Area (mAu*s) | Plate number (min) | Tailing (mAu) | Area (%) (NA) |
|----|-----------|-----------------|--------------|--------------------|---------------|---------------|
| 1  | N.A.      | 7.093           | 1412.476     | 0.378              | 95.273        | 49.839        |
| 2  | N.A.      | 8.855           | 1421.616     | 0.421              | 86.938        | 50.161        |
| 3  |           |                 |              |                    |               |               |

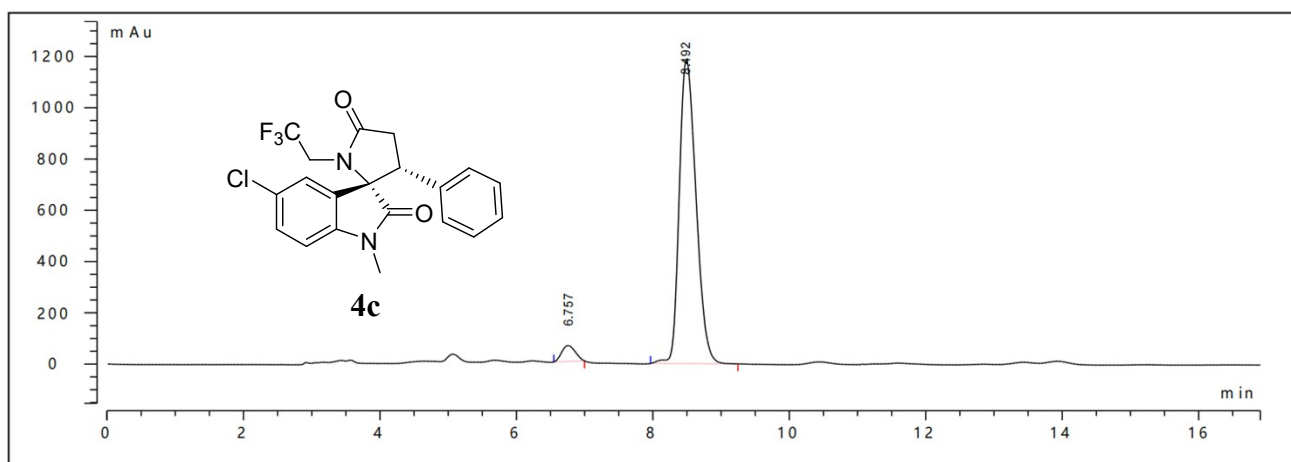

| No | Name (NA) | Ret. time (min) | Area (mAu*s) | Plate number (min) | Tailing (mAu) | Area (%) (NA) |
|----|-----------|-----------------|--------------|--------------------|---------------|---------------|
| 1  | N.A.      | 6.757           | 859.181      | 0.366              | 62.371        | 4.068         |
| 2  | N.A.      | 8.492           | 20262.061    | 0.438              | 1185.897      | 95.932        |
| 3  |           |                 |              |                    |               |               |



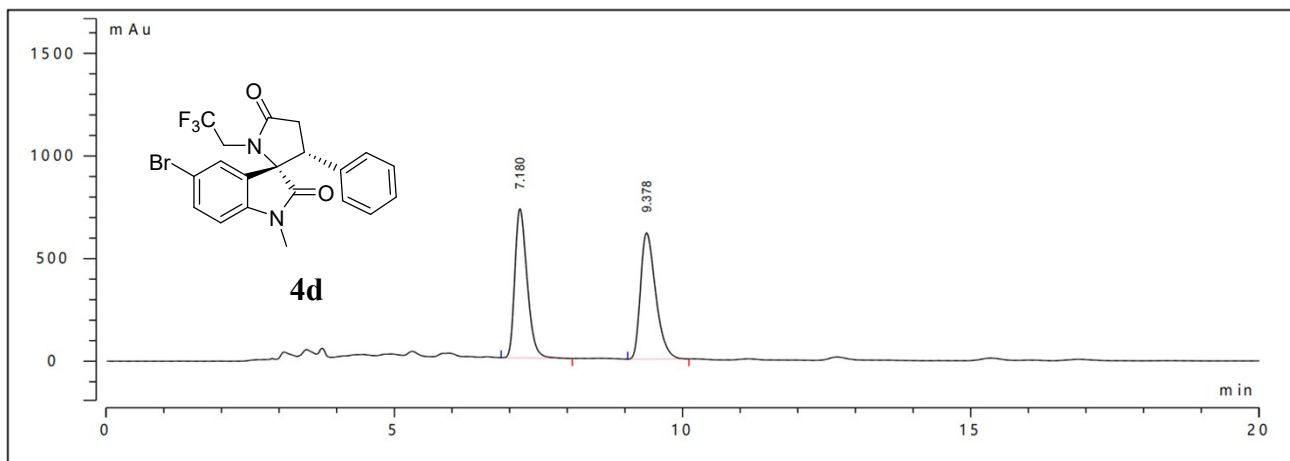

| No | Name (NA) | Ret. time (min) | Area (mAu*s) | Plate number (min) | Tailing (mAu) | Area (%) (NA) |
|----|-----------|-----------------|--------------|--------------------|---------------|---------------|
| 1  | N.A.      | 7.180           | 10806.275    | 0.378              | 727.706       | 48.874        |
| 2  | N.A.      | 9.378           | 11304.258    | 0.460              | 616.052       | 51.126        |
| 3  |           |                 |              |                    |               |               |

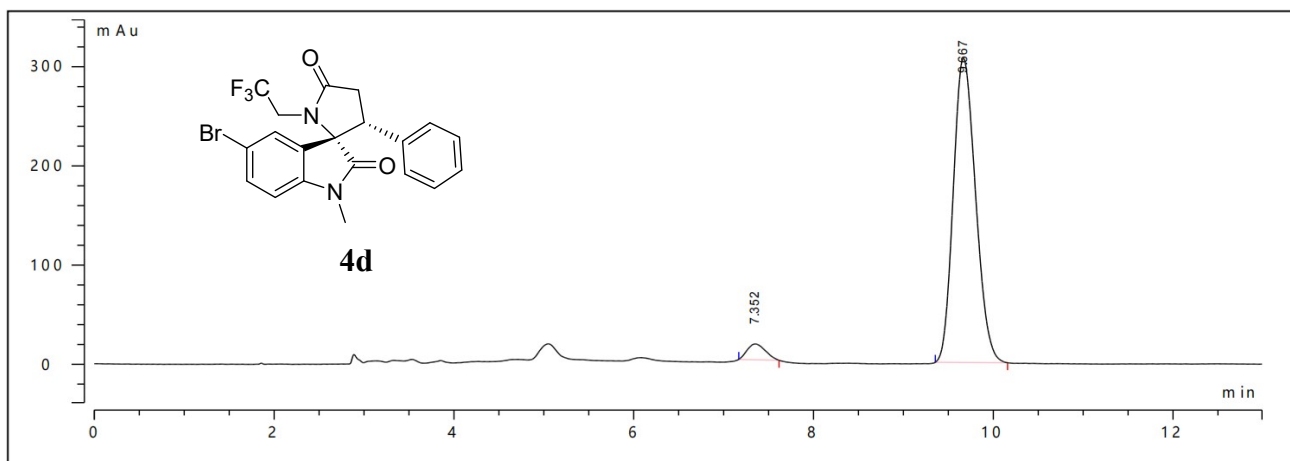

| No | Name (NA) | Ret. time (min) | Area (mAu*s) | Plate number (min) | Tailing (mAu) | Area (%) (NA) |
|----|-----------|-----------------|--------------|--------------------|---------------|---------------|
| 1  | N.A.      | 7.352           | 224.114      | 0.374              | 15.961        | 4.070         |
| 2  | N.A.      | 9.667           | 5282.201     | 0.447              | 306.916       | 95.930        |
| 3  |           |                 |              |                    |               |               |

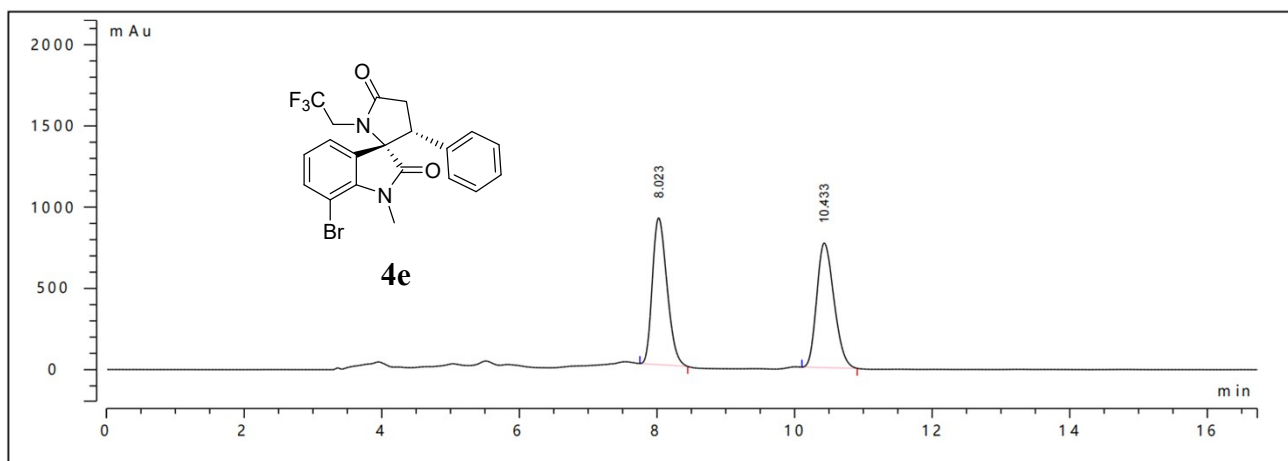

| No | Name (NA) | Ret. time (min) | Area (mAu*s) | Plate number (min) | Tailing (mAu) | Area (%) (NA) |
|----|-----------|-----------------|--------------|--------------------|---------------|---------------|
| 1  | N.A.      | 8.023           | 13396.951    | 0.389              | 906.126       | 49.986        |
| 2  | N.A.      | 10.433          | 13404.641    | 0.445              | 767.942       | 50.014        |
| 3  |           |                 |              |                    |               |               |

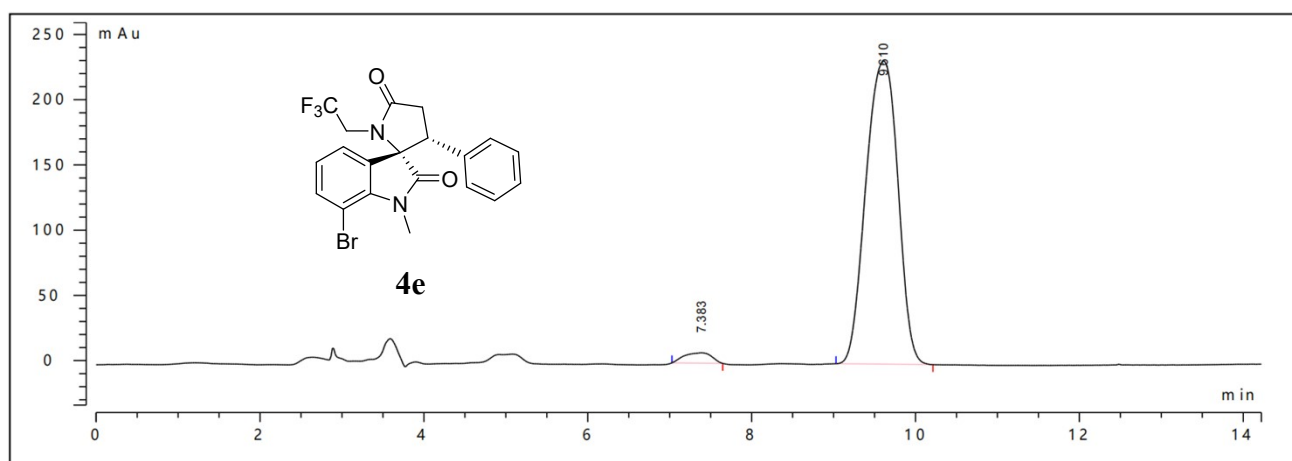

| No | Name (NA) | Ret. time (min) | Area (mAu*s) | Plate number (min) | Tailing (mAu) | Area (%) (NA) |
|----|-----------|-----------------|--------------|--------------------|---------------|---------------|
| 1  | N.A.      | 7.383           | 184.686      | 0.571              | 7.912         | 2.842         |
| 2  | N.A.      | 9.610           | 6313.642     | 0.682              | 232.456       | 97.158        |
| 3  |           |                 |              |                    |               |               |

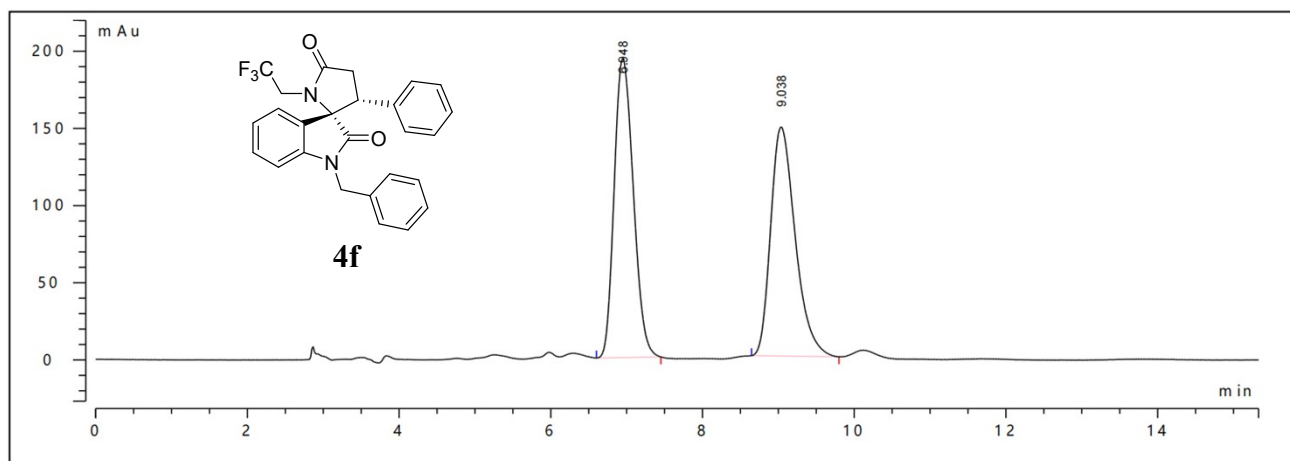

| No | Name (NA) | Ret. time (min) | Area (mAu*s) | Plate number (min) | Tailing (mAu) | Area (%) (NA) |
|----|-----------|-----------------|--------------|--------------------|---------------|---------------|
| 1  | N.A.      | 6.948           | 3402.420     | 0.450              | 193.879       | 50.461        |
| 2  | N.A.      | 9.038           | 3340.251     | 0.567              | 148.547       | 49.539        |
| 3  |           |                 |              |                    |               |               |

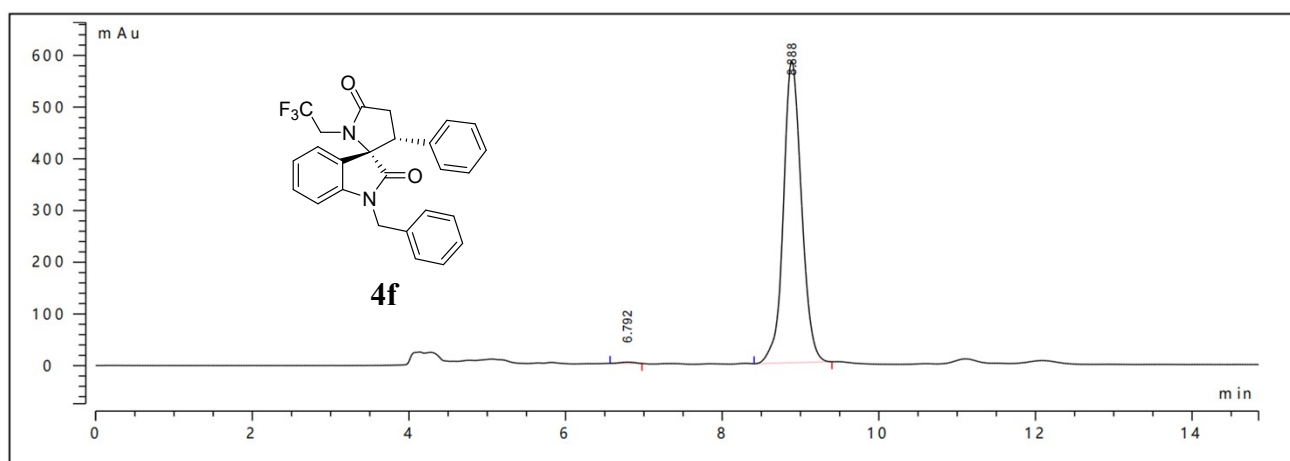

| No | Name (NA) | Ret. time (min) | Area (mAu*s) | Plate number (min) | Tailing (mAu) | Area (%) (NA) |
|----|-----------|-----------------|--------------|--------------------|---------------|---------------|
| 1  | N.A.      | 6.792           | 30.591       | 0.318              | 2.459         | 0.325         |
| 2  | N.A.      | 8.888           | 9372.040     | 0.396              | 584.444       | 99.675        |
| 3  |           |                 |              |                    |               |               |

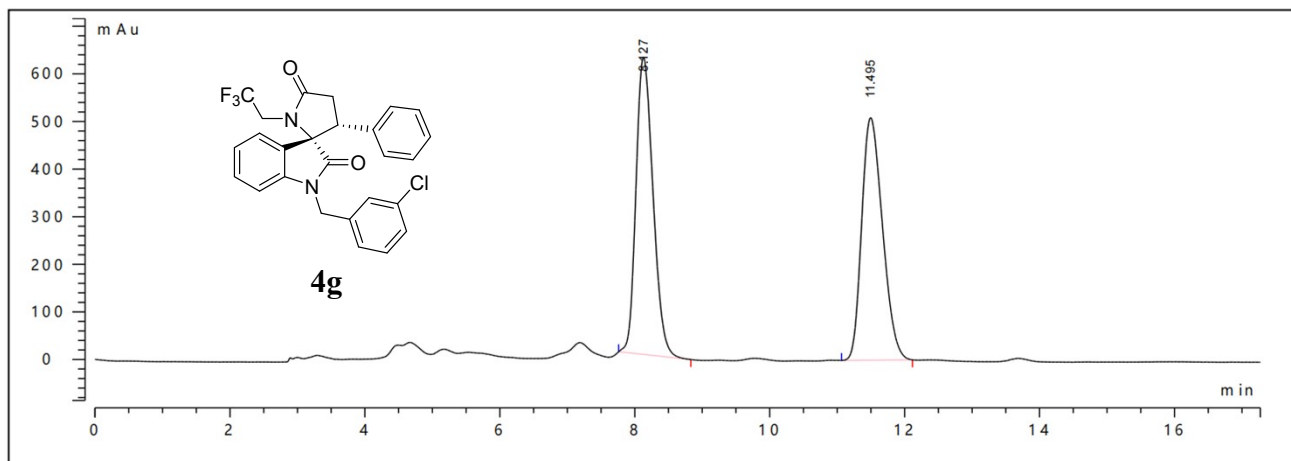

| No | Name (NA) | Ret. time (min) | Area (mAu*s) | Plate number (min) | Tailing (mAu) | Area (%) (NA) |
|----|-----------|-----------------|--------------|--------------------|---------------|---------------|
| 1  | N.A.      | 8.127           | 10966.262    | 0.454              | 625.183       | 50.132        |
| 2  | N.A.      | 11.495          | 10908.597    | 0.559              | 509.815       | 49.868        |
| 3  |           |                 |              |                    |               |               |

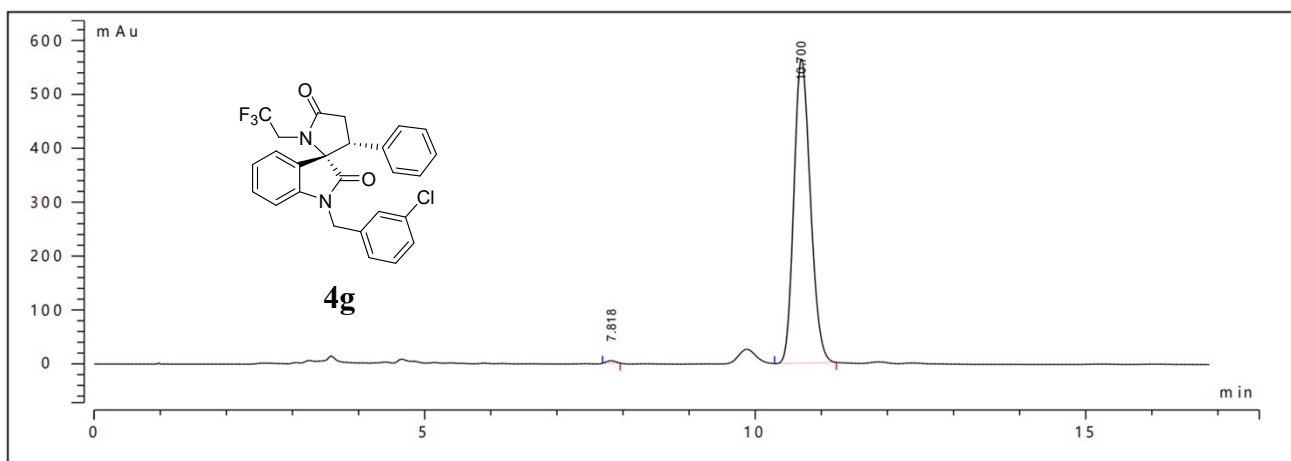

| No | Name (NA) | Ret. time (min) | Area (mAu*s) | Plate number (min) | Tailing (mAu) | Area (%) (NA) |
|----|-----------|-----------------|--------------|--------------------|---------------|---------------|
| 1  | N.A.      | 7.818           | 42.012       | 0.249              | 4.553         | 0.426         |
| 2  | N.A.      | 10.700          | 9816.552     | 0.448              | 564.592       | 99.574        |
| 3  |           |                 |              |                    |               |               |

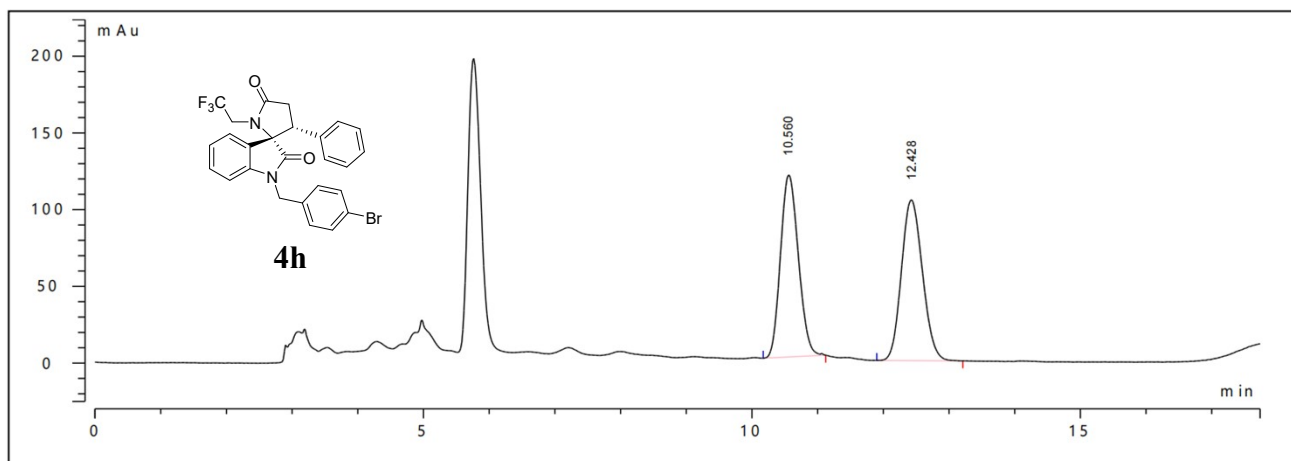

| No | Name (NA) | Ret. time (min) | Area (mAu*s) | Plate number (min) | Tailing (mAu) | Area (%) (NA) |
|----|-----------|-----------------|--------------|--------------------|---------------|---------------|
| 1  | N.A.      | 10.560          | 2244.540     | 0.493              | 118.725       | 49.069        |
| 2  | N.A.      | 12.428          | 2329.708     | 0.579              | 104.801       | 50.931        |
| 3  |           |                 |              |                    |               |               |

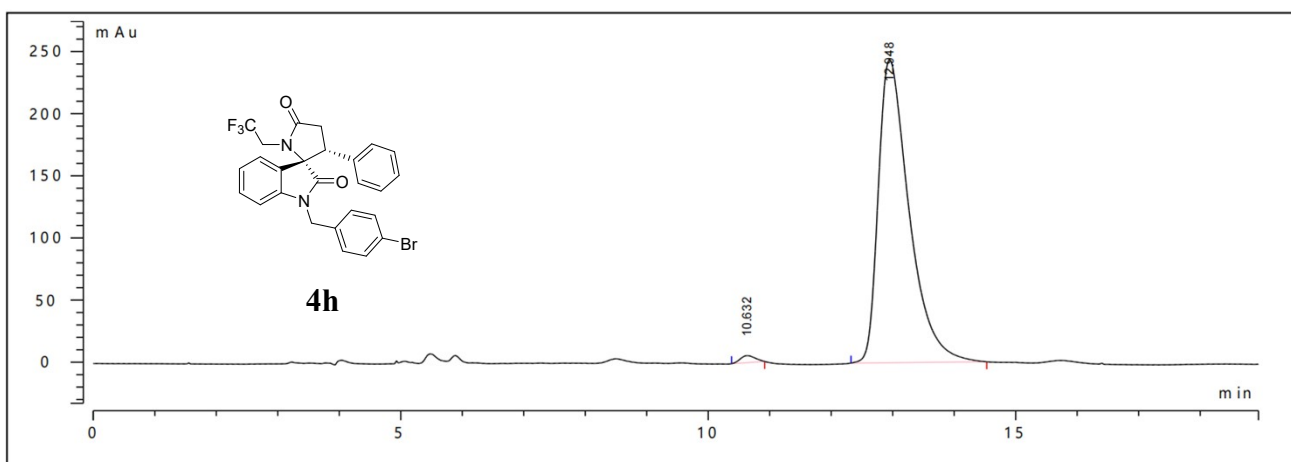

| No | Name (NA) | Ret. time (min) | Area (mAu*s) | Plate number (min) | Tailing (mAu) | Area% (%) (NA) |
|----|-----------|-----------------|--------------|--------------------|---------------|----------------|
| 1  | N.A.      | 10.632          | 93.491       | 0.437              | 5.631         | 1.088          |
| 2  | N.A.      | 12.948          | 8498.850     | 0.850              | 243.844       | 98.912         |
| 3  |           |                 | 8592.341     |                    |               |                |

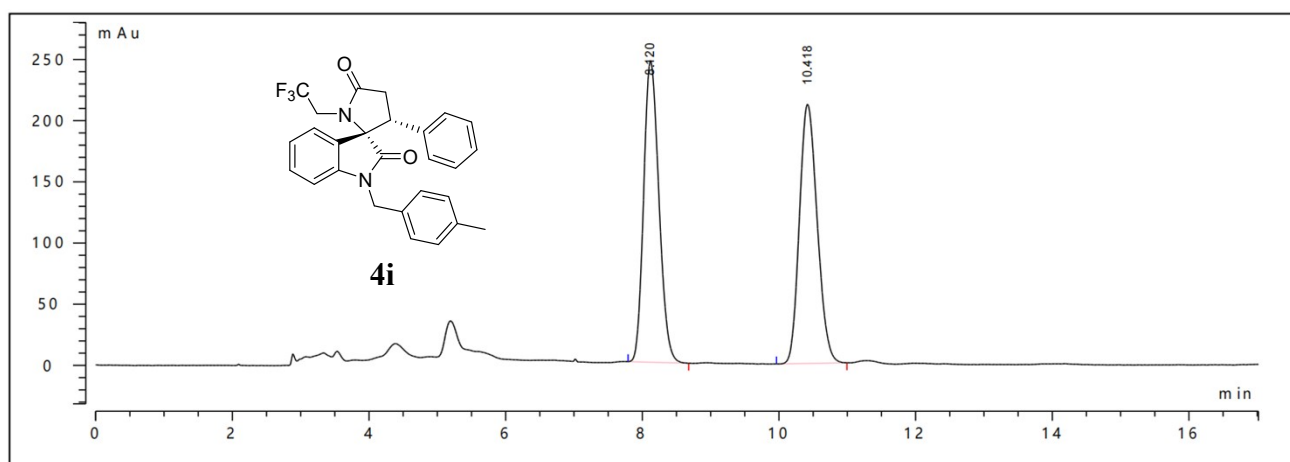

| No | Name (NA) | Ret. time (min) | Area (mAu*s) | Plate number (min) | Tailing (mAu) | Area (%) (NA) |
|----|-----------|-----------------|--------------|--------------------|---------------|---------------|
| 1  | N.A.      | 8.120           | 3825.186     | 0.396              | 246.588       | 49.927        |
| 2  | N.A.      | 10.418          | 3836.344     | 0.470              | 211.825       | 50.073        |
| 3  |           |                 |              |                    |               |               |

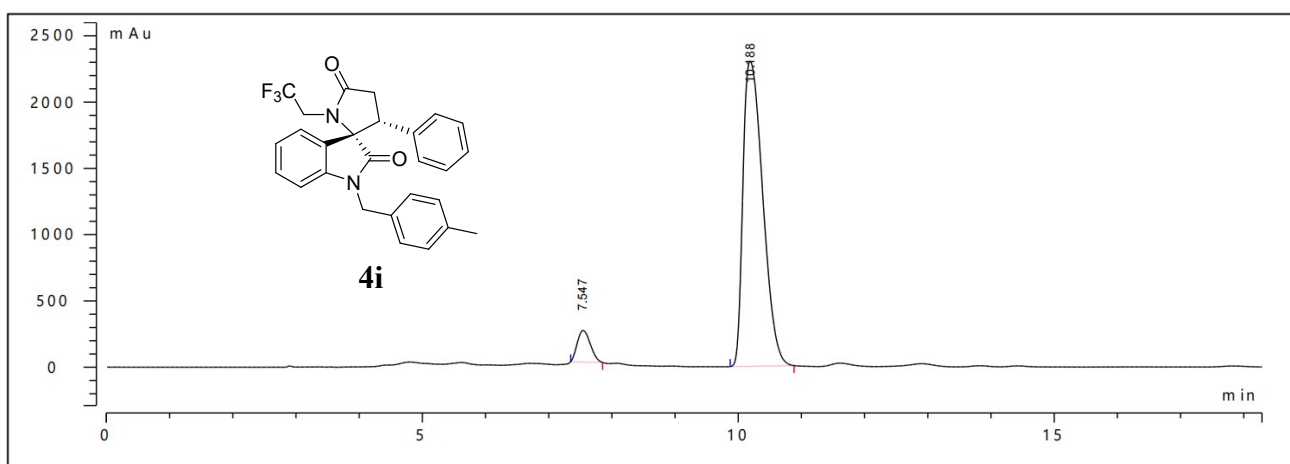

| No | Name (NA) | Ret. time (min) | Area (mAu*s) | Plate number (min) | Tailing (mAu) | Area (%) (NA) |
|----|-----------|-----------------|--------------|--------------------|---------------|---------------|
| 1  | N.A.      | 7.547           | 3433.490     | 0.375              | 239.220       | 6.408         |
| 2  | N.A.      | 10.188          | 50144.472    | 0.547              | 2303.094      | 93.592        |
| 3  |           |                 |              |                    |               |               |

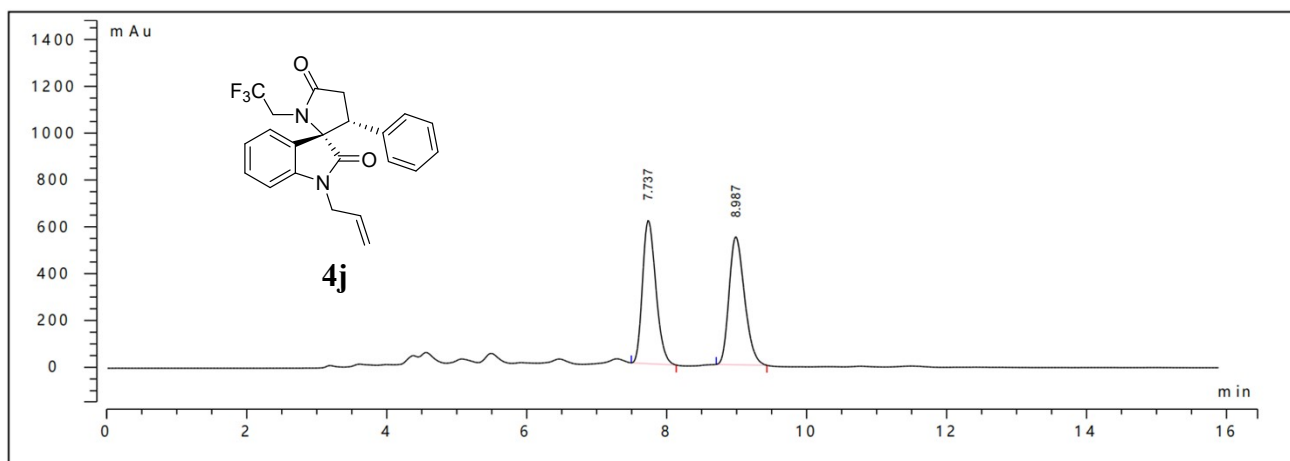

| No | Name (NA) | Ret. time (min) | Area (mAu*s) | Plate number (min) | Tailing (mAu) | Area (%) (NA) |
|----|-----------|-----------------|--------------|--------------------|---------------|---------------|
| 1  | N.A.      | 7.737           | 8135.275     | 0.342              | 613.089       | 49.210        |
| 2  | N.A.      | 8.987           | 8396.604     | 0.394              | 546.845       | 50.790        |
| 3  |           |                 |              |                    |               |               |

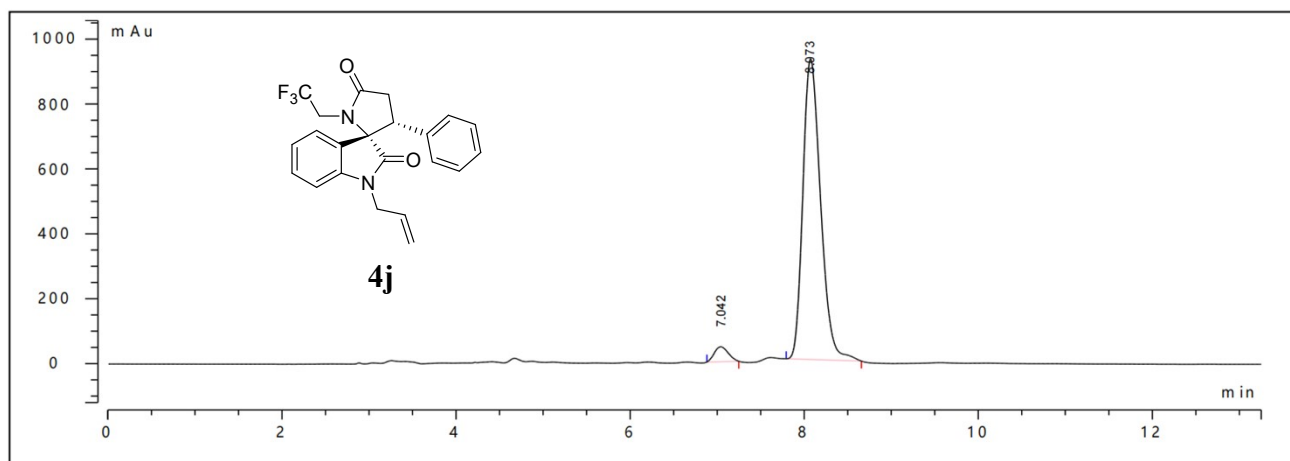

| No | Name (NA) | Ret. time (min) | Area (mAu*s) | Plate number (min) | Tailing (mAu) | Area (%) (NA) |
|----|-----------|-----------------|--------------|--------------------|---------------|---------------|
| 1  | N.A.      | 7.042           | 507.558      | 0.291              | 45.978        | 3.726         |
| 2  | N.A.      | 8.073           | 13115.811    | 0.353              | 926.975       | 96.274        |
| 3  |           |                 |              |                    |               |               |

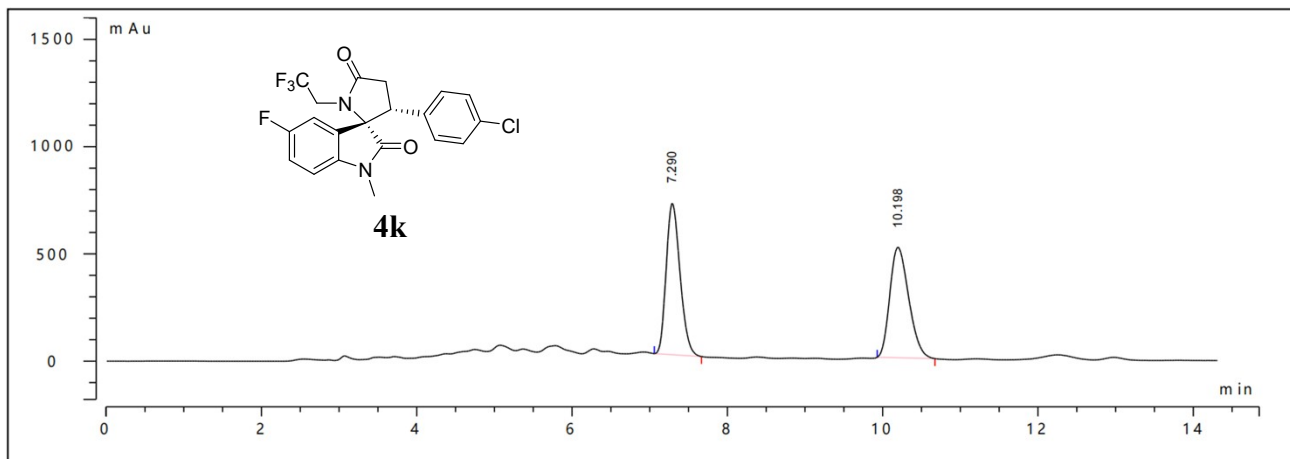

| No | Name (NA) | Ret. time (min) | Area (mAu*s) | Plate number (min) | Tailing (mAu) | Area (%) (NA) |
|----|-----------|-----------------|--------------|--------------------|---------------|---------------|
| 1  | N.A.      | 7.290           | 8777.816     | 0.317              | 707.764       | 50.183        |
| 2  | N.A.      | 10.198          | 8713.906     | 0.434              | 516.246       | 49.817        |
| 3  |           |                 |              |                    |               |               |

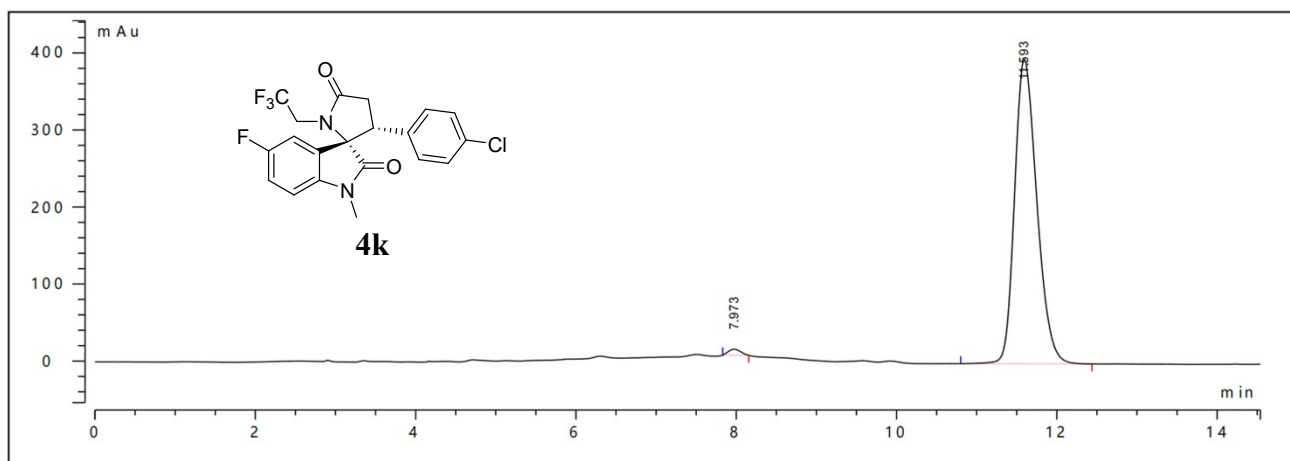

| No | Name (NA) | Ret. time (min) | Area (mAu*s) | Plate number (min) | Tailing (mAu) | Area (%) (NA) |
|----|-----------|-----------------|--------------|--------------------|---------------|---------------|
| 1  | N.A.      | 7.973           | 82.266       | 0.288              | 7.725         | 1.067         |
| 2  | N.A.      | 11.593          | 7626.531     | 0.493              | 395.929       | 98.933        |
| 3  |           |                 |              |                    |               |               |



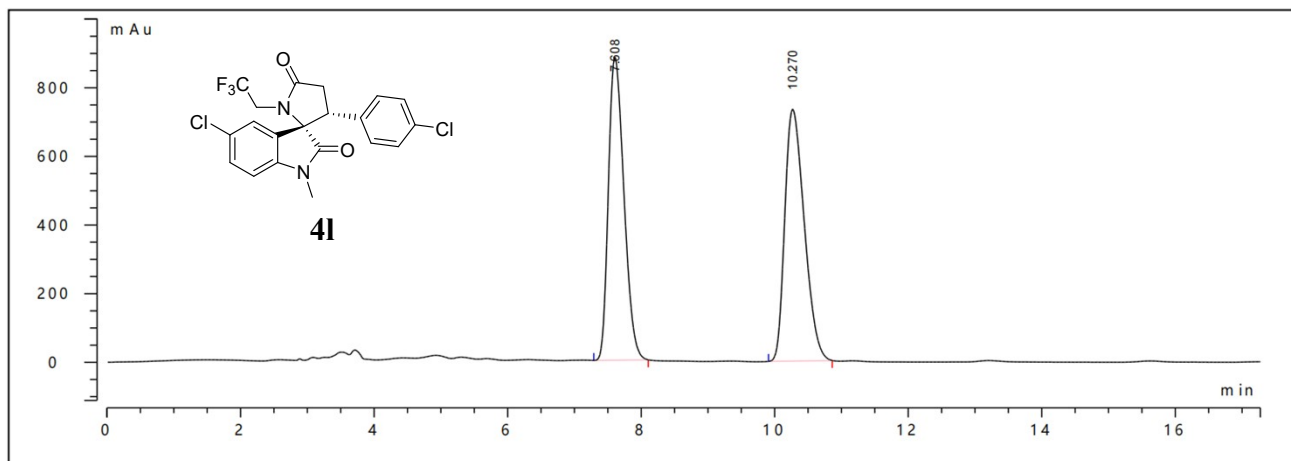

| No | Name (NA) | Ret. time (min) | Area (mAu*s) | Plate number (min) | Tailing (mAu) | Area (%) (NA) |
|----|-----------|-----------------|--------------|--------------------|---------------|---------------|
| 1  | N.A.      | 7.608           | 14300.216    | 0.420              | 884.070       | 49.024        |
| 2  | N.A.      | 10.270          | 14869.881    | 0.526              | 734.426       | 50.976        |
| 3  |           |                 |              |                    |               |               |

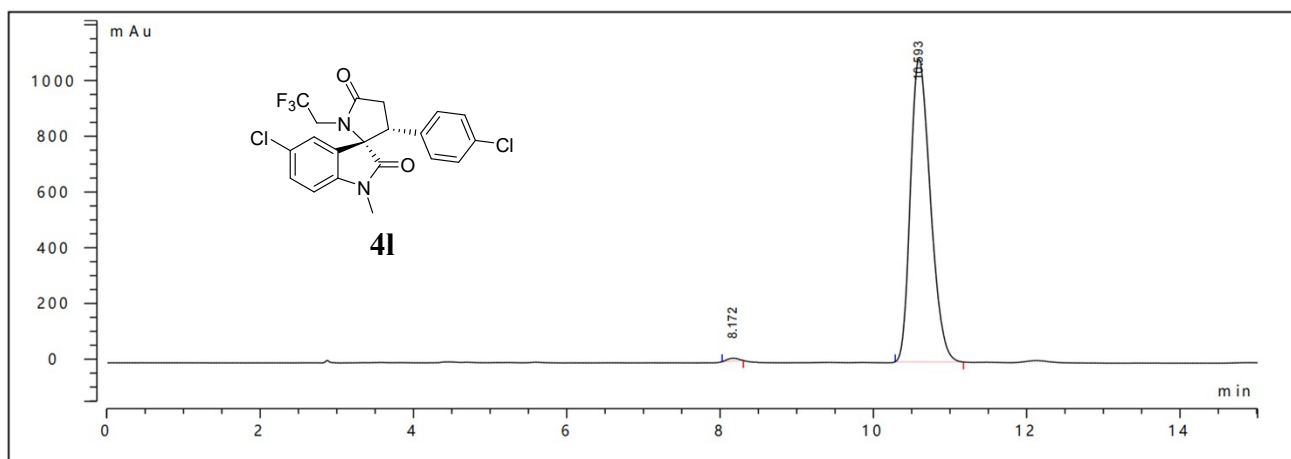

| No | Name (NA) | Ret. time (min) | Area (mAu*s) | Plate number (min) | Tailing (mAu) | Area (%) (NA) |
|----|-----------|-----------------|--------------|--------------------|---------------|---------------|
| 1  | N.A.      | 8.172           | 101.789      | 0.269              | 10.361        | 0.516         |
| 2  | N.A.      | 10.593          | 19611.278    | 0.466              | 1088.176      | 99.484        |
| 3  |           |                 |              |                    |               |               |

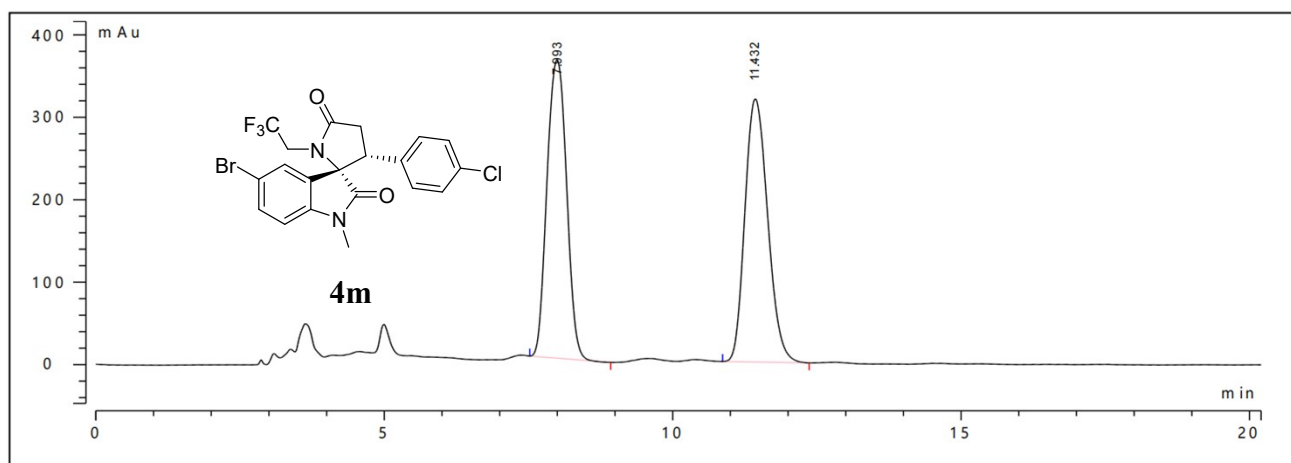

| No | Name (NA) | Ret. time (min) | Area (mAu*s) | Plate number (min) | Tailing (mAu) | Area (%) (NA) |
|----|-----------|-----------------|--------------|--------------------|---------------|---------------|
| 1  | N.A.      | 7.993           | 8551.684     | 0.601              | 362.109       | 49.331        |
| 2  | N.A.      | 11.432          | 8783.538     | 0.698              | 319.302       | 50.669        |
| 3  |           |                 |              |                    |               |               |

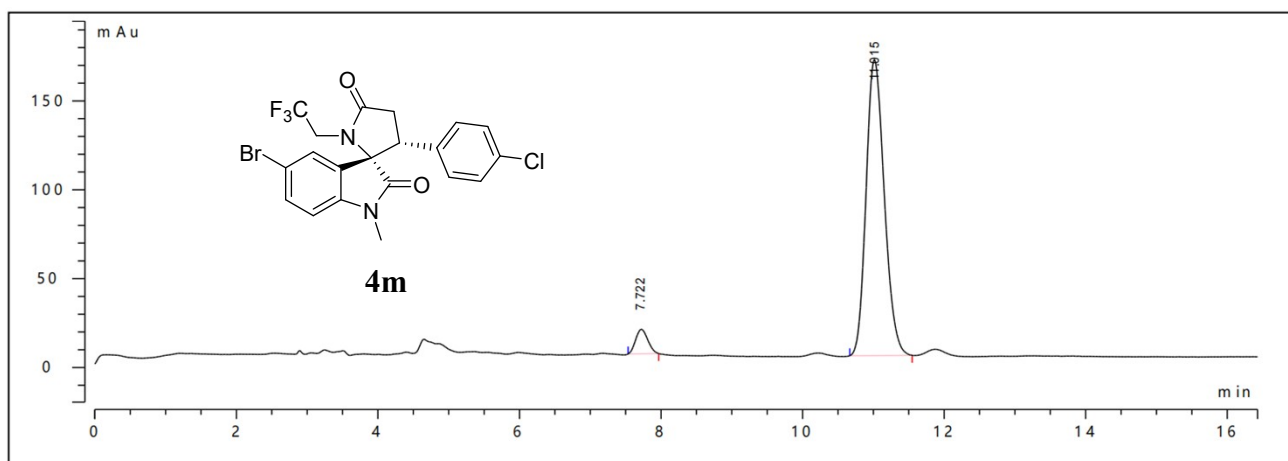

| No | Name (NA) | Ret. time (min) | Area (mAu*s) | Plate number (min) | Tailing (mAu) | Area (%) (NA) |
|----|-----------|-----------------|--------------|--------------------|---------------|---------------|
| 1  | N.A.      | 7.722           | 163.155      | 0.313              | 13.816        | 5.194         |
| 2  | N.A.      | 11.015          | 2978.261     | 0.453              | 166.736       | 94.806        |
| 3  |           |                 |              |                    |               |               |

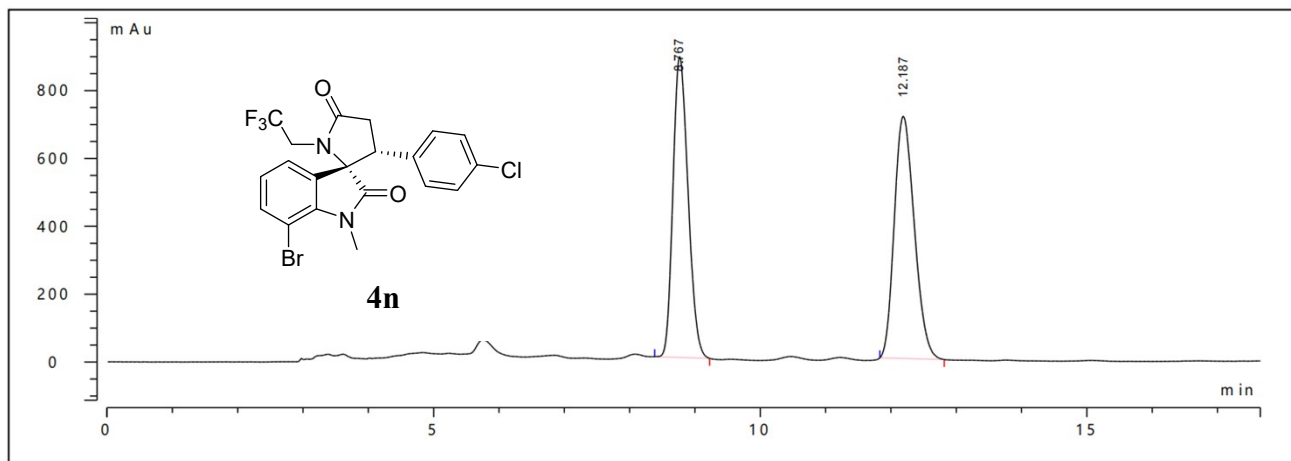

| No | Name (NA) | Ret. time (min) | Area (mAu*s) | Plate number (min) | Tailing (mAu) | Area (%) (NA) |
|----|-----------|-----------------|--------------|--------------------|---------------|---------------|
| 1  | N.A.      | 8.767           | 14239.053    | 0.417              | 886.892       | 48.337        |
| 2  | N.A.      | 12.187          | 15219.106    | 0.552              | 714.366       | 51.663        |
| 3  |           |                 |              |                    |               |               |

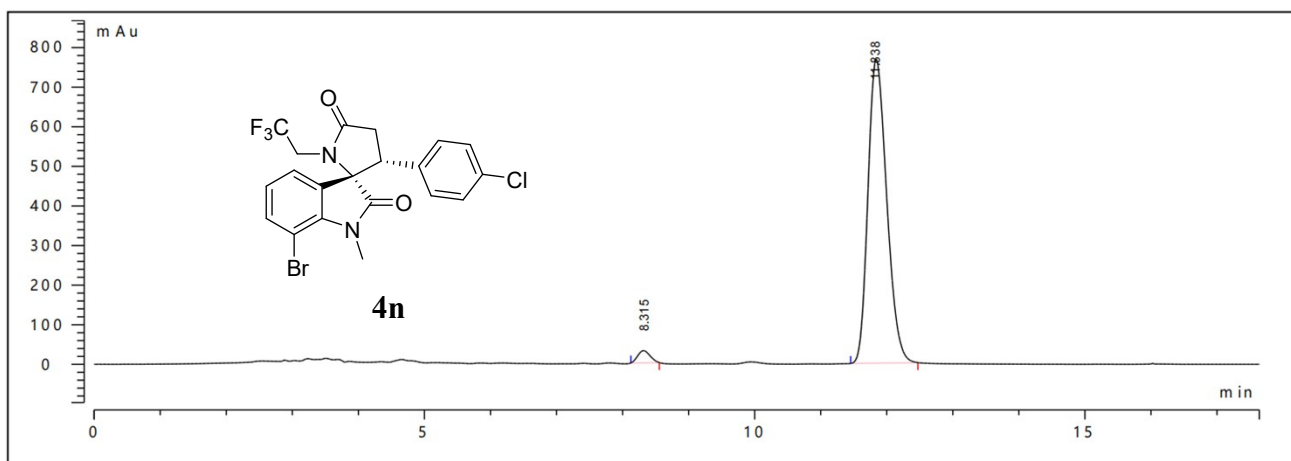

| No | Name (NA) | Ret. time (min) | Area (mAu*s) | Plate number (min) | Tailing (mAu) | Area (%) (NA) |
|----|-----------|-----------------|--------------|--------------------|---------------|---------------|
| 1  | N.A.      | 8.315           | 394.187      | 0.343              | 30.759        | 2.534         |
| 2  | N.A.      | 11.838          | 15164.131    | 0.506              | 768.653       | 97.466        |
| 3  |           |                 |              |                    |               |               |

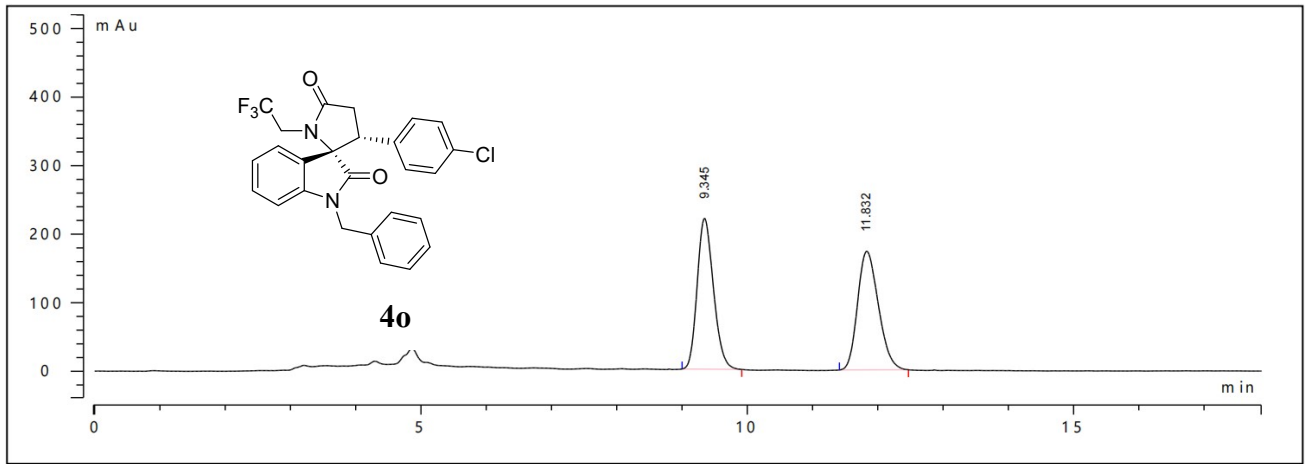

| No | Name (NA) | Ret. time (min) | Area (mAu*s) | Plate number (min) | Tailing (mAu) | Area (%) (NA) |
|----|-----------|-----------------|--------------|--------------------|---------------|---------------|
| 1  | N.A.      | 9.345           | 3818.343     | 0.448              | 220.342       | 49.891        |
| 2  | N.A.      | 11.832          | 3835.102     | 0.567              | 173.229       | 50.109        |
| 3  |           |                 |              |                    |               |               |

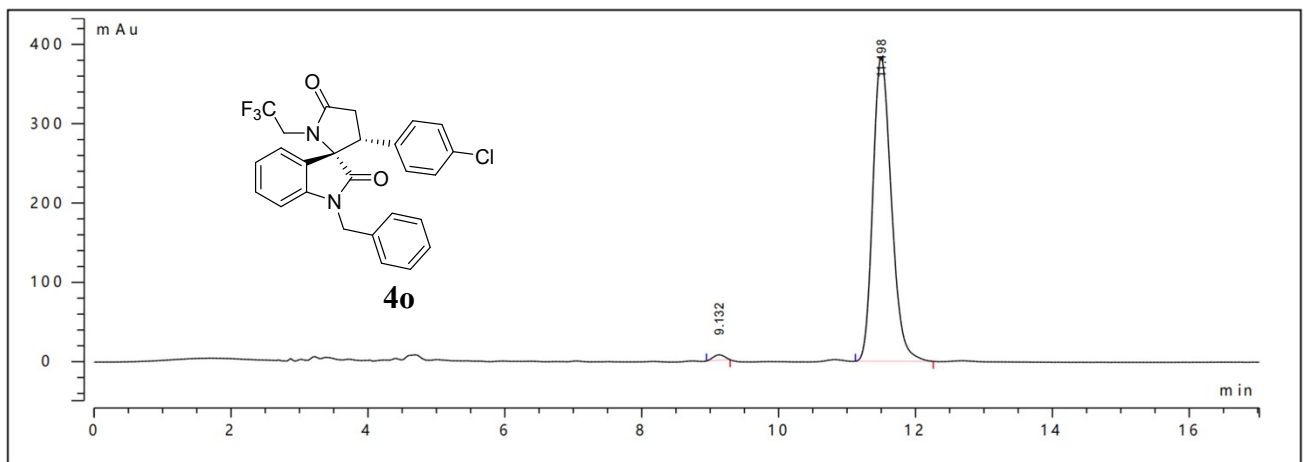

| No | Name (NA) | Ret. time (min) | Area (mAu*s) | Plate number (min) | Tailing (mAu) | Area (%) (NA) |
|----|-----------|-----------------|--------------|--------------------|---------------|---------------|
| 1  | N.A.      | 9.132           | 78.938       | 0.311              | 6.895         | 1.085         |
| 2  | N.A.      | 11.498          | 7199.555     | 0.477              | 383.849       | 98.915        |
| 3  |           |                 |              |                    |               |               |

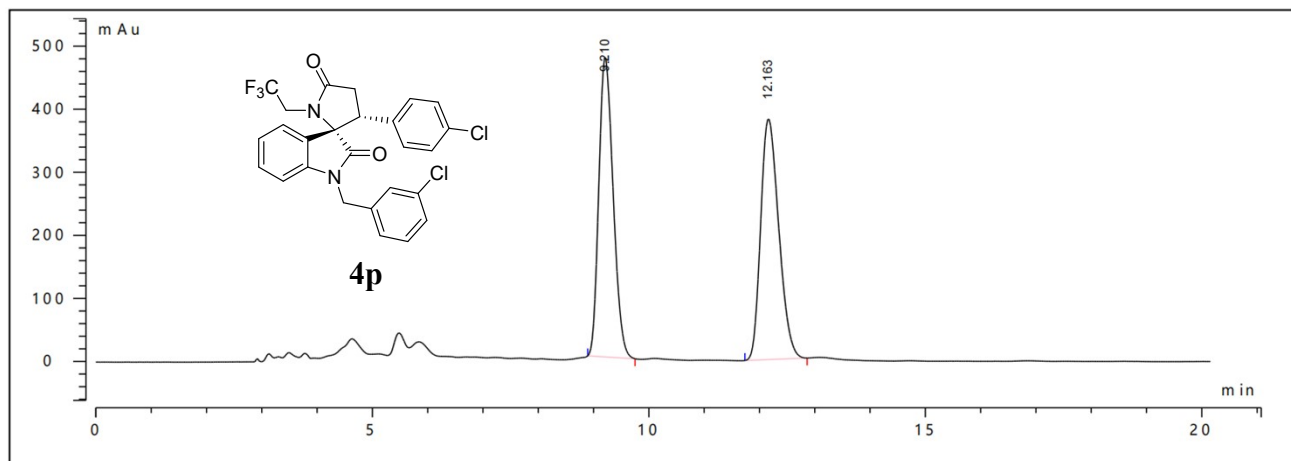

| No | Name (NA) | Ret. time (min) | Area (mAu*s) | Plate number (min) | Tailing (mAu) | Area (%) (NA) |
|----|-----------|-----------------|--------------|--------------------|---------------|---------------|
| 1  | N.A.      | 9.210           | 8561.680     | 0.464              | 476.042       | 49.671        |
| 2  | N.A.      | 12.163          | 8674.970     | 0.575              | 382.202       | 50.329        |
| 3  |           |                 |              |                    |               |               |

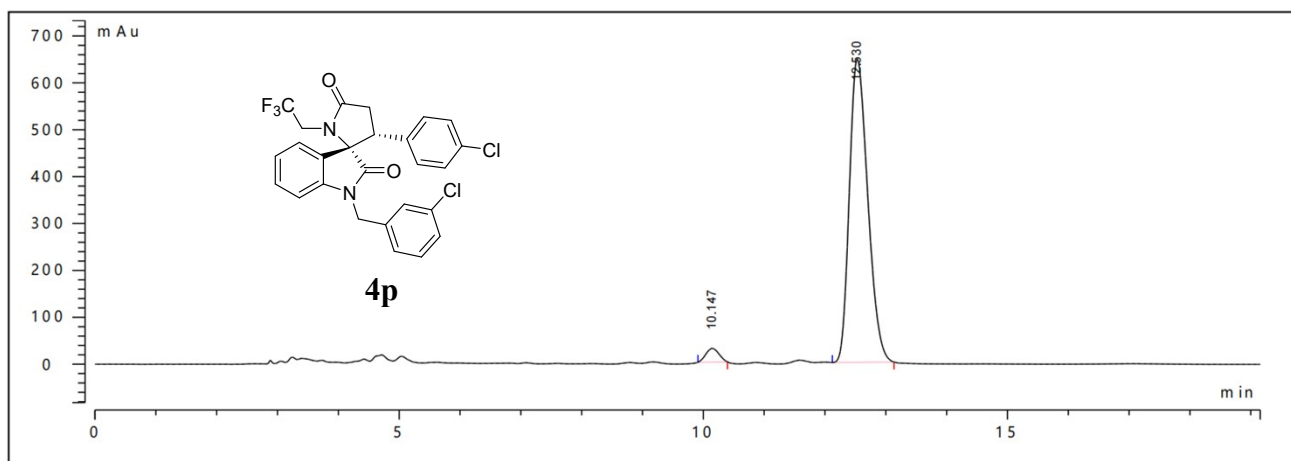

| No | Name (NA) | Ret. time (min) | Area (mAu*s) | Plate number (min) | Tailing (mAu) | Area (%) (NA) |
|----|-----------|-----------------|--------------|--------------------|---------------|---------------|
| 1  | N.A.      | 10.147          | 434.420      | 0.406              | 29.148        | 3.094         |
| 2  | N.A.      | 12.530          | 13607.859    | 0.546              | 647.423       | 96.906        |
| 3  |           |                 |              |                    |               |               |

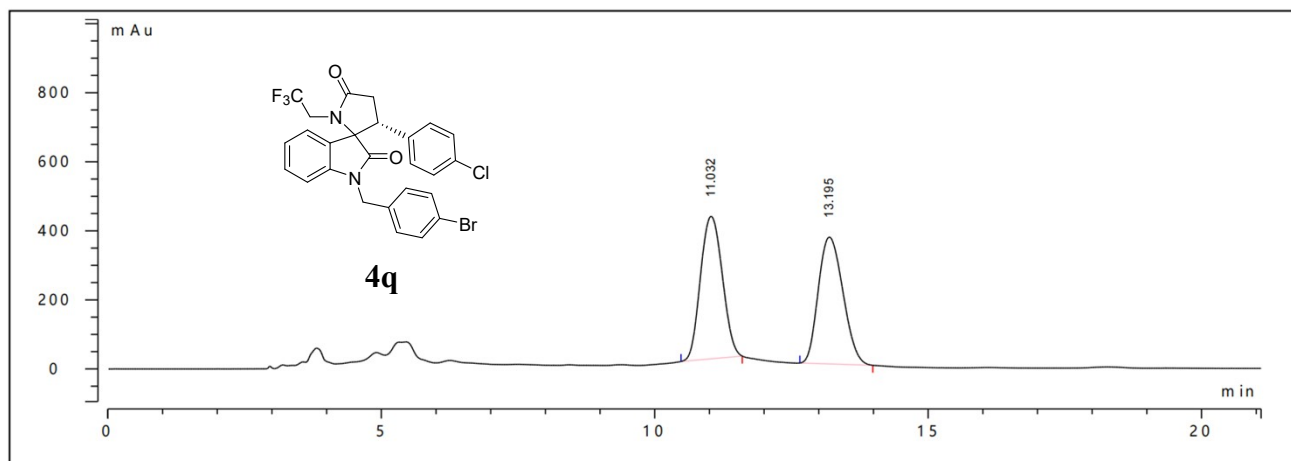

| No | Name (NA) | Ret. time (min) | Area (mAu*s) | Plate number (min) | Tailing (mAu) | Area (%) (NA) |
|----|-----------|-----------------|--------------|--------------------|---------------|---------------|
| 1  | N.A.      | 11.032          | 11464.294    | 0.713              | 413.116       | 49.876        |
| 2  | N.A.      | 13.195          | 11521.472    | 0.802              | 367.625       | 50.124        |
| 3  |           |                 |              |                    |               |               |

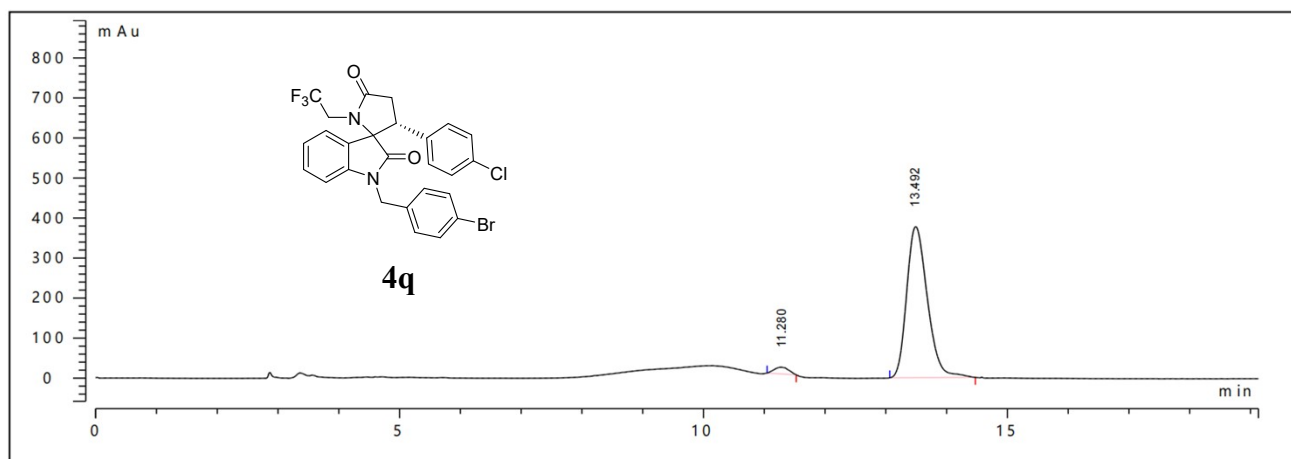

| No | Name (NA) | Ret. time (min) | Area (mAu*s) | Plate number (min) | Tailing (mAu) | Area (%) (NA) |
|----|-----------|-----------------|--------------|--------------------|---------------|---------------|
| 1  | N.A.      | 11.280          | 277.613      | 0.411              | 16.684        | 3.012         |
| 2  | N.A.      | 13.492          | 8939.541     | 0.593              | 377.788       | 96.988        |
| 3  |           |                 |              |                    |               |               |

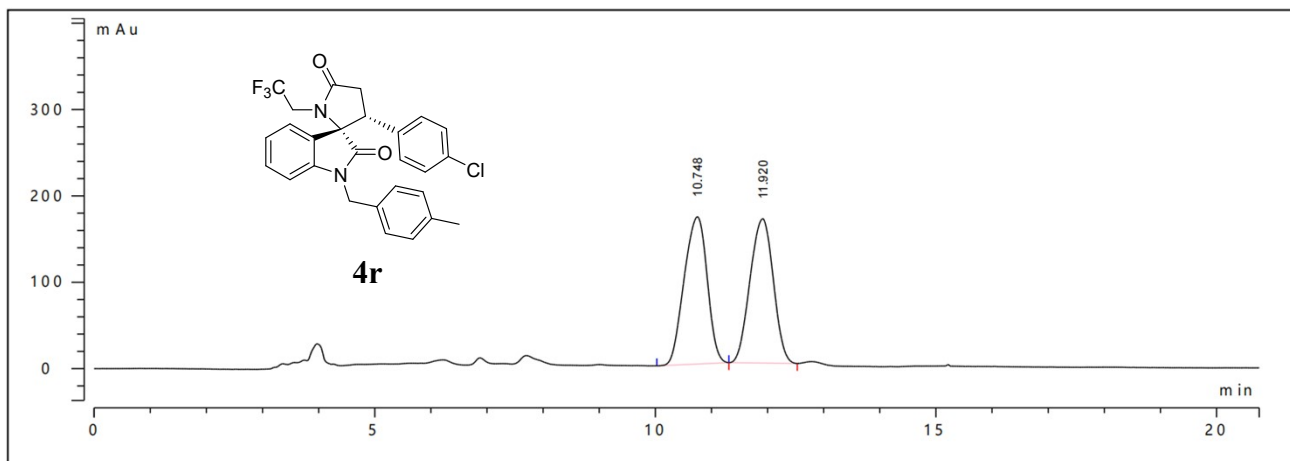

| No | Name (NA) | Ret. time (min) | Area (mAu*s) | Plate number (min) | Tailing (mAu) | Area (%) (NA) |
|----|-----------|-----------------|--------------|--------------------|---------------|---------------|
| 1  | N.A.      | 10.748          | 4858.716     | 0.742              | 170.717       | 50.193        |
| 2  | N.A.      | 11.920          | 4821.338     | 0.749              | 167.276       | 49.807        |
| 3  |           |                 |              |                    |               |               |

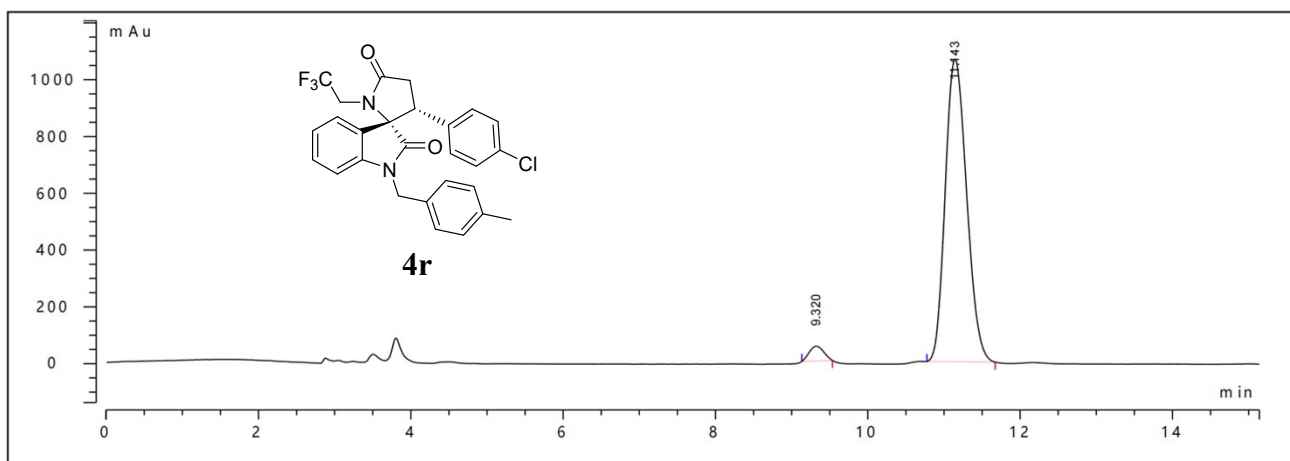

| No | Name (NA) | Ret. time (min) | Area (mAu*s) | Plate number (min) | Tailing (mAu) | Area (%) (NA) |
|----|-----------|-----------------|--------------|--------------------|---------------|---------------|
| 1  | N.A.      | 9.320           | 686.225      | 0.356              | 52.288        | 3.188         |
| 2  | N.A.      | 11.143          | 20837.244    | 0.500              | 1066.637      | 96.812        |
| 3  |           |                 |              |                    |               |               |

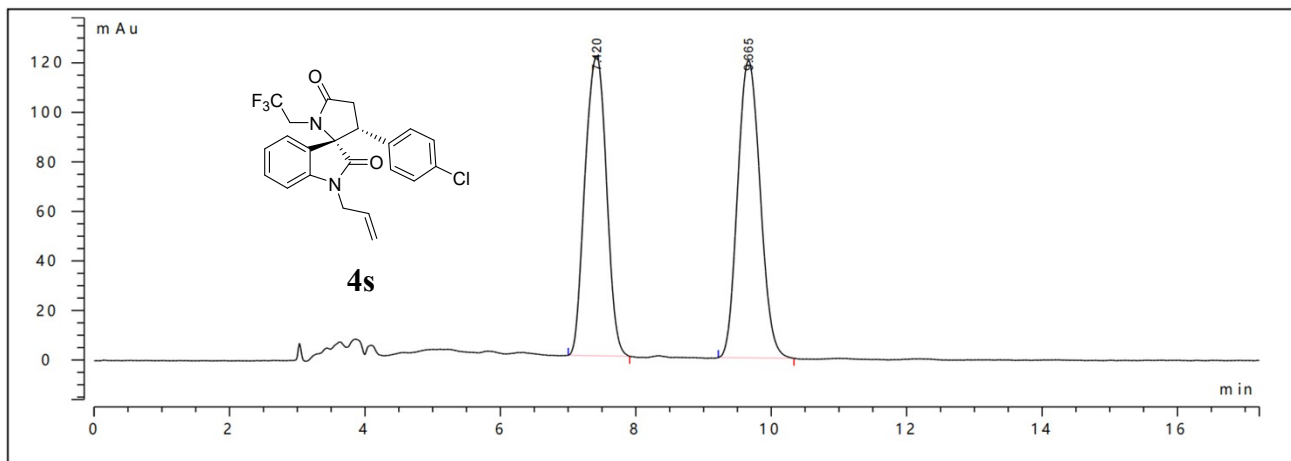

| No | Name (NA) | Ret. time (min) | Area (mAu*s) | Plate number (min) | Tailing (mAu) | Area (%) (NA) |
|----|-----------|-----------------|--------------|--------------------|---------------|---------------|
| 1  | N.A.      | 7.420           | 2661.498     | 0.564              | 121.099       | 48.928        |
| 2  | N.A.      | 9.665           | 2778.120     | 0.599              | 120.133       | 51.072        |
| 3  |           |                 |              |                    |               |               |

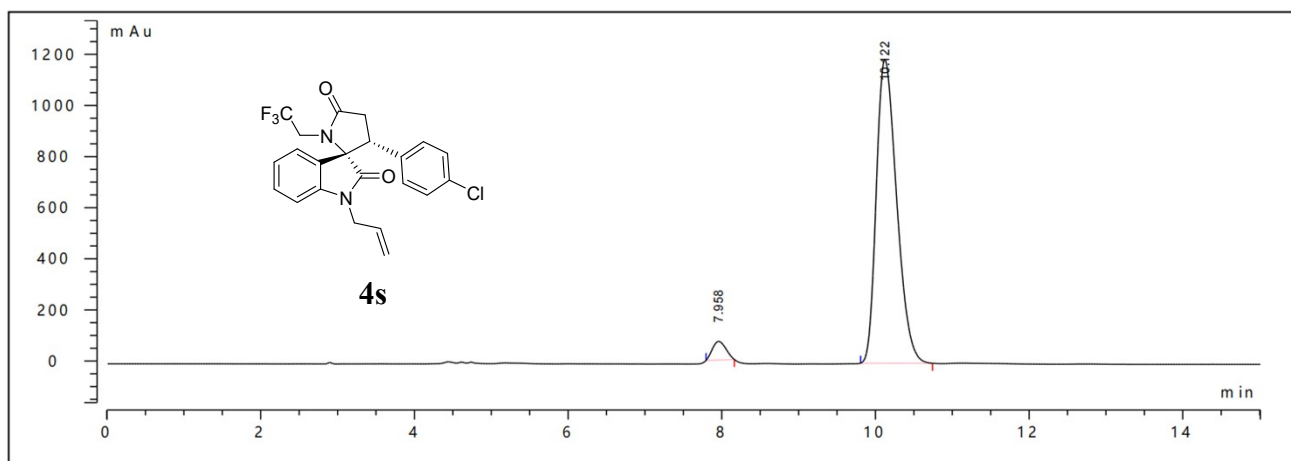

| No | Name (NA) | Ret. time (min) | Area (mAu*s) | Plate number (min) | Tailing (mAu) | Area (%) (NA) |
|----|-----------|-----------------|--------------|--------------------|---------------|---------------|
| 1  | N.A.      | 7.958           | 884.792      | 0.325              | 73.280        | 3.887         |
| 2  | N.A.      | 10.122          | 21877.929    | 0.469              | 1191.146      | 96.113        |
| 3  |           |                 |              |                    |               |               |



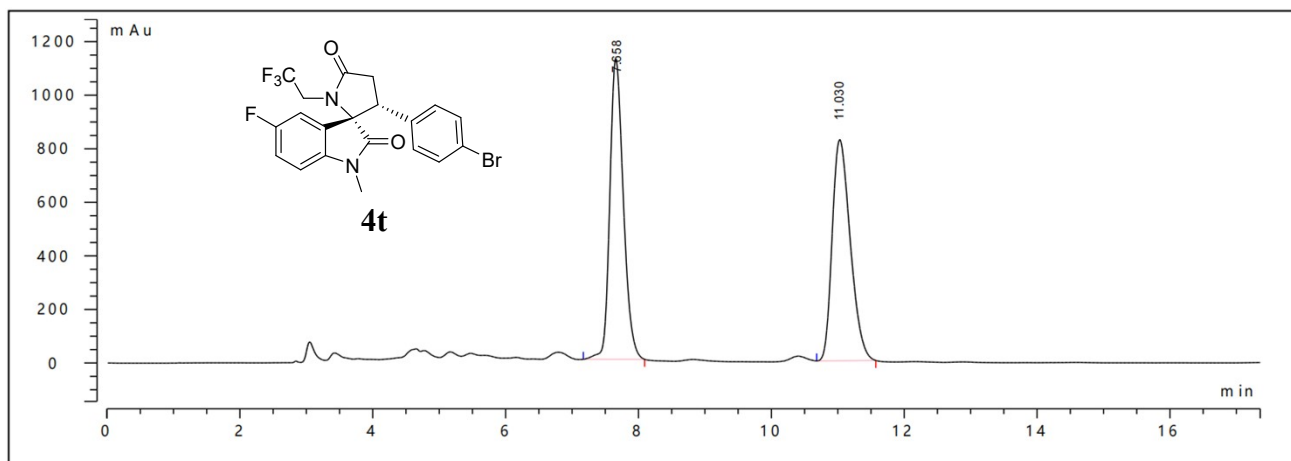

| No | Name (NA) | Ret. time (min) | Area (mAu*s) | Plate number (min) | Tailing (mAu) | Area (%) (NA) |
|----|-----------|-----------------|--------------|--------------------|---------------|---------------|
| 1  | N.A.      | 7.658           | 15905.023    | 0.354              | 1126.434      | 50.511        |
| 2  | N.A.      | 11.030          | 15583.243    | 0.485              | 826.622       | 49.489        |
| 3  |           |                 |              |                    |               |               |

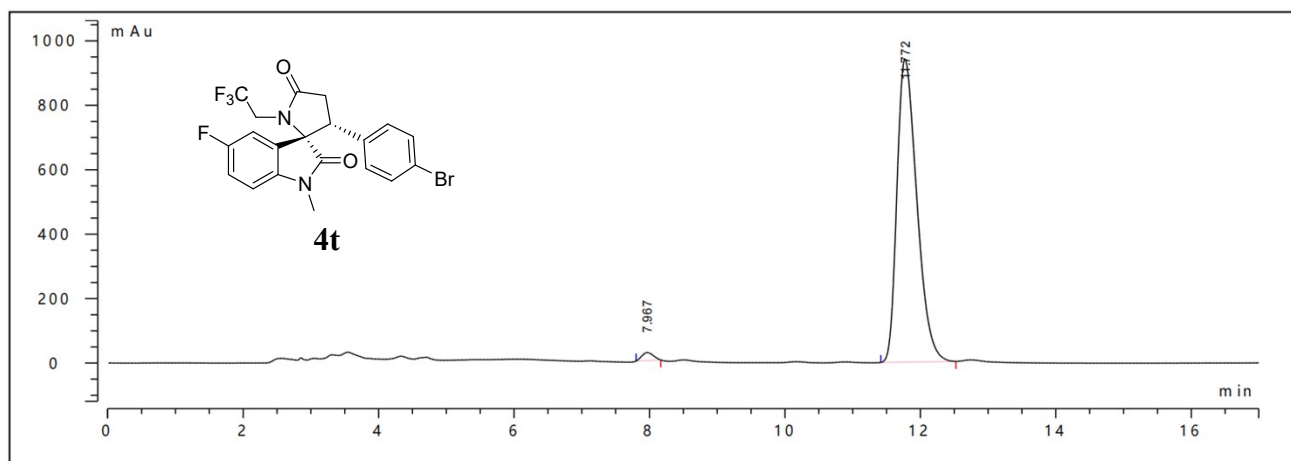

| No | Name (NA) | Ret. time (min) | Area (mAu*s) | Plate number (min) | Tailing (mAu) | Area (%) (NA) |
|----|-----------|-----------------|--------------|--------------------|---------------|---------------|
| 1  | N.A.      | 7.967           | 290.342      | 0.311              | 24.871        | 1.489         |
| 2  | N.A.      | 11.772          | 19214.208    | 0.522              | 941.965       | 98.511        |
| 3  |           |                 |              |                    |               |               |

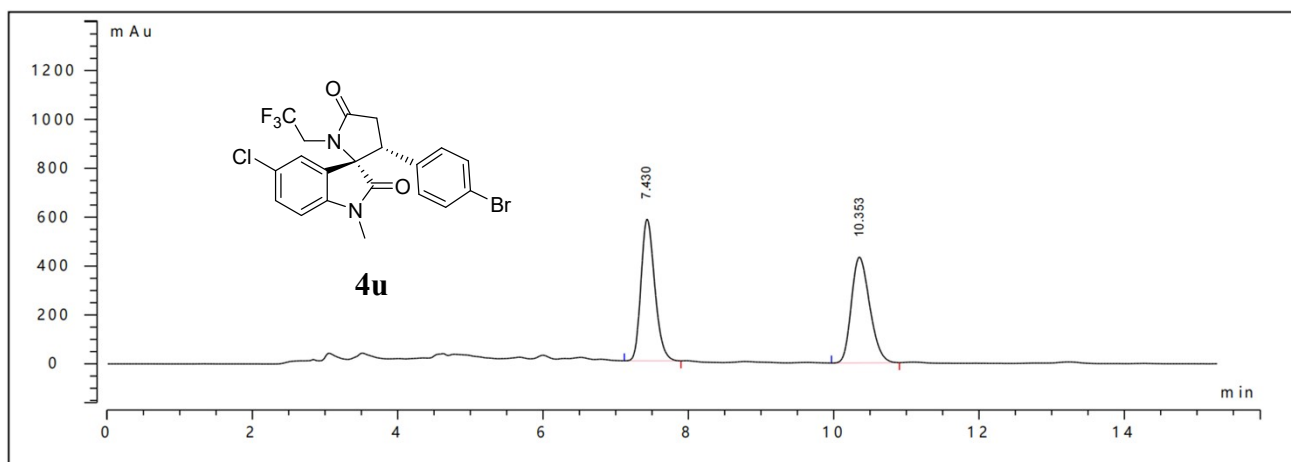

| No | Name (NA) | Ret. time (min) | Area (mAu*s) | Plate number (min) | Tailing (mAu) | Area (%) (NA) |
|----|-----------|-----------------|--------------|--------------------|---------------|---------------|
| 1  | N.A.      | 7.430           | 7646.266     | 0.336              | 581.030       | 50.174        |
| 2  | N.A.      | 10.353          | 7593.246     | 0.447              | 433.425       | 49.826        |
| 3  |           |                 |              |                    |               |               |

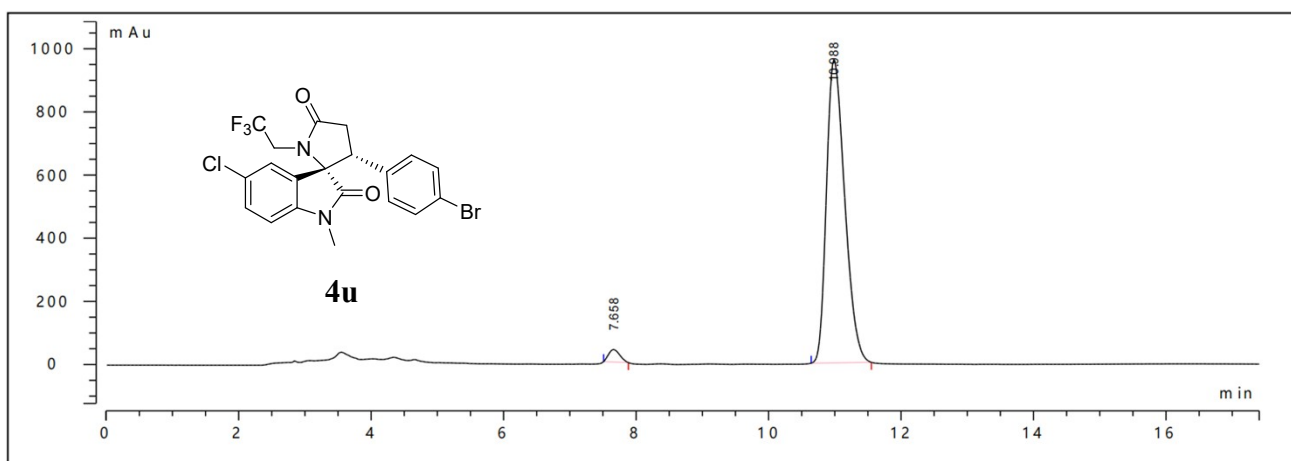

| No | Name (NA) | Ret. time (min) | Area (mAu*s) | Plate number (min) | Tailing (mAu) | Area (%) (NA) |
|----|-----------|-----------------|--------------|--------------------|---------------|---------------|
| 1  | N.A.      | 7.658           | 461.811      | 0.318              | 39.651        | 2.449         |
| 2  | N.A.      | 10.988          | 18391.791    | 0.495              | 959.785       | 97.551        |
| 3  |           |                 |              |                    |               |               |

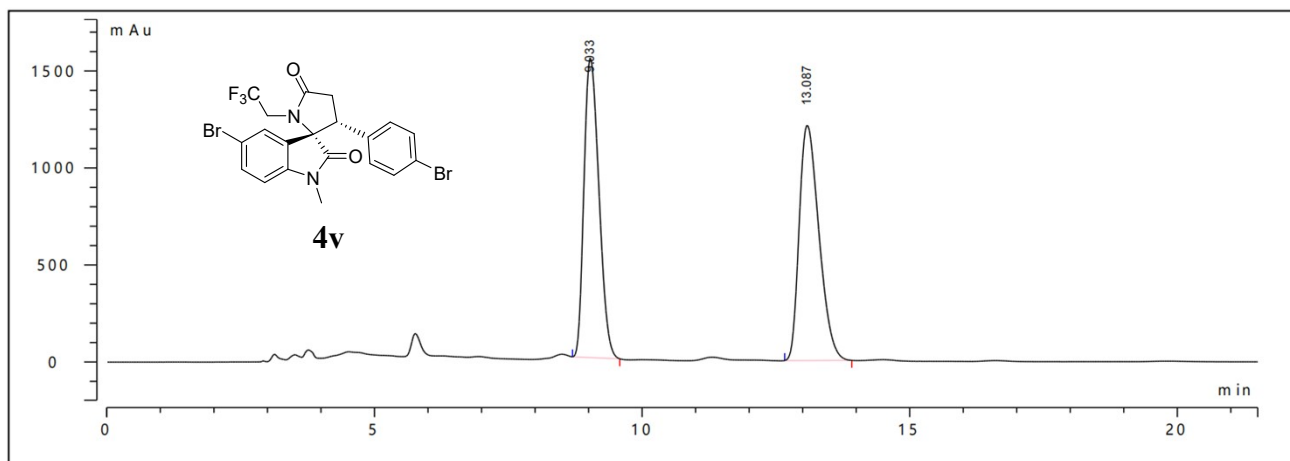

| No | Name (NA) | Ret. time (min) | Area (mAu*s) | Plate number (min) | Tailing (mAu) | Area (%) (NA) |
|----|-----------|-----------------|--------------|--------------------|---------------|---------------|
| 1  | N.A.      | 9.033           | 29962.646    | 0.497              | 1546.765      | 49.055        |
| 2  | N.A.      | 13.087          | 31117.615    | 0.659              | 1213.644      | 50.945        |
| 3  |           |                 |              |                    |               |               |

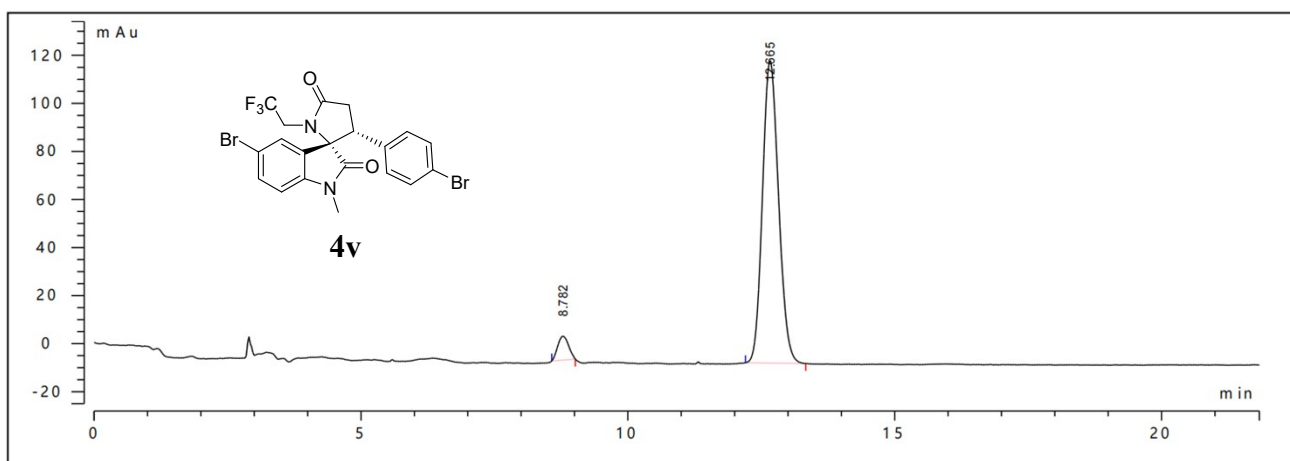

| No | Name (NA) | Ret. time (min) | Area (mAu*s) | Plate number (min) | Tailing (mAu) | Area (%) (NA) |
|----|-----------|-----------------|--------------|--------------------|---------------|---------------|
| 1  | N.A.      | 8.782           | 140.148      | 0.373              | 9.980         | 5.040         |
| 2  | N.A.      | 12.665          | 2640.473     | 0.547              | 126.249       | 94.960        |
| 3  |           |                 |              |                    |               |               |

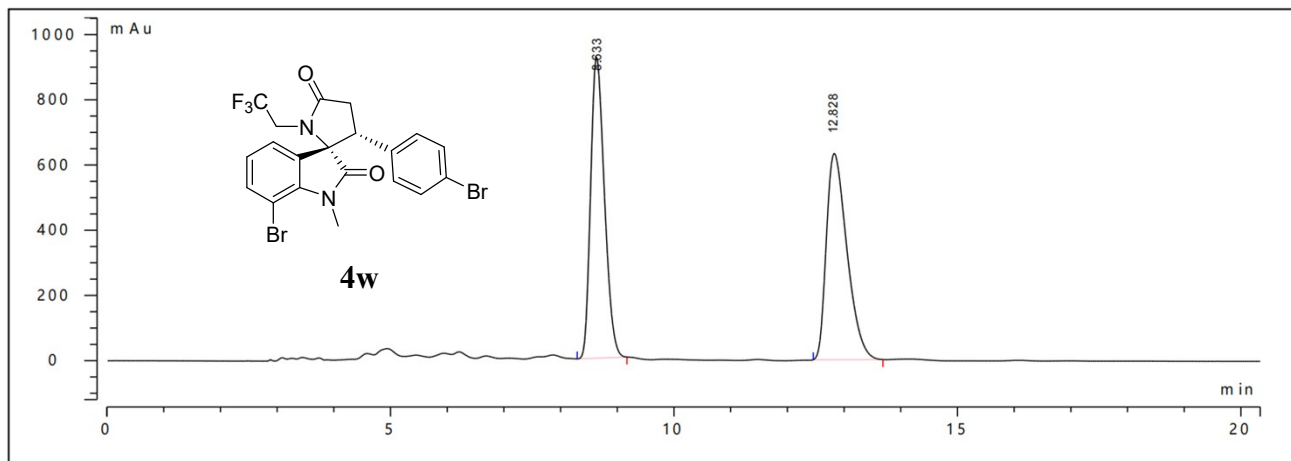

| No | Name (NA) | Ret. time (min) | Area (mAu*s) | Plate number (min) | Tailing (mAu) | Area (%) (NA) |
|----|-----------|-----------------|--------------|--------------------|---------------|---------------|
| 1  | N.A.      | 8.633           | 15599.201    | 0.437              | 927.038       | 49.384        |
| 2  | N.A.      | 12.828          | 15988.563    | 0.640              | 633.616       | 50.616        |
| 3  |           |                 |              |                    |               |               |

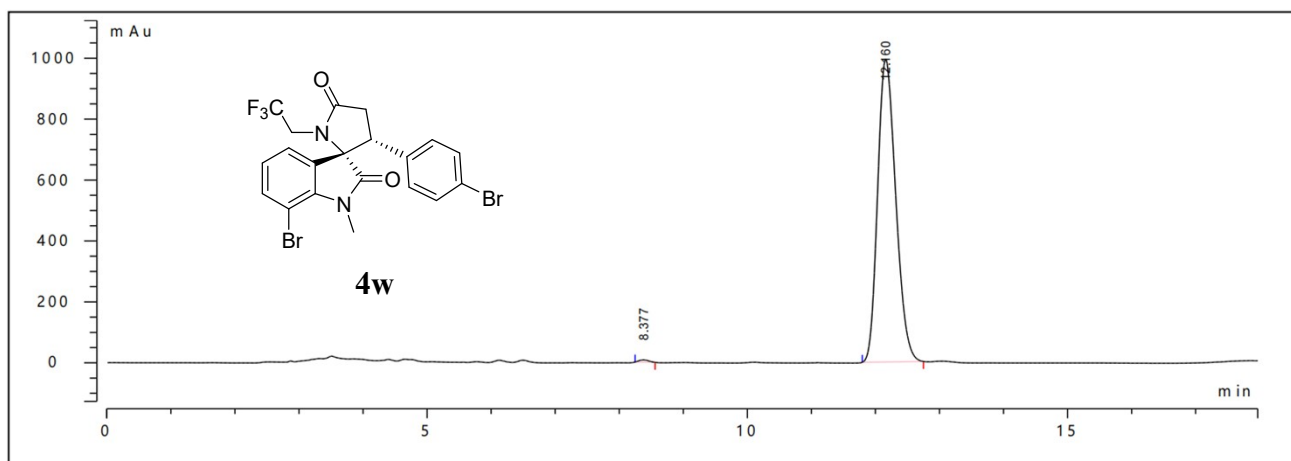

| No | Name (NA) | Ret. time (min) | Area (mAu*s) | Plate number (min) | Tailing (mAu) | Area (%) (NA) |
|----|-----------|-----------------|--------------|--------------------|---------------|---------------|
| 1  | N.A.      | 8.377           | 76.874       | 0.279              | 7.416         | 0.392         |
| 2  | N.A.      | 12.160          | 19520.742    | 0.506              | 995.751       | 99.608        |
| 3  |           |                 |              |                    |               |               |

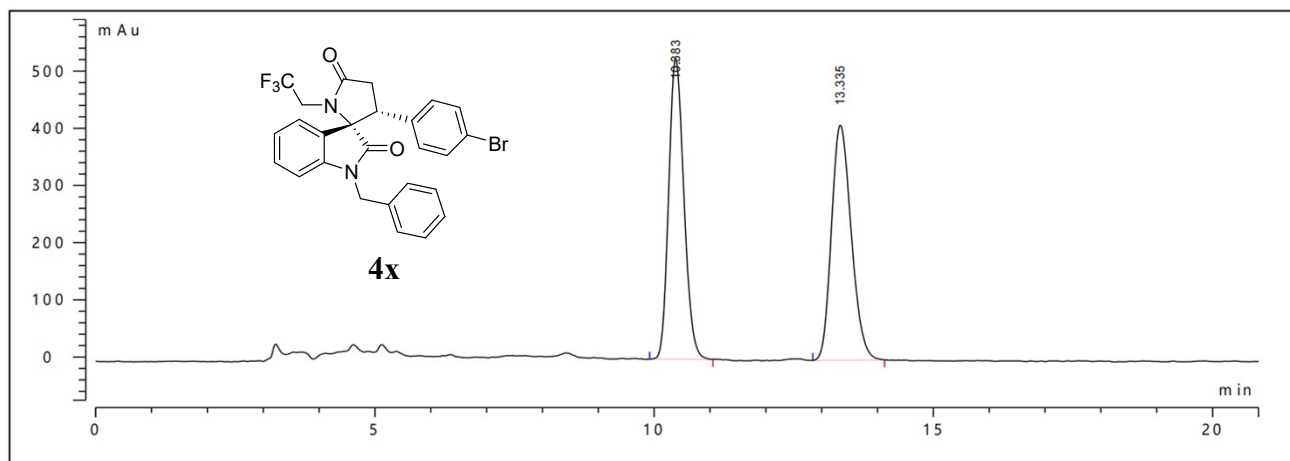

| No | Name (NA) | Ret. time (min) | Area (mAu*s) | Plate number (min) | Tailing (mAu) | Area (%) (NA) |
|----|-----------|-----------------|--------------|--------------------|---------------|---------------|
| 1  | N.A.      | 10.383          | 9971.874     | 0.478              | 527.606       | 49.586        |
| 2  | N.A.      | 13.335          | 10138.334    | 0.625              | 411.585       | 50.414        |
| 3  |           |                 |              |                    |               |               |

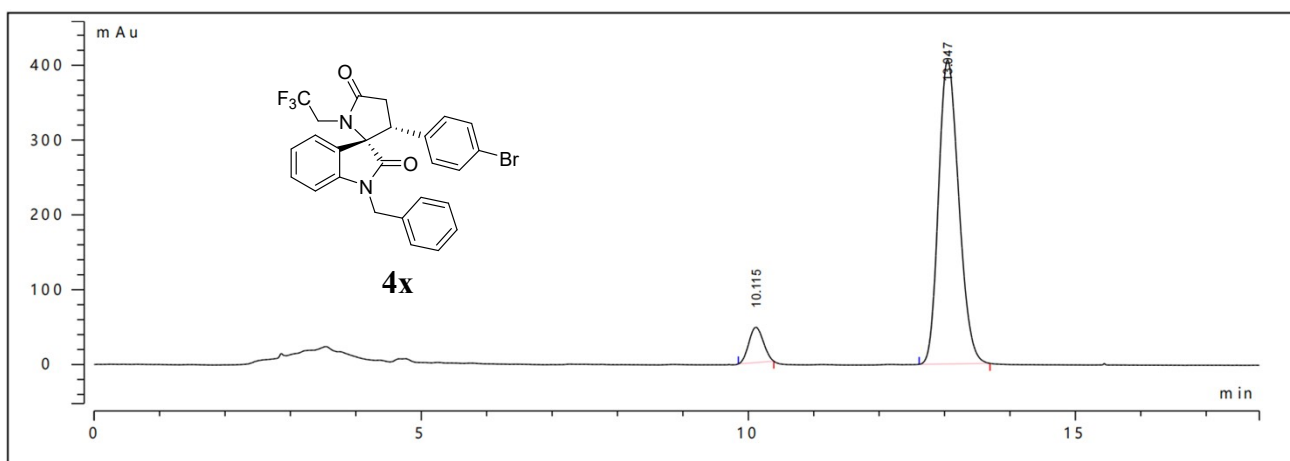

| No | Name (NA) | Ret. time (min) | Area (mAu*s) | Plate number (min) | Tailing (mAu) | Area (%) (NA) |
|----|-----------|-----------------|--------------|--------------------|---------------|---------------|
| 1  | N.A.      | 10.115          | 723.365      | 0.408              | 47.345        | 7.653         |
| 2  | N.A.      | 13.047          | 8728.382     | 0.554              | 406.703       | 92.347        |
| 3  |           |                 |              |                    |               |               |

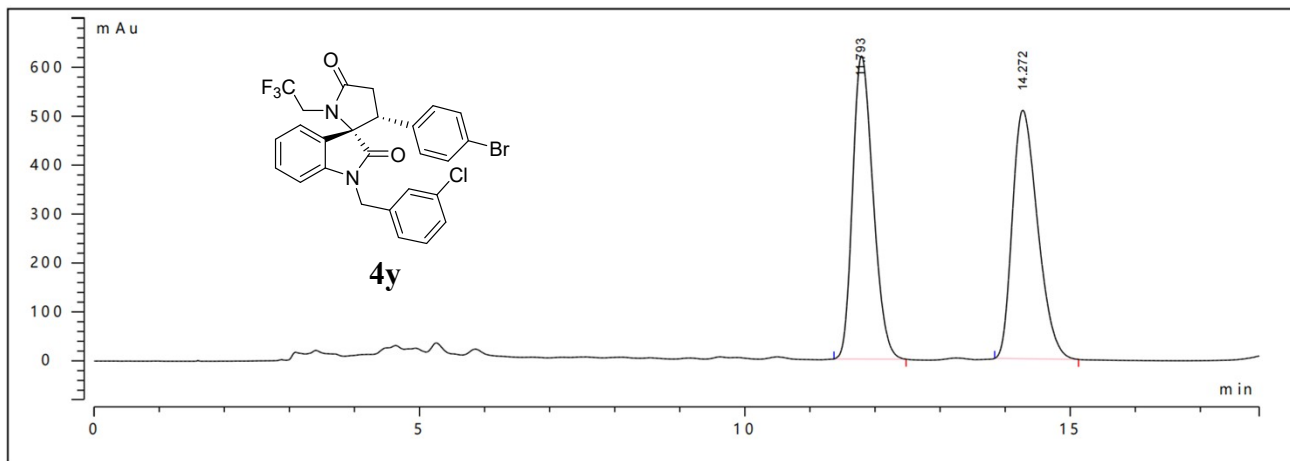

| No | Name (NA) | Ret. time (min) | Area (mAu*s) | Plate number (min) | Tailing (mAu) | Area (%) (NA) |
|----|-----------|-----------------|--------------|--------------------|---------------|---------------|
| 1  | N.A.      | 11.793          | 13537.944    | 0.562              | 620.068       | 49.661        |
| 2  | N.A.      | 14.272          | 13722.621    | 0.690              | 508.170       | 50.339        |
| 3  |           |                 |              |                    |               |               |

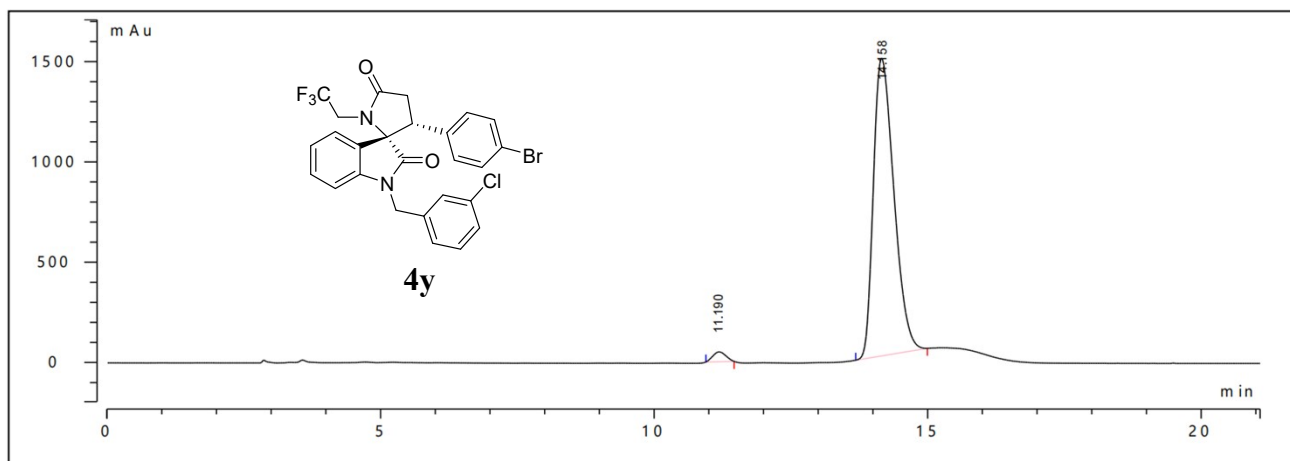

| No | Name (NA) | Ret. time (min) | Area (mAu*s) | Plate number (min) | Tailing (mAu) | Area (%) (NA) |
|----|-----------|-----------------|--------------|--------------------|---------------|---------------|
| 1  | N.A.      | 11.190          | 807.988      | 0.445              | 48.916        | 2.045         |
| 2  | N.A.      | 14.158          | 38695.823    | 0.665              | 1485.688      | 97.955        |
| 3  |           |                 |              |                    |               |               |

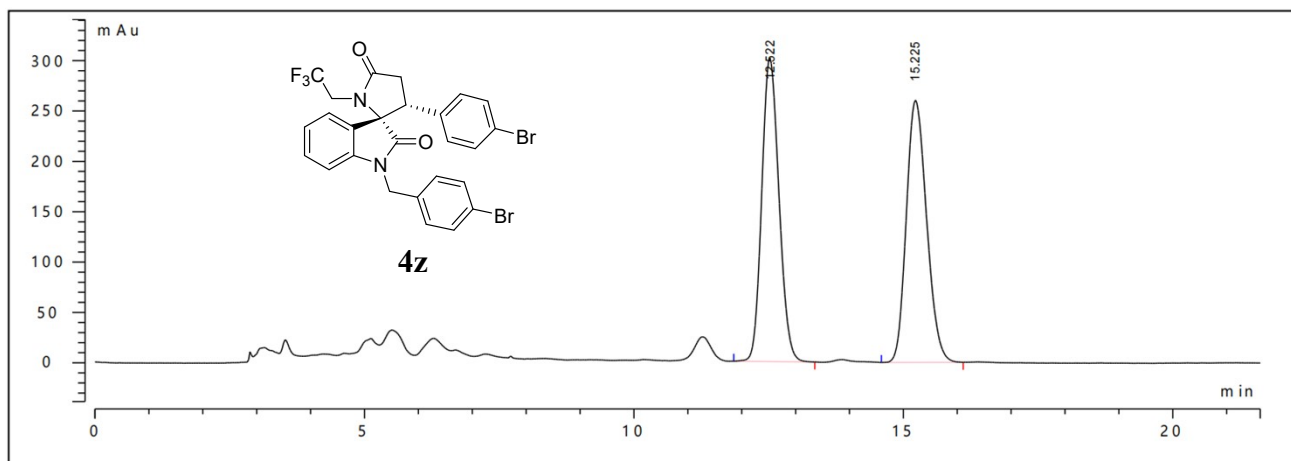

| No | Name (NA) | Ret. time (min) | Area (mAu*s) | Plate number (min) | Tailing (mAu) | Area (%) (NA) |
|----|-----------|-----------------|--------------|--------------------|---------------|---------------|
| 1  | N.A.      | 12.522          | 6690.542     | 0.570              | 301.694       | 49.519        |
| 2  | N.A.      | 15.225          | 6820.460     | 0.670              | 260.433       | 50.481        |
| 3  |           |                 |              |                    |               |               |

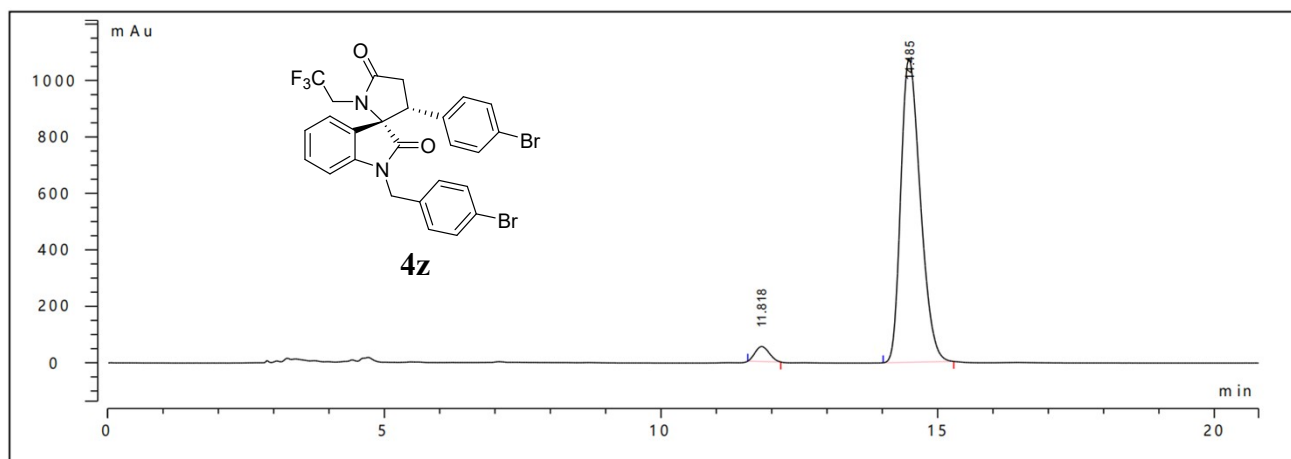

| No | Name (NA) | Ret. time (min) | Area (mAu*s) | Plate number (min) | Tailing (mAu) | Area (%) (NA) |
|----|-----------|-----------------|--------------|--------------------|---------------|---------------|
| 1  | N.A.      | 11.818          | 934.807      | 0.466              | 53.287        | 3.415         |
| 2  | N.A.      | 14.485          | 26439.765    | 0.625              | 1076.750      | 96.585        |
| 3  |           |                 |              |                    |               |               |

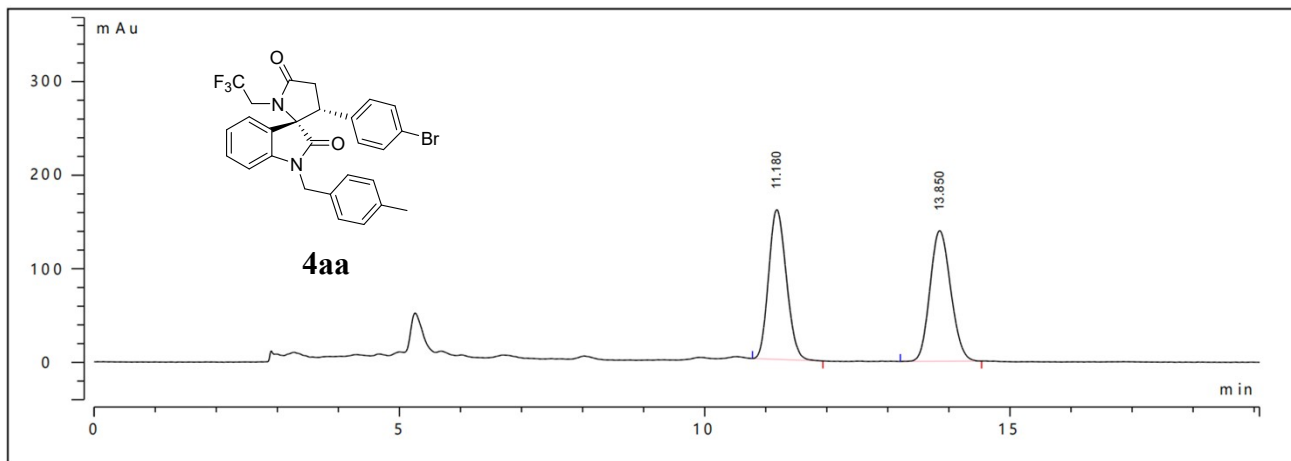

| No | Name (NA) | Ret. time (min) | Area (mAu*s) | Plate number (min) | Tailing (mAu) | Area (%) (NA) |
|----|-----------|-----------------|--------------|--------------------|---------------|---------------|
| 1  | N.A.      | 11.180          | 3237.939     | 0.519              | 160.141       | 49.506        |
| 2  | N.A.      | 13.850          | 3302.535     | 0.610              | 139.753       | 50.494        |
| 3  |           |                 |              |                    |               |               |

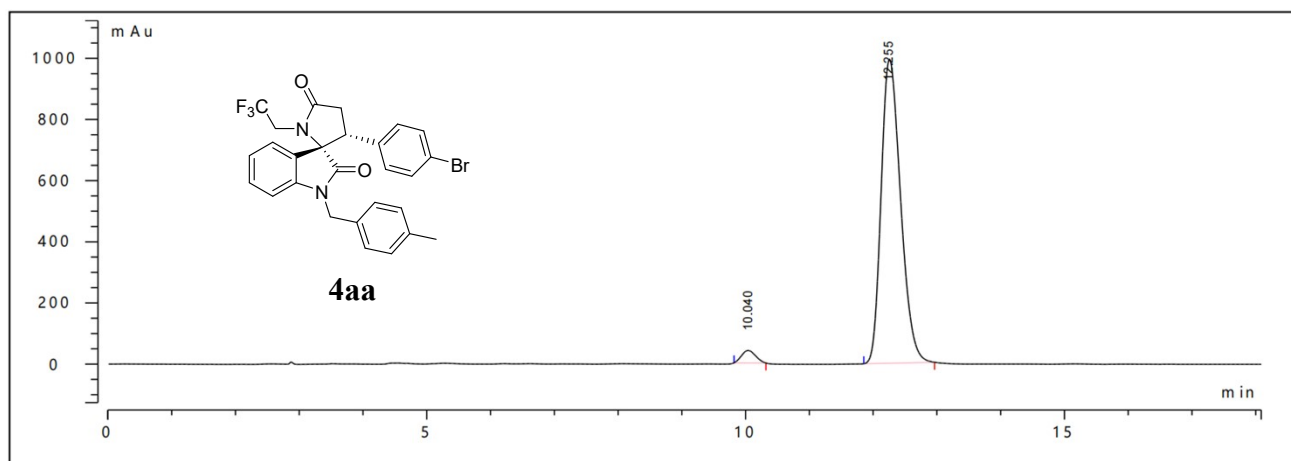

| No | Name (NA) | Ret. time (min) | Area (mAu*s) | Plate number (min) | Tailing (mAu) | Area (%) (NA) |
|----|-----------|-----------------|--------------|--------------------|---------------|---------------|
| 1  | N.A.      | 10.040          | 616.935      | 0.407              | 40.874        | 2.847         |
| 2  | N.A.      | 12.255          | 21050.243    | 0.539              | 995.480       | 97.153        |
| 3  |           |                 |              |                    |               |               |



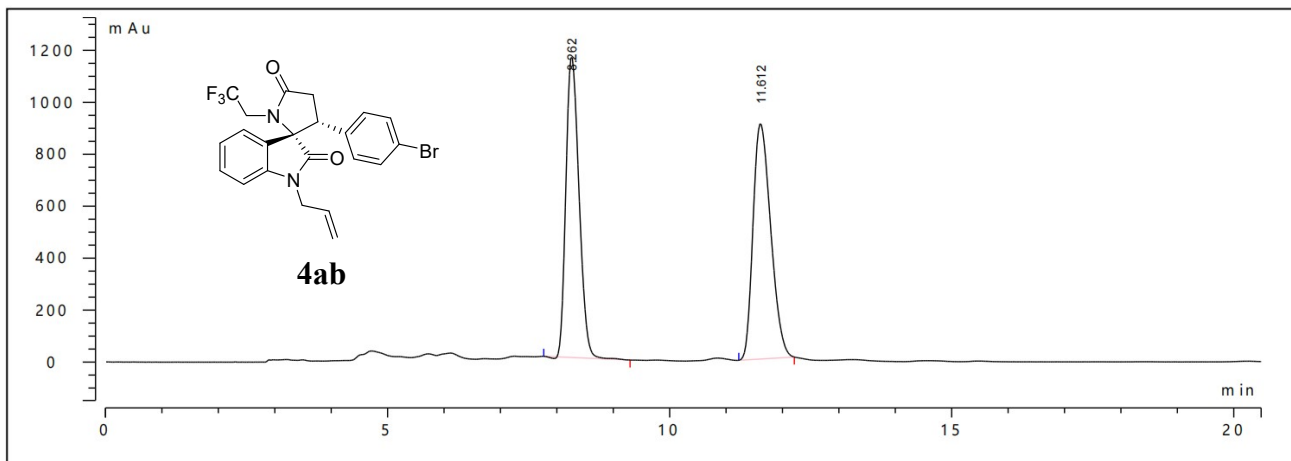

| No | Name (NA) | Ret. time (min) | Area (mAu*s) | Plate number (min) | Tailing (mAu) | Area (%) (NA) |
|----|-----------|-----------------|--------------|--------------------|---------------|---------------|
| 1  | N.A.      | 8.262           | 18678.041    | 0.417              | 1161.261      | 48.590        |
| 2  | N.A.      | 11.612          | 19761.943    | 0.562              | 907.565       | 51.410        |
| 3  |           |                 |              |                    |               |               |

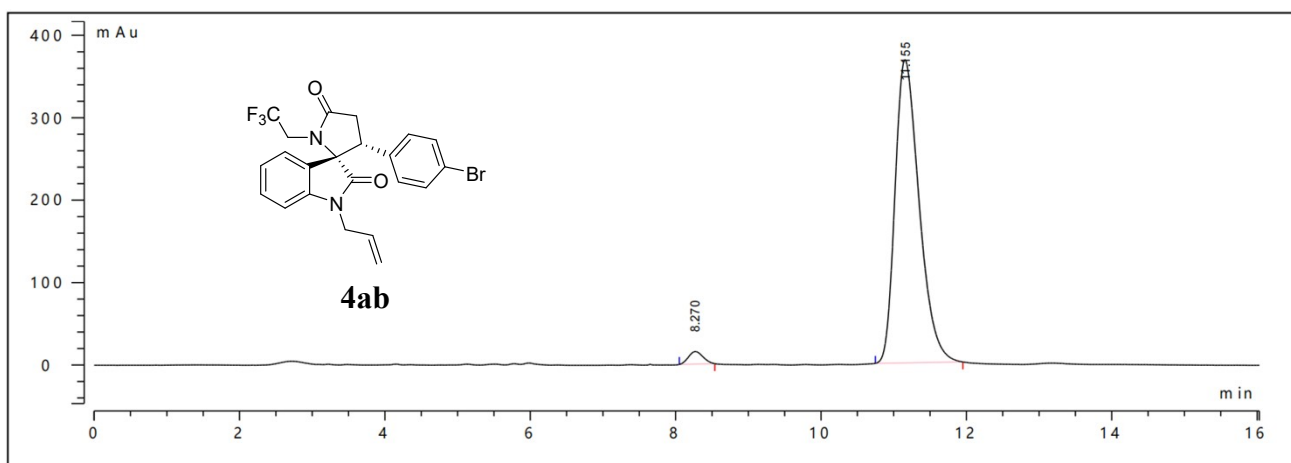

| No | Name (NA) | Ret. time (min) | Area (mAu*s) | Plate number (min) | Tailing (mAu) | Area% (%) (NA) |
|----|-----------|-----------------|--------------|--------------------|---------------|----------------|
| 1  | N.A.      | 8.270           | 210.352      | 0.368              | 15.246        | 2.422          |
| 2  | N.A.      | 11.155          | 8473.700     | 0.589              | 367.812       | 97.578         |
| 3  |           |                 | 8684.052     |                    |               |                |

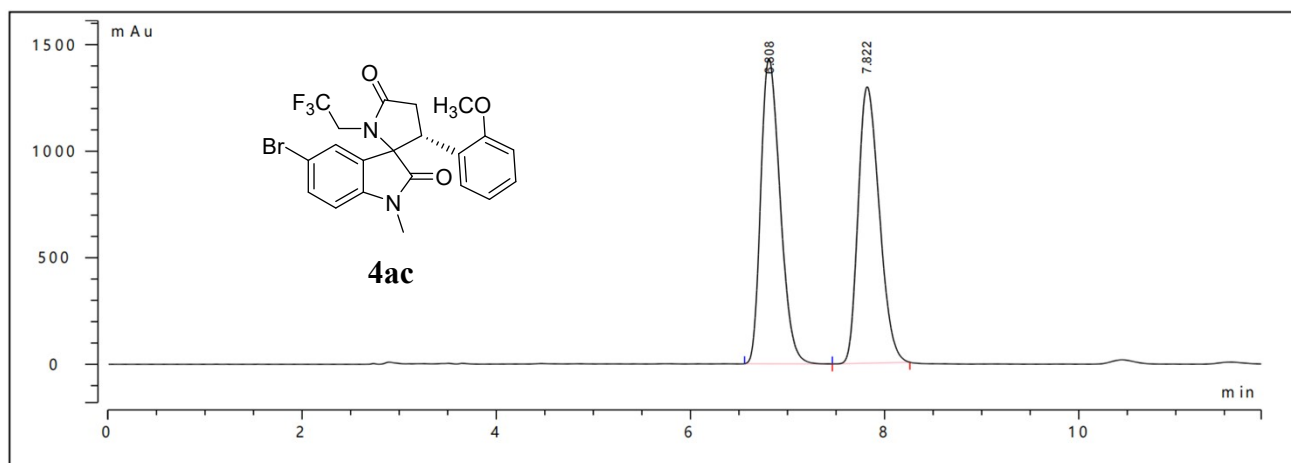

| No | Name (NA) | Ret. time (min) | Area (mAu*s) | Plate number (min) | Tailing (mAu) | Area (%) (NA) |
|----|-----------|-----------------|--------------|--------------------|---------------|---------------|
| 1  | N.A.      | 6.808           | 19805.057    | 0.353              | 1430.846      | 50.199        |
| 2  | N.A.      | 7.822           | 19647.944    | 0.394              | 1296.626      | 49.801        |
| 3  |           |                 |              |                    |               |               |

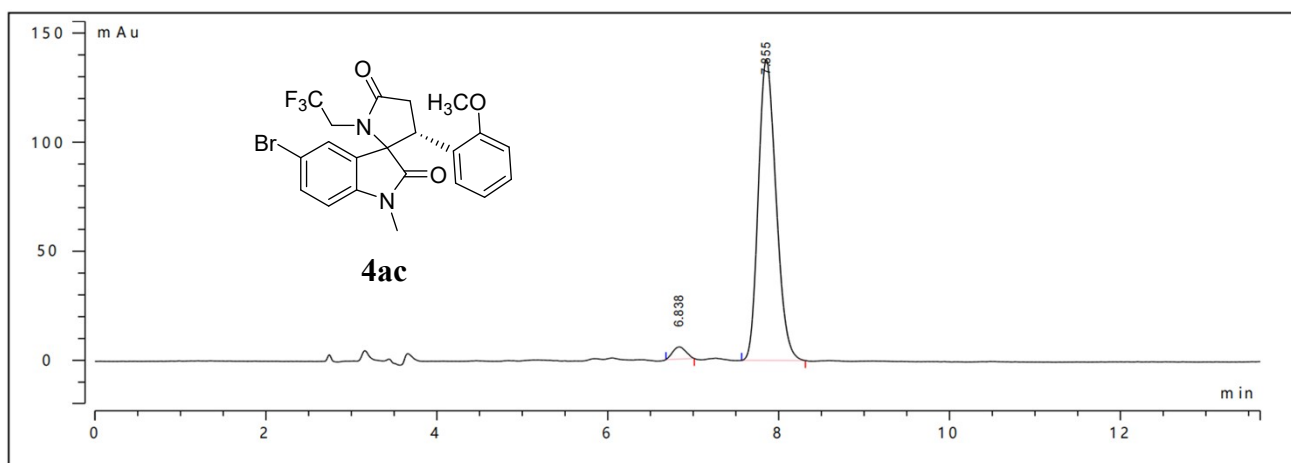

| No | Name (NA) | Ret. time (min) | Area (mAu*s) | Plate number (min) | Tailing (mAu) | Area (%) (NA) |
|----|-----------|-----------------|--------------|--------------------|---------------|---------------|
| 1  | N.A.      | 6.838           | 59.587       | 0.291              | 5.568         | 2.904         |
| 2  | N.A.      | 7.855           | 1992.422     | 0.368              | 137.853       | 97.096        |
| 3  |           |                 |              |                    |               |               |

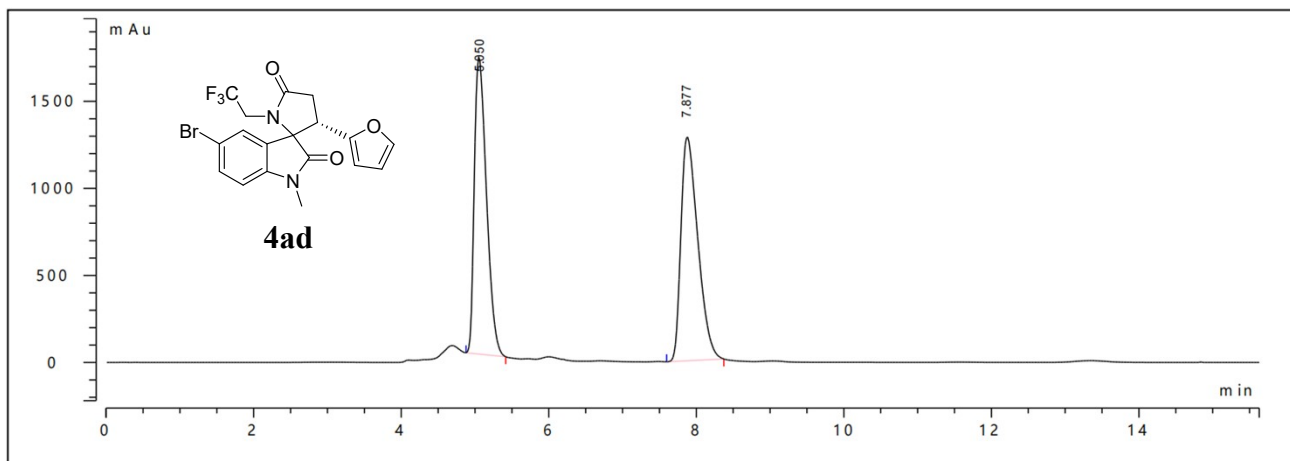

| No | Name (NA) | Ret. time (min) | Area (mAu*s) | Plate number (min) | Tailing (mAu) | Area (%) (NA) |
|----|-----------|-----------------|--------------|--------------------|---------------|---------------|
| 1  | N.A.      | 5.050           | 19518.295    | 0.292              | 1707.437      | 48.813        |
| 2  | N.A.      | 7.877           | 20467.161    | 0.417              | 1287.445      | 51.187        |
| 3  |           |                 |              |                    |               |               |

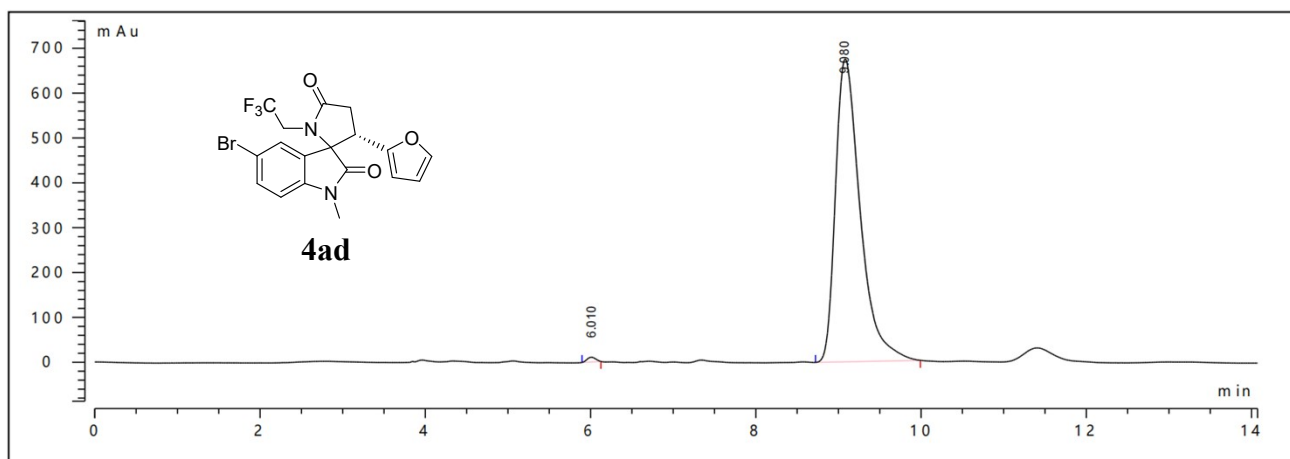

| No | Name (NA) | Ret. time (min) | Area (mAu*s) | Plate number (min) | Tailing (mAu) | Area% (%) (NA) |
|----|-----------|-----------------|--------------|--------------------|---------------|----------------|
| 1  | N.A.      | 6.010           | 76.105       | 0.194              | 10.663        | 0.539          |
| 2  | N.A.      | 9.080           | 14038.921    | 0.506              | 675.999       | 99.461         |
| 3  |           |                 | 14115.026    |                    |               |                |

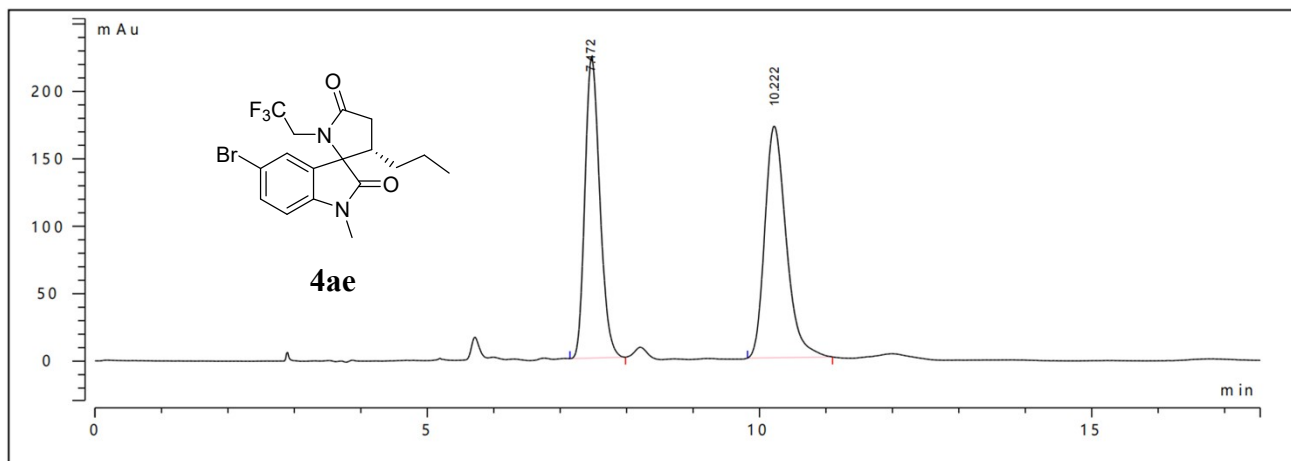

| No | Name (NA) | Ret. time (min) | Area (mAu*s) | Plate number (min) | Tailing (mAu) | Area (%) (NA) |
|----|-----------|-----------------|--------------|--------------------|---------------|---------------|
| 1  | N.A.      | 7.472           | 3474.530     | 0.397              | 223.367       | 47.471        |
| 2  | N.A.      | 10.222          | 3844.690     | 0.558              | 171.924       | 52.529        |
| 3  |           |                 |              |                    |               |               |

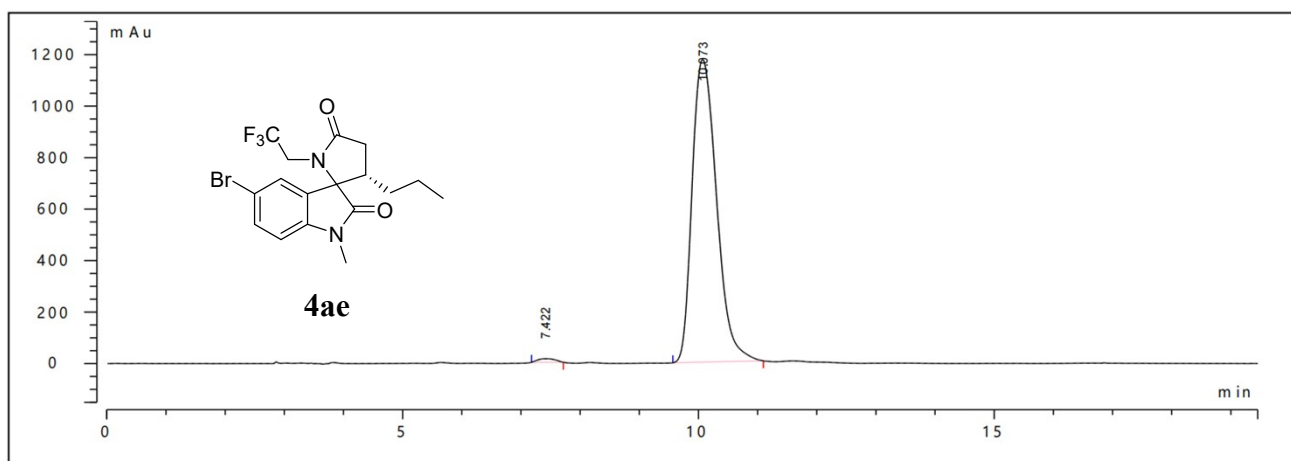

| No | Name (NA) | Ret. time (min) | Area (mAu*s) | Plate number (min) | Tailing (mAu) | Area (%) (NA) |
|----|-----------|-----------------|--------------|--------------------|---------------|---------------|
| 1  | N.A.      | 7.422           | 279.486      | 0.515              | 13.535        | 0.822         |
| 2  | N.A.      | 10.073          | 33741.667    | 0.711              | 1175.528      | 99.178        |
| 3  |           |                 |              |                    |               |               |

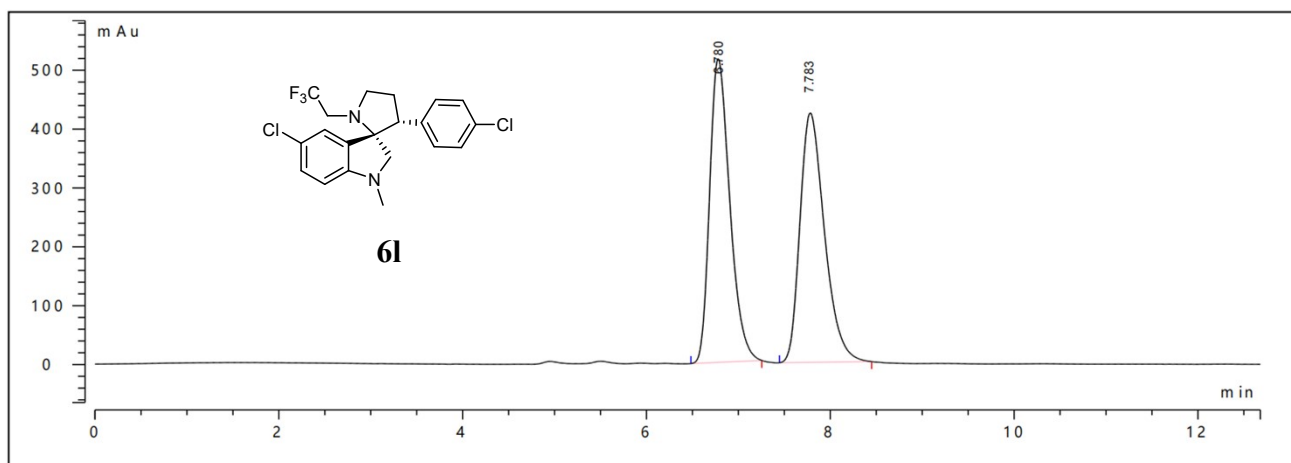

### 峰列表

| No | Name (NA) | Ret. time (min) | Area (mAu*s) | Plate number (min) | Tailing (mAu) | Area% (%) (NA) |
|----|-----------|-----------------|--------------|--------------------|---------------|----------------|
| 1  | N.A.      | 6.780           | 7847.123     | 0.390              | 515.757       | 49.991         |
| 2  | N.A.      | 7.783           | 7849.831     | 0.468              | 423.969       | 50.009         |
| 3  | 总计        |                 | 15696.954    |                    |               |                |

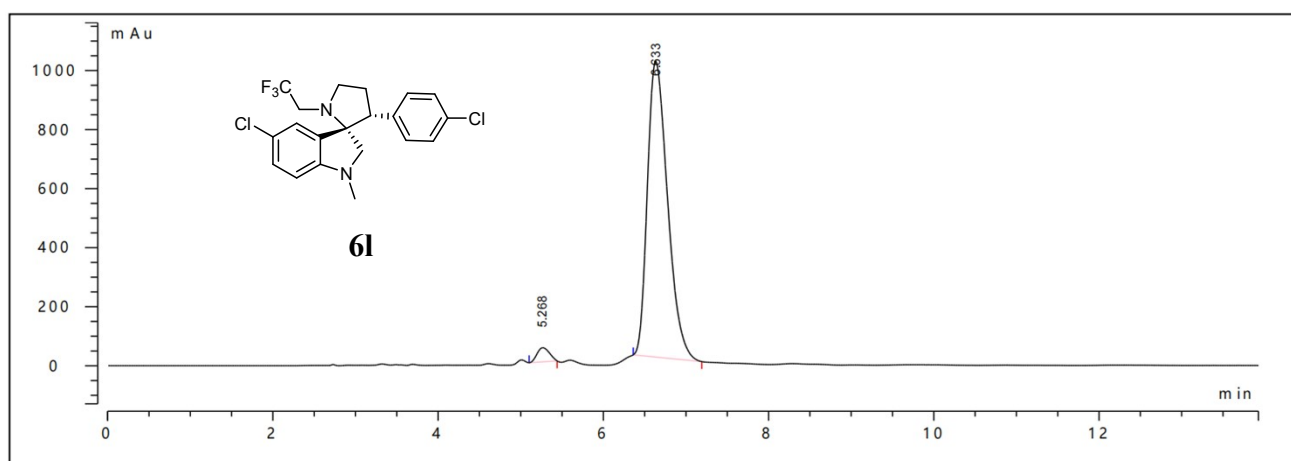

| No | Name (NA) | Ret. time (min) | Area (mAu*s) | Plate number (min) | Tailing (mAu) | Area (%) (NA) |
|----|-----------|-----------------|--------------|--------------------|---------------|---------------|
| 1  | N.A.      | 5.268           | 496.205      | 0.282              | 48.155        | 2.833         |
| 2  | N.A.      | 6.633           | 17020.935    | 0.430              | 1003.584      | 97.167        |
| 3  |           |                 |              |                    |               |               |
